# Supplementary material
Source: PubMed Central journal article supplement (PMC6015555)
Supplement: NIHMS956038-supplement-1.pdf [file NIHMS956038-supplement-1.pdf]

# Supplementary Figure 1

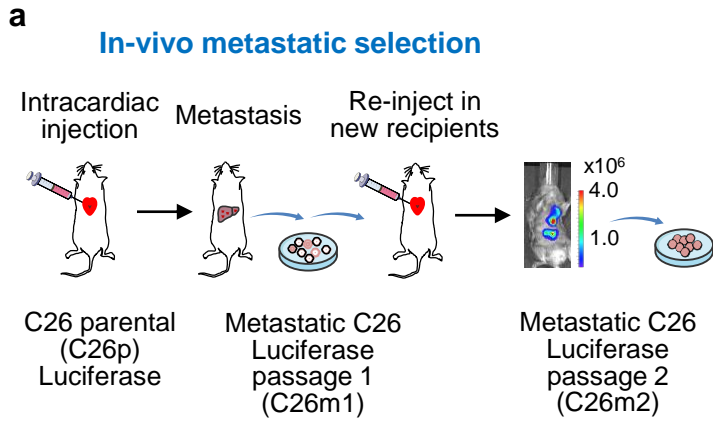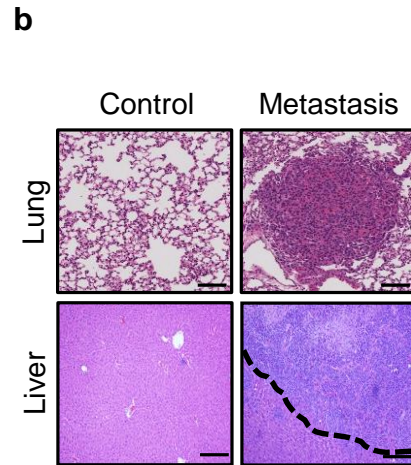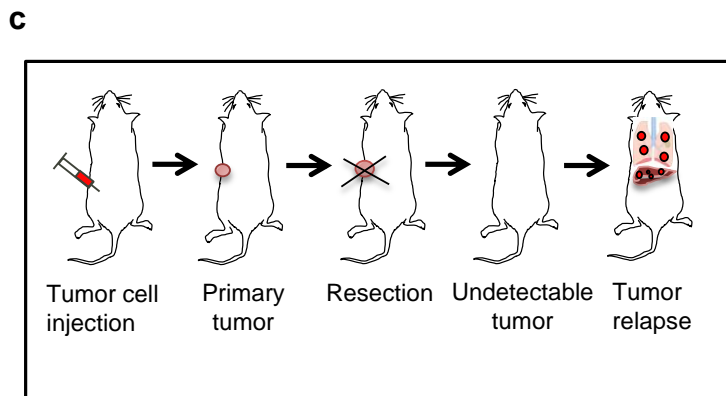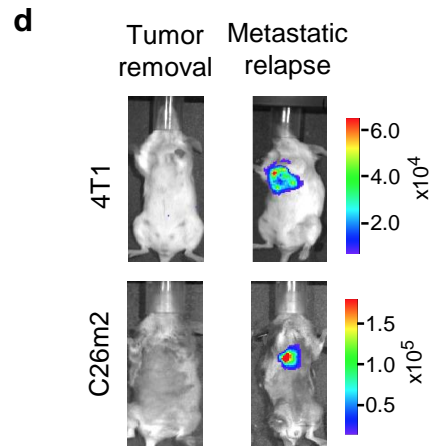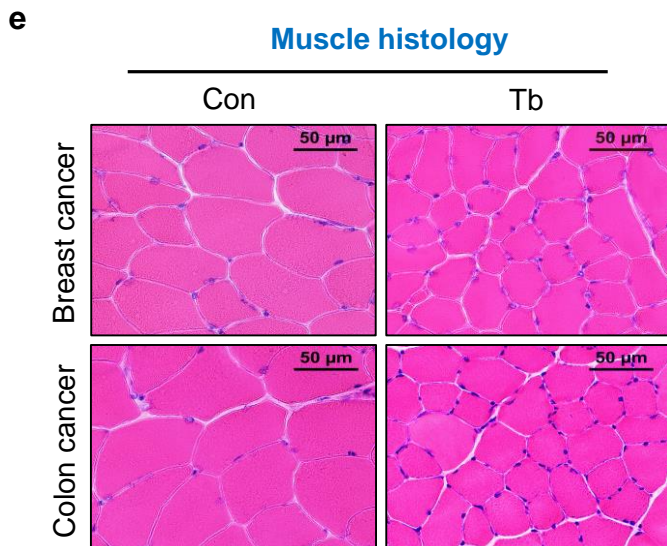

# Supplementary Figure 1

f

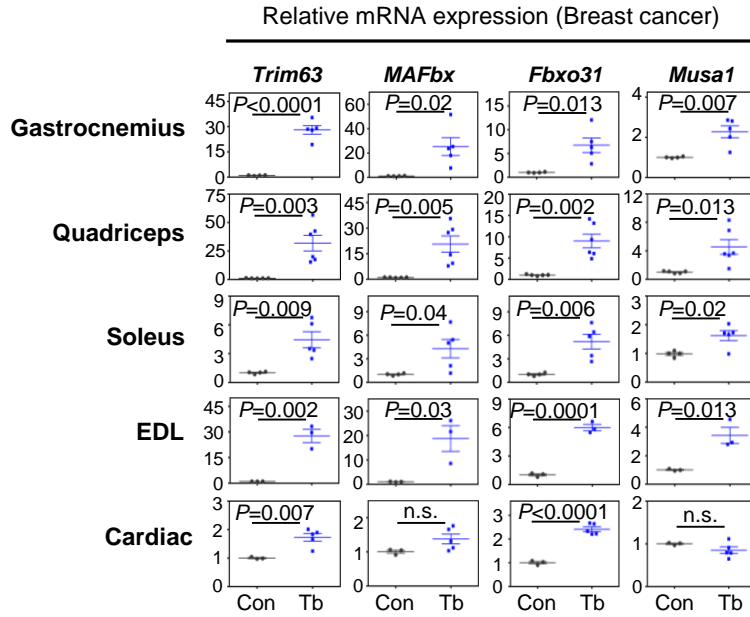

g

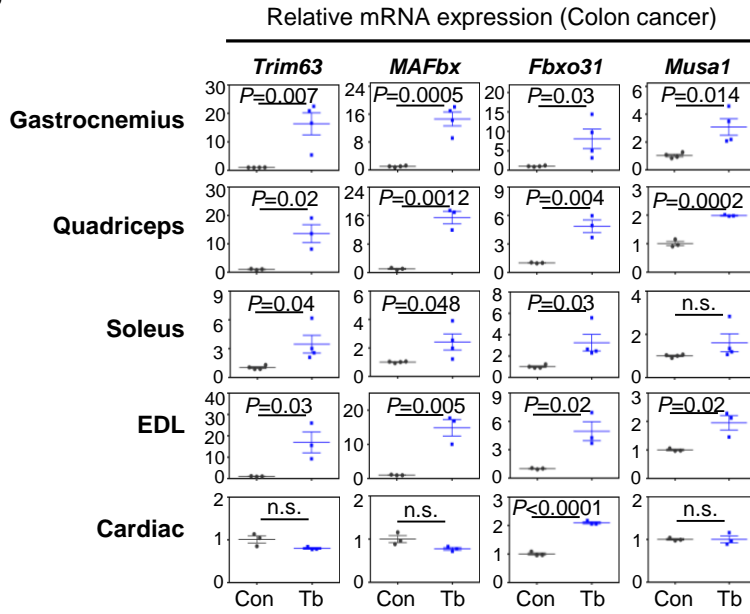

h

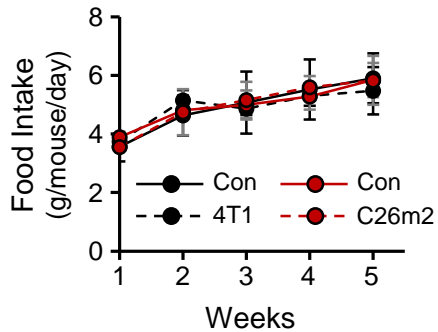

i

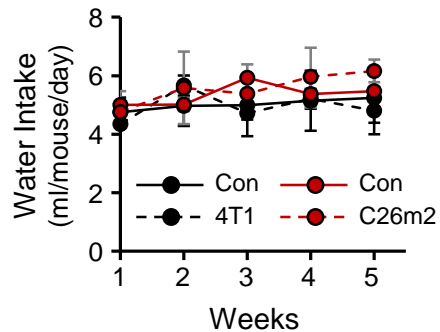

Supplementary Figure 2

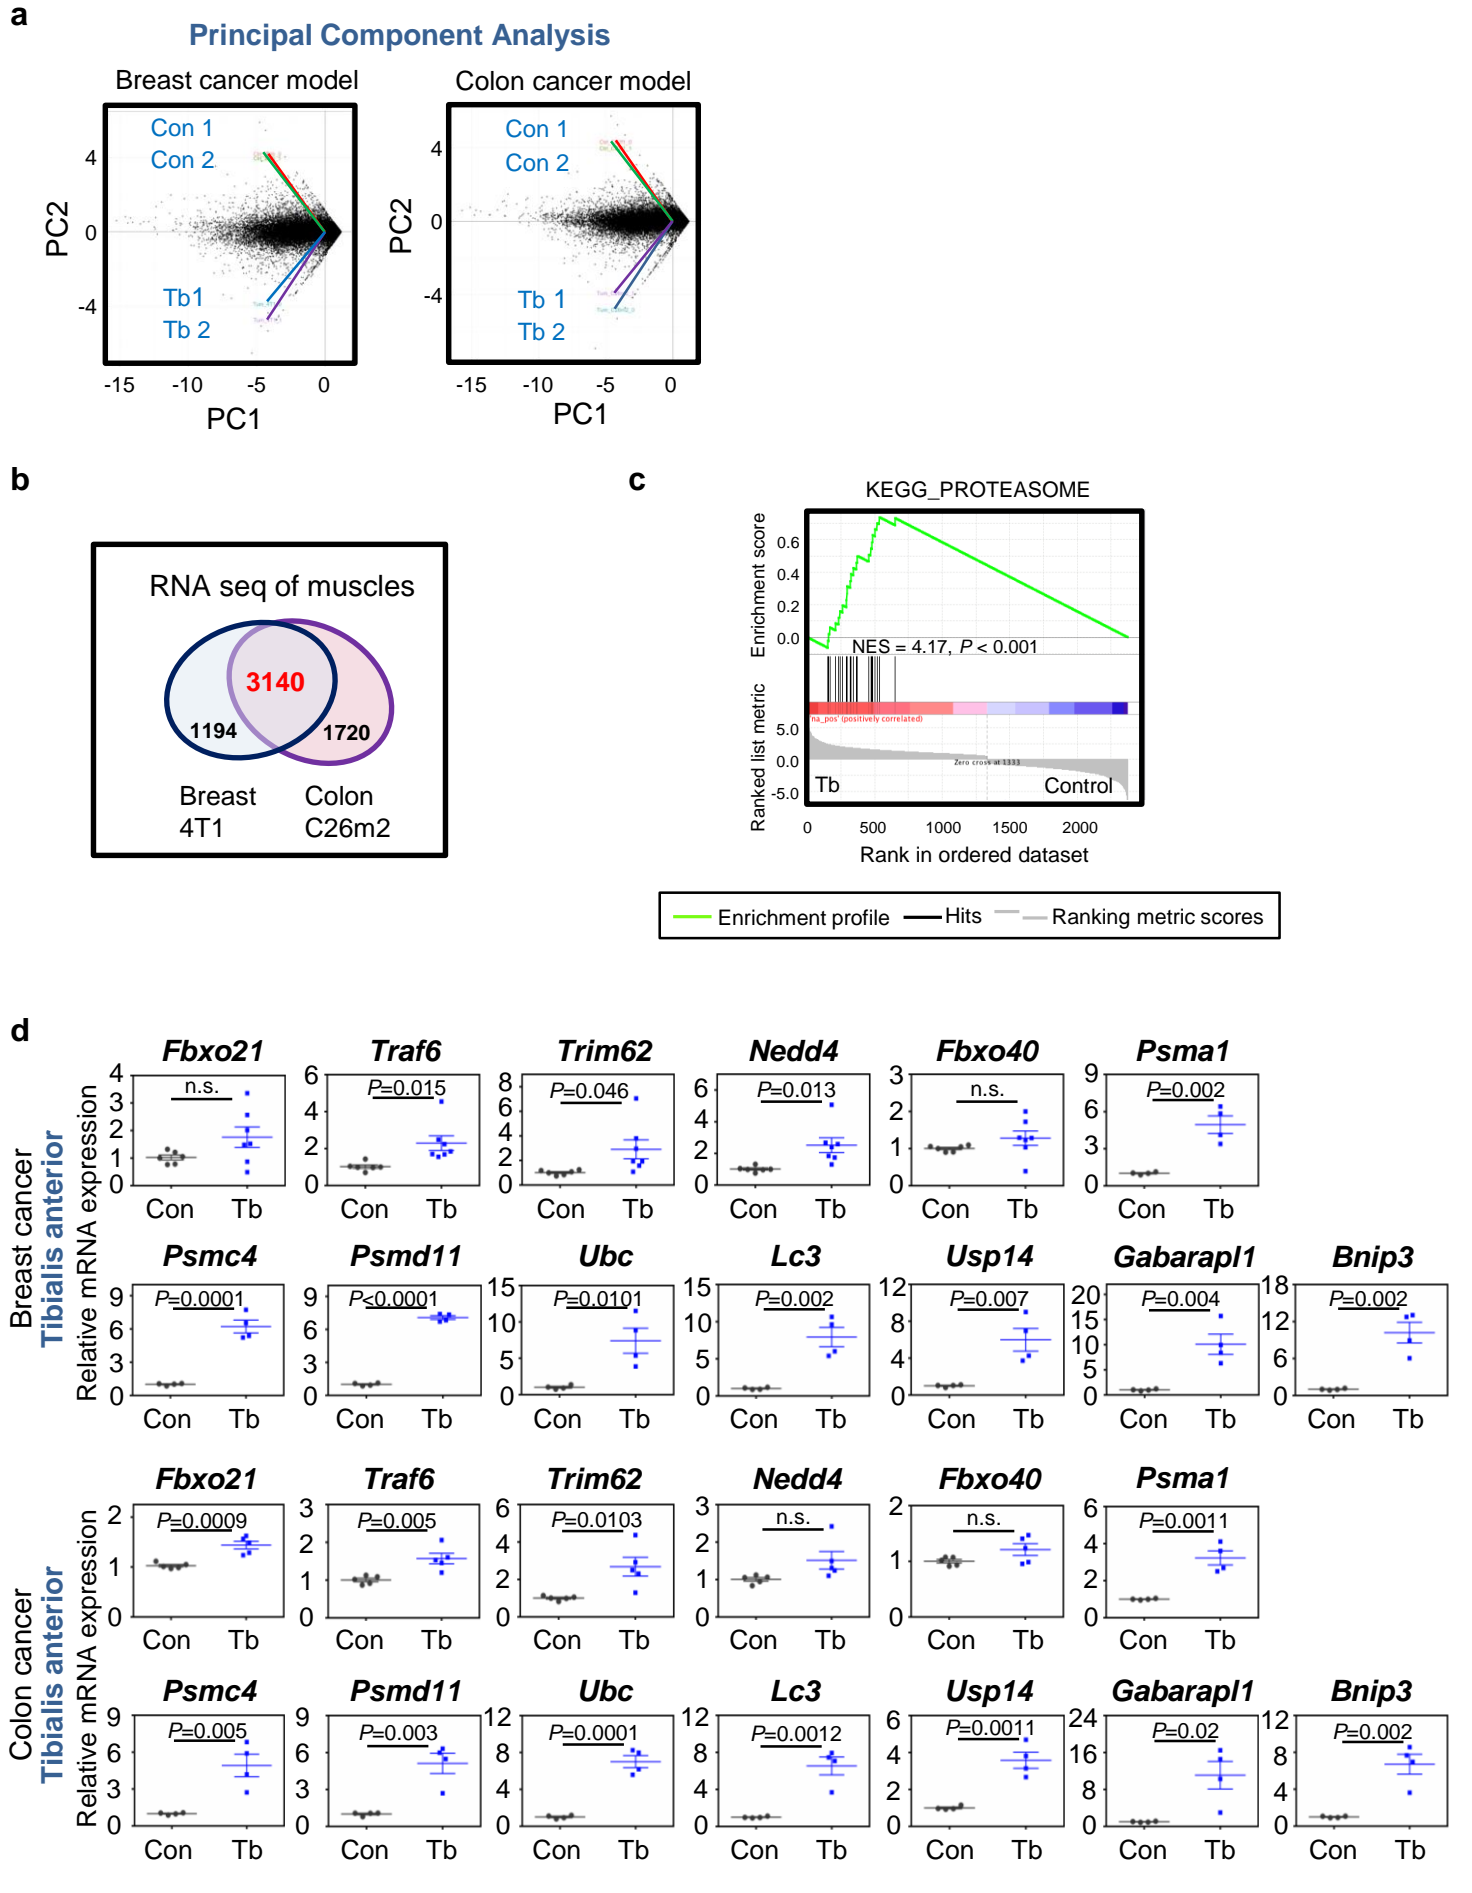

Supplementary Figure 2

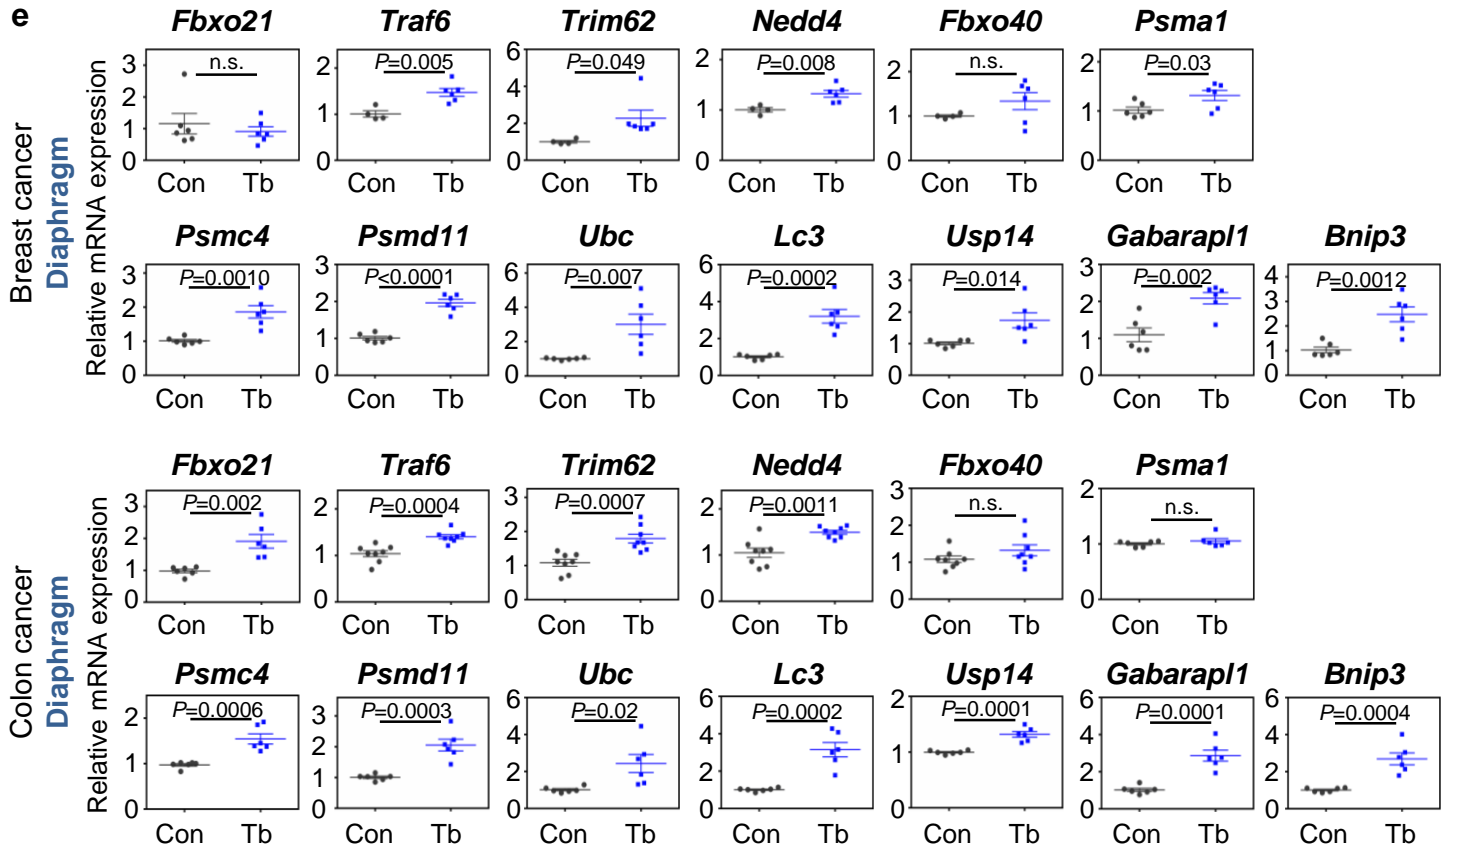

**f**

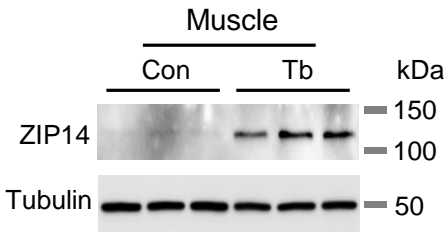

**g**

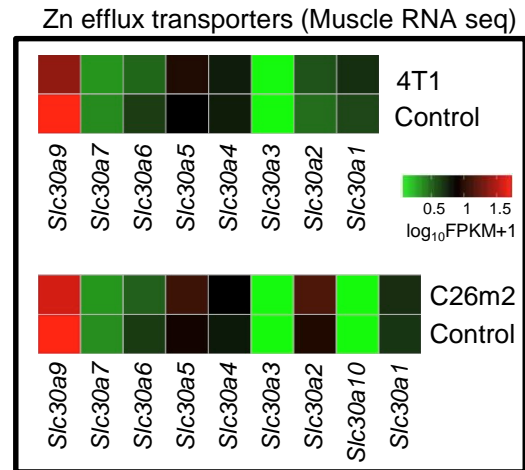

**h**

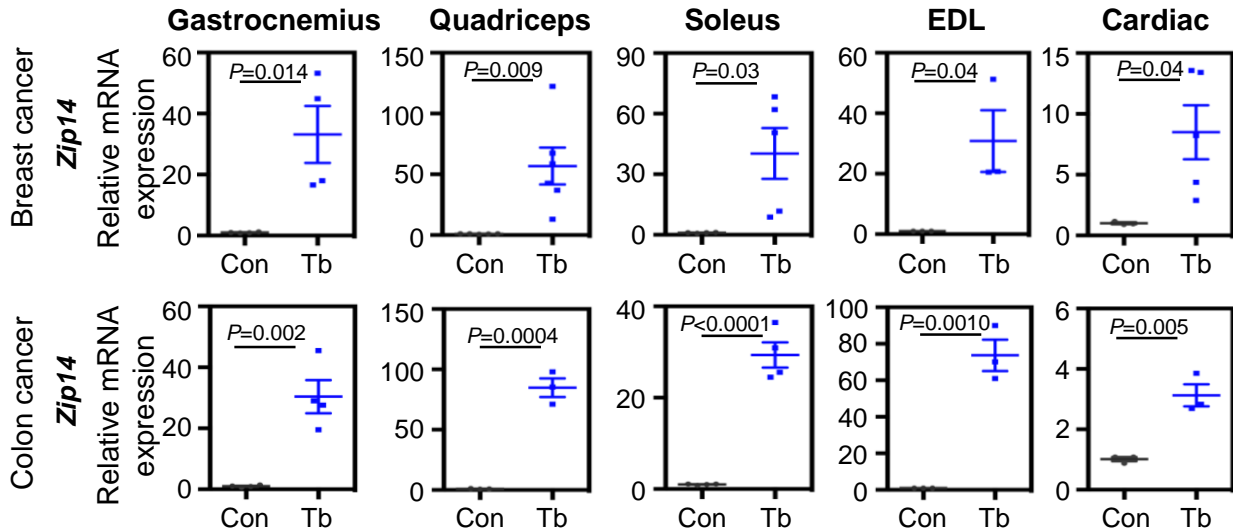

# Supplementary Figure 3

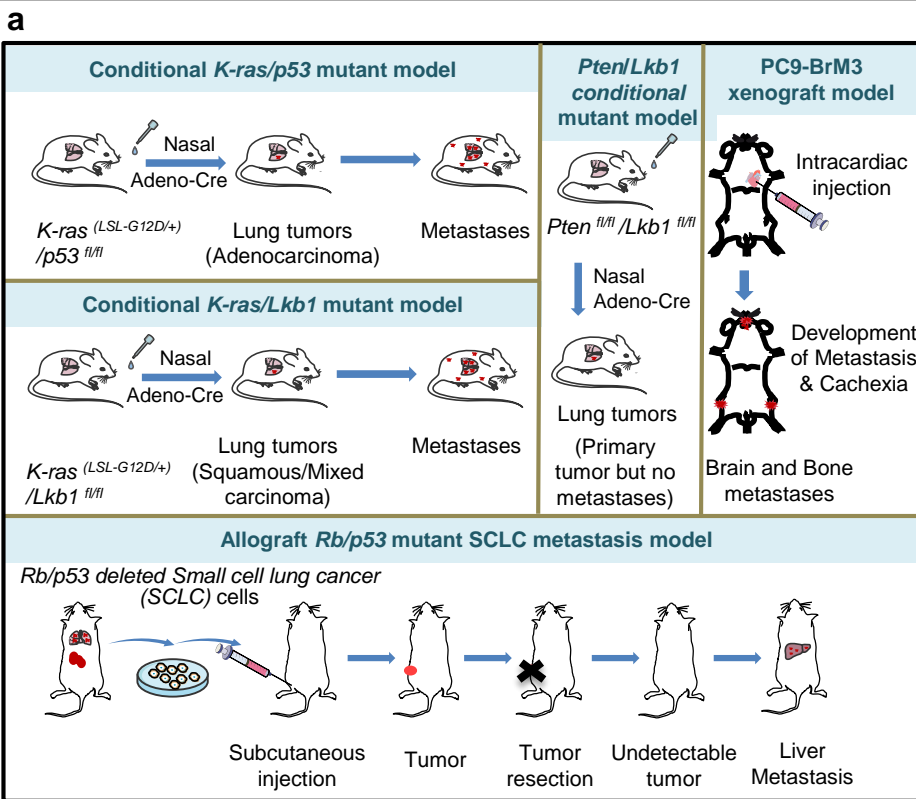

**f**

|                     |                                       |
|---------------------|---------------------------------------|
| MsZIP14 (aa243-278) | KQKNEHHHGHNHFTSETLPSKDKQEEGVTEKLLQNGD |
| HsZIP14 (aa246-281) | KQKNEHHHGHSHYASESLPSKDKQEEGVMEKLLQNGD |
|                     | *****.*::*:*****                      |
| MsZIP14 (aa279-314) | LDHMIPQHCNSELDGKAPGTDEKVIIVNSMSVQDLQA |
| HsZIP14 (aa282-317) | LDHMIPQHCSSSELDGKAPMVDEKVIIVGSLVQDLQA |
|                     | *****.******.*****.*:*****            |
| MsZIP14 (aa315-349) | SQSACYWLKGVRYSDIGTLAWMITLSDGLHNFIDG   |
| HsZIP14 (aa318-352) | SQSACYWLKGVRYSDIGTLAWMITLSDGLHNFIDG   |
|                     | *****                                 |

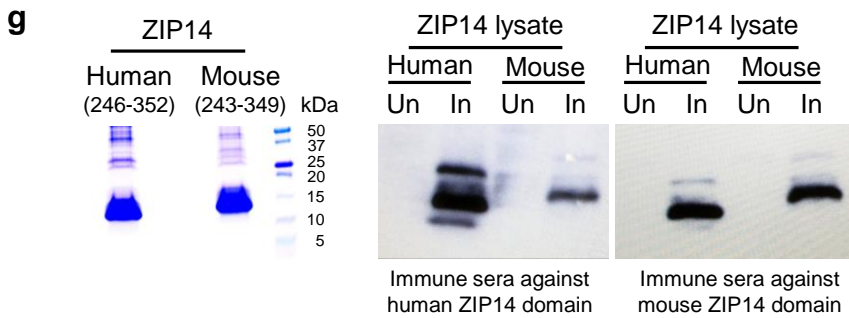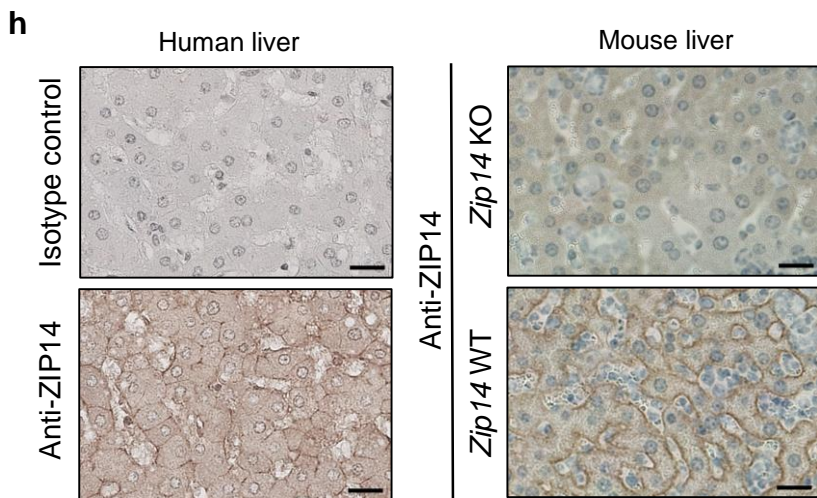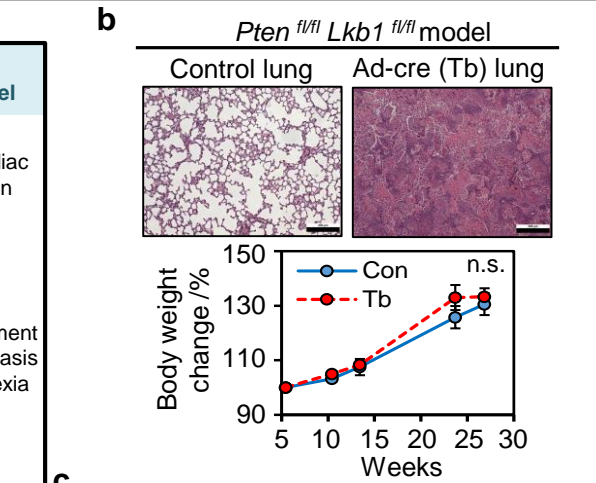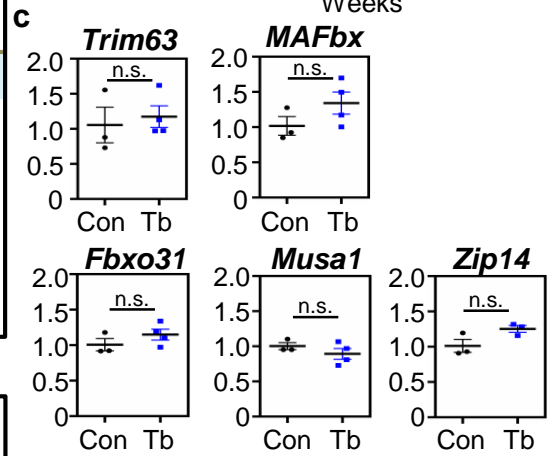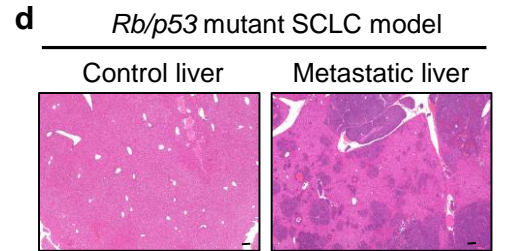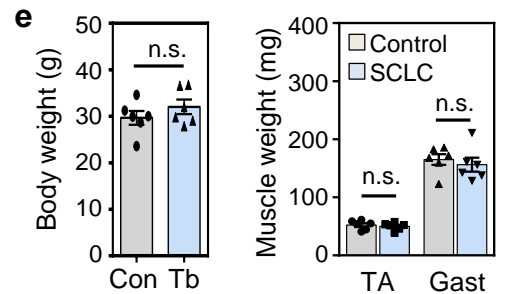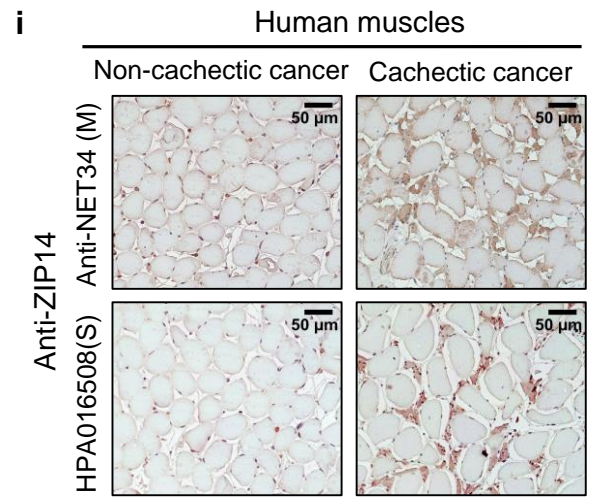

j

| Ingenuity (IPA) analysis |                    |
|--------------------------|--------------------|
| Top Upstream Regulators  |                    |
| Upstream Regulator       | p-value of overlap |
| Dexamethasone            | 1.14E-17           |
| PRKAG3                   | 2.34E-17           |
| Bortezomib               | 1.61E-15           |
| TNF                      | 3.70E-15           |
| TGFB1                    | 6.27E-15           |

k

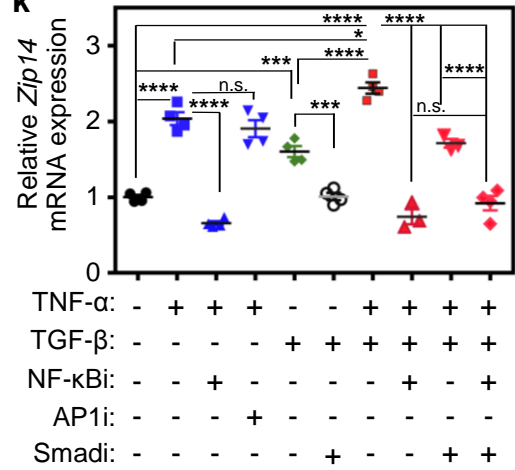

l

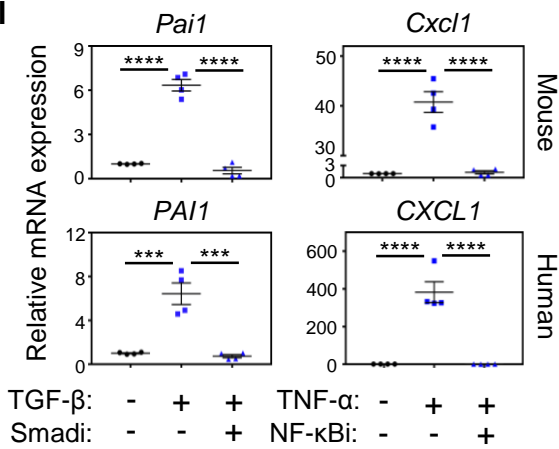

m

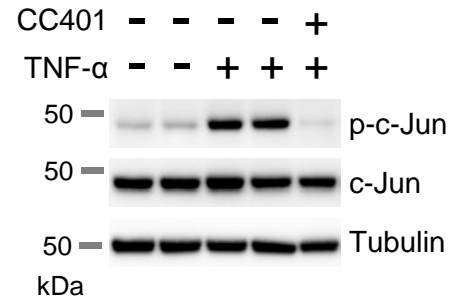

n

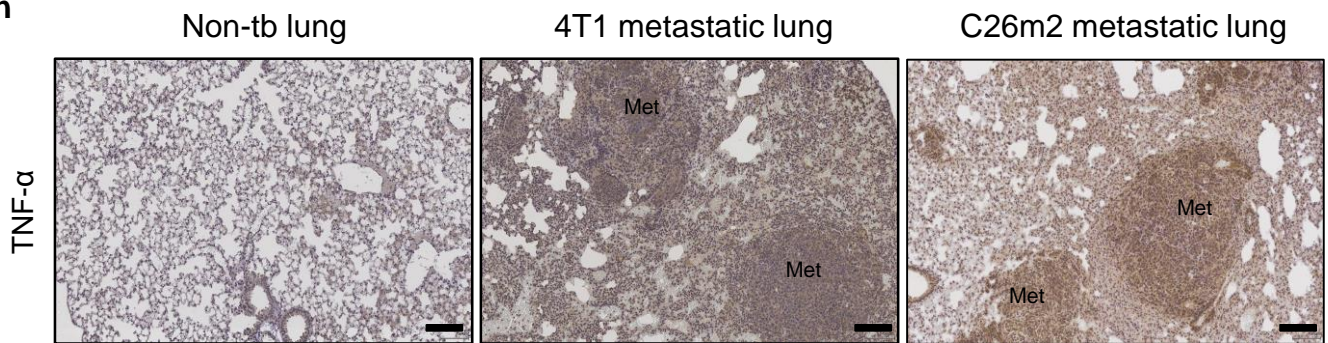

o

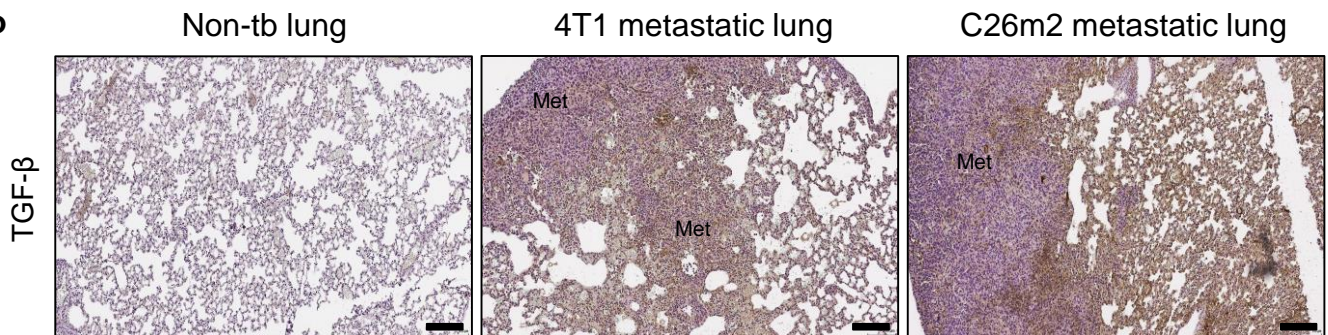

### Supplementary Figure 3

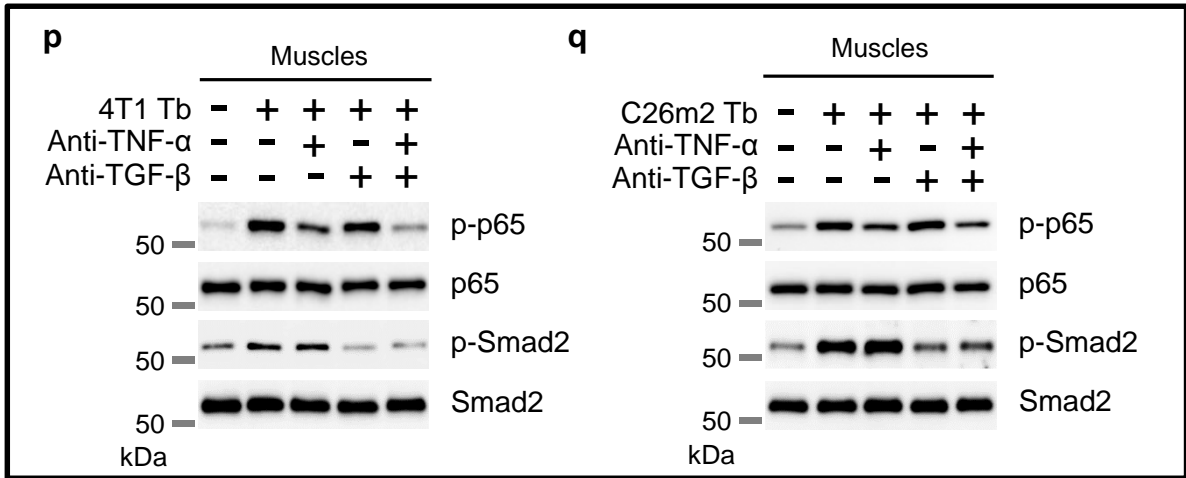

# Supplementary Figure 4

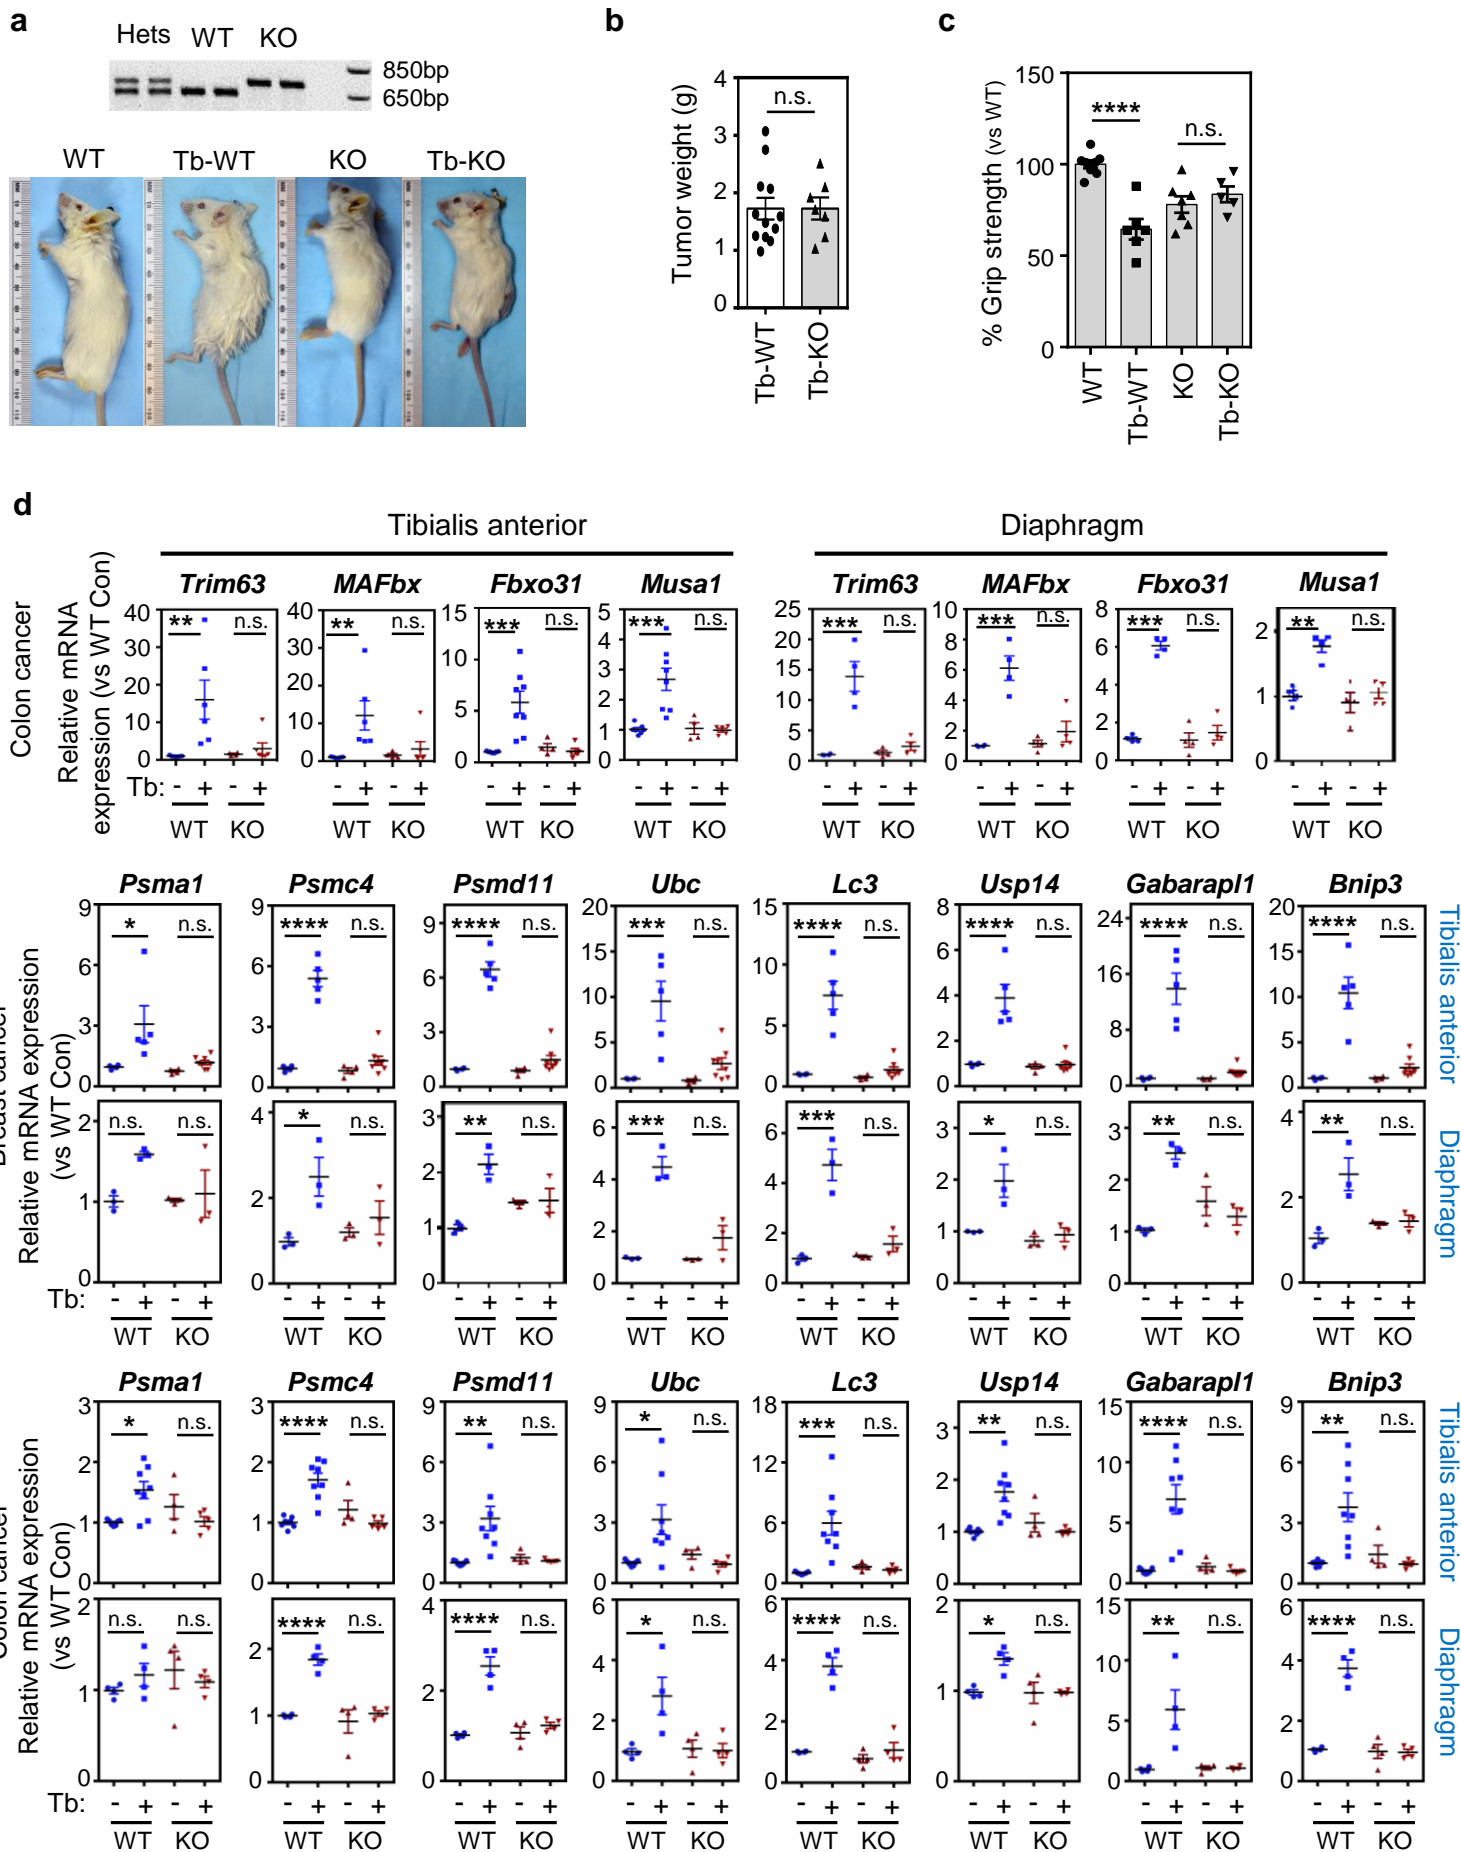



**Supplementary Figure 4**

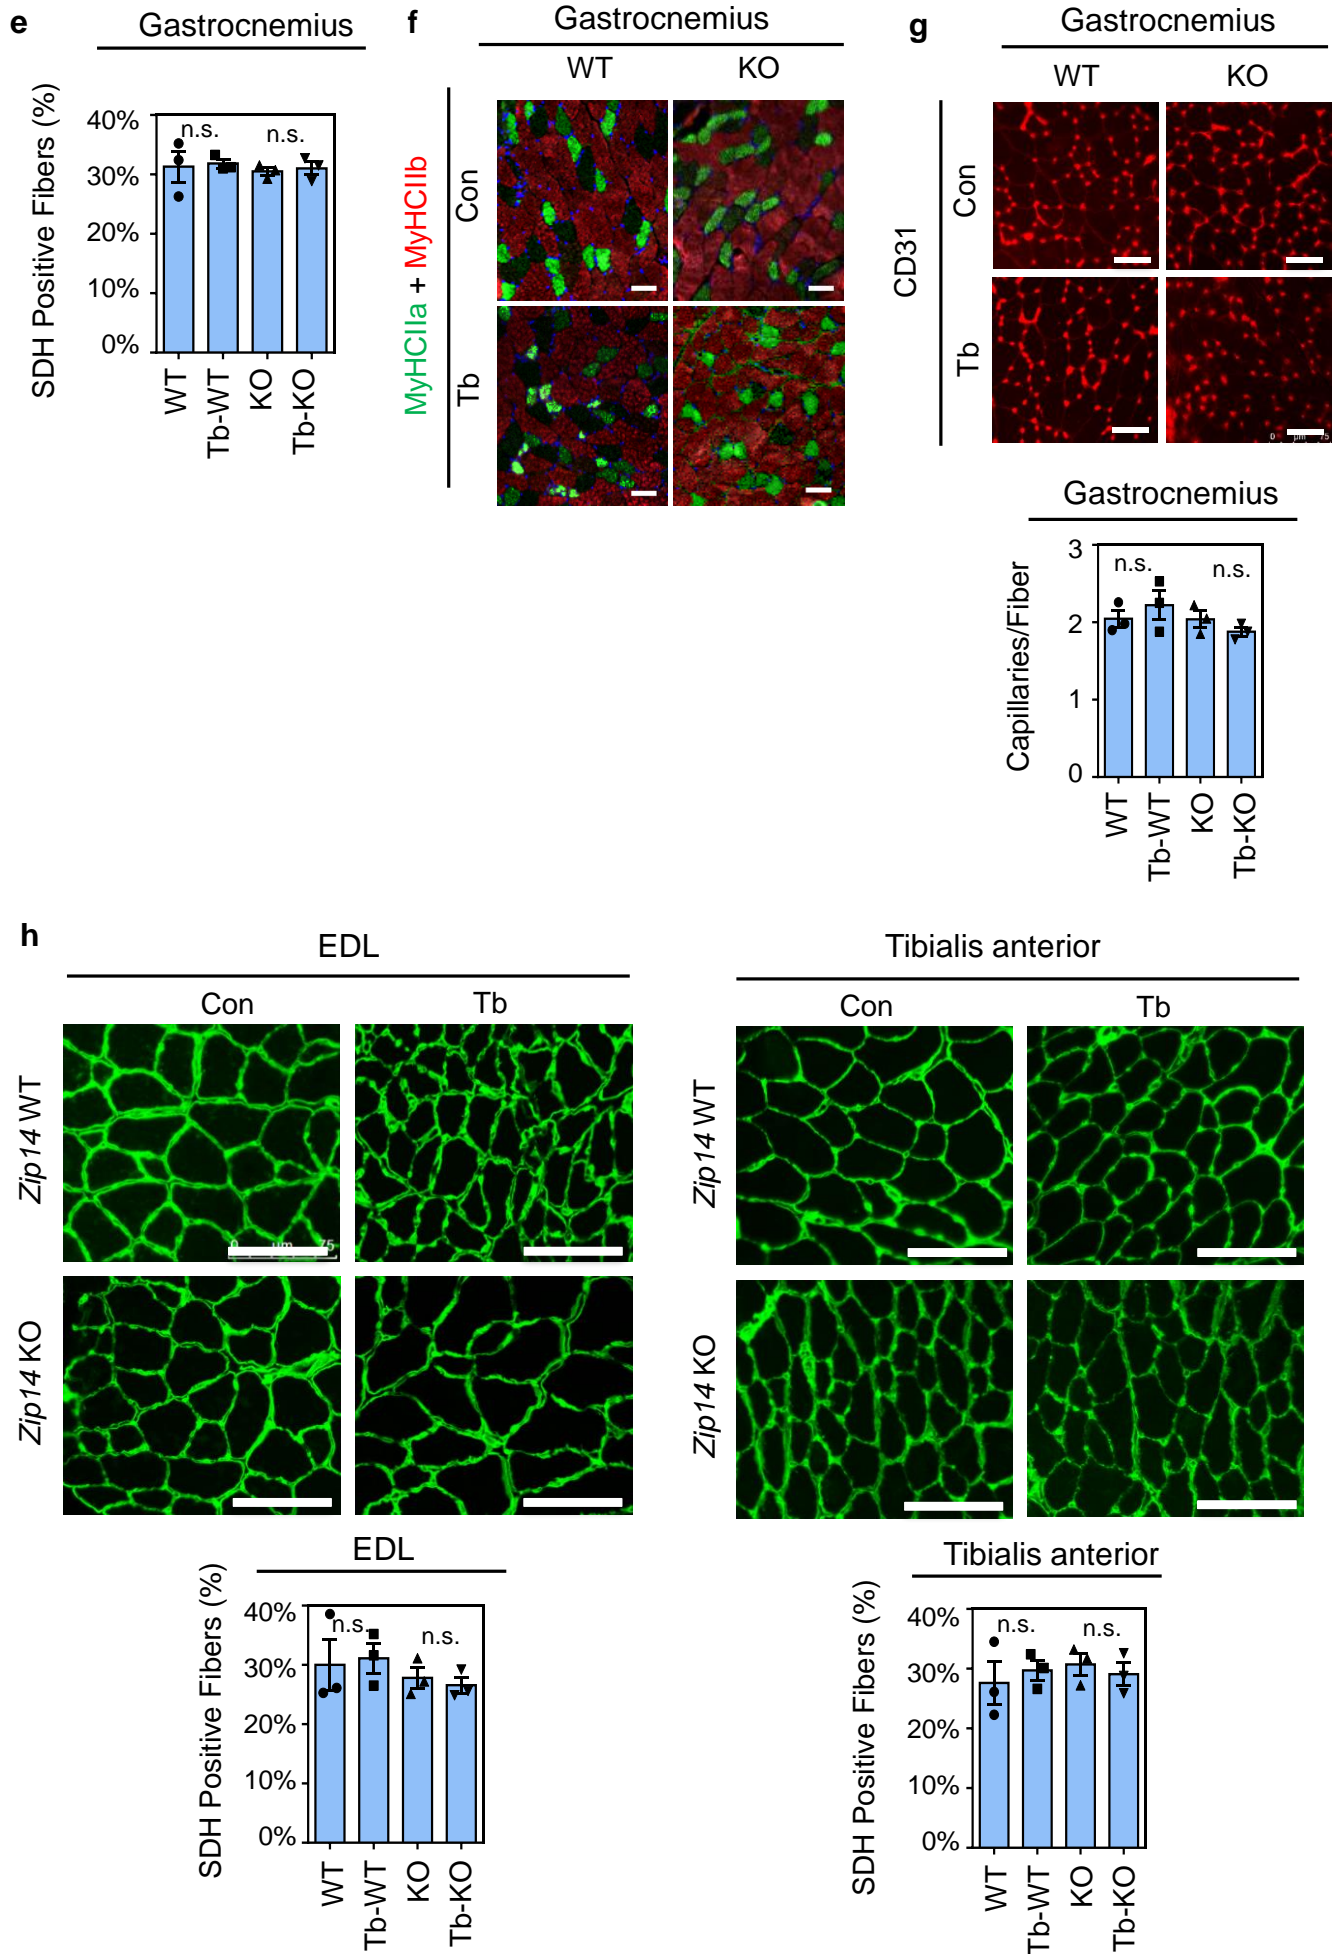

# Supplementary Figure 4

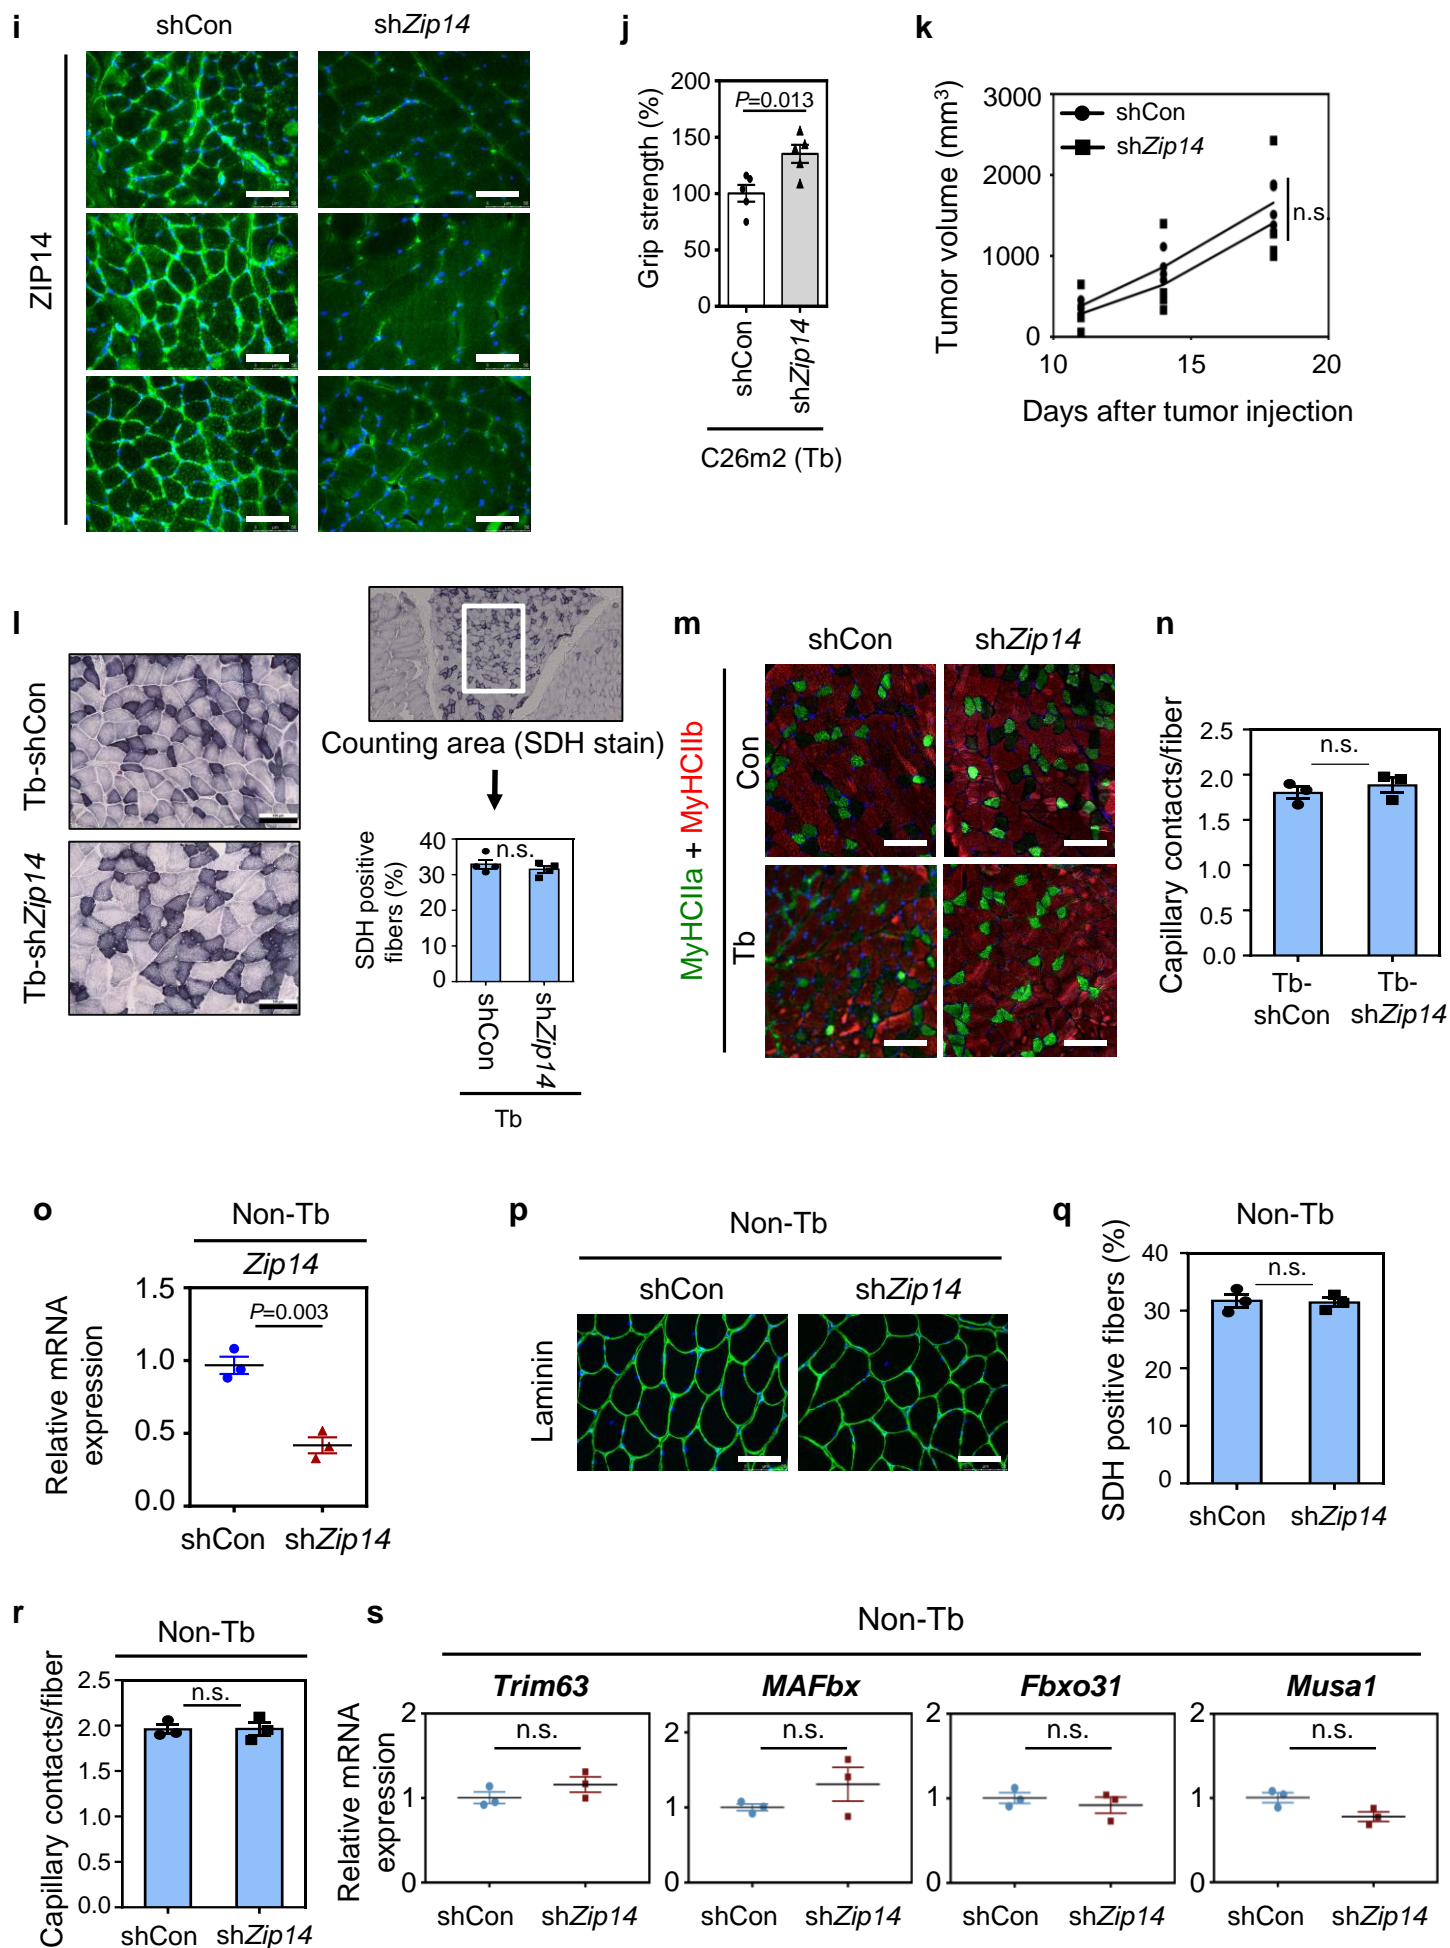

**Supplementary Figure 4**

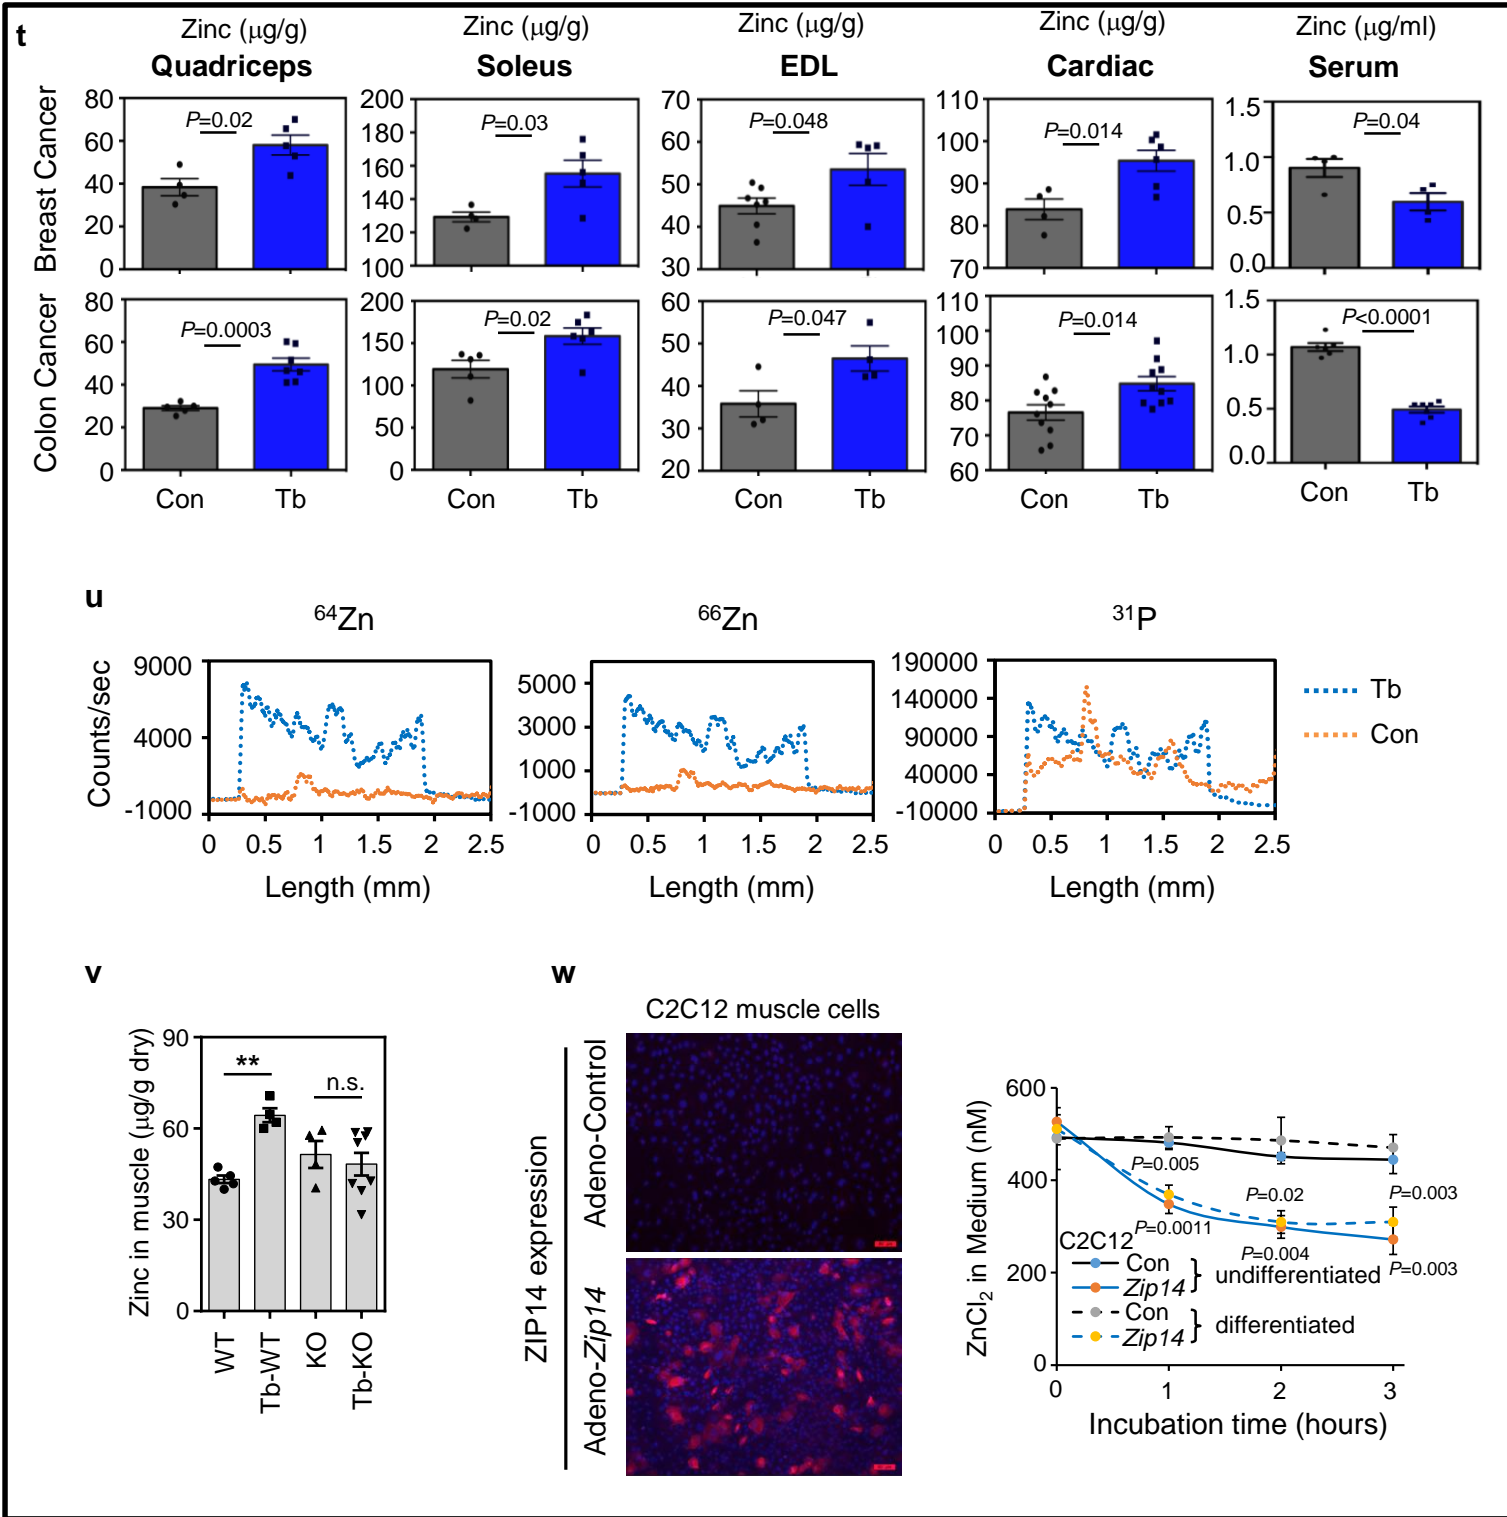

Supplementary Figure 4

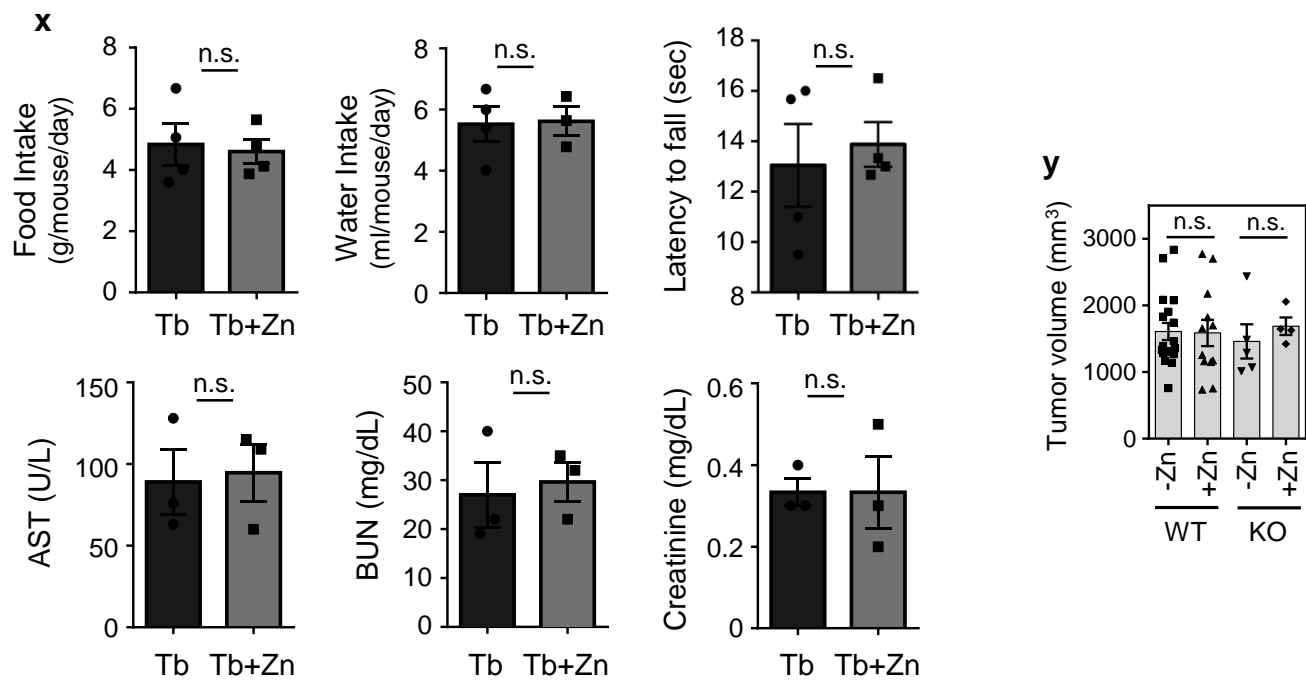

# Supplementary Figure 5

**a**

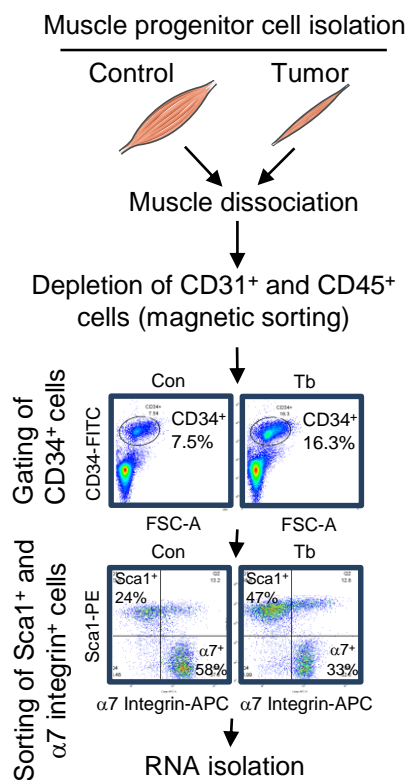

**b**

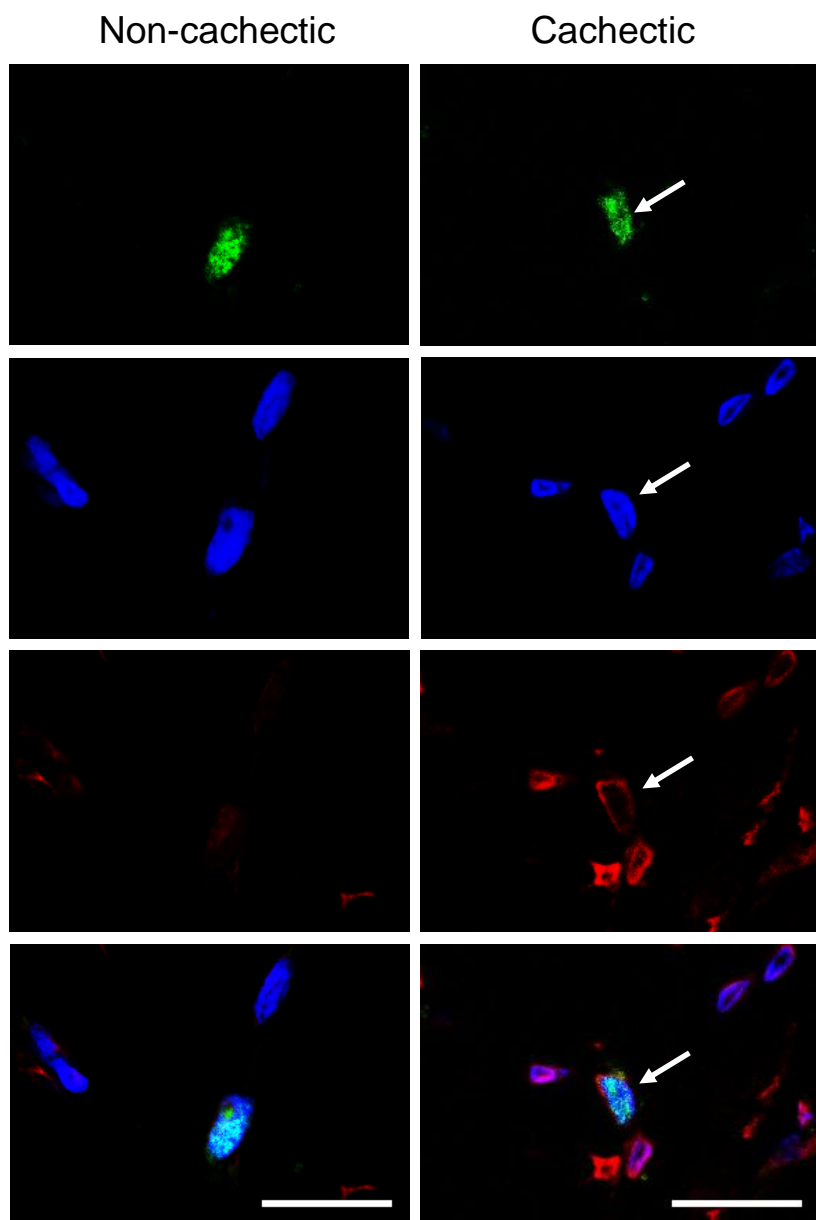

Supplementary Figure 5

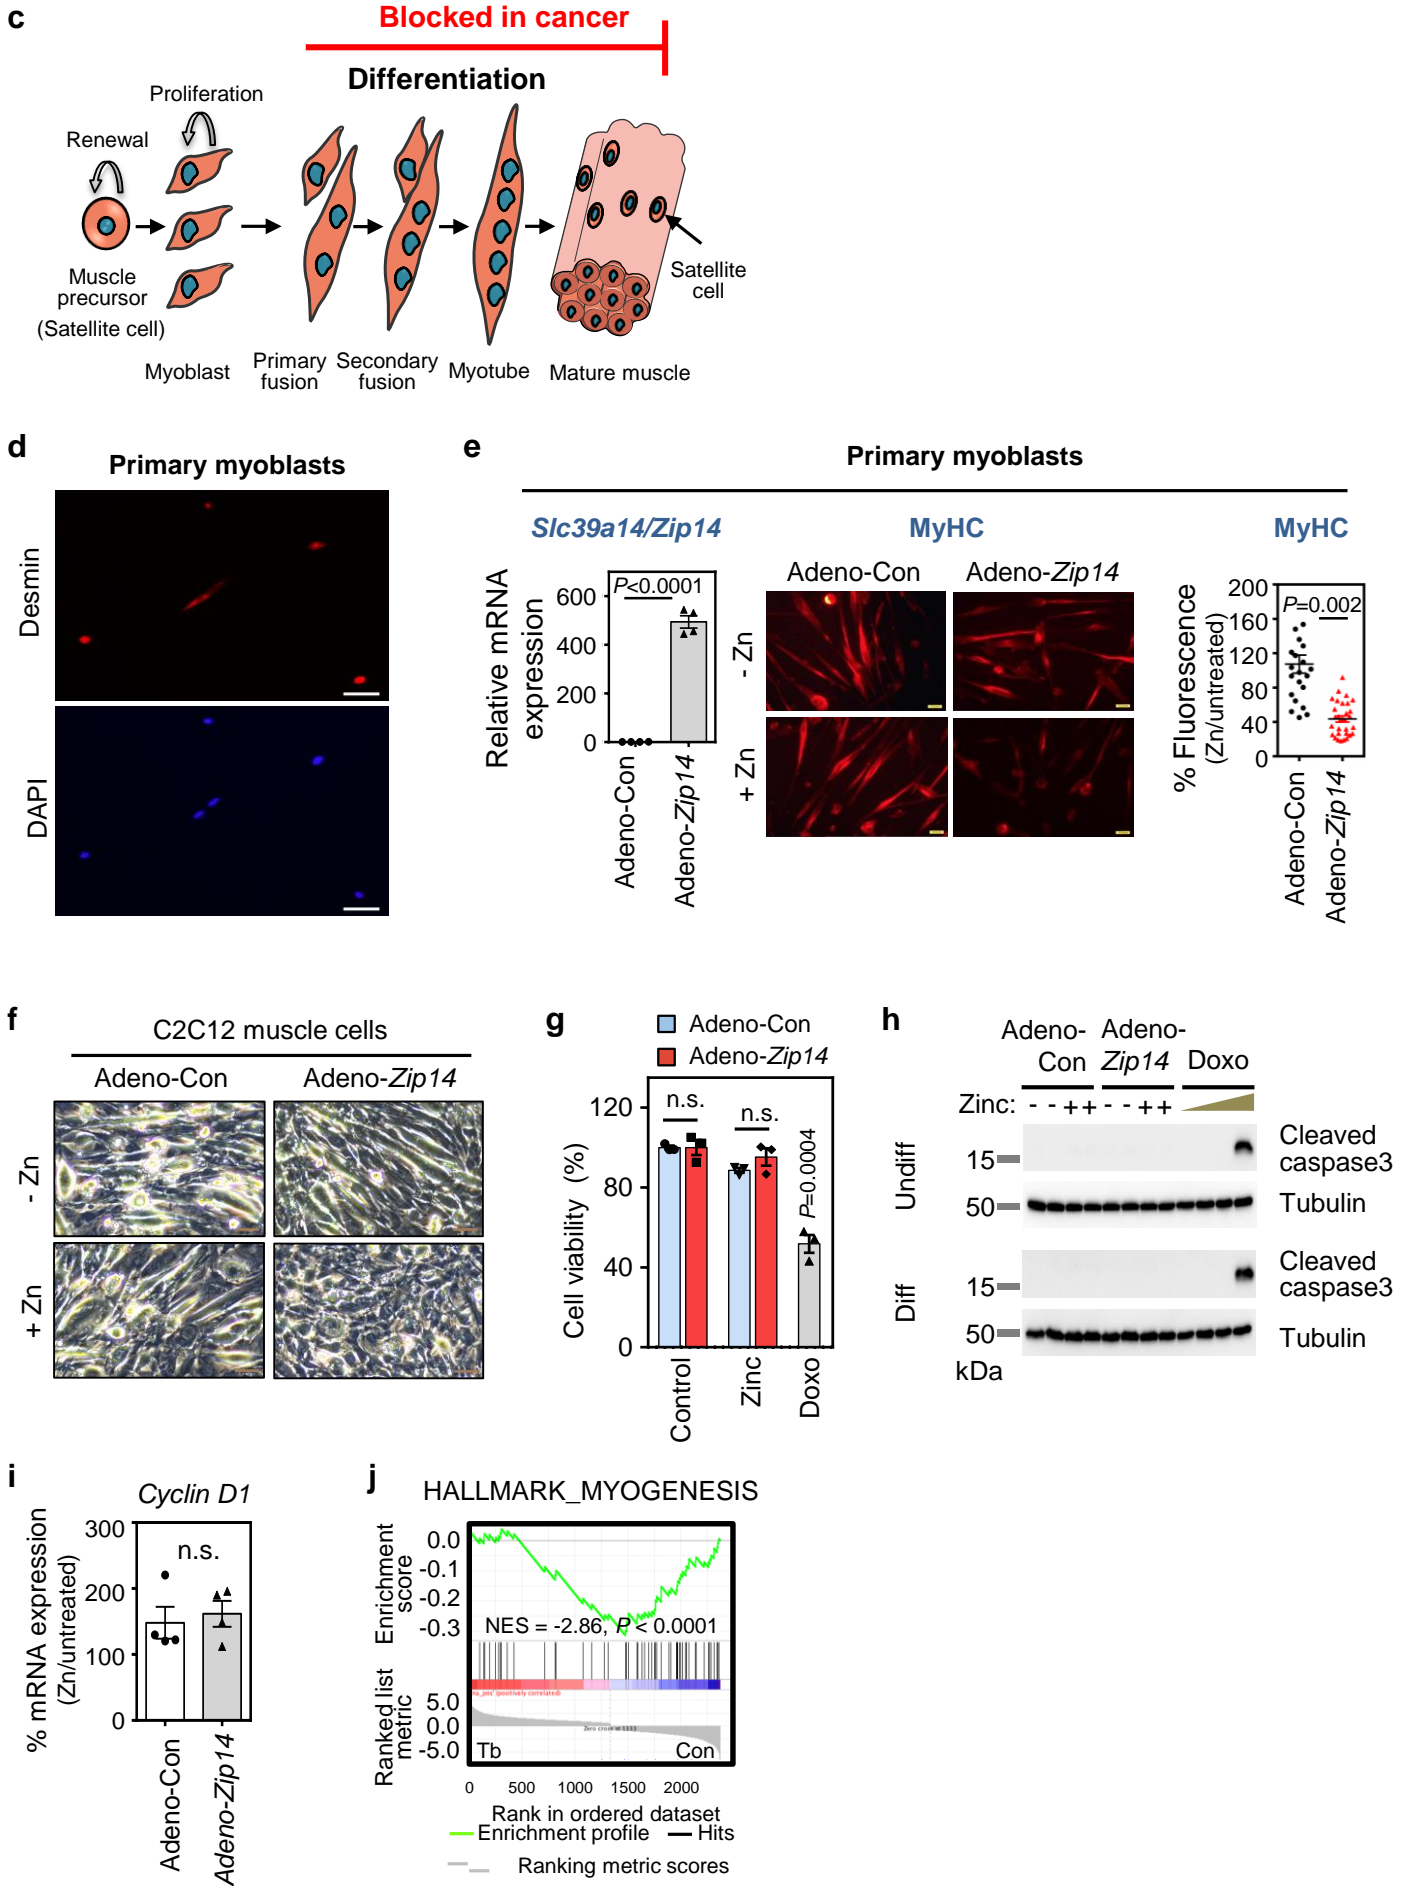

# Supplementary Figure 5

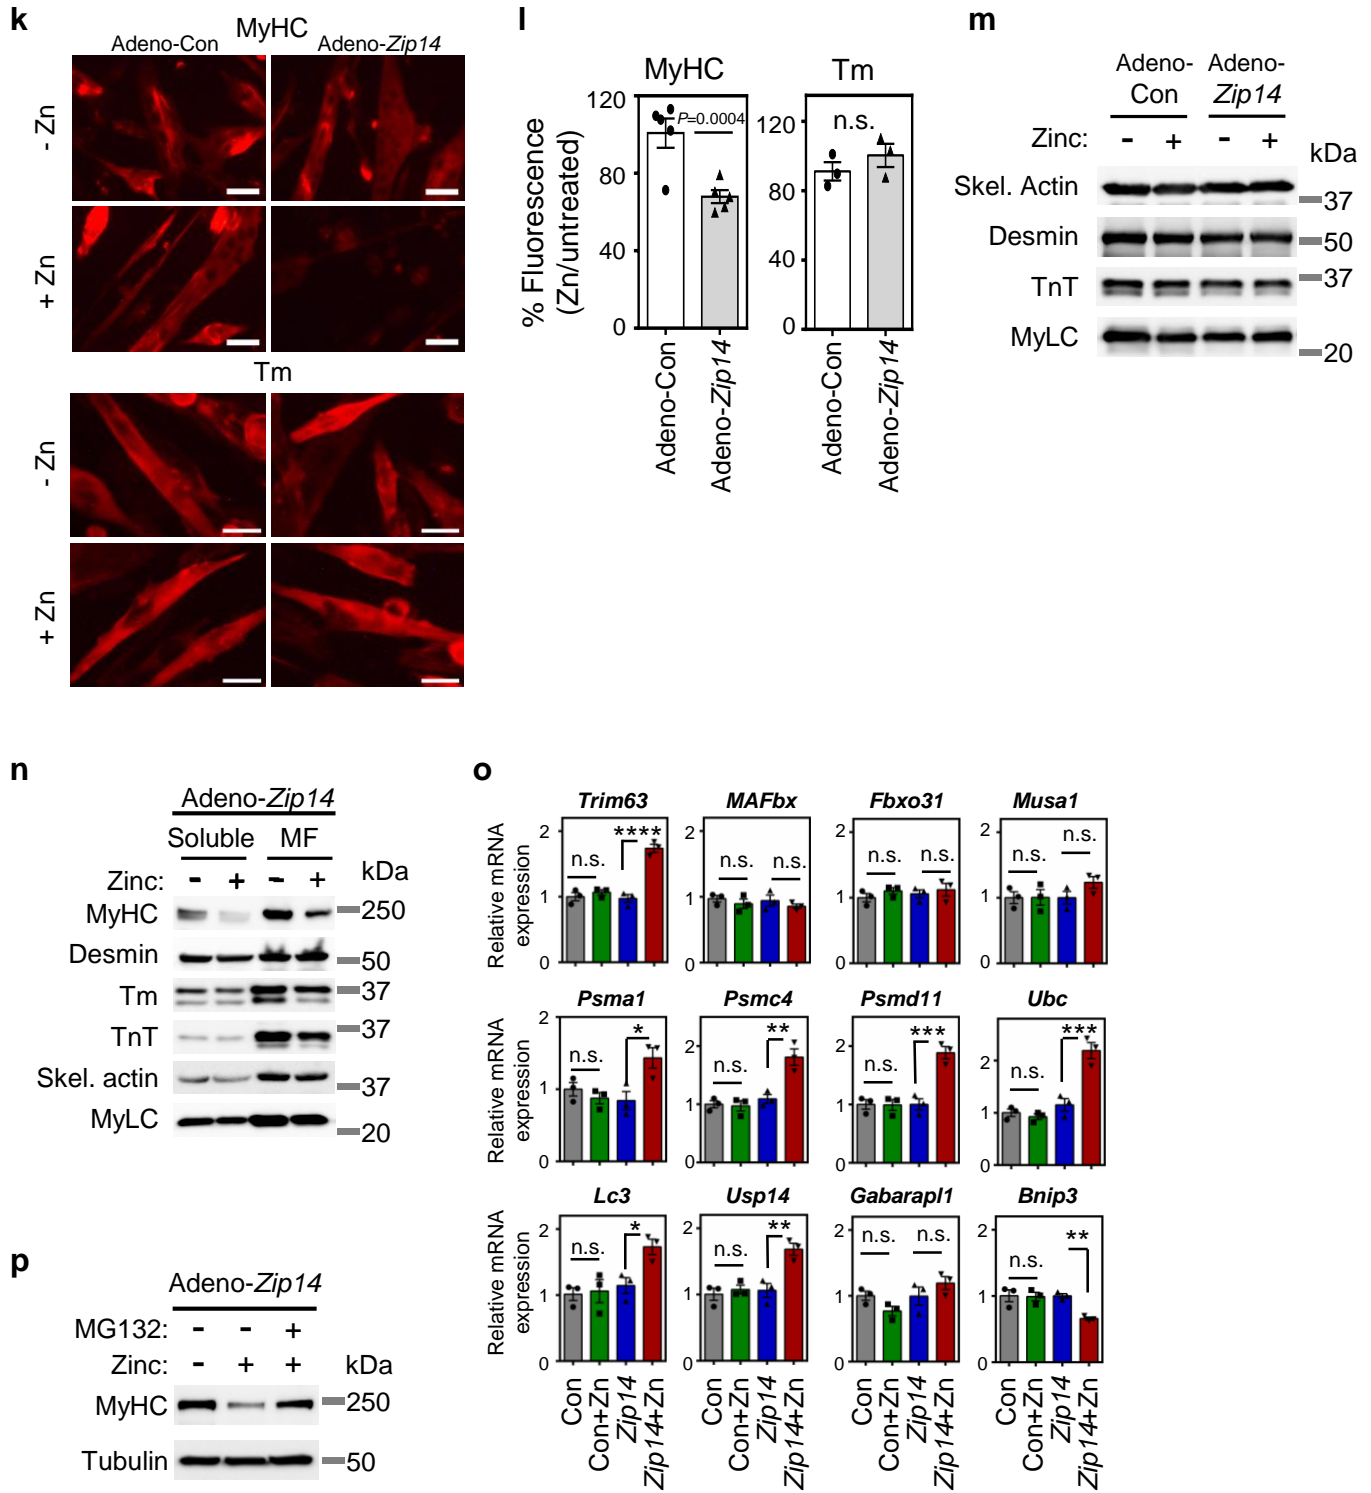

# Supplementary Figure 5

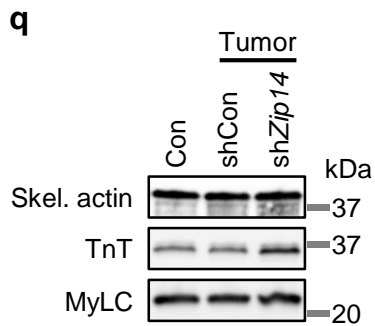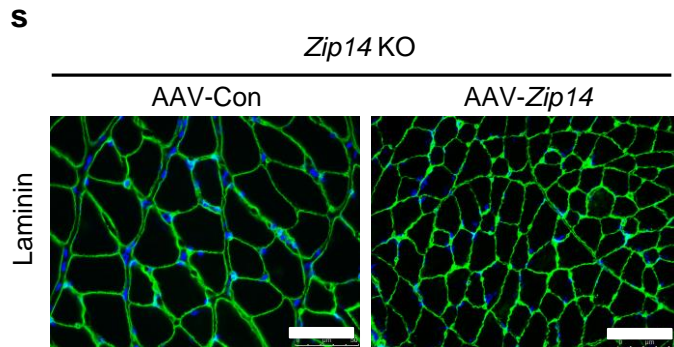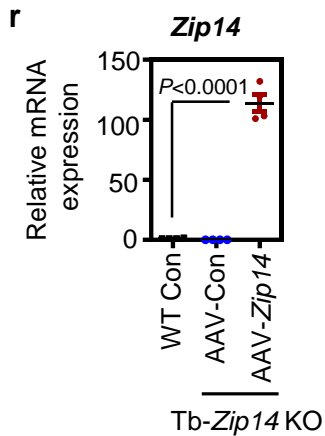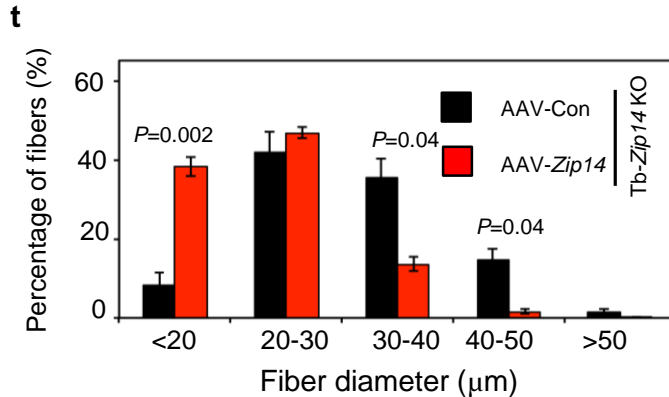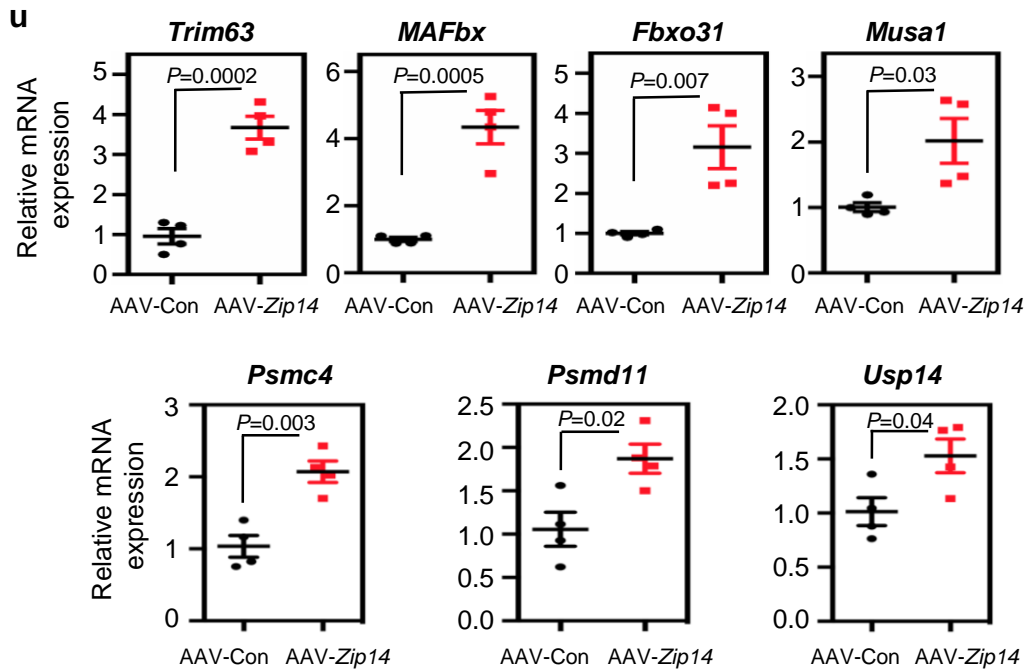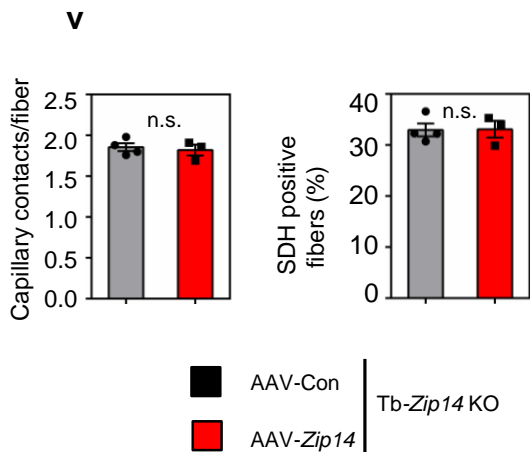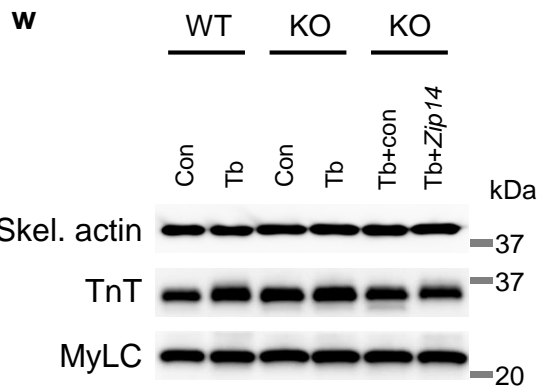



## Supplementary Figure 5

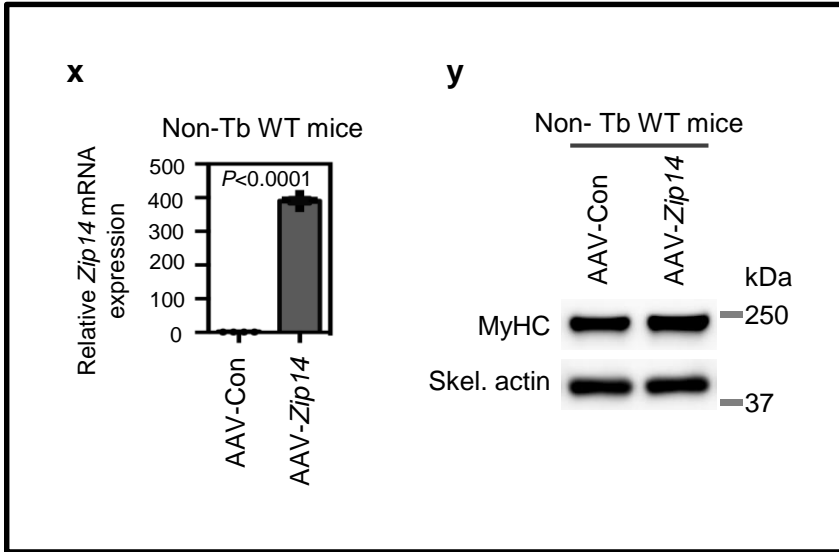

## Supplementary Figure 6

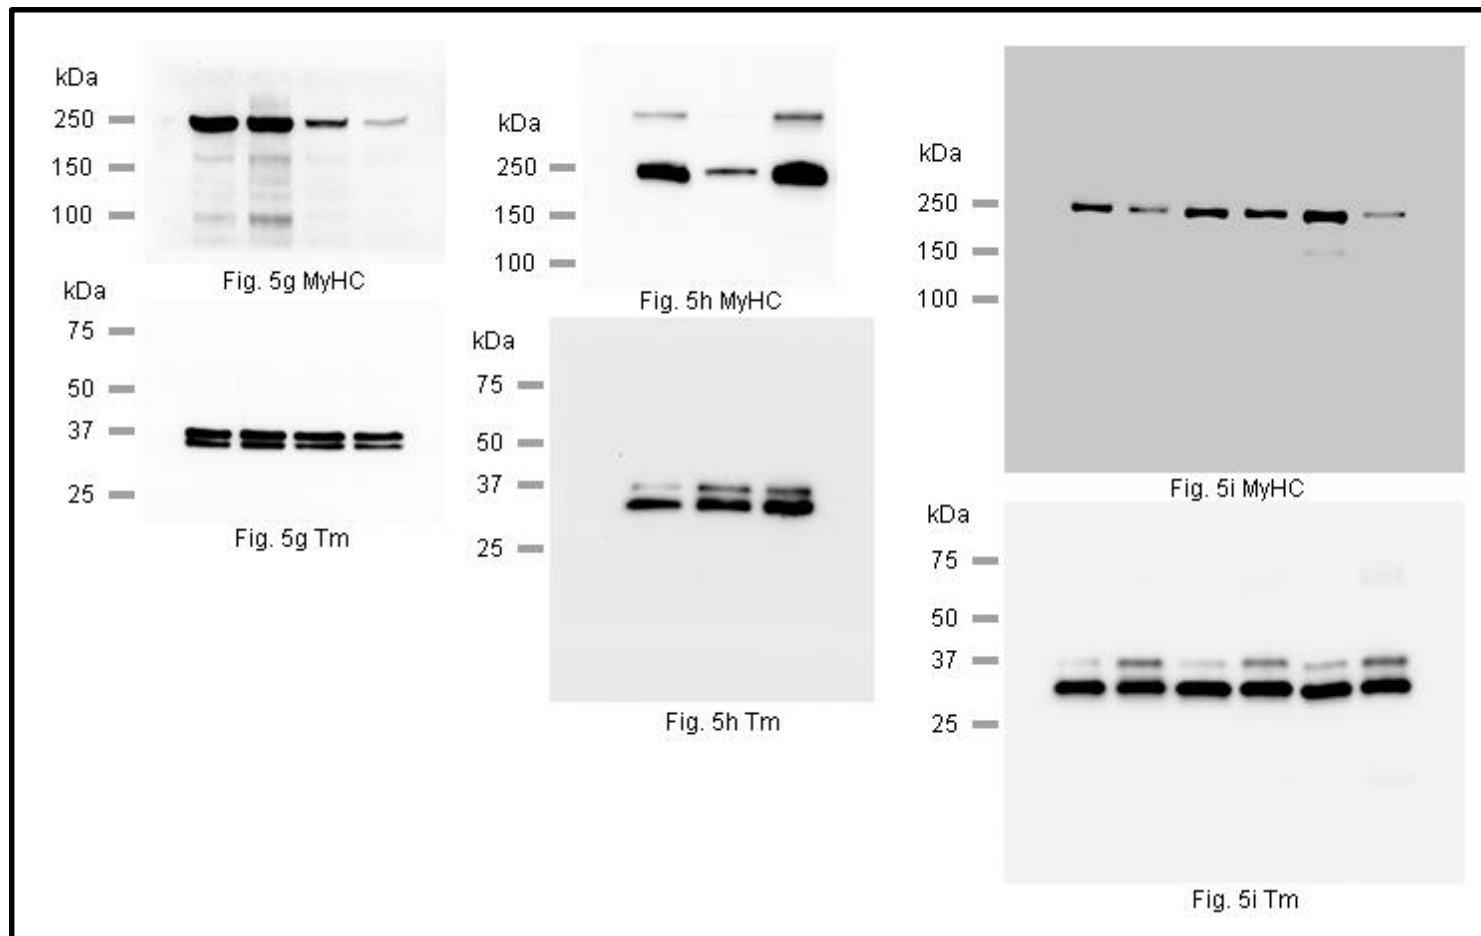

**Supplemental table 1: Differentially expressed genes between muscles from mice bearing C26m2 and 4T1 metastases or from non-tumor bearing control from transcriptomic analysis by RNA sequencing.** Common genes with significant p- and q-values (cutoff=0.05), sorted by decreasing log2 fold change of C26m2 are listed from RNA seq data (see Figure 2a-b). RNA-sequencing data is available in the Gene Expression Omnibus (GEO) with accession number GSE112204.

| Genes                | C26m2 model      |          |         | 4T1 model        |          |         |
|----------------------|------------------|----------|---------|------------------|----------|---------|
|                      | log2 fold change | p value  | q value | log2 fold change | p value  | q value |
| <b>Fam65c</b>        | 7.62578          | 5.00E-05 | 0.00032 | 4.54131          | 5.00E-05 | 0.00038 |
| <b>Mt2</b>           | 6.60907          | 5.00E-05 | 0.00032 | 7.06735          | 5.00E-05 | 0.00038 |
| <b>Doc2b</b>         | 6.37904          | 5.00E-05 | 0.00032 | 6.83145          | 5.00E-05 | 0.00038 |
| <b>Clnkb</b>         | 6.05644          | 0.01335  | 0.03852 | 3.34784          | 0.0018   | 0.00842 |
| <b>Acot1</b>         | 5.93372          | 5.00E-05 | 0.00032 | 6.5275           | 5.00E-05 | 0.00038 |
| <b>Armc2</b>         | 5.89909          | 0.00095  | 0.00425 | 2.85873          | 0.00015  | 0.00102 |
| <b>Mt1</b>           | 5.82281          | 5.00E-05 | 0.00032 | 6.63242          | 5.00E-05 | 0.00038 |
| <b>Il6ra</b>         | 5.28983          | 5.00E-05 | 0.00032 | 5.59273          | 5.00E-05 | 0.00038 |
| <b>Slc39a14</b>      | 5.26324          | 5.00E-05 | 0.00032 | 4.97143          | 5.00E-05 | 0.00038 |
| <b>Ampd3</b>         | 5.1855           | 5.00E-05 | 0.00032 | 5.59895          | 5.00E-05 | 0.00038 |
| <b>8430408G22Rik</b> | 5.14799          | 5.00E-05 | 0.00032 | 6.27522          | 5.00E-05 | 0.00038 |
| <b>Cbx8</b>          | 5.06976          | 1.00E-04 | 0.0006  | -5.9708          | 5.00E-05 | 0.00038 |
| <b>Cdkn1a</b>        | 5.00789          | 5.00E-05 | 0.00032 | 3.76426          | 5.00E-05 | 0.00038 |
| <b>Pnmt</b>          | 4.96775          | 5.00E-05 | 0.00032 | 3.77925          | 5.00E-05 | 0.00038 |
| <b>Fah</b>           | 4.95461          | 5.00E-05 | 0.00032 | 5.13093          | 5.00E-05 | 0.00038 |
| <b>Serpine1</b>      | 4.9095           | 5.00E-05 | 0.00032 | 2.36004          | 5.00E-05 | 0.00038 |
| <b>Ddit4</b>         | 4.84367          | 5.00E-05 | 0.00032 | 5.22706          | 5.00E-05 | 0.00038 |
| <b>2410006H16Rik</b> | 4.74236          | 5.00E-05 | 0.00032 | 5.95773          | 5.00E-05 | 0.00038 |
| <b>Trim63</b>        | 4.72891          | 5.00E-05 | 0.00032 | 4.57203          | 5.00E-05 | 0.00038 |
| <b>Serpina3n</b>     | 4.69669          | 5.00E-05 | 0.00032 | 4.06373          | 5.00E-05 | 0.00038 |
| <b>Wdr62</b>         | 4.59427          | 5.00E-05 | 0.00032 | 5.62127          | 5.00E-05 | 0.00038 |
| <b>Maff</b>          | 4.58787          | 5.00E-05 | 0.00032 | 6.00904          | 5.00E-05 | 0.00038 |
| <b>Sesn1</b>         | 4.54081          | 5.00E-05 | 0.00032 | 4.32566          | 5.00E-05 | 0.00038 |
| <b>Tmem82</b>        | 4.53145          | 5.00E-05 | 0.00032 | 3.27844          | 5.00E-05 | 0.00038 |
| <b>Inhbb</b>         | 4.47969          | 5.00E-05 | 0.00032 | 2.41203          | 5.00E-05 | 0.00038 |
| <b>Fkbp5</b>         | 4.43001          | 5.00E-05 | 0.00032 | 3.68796          | 5.00E-05 | 0.00038 |
| <b>Fam134b</b>       | 4.42913          | 5.00E-05 | 0.00032 | 4.52806          | 5.00E-05 | 0.00038 |
| <b>Acss1</b>         | 4.34291          | 5.00E-05 | 0.00032 | 4.63063          | 5.00E-05 | 0.00038 |
| <b>Gdf5</b>          | 4.34057          | 0.00115  | 0.005   | 3.99017          | 5.00E-05 | 0.00038 |
| <b>Lcn2</b>          | 4.33243          | 5.00E-05 | 0.00032 | 6.73825          | 5.00E-05 | 0.00038 |
| <b>Wbscr27</b>       | 4.31509          | 5.00E-05 | 0.00032 | 2.41112          | 0.0014   | 0.00681 |
| <b>Sphk1</b>         | 4.27919          | 5.00E-05 | 0.00032 | 3.41545          | 5.00E-05 | 0.00038 |
| <b>Ggn</b>           | 4.23835          | 3.00E-04 | 0.00158 | 3.94397          | 0.00715  | 0.02598 |
| <b>Sik1</b>          | 4.2175           | 5.00E-05 | 0.00032 | 5.08018          | 5.00E-05 | 0.00038 |

|                      |         |          |         |         |          |         |
|----------------------|---------|----------|---------|---------|----------|---------|
| <b>Adamts2</b>       | 4.17393 | 5.00E-05 | 0.00032 | 4.29205 | 5.00E-05 | 0.00038 |
| <b>Cebpd</b>         | 4.15688 | 5.00E-05 | 0.00032 | 4.55169 | 5.00E-05 | 0.00038 |
| <b>Map3k6</b>        | 4.15607 | 5.00E-05 | 0.00032 | 5.66728 | 5.00E-05 | 0.00038 |
| <b>Gm11827</b>       | 4.13967 | 5.00E-05 | 0.00032 | 4.22723 | 5.00E-05 | 0.00038 |
| <b>Spsb1</b>         | 4.07632 | 5.00E-05 | 0.00032 | 4.28801 | 5.00E-05 | 0.00038 |
| <b>Stc1</b>          | 4.0562  | 3.00E-04 | 0.00158 | 2.43903 | 5.00E-05 | 0.00038 |
| <b>Ctsl</b>          | 3.97948 | 5.00E-05 | 0.00032 | 4.25205 | 5.00E-05 | 0.00038 |
| <b>Fbxo32</b>        | 3.9738  | 5.00E-05 | 0.00032 | 4.23441 | 5.00E-05 | 0.00038 |
| <b>2310008H04Rik</b> | 3.79733 | 5.00E-05 | 0.00032 | 4.64727 | 5.00E-05 | 0.00038 |
| <b>Zap70</b>         | 3.76607 | 0.0141   | 0.04025 | 3.55426 | 0.00015  | 0.00102 |
| <b>Osbp2</b>         | 3.74005 | 5.00E-05 | 0.00032 | 5.34914 | 5.00E-05 | 0.00038 |
| <b>Aacs</b>          | 3.72422 | 5.00E-05 | 0.00032 | 2.95983 | 5.00E-05 | 0.00038 |
| <b>D230025D16Rik</b> | 3.71236 | 5.00E-05 | 0.00032 | 4.12116 | 5.00E-05 | 0.00038 |
| <b>Eif4ebp1</b>      | 3.67998 | 5.00E-05 | 0.00032 | 3.87891 | 5.00E-05 | 0.00038 |
| <b>E230001N04Rik</b> | 3.66771 | 5.00E-05 | 0.00032 | 2.43134 | 1.00E-04 | 0.00072 |
| <b>Gm3129</b>        | 3.64779 | 0.00955  | 0.02937 | 2.24603 | 5.00E-05 | 0.00038 |
| <b>Cnksr1</b>        | 3.64586 | 5.00E-05 | 0.00032 | 3.69211 | 5.00E-05 | 0.00038 |
| <b>S100a8</b>        | 3.63757 | 5.00E-05 | 0.00032 | 11.0028 | 0.0103   | 0.03481 |
| <b>Gm6907</b>        | 3.63705 | 5.00E-05 | 0.00032 | 3.35974 | 5.00E-05 | 0.00038 |
| <b>D17H6S56E-5</b>   | 3.62397 | 0.0016   | 0.00663 | 3.50525 | 0.01145  | 0.03798 |
| <b>Arhgap26</b>      | 3.6051  | 5.00E-05 | 0.00032 | 3.00607 | 5.00E-05 | 0.00038 |
| <b>Lrrc58</b>        | 3.6008  | 5.00E-05 | 0.00032 | 3.49342 | 5.00E-05 | 0.00038 |
| <b>Arl4d</b>         | 3.57753 | 5.00E-05 | 0.00032 | 5.56736 | 5.00E-05 | 0.00038 |
| <b>Ctxn3</b>         | 3.57437 | 5.00E-05 | 0.00032 | 4.002   | 2.00E-04 | 0.00131 |
| <b>Mafk</b>          | 3.57387 | 5.00E-05 | 0.00032 | 3.60778 | 5.00E-05 | 0.00038 |
| <b>Hspb7</b>         | 3.57186 | 5.00E-05 | 0.00032 | 1.48465 | 0.01215  | 0.03973 |
| <b>Mocs1</b>         | 3.57149 | 5.00E-05 | 0.00032 | 3.7814  | 5.00E-05 | 0.00038 |
| <b>Hgs</b>           | 3.55057 | 5.00E-05 | 0.00032 | 3.38834 | 5.00E-05 | 0.00038 |
| <b>Runx1</b>         | 3.54441 | 5.00E-05 | 0.00032 | 4.42588 | 5.00E-05 | 0.00038 |
| <b>Ppp1r15a</b>      | 3.54053 | 5.00E-05 | 0.00032 | 3.9156  | 5.00E-05 | 0.00038 |
| <b>Aspg</b>          | 3.53637 | 0.00515  | 0.01761 | 3.75536 | 0.00445  | 0.01765 |
| <b>Krt80</b>         | 3.52616 | 5.00E-05 | 0.00032 | 6.0081  | 5.00E-05 | 0.00038 |
| <b>Taf1d</b>         | 3.47479 | 5.00E-05 | 0.00032 | 3.59523 | 5.00E-05 | 0.00038 |
| <b>Arntl</b>         | 3.44069 | 5.00E-05 | 0.00032 | 2.17766 | 5.00E-05 | 0.00038 |
| <b>Snhg12</b>        | 3.43475 | 5.00E-05 | 0.00032 | 4.57641 | 5.00E-05 | 0.00038 |
| <b>Gabarapl1</b>     | 3.42503 | 5.00E-05 | 0.00032 | 4.96391 | 5.00E-05 | 0.00038 |
| <b>Syt11</b>         | 3.40822 | 0.012    | 0.0353  | 3.594   | 0.0041   | 0.0165  |
| <b>Tmbim1</b>        | 3.39769 | 5.00E-05 | 0.00032 | 4.62547 | 5.00E-05 | 0.00038 |
| <b>Tgif1</b>         | 3.37704 | 5.00E-05 | 0.00032 | 3.88579 | 5.00E-05 | 0.00038 |
| <b>Clec18a</b>       | 3.37476 | 0.0013   | 0.00554 | 3.04525 | 0.0154   | 0.04794 |
| <b>Gm4511</b>        | 3.36639 | 5.00E-05 | 0.00032 | 2.47096 | 5.00E-05 | 0.00038 |

|                      |         |          |         |         |          |         |
|----------------------|---------|----------|---------|---------|----------|---------|
| <b>Btg2</b>          | 3.36274 | 5.00E-05 | 0.00032 | 4.73607 | 5.00E-05 | 0.00038 |
| <b>Ctps2</b>         | 3.35479 | 5.00E-05 | 0.00032 | 4.15947 | 5.00E-05 | 0.00038 |
| <b>Cd300lf</b>       | 3.35148 | 0.00255  | 0.00979 | 6.63553 | 0.00165  | 0.00782 |
| <b>lfi30</b>         | 3.32271 | 5.00E-05 | 0.00032 | 4.68496 | 5.00E-05 | 0.00038 |
| <b>Gm826</b>         | 3.31745 | 5.00E-05 | 0.00032 | 1.94099 | 1.00E-04 | 0.00072 |
| <b>Egln3</b>         | 3.29569 | 5.00E-05 | 0.00032 | 1.62927 | 5.00E-05 | 0.00038 |
| <b>Cyp1b1</b>        | 3.29026 | 5.00E-05 | 0.00032 | 3.64683 | 0.00045  | 0.00262 |
| <b>Figf</b>          | 3.28577 | 5.00E-05 | 0.00032 | 2.58376 | 5.00E-05 | 0.00038 |
| <b>Irs2</b>          | 3.2728  | 5.00E-05 | 0.00032 | 4.74579 | 5.00E-05 | 0.00038 |
| <b>GpnmB</b>         | 3.26434 | 5.00E-05 | 0.00032 | 4.70506 | 5.00E-05 | 0.00038 |
| <b>Tfdp2</b>         | 3.25722 | 5.00E-05 | 0.00032 | 4.0199  | 5.00E-05 | 0.00038 |
| <b>Hmgb2</b>         | 3.24685 | 5.00E-05 | 0.00032 | 3.94083 | 5.00E-05 | 0.00038 |
| <b>Ankrd55</b>       | 3.24539 | 0.00365  | 0.01315 | 3.51657 | 5.00E-05 | 0.00038 |
| <b>Npc1</b>          | 3.24055 | 5.00E-05 | 0.00032 | 3.25793 | 5.00E-05 | 0.00038 |
| <b>Lmod2</b>         | 3.23443 | 5.00E-05 | 0.00032 | 3.10346 | 5.00E-05 | 0.00038 |
| <b>Csrnp1</b>        | 3.23281 | 5.00E-05 | 0.00032 | 4.34865 | 5.00E-05 | 0.00038 |
| <b>Ranbp9</b>        | 3.19713 | 5.00E-05 | 0.00032 | 3.82251 | 5.00E-05 | 0.00038 |
| <b>Slc15a4</b>       | 3.19552 | 5.00E-05 | 0.00032 | 3.34717 | 5.00E-05 | 0.00038 |
| <b>Fibin</b>         | 3.17616 | 5.00E-05 | 0.00032 | 3.11407 | 5.00E-05 | 0.00038 |
| <b>Shroom3</b>       | 3.16928 | 0.00025  | 0.00135 | 3.13039 | 0.00265  | 0.01149 |
| <b>Gm11730</b>       | 3.1688  | 0.00045  | 0.00224 | 3.523   | 0.0029   | 0.01242 |
| <b>Gm9864</b>        | 3.16736 | 5.00E-05 | 0.00032 | 2.54622 | 5.00E-05 | 0.00038 |
| <b>Arid5a</b>        | 3.1544  | 5.00E-05 | 0.00032 | 3.90374 | 5.00E-05 | 0.00038 |
| <b>Sap30</b>         | 3.1505  | 5.00E-05 | 0.00032 | 3.06086 | 5.00E-05 | 0.00038 |
| <b>Tuba1c</b>        | 3.13742 | 5.00E-05 | 0.00032 | 3.05291 | 5.00E-05 | 0.00038 |
| <b>Slc25a34</b>      | 3.13084 | 5.00E-05 | 0.00032 | 1.92077 | 5.00E-05 | 0.00038 |
| <b>Csf2rb</b>        | 3.12306 | 5.00E-05 | 0.00032 | 3.17078 | 5.00E-05 | 0.00038 |
| <b>3110062M04Rik</b> | 3.11338 | 5.00E-05 | 0.00032 | 2.69669 | 5.00E-05 | 0.00038 |
| <b>Slc10a6</b>       | 3.08922 | 5.00E-05 | 0.00032 | 4.19472 | 5.00E-05 | 0.00038 |
| <b>Acot2</b>         | 3.08788 | 5.00E-05 | 0.00032 | 1.65642 | 5.00E-05 | 0.00038 |
| <b>Sgip1</b>         | 3.06363 | 5.00E-05 | 0.00032 | 3.05568 | 5.00E-05 | 0.00038 |
| <b>Aph1c</b>         | 3.06255 | 1.00E-04 | 0.0006  | 3.19214 | 3.00E-04 | 0.00184 |
| <b>Junb</b>          | 3.04611 | 5.00E-05 | 0.00032 | 4.31631 | 5.00E-05 | 0.00038 |
| <b>Slc7a8</b>        | 3.04507 | 5.00E-05 | 0.00032 | 3.23876 | 5.00E-05 | 0.00038 |
| <b>Foxo1</b>         | 3.03254 | 5.00E-05 | 0.00032 | 3.25836 | 5.00E-05 | 0.00038 |
| <b>Gm12240</b>       | 3.02968 | 0.00055  | 0.00266 | Inf     | 5.00E-05 | 0.00038 |
| <b>Gas5</b>          | 3.02466 | 5.00E-05 | 0.00032 | 4.01519 | 5.00E-05 | 0.00038 |
| <b>Mocos</b>         | 3.01897 | 5.00E-05 | 0.00032 | 2.80635 | 5.00E-05 | 0.00038 |
| <b>Gm2783</b>        | 3.00127 | 5.00E-05 | 0.00032 | 2.26129 | 0.01005  | 0.03423 |
| <b>Plin4</b>         | 2.99072 | 5.00E-05 | 0.00032 | 2.51292 | 5.00E-05 | 0.00038 |
| <b>Cxcl13</b>        | 2.98757 | 5.00E-04 | 0.00244 | 2.03627 | 0.0083   | 0.02932 |

|                      |         |          |         |         |          |         |
|----------------------|---------|----------|---------|---------|----------|---------|
| <b>Arrdc5</b>        | 2.97803 | 6.00E-04 | 0.00286 | 1.92118 | 0.0032   | 0.01343 |
| <b>Kcnk5</b>         | 2.96524 | 5.00E-05 | 0.00032 | 4.70251 | 5.00E-05 | 0.00038 |
| <b>Arrdc2</b>        | 2.94626 | 5.00E-05 | 0.00032 | 3.32979 | 5.00E-05 | 0.00038 |
| <b>D16H22S680E</b>   | 2.93163 | 5.00E-05 | 0.00032 | 2.93287 | 5.00E-05 | 0.00038 |
| <b>Fam55c</b>        | 2.91038 | 5.00E-05 | 0.00032 | 3.44763 | 5.00E-05 | 0.00038 |
| <b>Atf3</b>          | 2.90608 | 5.00E-05 | 0.00032 | 3.49949 | 5.00E-05 | 0.00038 |
| <b>Zwint</b>         | 2.90283 | 5.00E-05 | 0.00032 | 2.71305 | 5.00E-05 | 0.00038 |
| <b>E030010A14Rik</b> | 2.88914 | 5.00E-05 | 0.00032 | 2.57063 | 5.00E-05 | 0.00038 |
| <b>Klf15</b>         | 2.87976 | 5.00E-05 | 0.00032 | 3.61386 | 5.00E-05 | 0.00038 |
| <b>Nr1h4</b>         | 2.87936 | 0.00175  | 0.00715 | 5.2299  | 0.00315  | 0.01327 |
| <b>ltpkc</b>         | 2.87645 | 5.00E-05 | 0.00032 | 5.22749 | 5.00E-05 | 0.00038 |
| <b>Mknk2</b>         | 2.87045 | 5.00E-05 | 0.00032 | 2.364   | 5.00E-05 | 0.00038 |
| <b>Bdnf</b>          | 2.86557 | 5.00E-05 | 0.00032 | 2.23222 | 5.00E-05 | 0.00038 |
| <b>2410004N09Rik</b> | 2.84484 | 5.00E-05 | 0.00032 | 4.66499 | 5.00E-05 | 0.00038 |
| <b>Hif3a</b>         | 2.84243 | 5.00E-05 | 0.00032 | 2.4564  | 0.01385  | 0.04424 |
| <b>Kcnh6</b>         | 2.83521 | 5.00E-05 | 0.00032 | 3.5126  | 5.00E-05 | 0.00038 |
| <b>Gm11974</b>       | 2.82197 | 2.00E-04 | 0.00111 | 2.39493 | 5.00E-05 | 0.00038 |
| <b>Gprc5a</b>        | 2.82009 | 5.00E-05 | 0.00032 | 2.53692 | 0.00015  | 0.00102 |
| <b>Bnip3</b>         | 2.80675 | 5.00E-05 | 0.00032 | 2.9095  | 5.00E-05 | 0.00038 |
| <b>Gm9992</b>        | 2.79598 | 0.00185  | 0.00749 | Inf     | 5.00E-05 | 0.00038 |
| <b>Setdb2</b>        | 2.78789 | 5.00E-05 | 0.00032 | 2.91528 | 5.00E-05 | 0.00038 |
| <b>Errfi1</b>        | 2.78361 | 5.00E-05 | 0.00032 | 2.59729 | 5.00E-05 | 0.00038 |
| <b>Gm3662</b>        | 2.78327 | 5.00E-05 | 0.00032 | 2.37318 | 5.00E-05 | 0.00038 |
| <b>Tbc1d15</b>       | 2.77831 | 5.00E-05 | 0.00032 | 2.96084 | 5.00E-05 | 0.00038 |
| <b>Sim2</b>          | 2.77476 | 5.00E-05 | 0.00032 | 1.78931 | 5.00E-05 | 0.00038 |
| <b>Rasd1</b>         | 2.7708  | 5.00E-05 | 0.00032 | 4.16613 | 5.00E-05 | 0.00038 |
| <b>Akt1</b>          | 2.76836 | 5.00E-05 | 0.00032 | 2.91567 | 5.00E-05 | 0.00038 |
| <b>1810032O08Rik</b> | 2.7681  | 5.00E-05 | 0.00032 | 3.43925 | 5.00E-05 | 0.00038 |
| <b>Trp53inp1</b>     | 2.75293 | 5.00E-05 | 0.00032 | 4.5894  | 5.00E-05 | 0.00038 |
| <b>Ctla2a</b>        | 2.75251 | 5.00E-05 | 0.00032 | 2.04611 | 5.00E-05 | 0.00038 |
| <b>Igfbp3</b>        | 2.74436 | 5.00E-05 | 0.00032 | 2.97562 | 5.00E-05 | 0.00038 |
| <b>Apold1</b>        | 2.74383 | 5.00E-05 | 0.00032 | 1.86327 | 5.00E-05 | 0.00038 |
| <b>Arl8a</b>         | 2.74257 | 5.00E-05 | 0.00032 | 2.69799 | 5.00E-05 | 0.00038 |
| <b>Kcnip2</b>        | 2.74191 | 5.00E-05 | 0.00032 | 4.79362 | 5.00E-05 | 0.00038 |
| <b>1190002H23Rik</b> | 2.73437 | 5.00E-05 | 0.00032 | 2.15944 | 5.00E-05 | 0.00038 |
| <b>Map3k14</b>       | 2.73018 | 5.00E-05 | 0.00032 | 2.29486 | 5.00E-05 | 0.00038 |
| <b>Fdft1</b>         | 2.72968 | 5.00E-05 | 0.00032 | 2.79513 | 0.00255  | 0.01114 |
| <b>Pank1</b>         | 2.72963 | 5.00E-05 | 0.00032 | 2.30569 | 5.00E-05 | 0.00038 |
| <b>Tmem37</b>        | 2.71352 | 5.00E-05 | 0.00032 | 3.32549 | 5.00E-05 | 0.00038 |
| <b>S100a9</b>        | 2.70872 | 5.00E-05 | 0.00032 | 9.48047 | 5.00E-05 | 0.00038 |
| <b>Ccdc136</b>       | 2.70625 | 5.00E-05 | 0.00032 | 2.03598 | 3.00E-04 | 0.00184 |

|                      |         |          |         |         |          |         |
|----------------------|---------|----------|---------|---------|----------|---------|
| <b>Gabrr1</b>        | 2.70498 | 0.0016   | 0.00663 | 2.61918 | 0.0096   | 0.03306 |
| <b>Plaur</b>         | 2.69013 | 5.00E-05 | 0.00032 | 3.60181 | 5.00E-05 | 0.00038 |
| <b>Mrpl41</b>        | 2.67745 | 5.00E-05 | 0.00032 | 2.88858 | 5.00E-05 | 0.00038 |
| <b>Ddx56</b>         | 2.67156 | 5.00E-05 | 0.00032 | 1.9294  | 5.00E-05 | 0.00038 |
| <b>Fam132b</b>       | 2.67121 | 4.00E-04 | 0.00203 | 2.09041 | 0.0023   | 0.01029 |
| <b>Nploc4</b>        | 2.66786 | 5.00E-05 | 0.00032 | 2.50537 | 5.00E-05 | 0.00038 |
| <b>Slc38a6</b>       | 2.66587 | 5.00E-05 | 0.00032 | 2.42658 | 5.00E-05 | 0.00038 |
| <b>Bcl2l1</b>        | 2.66563 | 5.00E-05 | 0.00032 | 3.57464 | 5.00E-05 | 0.00038 |
| <b>Pla2g12a</b>      | 2.65938 | 5.00E-05 | 0.00032 | 2.37902 | 5.00E-05 | 0.00038 |
| <b>Scgb3a1</b>       | 2.6546  | 0.0152   | 0.04286 | 4.40976 | 0.00035  | 0.00212 |
| <b>Napb</b>          | 2.64794 | 5.00E-05 | 0.00032 | 2.6718  | 5.00E-05 | 0.00038 |
| <b>Tcta</b>          | 2.64424 | 5.00E-05 | 0.00032 | 1.18426 | 1.00E-04 | 0.00072 |
| <b>Enc1</b>          | 2.63855 | 5.00E-05 | 0.00032 | 1.64485 | 5.00E-05 | 0.00038 |
| <b>4931428F04Rik</b> | 2.63204 | 5.00E-05 | 0.00032 | 1.83188 | 0.01185  | 0.03901 |
| <b>Zbtb16</b>        | 2.63115 | 5.00E-05 | 0.00032 | 2.7727  | 5.00E-05 | 0.00038 |
| <b>RP23-344J14.1</b> | 2.61898 | 5.00E-05 | 0.00032 | 1.76205 | 5.00E-05 | 0.00038 |
| <b>Armcx5</b>        | 2.61448 | 5.00E-05 | 0.00032 | 1.92312 | 0.00855  | 0.02999 |
| <b>Dio2</b>          | 2.60647 | 5.00E-05 | 0.00032 | 2.1201  | 5.00E-05 | 0.00038 |
| <b>Plin5</b>         | 2.6049  | 5.00E-05 | 0.00032 | 1.48927 | 5.00E-05 | 0.00038 |
| <b>Ubxn4</b>         | 2.58981 | 5.00E-05 | 0.00032 | 2.3336  | 5.00E-05 | 0.00038 |
| <b>Usp3</b>          | 2.58733 | 5.00E-05 | 0.00032 | 2.49975 | 5.00E-05 | 0.00038 |
| <b>Pnpla2</b>        | 2.57386 | 5.00E-05 | 0.00032 | 2.59429 | 5.00E-05 | 0.00038 |
| <b>Dmxi2</b>         | 2.55908 | 5.00E-05 | 0.00032 | 3.09625 | 5.00E-05 | 0.00038 |
| <b>Elk4</b>          | 2.54588 | 5.00E-05 | 0.00032 | 2.46946 | 5.00E-05 | 0.00038 |
| <b>Pim3</b>          | 2.534   | 5.00E-05 | 0.00032 | 3.61052 | 5.00E-05 | 0.00038 |
| <b>Myh14</b>         | 2.53262 | 5.00E-05 | 0.00032 | 2.35357 | 5.00E-05 | 0.00038 |
| <b>Anapc16</b>       | 2.52013 | 5.00E-05 | 0.00032 | 2.59087 | 5.00E-05 | 0.00038 |
| <b>Rnf125</b>        | 2.51539 | 5.00E-05 | 0.00032 | 1.70514 | 5.00E-05 | 0.00038 |
| <b>Gm14634</b>       | 2.51073 | 9.00E-04 | 0.00406 | 2.05096 | 0.00415  | 0.01665 |
| <b>Ccrn4l</b>        | 2.50227 | 5.00E-05 | 0.00032 | 2.22373 | 5.00E-05 | 0.00038 |
| <b>Dync1li1</b>      | 2.49597 | 5.00E-05 | 0.00032 | 2.92824 | 5.00E-05 | 0.00038 |
| <b>Gpr157</b>        | 2.4922  | 5.00E-05 | 0.00032 | 3.10968 | 5.00E-05 | 0.00038 |
| <b>Ppig</b>          | 2.48519 | 5.00E-05 | 0.00032 | 2.4121  | 5.00E-05 | 0.00038 |
| <b>Lgals4</b>        | 2.4813  | 5.00E-05 | 0.00032 | 1.99928 | 5.00E-05 | 0.00038 |
| <b>Nfil3</b>         | 2.47526 | 5.00E-05 | 0.00032 | 3.97303 | 5.00E-05 | 0.00038 |
| <b>Gclm</b>          | 2.4741  | 6.00E-04 | 0.00286 | 2.79195 | 0.00905  | 0.03147 |
| <b>Mustn1</b>        | 2.47126 | 5.00E-05 | 0.00032 | 3.05319 | 5.00E-05 | 0.00038 |
| <b>Atp6v1h</b>       | 2.46569 | 5.00E-05 | 0.00032 | 2.31508 | 5.00E-05 | 0.00038 |
| <b>Anubl1</b>        | 2.45078 | 5.00E-05 | 0.00032 | 2.19056 | 5.00E-05 | 0.00038 |
| <b>Slc35f5</b>       | 2.43946 | 5.00E-05 | 0.00032 | 2.10272 | 5.00E-05 | 0.00038 |
| <b>Ankrd2</b>        | 2.43587 | 5.00E-05 | 0.00032 | 1.75585 | 3.00E-04 | 0.00184 |

|                      |         |          |         |         |          |         |
|----------------------|---------|----------|---------|---------|----------|---------|
| <b>lfrd1</b>         | 2.43461 | 5.00E-05 | 0.00032 | 3.7963  | 5.00E-05 | 0.00038 |
| <b>Il4ra</b>         | 2.434   | 5.00E-05 | 0.00032 | 2.31876 | 5.00E-05 | 0.00038 |
| <b>Slc20a1</b>       | 2.42689 | 5.00E-05 | 0.00032 | 2.49453 | 5.00E-05 | 0.00038 |
| <b>BC027231</b>      | 2.42667 | 5.00E-05 | 0.00032 | 1.96912 | 0.0016   | 0.00763 |
| <b>Csf3r</b>         | 2.41975 | 1.00E-04 | 0.0006  | 5.37194 | 5.00E-05 | 0.00038 |
| <b>4931406P16Rik</b> | 2.41541 | 5.00E-05 | 0.00032 | 2.52362 | 5.00E-05 | 0.00038 |
| <b>Gm9889</b>        | 2.4154  | 0.0144   | 0.04093 | 1.88009 | 0.0145   | 0.04576 |
| <b>1110038D17Rik</b> | 2.41116 | 5.00E-05 | 0.00032 | 2.63124 | 5.00E-05 | 0.00038 |
| <b>Fam63a</b>        | 2.40479 | 5.00E-05 | 0.00032 | 1.71307 | 0.0074   | 0.02672 |
| <b>Galnt12</b>       | 2.40042 | 5.00E-05 | 0.00032 | 2.98474 | 5.00E-05 | 0.00038 |
| <b>Pnpla7</b>        | 2.39955 | 5.00E-05 | 0.00032 | 2.61438 | 5.00E-05 | 0.00038 |
| <b>Zfp189</b>        | 2.39659 | 5.00E-05 | 0.00032 | 2.17533 | 5.00E-05 | 0.00038 |
| <b>Arrdc3</b>        | 2.39352 | 5.00E-05 | 0.00032 | 2.95149 | 5.00E-05 | 0.00038 |
| <b>Csf2rb2</b>       | 2.39106 | 5.00E-05 | 0.00032 | 2.99264 | 5.00E-05 | 0.00038 |
| <b>Psma7</b>         | 2.3904  | 5.00E-05 | 0.00032 | 2.10816 | 5.00E-05 | 0.00038 |
| <b>Zfp36</b>         | 2.39014 | 5.00E-05 | 0.00032 | 3.45557 | 5.00E-05 | 0.00038 |
| <b>Tcp11l2</b>       | 2.38903 | 5.00E-05 | 0.00032 | 3.70098 | 5.00E-05 | 0.00038 |
| <b>Ednrb</b>         | 2.38404 | 5.00E-05 | 0.00032 | 1.48178 | 5.00E-05 | 0.00038 |
| <b>Mmp9</b>          | 2.38254 | 0.01075  | 0.03222 | 5.00689 | 5.00E-05 | 0.00038 |
| <b>Lrrc30</b>        | 2.37476 | 5.00E-05 | 0.00032 | 2.47403 | 5.00E-05 | 0.00038 |
| <b>Psmc4</b>         | 2.37015 | 5.00E-05 | 0.00032 | 2.44113 | 5.00E-05 | 0.00038 |
| <b>Paox</b>          | 2.36753 | 5.00E-05 | 0.00032 | 2.81497 | 5.00E-05 | 0.00038 |
| <b>Avil</b>          | 2.35186 | 0.00065  | 0.00308 | 2.34876 | 0.00025  | 0.00159 |
| <b>Slc43a2</b>       | 2.34646 | 5.00E-05 | 0.00032 | 1.65418 | 0.00015  | 0.00102 |
| <b>Cldn5</b>         | 2.34595 | 5.00E-05 | 0.00032 | 0.7837  | 0.01275  | 0.04138 |
| <b>Snhg1</b>         | 2.33694 | 5.00E-05 | 0.00032 | 2.54961 | 5.00E-05 | 0.00038 |
| <b>Ubb</b>           | 2.33035 | 5.00E-05 | 0.00032 | 2.53124 | 5.00E-05 | 0.00038 |
| <b>Psmc4</b>         | 2.32138 | 5.00E-05 | 0.00032 | 1.95786 | 5.00E-05 | 0.00038 |
| <b>Cidea</b>         | 2.31832 | 0.00895  | 0.02781 | 3.42824 | 5.00E-05 | 0.00038 |
| <b>Adamts12</b>      | 2.31525 | 6.00E-04 | 0.00286 | 2.94391 | 5.00E-05 | 0.00038 |
| <b>Prom1</b>         | 2.31343 | 5.00E-05 | 0.00032 | 1.39441 | 5.00E-05 | 0.00038 |
| <b>Ldlrad3</b>       | 2.31212 | 5.00E-05 | 0.00032 | 2.56581 | 5.00E-05 | 0.00038 |
| <b>Whamm</b>         | 2.30838 | 5.00E-05 | 0.00032 | 2.12232 | 5.00E-05 | 0.00038 |
| <b>Dgat2</b>         | 2.3061  | 5.00E-05 | 0.00032 | 1.97177 | 5.00E-05 | 0.00038 |
| <b>Gm1821</b>        | 2.30054 | 0.00335  | 0.01227 | 2.36744 | 1.00E-04 | 0.00072 |
| <b>Sertad2</b>       | 2.29856 | 5.00E-05 | 0.00032 | 2.38629 | 5.00E-05 | 0.00038 |
| <b>Sctr</b>          | 2.29798 | 5.00E-05 | 0.00032 | 1.32455 | 5.00E-05 | 0.00038 |
| <b>Adig</b>          | 2.29271 | 1.00E-04 | 0.0006  | 2.10404 | 4.00E-04 | 0.00237 |
| <b>Car4</b>          | 2.29206 | 5.00E-05 | 0.00032 | 2.38109 | 5.00E-05 | 0.00038 |
| <b>Cdkal1</b>        | 2.28276 | 5.00E-05 | 0.00032 | 3.72009 | 5.00E-05 | 0.00038 |
| <b>Cry2</b>          | 2.27803 | 5.00E-05 | 0.00032 | 4.07133 | 5.00E-05 | 0.00038 |



|                      |         |          |         |         |          |         |
|----------------------|---------|----------|---------|---------|----------|---------|
| <b>Acer2</b>         | 2.27683 | 5.00E-05 | 0.00032 | 1.9168  | 5.00E-05 | 0.00038 |
| <b>Greb1</b>         | 2.27523 | 0.00545  | 0.01845 | 3.37911 | 5.00E-05 | 0.00038 |
| <b>RP24-201C14.5</b> | 2.27226 | 5.00E-05 | 0.00032 | 2.51083 | 5.00E-05 | 0.00038 |
| <b>Abcc8</b>         | 2.26718 | 5.00E-05 | 0.00032 | 0.85227 | 0.01135  | 0.03772 |
| <b>Ankrd33b</b>      | 2.2669  | 5.00E-05 | 0.00032 | 3.03229 | 5.00E-05 | 0.00038 |
| <b>Nt5dc1</b>        | 2.2629  | 5.00E-05 | 0.00032 | 1.92276 | 5.00E-05 | 0.00038 |
| <b>Got1</b>          | 2.25621 | 5.00E-05 | 0.00032 | 2.81914 | 5.00E-05 | 0.00038 |
| <b>Zfp346</b>        | 2.25532 | 5.00E-05 | 0.00032 | 2.55165 | 5.00E-05 | 0.00038 |
| <b>Mnt</b>           | 2.25444 | 5.00E-05 | 0.00032 | 2.34721 | 5.00E-05 | 0.00038 |
| <b>Gm12840</b>       | 2.25234 | 5.00E-05 | 0.00032 | 4.05826 | 5.00E-05 | 0.00038 |
| <b>Trafd1</b>        | 2.25203 | 5.00E-05 | 0.00032 | 2.64001 | 5.00E-05 | 0.00038 |
| <b>Litaf</b>         | 2.24673 | 5.00E-05 | 0.00032 | 2.14073 | 5.00E-05 | 0.00038 |
| <b>Ddx21</b>         | 2.24075 | 5.00E-05 | 0.00032 | 2.13797 | 5.00E-05 | 0.00038 |
| <b>Grrp1</b>         | 2.23891 | 5.00E-05 | 0.00032 | 2.50626 | 5.00E-05 | 0.00038 |
| <b>Ticam1</b>        | 2.23734 | 5.00E-05 | 0.00032 | 2.67436 | 5.00E-05 | 0.00038 |
| <b>Cobll1</b>        | 2.22764 | 5.00E-05 | 0.00032 | 3.39685 | 5.00E-05 | 0.00038 |
| <b>Per1</b>          | 2.22486 | 5.00E-05 | 0.00032 | 2.88536 | 5.00E-05 | 0.00038 |
| <b>MIIt10</b>        | 2.22468 | 5.00E-05 | 0.00032 | 2.32725 | 5.00E-05 | 0.00038 |
| <b>Tex264</b>        | 2.22395 | 5.00E-05 | 0.00032 | 2.33005 | 5.00E-05 | 0.00038 |
| <b>Ern1</b>          | 2.22147 | 5.00E-05 | 0.00032 | 2.84659 | 5.00E-05 | 0.00038 |
| <b>Taf7</b>          | 2.21874 | 5.00E-05 | 0.00032 | 1.03807 | 0.00515  | 0.01983 |
| <b>Gaa</b>           | 2.21189 | 5.00E-05 | 0.00032 | 2.427   | 5.00E-05 | 0.00038 |
| <b>Sbds</b>          | 2.21185 | 5.00E-05 | 0.00032 | 2.82459 | 5.00E-05 | 0.00038 |
| <b>Med15</b>         | 2.21003 | 5.00E-05 | 0.00032 | 2.39113 | 5.00E-05 | 0.00038 |
| <b>2310028H24Rik</b> | 2.20951 | 5.00E-05 | 0.00032 | 2.00343 | 5.00E-05 | 0.00038 |
| <b>Mnd1</b>          | 2.20475 | 0.01195  | 0.0352  | 2.34183 | 5.00E-05 | 0.00038 |
| <b>Hspb1</b>         | 2.20391 | 5.00E-05 | 0.00032 | 2.28089 | 5.00E-05 | 0.00038 |
| <b>A930001N09Rik</b> | 2.19969 | 5.00E-05 | 0.00032 | 2.41105 | 5.00E-05 | 0.00038 |
| <b>Pnrc1</b>         | 2.19775 | 5.00E-05 | 0.00032 | 3.03777 | 5.00E-05 | 0.00038 |
| <b>Twf2</b>          | 2.19766 | 5.00E-05 | 0.00032 | 2.3621  | 5.00E-05 | 0.00038 |
| <b>Hist2h4</b>       | 2.19487 | 0.002    | 0.00799 | 1.37659 | 0.01605  | 0.04955 |
| <b>Rhbdf2</b>        | 2.18771 | 5.00E-05 | 0.00032 | 2.89646 | 5.00E-05 | 0.00038 |
| <b>Inca1</b>         | 2.18762 | 5.00E-05 | 0.00032 | 1.55954 | 1.00E-04 | 0.00072 |
| <b>Klf10</b>         | 2.1821  | 5.00E-05 | 0.00032 | 1.68157 | 1.00E-04 | 0.00072 |
| <b>Foxo3</b>         | 2.17931 | 5.00E-05 | 0.00032 | 2.11155 | 5.00E-05 | 0.00038 |
| <b>Pir</b>           | 2.17416 | 5.00E-05 | 0.00032 | 2.1686  | 5.00E-05 | 0.00038 |
| <b>Tspyl2</b>        | 2.17386 | 5.00E-05 | 0.00032 | 2.67111 | 5.00E-05 | 0.00038 |
| <b>Sbno2</b>         | 2.17338 | 5.00E-05 | 0.00032 | 2.40677 | 5.00E-05 | 0.00038 |
| <b>Tenc1</b>         | 2.17336 | 5.00E-05 | 0.00032 | 2.05549 | 5.00E-05 | 0.00038 |
| <b>Malt1</b>         | 2.17298 | 5.00E-05 | 0.00032 | 2.8708  | 5.00E-05 | 0.00038 |
| <b>Xirp1</b>         | 2.16776 | 5.00E-05 | 0.00032 | 2.28413 | 5.00E-05 | 0.00038 |

|                      |         |          |         |         |          |         |
|----------------------|---------|----------|---------|---------|----------|---------|
| <b>3230401D17Rik</b> | 2.16425 | 5.00E-05 | 0.00032 | 2.26987 | 5.00E-05 | 0.00038 |
| <b>Arfgap3</b>       | 2.16244 | 5.00E-05 | 0.00032 | 3.59137 | 5.00E-05 | 0.00038 |
| <b>Sema6b</b>        | 2.16082 | 5.00E-05 | 0.00032 | 2.25425 | 5.00E-05 | 0.00038 |
| <b>Gm129</b>         | 2.16053 | 5.00E-05 | 0.00032 | 3.04779 | 5.00E-05 | 0.00038 |
| <b>Acacb</b>         | 2.15671 | 5.00E-05 | 0.00032 | 1.68379 | 5.00E-05 | 0.00038 |
| <b>Mlycd</b>         | 2.15609 | 5.00E-05 | 0.00032 | 1.59368 | 5.00E-05 | 0.00038 |
| <b>Spns2</b>         | 2.15529 | 5.00E-05 | 0.00032 | 3.44977 | 5.00E-05 | 0.00038 |
| <b>Ip6k3</b>         | 2.15459 | 5.00E-05 | 0.00032 | 2.0435  | 5.00E-05 | 0.00038 |
| <b>Mfap1a</b>        | 2.14599 | 5.00E-05 | 0.00032 | 1.72469 | 5.00E-05 | 0.00038 |
| <b>Myo5a</b>         | 2.14439 | 5.00E-05 | 0.00032 | 3.687   | 5.00E-05 | 0.00038 |
| <b>Zkscan6</b>       | 2.14144 | 5.00E-05 | 0.00032 | 2.97434 | 5.00E-05 | 0.00038 |
| <b>Psm11</b>         | 2.1405  | 5.00E-05 | 0.00032 | 1.72288 | 5.00E-05 | 0.00038 |
| <b>Kdsr</b>          | 2.13873 | 5.00E-05 | 0.00032 | 1.65287 | 5.00E-05 | 0.00038 |
| <b>Wdr81</b>         | 2.1352  | 5.00E-05 | 0.00032 | 2.90565 | 5.00E-05 | 0.00038 |
| <b>Ivns1abp</b>      | 2.12936 | 5.00E-05 | 0.00032 | 2.033   | 5.00E-05 | 0.00038 |
| <b>Ubc</b>           | 2.12436 | 5.00E-05 | 0.00032 | 3.81618 | 5.00E-05 | 0.00038 |
| <b>Sqstm1</b>        | 2.12387 | 5.00E-05 | 0.00032 | 2.50029 | 5.00E-05 | 0.00038 |
| <b>Heatr7a</b>       | 2.12162 | 5.00E-05 | 0.00032 | 2.25287 | 5.00E-05 | 0.00038 |
| <b>4931408A02Rik</b> | 2.12049 | 0.0052   | 0.01776 | 2.12542 | 0.00295  | 0.01259 |
| <b>Ctdp1</b>         | 2.12024 | 5.00E-05 | 0.00032 | 2.75837 | 5.00E-05 | 0.00038 |
| <b>Gda</b>           | 2.12011 | 5.00E-05 | 0.00032 | 2.58394 | 5.00E-05 | 0.00038 |
| <b>Uvrag</b>         | 2.11437 | 5.00E-05 | 0.00032 | 2.6137  | 5.00E-05 | 0.00038 |
| <b>Lrrc29</b>        | 2.11376 | 0.00015  | 0.00086 | 2.60957 | 0.00055  | 0.00312 |
| <b>Sdc4</b>          | 2.11295 | 5.00E-05 | 0.00032 | 2.74339 | 5.00E-05 | 0.00038 |
| <b>Tmem87b</b>       | 2.11176 | 5.00E-05 | 0.00032 | 2.76402 | 5.00E-05 | 0.00038 |
| <b>Map3k8</b>        | 2.11016 | 5.00E-05 | 0.00032 | 2.21941 | 5.00E-05 | 0.00038 |
| <b>Pik3r1</b>        | 2.1097  | 5.00E-05 | 0.00032 | 2.35653 | 5.00E-05 | 0.00038 |
| <b>Mex3d</b>         | 2.10536 | 5.00E-05 | 0.00032 | 2.03135 | 5.00E-05 | 0.00038 |
| <b>Fam164c</b>       | 2.1041  | 5.00E-05 | 0.00032 | 1.86847 | 5.00E-05 | 0.00038 |
| <b>Tbx1</b>          | 2.10397 | 5.00E-05 | 0.00032 | 2.5595  | 5.00E-05 | 0.00038 |
| <b>Timm10</b>        | 2.10223 | 5.00E-05 | 0.00032 | 1.65814 | 5.00E-05 | 0.00038 |
| <b>Gm16516</b>       | 2.10147 | 5.00E-05 | 0.00032 | 1.12287 | 0.00265  | 0.01149 |
| <b>Gpr160</b>        | 2.10126 | 0.00175  | 0.00715 | 2.85389 | 5.00E-05 | 0.00038 |
| <b>Snrnp48</b>       | 2.09878 | 5.00E-05 | 0.00032 | 2.46196 | 5.00E-05 | 0.00038 |
| <b>Bex1</b>          | 2.09861 | 9.00E-04 | 0.00406 | 2.61157 | 0.0034   | 0.01416 |
| <b>Eif3a</b>         | 2.09396 | 5.00E-05 | 0.00032 | 2.74294 | 5.00E-05 | 0.00038 |
| <b>Filip1</b>        | 2.09038 | 5.00E-05 | 0.00032 | 1.81917 | 5.00E-05 | 0.00038 |
| <b>Odf2</b>          | 2.08584 | 5.00E-05 | 0.00032 | 2.65426 | 5.00E-05 | 0.00038 |
| <b>Fbxo30</b>        | 2.08557 | 5.00E-05 | 0.00032 | 1.82845 | 5.00E-05 | 0.00038 |
| <b>Zfand2a</b>       | 2.08261 | 5.00E-05 | 0.00032 | 2.29312 | 5.00E-05 | 0.00038 |
| <b>1500012F01Rik</b> | 2.07831 | 2.00E-04 | 0.00111 | 3.37467 | 5.00E-05 | 0.00038 |

|                 |         |          |         |         |          |         |
|-----------------|---------|----------|---------|---------|----------|---------|
| <b>Sox4</b>     | 2.07277 | 5.00E-05 | 0.00032 | 3.99965 | 5.00E-05 | 0.00038 |
| <b>Psmid8</b>   | 2.0661  | 5.00E-05 | 0.00032 | 1.96676 | 5.00E-05 | 0.00038 |
| <b>Bnip3l</b>   | 2.06335 | 5.00E-05 | 0.00032 | 2.37301 | 5.00E-05 | 0.00038 |
| <b>Cebpb</b>    | 2.06136 | 5.00E-05 | 0.00032 | 2.84698 | 5.00E-05 | 0.00038 |
| <b>Bach1</b>    | 2.06085 | 5.00E-05 | 0.00032 | 2.10825 | 5.00E-05 | 0.00038 |
| <b>Ptp4a1</b>   | 2.0588  | 5.00E-05 | 0.00032 | 1.39092 | 0.00055  | 0.00312 |
| <b>Aspscr1</b>  | 2.05551 | 5.00E-05 | 0.00032 | 2.47651 | 5.00E-05 | 0.00038 |
| <b>Zfp617</b>   | 2.05518 | 5.00E-05 | 0.00032 | 1.27265 | 1.00E-04 | 0.00072 |
| <b>Trp53i11</b> | 2.04687 | 5.00E-05 | 0.00032 | -0.8476 | 0.01395  | 0.04445 |
| <b>Nfkbib</b>   | 2.04237 | 0.00045  | 0.00224 | 2.21157 | 0.00865  | 0.0303  |
| <b>Gnl3</b>     | 2.04205 | 5.00E-05 | 0.00032 | 1.74516 | 0.00745  | 0.02687 |
| <b>Psmid3</b>   | 2.04146 | 5.00E-05 | 0.00032 | 1.52332 | 5.00E-05 | 0.00038 |
| <b>Nudt16</b>   | 2.04054 | 5.00E-05 | 0.00032 | 2.41574 | 5.00E-05 | 0.00038 |
| <b>Zfp771</b>   | 2.03998 | 5.00E-05 | 0.00032 | 2.24978 | 3.00E-04 | 0.00184 |
| <b>Gtf3c4</b>   | 2.03468 | 5.00E-05 | 0.00032 | 1.18616 | 1.00E-04 | 0.00072 |
| <b>Idua</b>     | 2.03426 | 5.00E-05 | 0.00032 | 1.54607 | 0.00565  | 0.02137 |
| <b>Fam105b</b>  | 2.02952 | 5.00E-05 | 0.00032 | 2.12879 | 5.00E-05 | 0.00038 |
| <b>Abhd4</b>    | 2.02713 | 5.00E-05 | 0.00032 | 2.07268 | 5.00E-05 | 0.00038 |
| <b>Edem1</b>    | 2.02348 | 5.00E-05 | 0.00032 | 2.52488 | 5.00E-05 | 0.00038 |
| <b>Nsmce1</b>   | 2.02246 | 5.00E-05 | 0.00032 | 2.27298 | 5.00E-05 | 0.00038 |
| <b>Slc9a1</b>   | 2.02185 | 5.00E-05 | 0.00032 | 1.63676 | 5.00E-05 | 0.00038 |
| <b>Amotl2</b>   | 2.02009 | 5.00E-05 | 0.00032 | 2.42884 | 5.00E-05 | 0.00038 |
| <b>Gm9774</b>   | 2.01289 | 0.0064   | 0.02114 | 2.21096 | 0.0046   | 0.01814 |
| <b>Catsper4</b> | 2.01066 | 5.00E-04 | 0.00244 | 2.0769  | 5.00E-04 | 0.00287 |
| <b>Baiap2l1</b> | 2.00464 | 0.0087   | 0.02717 | 3.3405  | 5.00E-05 | 0.00038 |
| <b>Gtpbp4</b>   | 2.00414 | 5.00E-05 | 0.00032 | 1.98568 | 5.00E-05 | 0.00038 |
| <b>Sorbs3</b>   | 2.00313 | 5.00E-05 | 0.00032 | 2.93554 | 5.00E-05 | 0.00038 |
| <b>Gm17672</b>  | 1.99997 | 0.0035   | 0.01272 | 2.70452 | 5.00E-05 | 0.00038 |
| <b>Zxdc</b>     | 1.99853 | 5.00E-05 | 0.00032 | 2.35526 | 5.00E-05 | 0.00038 |
| <b>Accn3</b>    | 1.99709 | 0.00515  | 0.01761 | 2.88929 | 5.00E-05 | 0.00038 |
| <b>Zfyve1</b>   | 1.99372 | 5.00E-05 | 0.00032 | 2.28399 | 5.00E-05 | 0.00038 |
| <b>Zc3h6</b>    | 1.99308 | 5.00E-05 | 0.00032 | 1.98481 | 5.00E-05 | 0.00038 |
| <b>Cd68</b>     | 1.99249 | 5.00E-05 | 0.00032 | 4.29179 | 5.00E-05 | 0.00038 |
| <b>Nmd3</b>     | 1.98832 | 5.00E-05 | 0.00032 | 1.5324  | 5.00E-05 | 0.00038 |
| <b>Osmr</b>     | 1.9862  | 5.00E-05 | 0.00032 | 1.41789 | 0.00025  | 0.00159 |
| <b>Psmid2</b>   | 1.98496 | 5.00E-05 | 0.00032 | 1.56976 | 3.00E-04 | 0.00184 |
| <b>Ulk1</b>     | 1.98482 | 5.00E-05 | 0.00032 | 2.0743  | 5.00E-05 | 0.00038 |
| <b>Gcc2</b>     | 1.98471 | 5.00E-05 | 0.00032 | 2.19368 | 5.00E-05 | 0.00038 |
| <b>Gm16854</b>  | 1.9843  | 5.00E-05 | 0.00032 | 4.70914 | 5.00E-05 | 0.00038 |
| <b>Tle1</b>     | 1.98154 | 5.00E-05 | 0.00032 | 1.32685 | 2.00E-04 | 0.00131 |
| <b>Fosl2</b>    | 1.97748 | 5.00E-05 | 0.00032 | 2.43838 | 5.00E-05 | 0.00038 |

|                      |         |          |         |         |          |         |
|----------------------|---------|----------|---------|---------|----------|---------|
| <b>Plekhm2</b>       | 1.97705 | 5.00E-05 | 0.00032 | 1.59003 | 0.00025  | 0.00159 |
| <b>Siah1a</b>        | 1.97192 | 5.00E-05 | 0.00032 | 2.09969 | 5.00E-05 | 0.00038 |
| <b>Zfp655</b>        | 1.97066 | 5.00E-05 | 0.00032 | 2.52525 | 5.00E-05 | 0.00038 |
| <b>AK129341</b>      | 1.96689 | 5.00E-05 | 0.00032 | 1.93166 | 1.00E-04 | 0.00072 |
| <b>Plaa</b>          | 1.96508 | 5.00E-05 | 0.00032 | 1.4195  | 5.00E-05 | 0.00038 |
| <b>Nap1l1</b>        | 1.96294 | 5.00E-05 | 0.00032 | 1.80962 | 5.00E-05 | 0.00038 |
| <b>Il1r2</b>         | 1.95449 | 0.0068   | 0.02218 | 6.27132 | 0.00125  | 0.00621 |
| <b>Sdad1</b>         | 1.95268 | 5.00E-05 | 0.00032 | 1.889   | 5.00E-05 | 0.00038 |
| <b>Adamts15</b>      | 1.94821 | 5.00E-05 | 0.00032 | 1.01723 | 0.0029   | 0.01242 |
| <b>Snhg5</b>         | 1.94683 | 5.00E-05 | 0.00032 | 2.78759 | 5.00E-05 | 0.00038 |
| <b>Cwc22</b>         | 1.93936 | 1.00E-04 | 0.0006  | 2.08443 | 5.00E-05 | 0.00038 |
| <b>Chchd8</b>        | 1.93909 | 5.00E-05 | 0.00032 | 1.93095 | 1.00E-04 | 0.00072 |
| <b>Mapk6</b>         | 1.93779 | 5.00E-05 | 0.00032 | 1.38641 | 5.00E-05 | 0.00038 |
| <b>Arrdc4</b>        | 1.93725 | 5.00E-05 | 0.00032 | 2.04024 | 5.00E-05 | 0.00038 |
| <b>Ube4a</b>         | 1.93513 | 5.00E-05 | 0.00032 | 1.49441 | 5.00E-05 | 0.00038 |
| <b>Hist1h2al</b>     | 1.93465 | 5.00E-05 | 0.00032 | 1.90211 | 5.00E-05 | 0.00038 |
| <b>Smad7</b>         | 1.93308 | 5.00E-05 | 0.00032 | 1.06755 | 0.014    | 0.04456 |
| <b>Acr</b>           | 1.92901 | 0.0105   | 0.0317  | 2.36462 | 0.00405  | 0.01634 |
| <b>Abca4</b>         | 1.9287  | 0.0022   | 0.00865 | 3.65005 | 5.00E-05 | 0.00038 |
| <b>Nufip1</b>        | 1.92274 | 5.00E-05 | 0.00032 | 2.09426 | 5.00E-05 | 0.00038 |
| <b>BC026585</b>      | 1.92214 | 0.00925  | 0.0286  | 1.54641 | 0.0161   | 0.0496  |
| <b>1110038B12Rik</b> | 1.91722 | 5.00E-05 | 0.00032 | 2.71314 | 5.00E-05 | 0.00038 |
| <b>Cd36</b>          | 1.91563 | 5.00E-05 | 0.00032 | 1.10695 | 0.00825  | 0.02918 |
| <b>Hectd1</b>        | 1.91537 | 5.00E-05 | 0.00032 | 3.14037 | 5.00E-05 | 0.00038 |
| <b>Hip1r</b>         | 1.91263 | 0.00045  | 0.00224 | 2.26398 | 5.00E-05 | 0.00038 |
| <b>Pttg1ip</b>       | 1.90767 | 5.00E-05 | 0.00032 | 2.896   | 5.00E-05 | 0.00038 |
| <b>Tmem38b</b>       | 1.90273 | 5.00E-05 | 0.00032 | 1.22027 | 5.00E-05 | 0.00038 |
| <b>Utp14a</b>        | 1.90172 | 5.00E-05 | 0.00032 | 1.97825 | 5.00E-05 | 0.00038 |
| <b>Psmc2</b>         | 1.90155 | 5.00E-05 | 0.00032 | 1.43985 | 5.00E-05 | 0.00038 |
| <b>Phyhip1</b>       | 1.89939 | 5.00E-05 | 0.00032 | 1.32375 | 0.00665  | 0.02443 |
| <b>Sh3bp2</b>        | 1.89689 | 5.00E-05 | 0.00032 | 1.90995 | 5.00E-05 | 0.00038 |
| <b>Trmt1</b>         | 1.89463 | 5.00E-05 | 0.00032 | 1.90777 | 5.00E-05 | 0.00038 |
| <b>Psemb2</b>        | 1.89453 | 5.00E-05 | 0.00032 | 1.43973 | 5.00E-05 | 0.00038 |
| <b>Psmc4</b>         | 1.89447 | 5.00E-05 | 0.00032 | 1.30204 | 0.00015  | 0.00102 |
| <b>Zfp839</b>        | 1.89402 | 5.00E-05 | 0.00032 | 2.27149 | 5.00E-05 | 0.00038 |
| <b>Fam59a</b>        | 1.88888 | 5.00E-05 | 0.00032 | 2.46179 | 5.00E-05 | 0.00038 |
| <b>Ing1</b>          | 1.8861  | 5.00E-05 | 0.00032 | 2.57187 | 5.00E-05 | 0.00038 |
| <b>Jup</b>           | 1.88562 | 5.00E-05 | 0.00032 | 1.26804 | 5.00E-05 | 0.00038 |
| <b>Dido1</b>         | 1.88541 | 5.00E-05 | 0.00032 | 1.07296 | 0.00085  | 0.00449 |
| <b>Sorbs1</b>        | 1.88539 | 5.00E-05 | 0.00032 | 1.67285 | 5.00E-05 | 0.00038 |
| <b>Bet1l</b>         | 1.88436 | 5.00E-05 | 0.00032 | 1.76029 | 5.00E-05 | 0.00038 |

|                      |         |          |         |         |          |         |
|----------------------|---------|----------|---------|---------|----------|---------|
| <b>1810031K17Rik</b> | 1.88104 | 5.00E-05 | 0.00032 | 2.44699 | 5.00E-05 | 0.00038 |
| <b>Ssh2</b>          | 1.88097 | 5.00E-05 | 0.00032 | 1.28661 | 0.0032   | 0.01343 |
| <b>Mtmr1</b>         | 1.88077 | 5.00E-05 | 0.00032 | 2.00234 | 0.00015  | 0.00102 |
| <b>Ipo13</b>         | 1.8793  | 5.00E-05 | 0.00032 | 1.84009 | 2.00E-04 | 0.00131 |
| <b>Dapk1</b>         | 1.87727 | 5.00E-05 | 0.00032 | 1.53522 | 5.00E-05 | 0.00038 |
| <b>Prosc</b>         | 1.87543 | 5.00E-05 | 0.00032 | 2.13206 | 5.00E-05 | 0.00038 |
| <b>C130022K22Rik</b> | 1.87508 | 5.00E-05 | 0.00032 | 2.21032 | 5.00E-05 | 0.00038 |
| <b>Rrs1</b>          | 1.87501 | 5.00E-05 | 0.00032 | 1.58672 | 5.00E-05 | 0.00038 |
| <b>Slc9a4</b>        | 1.87259 | 5.00E-05 | 0.00032 | 2.39681 | 0.00015  | 0.00102 |
| <b>Rit1</b>          | 1.87166 | 5.00E-05 | 0.00032 | 1.28338 | 0.00245  | 0.01083 |
| <b>Pqlc1</b>         | 1.86965 | 5.00E-05 | 0.00032 | 1.59215 | 5.00E-05 | 0.00038 |
| <b>Ezh1</b>          | 1.8696  | 5.00E-05 | 0.00032 | 2.4305  | 5.00E-05 | 0.00038 |
| <b>Mapk1ip1</b>      | 1.86847 | 5.00E-05 | 0.00032 | 2.0156  | 0.00025  | 0.00159 |
| <b>Daxx</b>          | 1.86519 | 1.00E-04 | 0.0006  | 2.20967 | 5.00E-05 | 0.00038 |
| <b>Klhl2</b>         | 1.86259 | 5.00E-05 | 0.00032 | 1.67043 | 5.00E-05 | 0.00038 |
| <b>BC031353</b>      | 1.85882 | 5.00E-05 | 0.00032 | 2.24397 | 5.00E-05 | 0.00038 |
| <b>Srfbp1</b>        | 1.8585  | 5.00E-05 | 0.00032 | 1.8661  | 5.00E-05 | 0.00038 |
| <b>Fkbp1</b>         | 1.85776 | 0.0083   | 0.02615 | 2.78293 | 5.00E-05 | 0.00038 |
| <b>Hnrnpf</b>        | 1.85619 | 5.00E-05 | 0.00032 | 1.59648 | 5.00E-05 | 0.00038 |
| <b>Cth</b>           | 1.85464 | 5.00E-05 | 0.00032 | 2.42793 | 5.00E-05 | 0.00038 |
| <b>Sidt2</b>         | 1.85347 | 5.00E-05 | 0.00032 | 2.39309 | 5.00E-05 | 0.00038 |
| <b>Impact</b>        | 1.85248 | 5.00E-05 | 0.00032 | 1.37408 | 5.00E-05 | 0.00038 |
| <b>Fip111</b>        | 1.84997 | 5.00E-05 | 0.00032 | 1.61621 | 0.00085  | 0.00449 |
| <b>D6Wsu116e</b>     | 1.84898 | 5.00E-05 | 0.00032 | 2.07518 | 5.00E-05 | 0.00038 |
| <b>Adprhl2</b>       | 1.84776 | 5.00E-05 | 0.00032 | 1.7154  | 5.00E-05 | 0.00038 |
| <b>Psemb4</b>        | 1.84586 | 5.00E-05 | 0.00032 | 1.19491 | 0.00095  | 0.00492 |
| <b>Slc43a1</b>       | 1.84174 | 5.00E-05 | 0.00032 | 1.69698 | 5.00E-05 | 0.00038 |
| <b>Gsr</b>           | 1.84145 | 5.00E-05 | 0.00032 | 1.34195 | 0.00085  | 0.00449 |
| <b>Sepp1</b>         | 1.84018 | 5.00E-05 | 0.00032 | 1.42787 | 0.00135  | 0.00662 |
| <b>Psemb3</b>        | 1.84013 | 5.00E-05 | 0.00032 | 1.40101 | 5.00E-05 | 0.00038 |
| <b>Cyp4f17</b>       | 1.83978 | 0.00015  | 0.00086 | 2.04116 | 5.00E-05 | 0.00038 |
| <b>Vgll2</b>         | 1.83756 | 5.00E-05 | 0.00032 | 1.29544 | 5.00E-05 | 0.00038 |
| <b>Spata24</b>       | 1.83732 | 5.00E-05 | 0.00032 | 3.08755 | 5.00E-05 | 0.00038 |
| <b>Clip1</b>         | 1.83716 | 5.00E-05 | 0.00032 | 1.29811 | 0.00455  | 0.01797 |
| <b>Lrg1</b>          | 1.83595 | 5.00E-05 | 0.00032 | 2.41353 | 5.00E-05 | 0.00038 |
| <b>Rasa3</b>         | 1.83409 | 5.00E-05 | 0.00032 | 2.22671 | 5.00E-05 | 0.00038 |
| <b>Fam107a</b>       | 1.83292 | 1.00E-04 | 0.0006  | 3.32117 | 5.00E-05 | 0.00038 |
| <b>Ccdc162</b>       | 1.83228 | 0.00405  | 0.01436 | 2.8775  | 4.00E-04 | 0.00237 |
| <b>Snx10</b>         | 1.83055 | 5.00E-05 | 0.00032 | 0.98961 | 0.01515  | 0.04737 |
| <b>Gabbr2</b>        | 1.82876 | 0.008    | 0.02536 | 2.28179 | 4.00E-04 | 0.00237 |
| <b>Sdcbp2</b>        | 1.82802 | 0.00865  | 0.02703 | 2.33201 | 0.0012   | 0.006   |

|                      |         |          |         |         |          |         |
|----------------------|---------|----------|---------|---------|----------|---------|
| <b>Olfm1</b>         | 1.82691 | 5.00E-05 | 0.00032 | 1.24734 | 0.0012   | 0.006   |
| <b>Bri3</b>          | 1.82392 | 5.00E-05 | 0.00032 | 1.69262 | 0.00125  | 0.00621 |
| <b>Ppargc1a</b>      | 1.82272 | 5.00E-05 | 0.00032 | 3.53957 | 5.00E-05 | 0.00038 |
| <b>C130039O16Rik</b> | 1.82169 | 5.00E-05 | 0.00032 | 2.21133 | 5.00E-05 | 0.00038 |
| <b>Rbm34</b>         | 1.81725 | 5.00E-05 | 0.00032 | 1.14518 | 6.00E-04 | 0.00335 |
| <b>Dnttip1</b>       | 1.81569 | 5.00E-05 | 0.00032 | 1.7937  | 5.00E-05 | 0.00038 |
| <b>Cirbp</b>         | 1.81384 | 5.00E-05 | 0.00032 | 2.71334 | 5.00E-05 | 0.00038 |
| <b>Piga</b>          | 1.8105  | 5.00E-05 | 0.00032 | 2.55316 | 5.00E-05 | 0.00038 |
| <b>Scyl3</b>         | 1.80777 | 5.00E-05 | 0.00032 | 1.58068 | 0.0017   | 0.00803 |
| <b>Txn1</b>          | 1.80758 | 5.00E-05 | 0.00032 | 1.61373 | 5.00E-05 | 0.00038 |
| <b>Gadd45a</b>       | 1.80631 | 5.00E-05 | 0.00032 | 1.51974 | 5.00E-05 | 0.00038 |
| <b>Fam13c</b>        | 1.80181 | 5.00E-05 | 0.00032 | 1.28429 | 0.00255  | 0.01114 |
| <b>9530068E07Rik</b> | 1.80135 | 5.00E-05 | 0.00032 | 1.64603 | 5.00E-05 | 0.00038 |
| <b>Psma5</b>         | 1.80126 | 5.00E-05 | 0.00032 | 1.11961 | 5.00E-05 | 0.00038 |
| <b>Gpr56</b>         | 1.80012 | 5.00E-05 | 0.00032 | 1.57123 | 5.00E-05 | 0.00038 |
| <b>Pgf</b>           | 1.79765 | 5.00E-05 | 0.00032 | 3.73028 | 5.00E-05 | 0.00038 |
| <b>Rbm3</b>          | 1.79583 | 5.00E-05 | 0.00032 | 2.24371 | 5.00E-05 | 0.00038 |
| <b>Vars</b>          | 1.79277 | 5.00E-05 | 0.00032 | 1.69795 | 5.00E-05 | 0.00038 |
| <b>Zkscan17</b>      | 1.78826 | 5.00E-05 | 0.00032 | 2.13515 | 5.00E-05 | 0.00038 |
| <b>Zfp593</b>        | 1.78804 | 0.0023   | 0.00899 | 1.59435 | 0.0149   | 0.04671 |
| <b>Grhl1</b>         | 1.78206 | 3.00E-04 | 0.00158 | 2.60738 | 0.00045  | 0.00262 |
| <b>Upp1</b>          | 1.78148 | 0.00675  | 0.02206 | 2.99793 | 0.0011   | 0.00557 |
| <b>Rorc</b>          | 1.77743 | 5.00E-05 | 0.00032 | 2.5349  | 5.00E-05 | 0.00038 |
| <b>Als2</b>          | 1.77625 | 5.00E-05 | 0.00032 | 0.92749 | 0.0021   | 0.00957 |
| <b>Dcaf10</b>        | 1.77371 | 5.00E-05 | 0.00032 | 1.84549 | 5.00E-05 | 0.00038 |
| <b>Adarb1</b>        | 1.77363 | 5.00E-05 | 0.00032 | 1.95155 | 5.00E-05 | 0.00038 |
| <b>Sod1</b>          | 1.77342 | 5.00E-05 | 0.00032 | 1.95424 | 5.00E-05 | 0.00038 |
| <b>Coasy</b>         | 1.77114 | 5.00E-05 | 0.00032 | 1.33392 | 0.00045  | 0.00262 |
| <b>Tollip</b>        | 1.77073 | 5.00E-05 | 0.00032 | 2.08782 | 5.00E-05 | 0.00038 |
| <b>Tbx6</b>          | 1.76765 | 0.00135  | 0.00572 | 2.69612 | 5.00E-05 | 0.00038 |
| <b>Ttll11</b>        | 1.76722 | 2.00E-04 | 0.00111 | 1.9742  | 2.00E-04 | 0.00131 |
| <b>Dpm1</b>          | 1.76661 | 5.00E-05 | 0.00032 | 1.41959 | 0.012    | 0.03937 |
| <b>Spred3</b>        | 1.76458 | 5.00E-05 | 0.00032 | 2.95132 | 5.00E-05 | 0.00038 |
| <b>Dnajb6</b>        | 1.76395 | 5.00E-05 | 0.00032 | 1.67903 | 5.00E-05 | 0.00038 |
| <b>Nt5c3</b>         | 1.76302 | 5.00E-05 | 0.00032 | 1.30988 | 1.00E-04 | 0.00072 |
| <b>Dedd2</b>         | 1.76173 | 5.00E-05 | 0.00032 | 2.17562 | 5.00E-05 | 0.00038 |
| <b>D19Wsu162e</b>    | 1.76073 | 5.00E-05 | 0.00032 | 1.96098 | 5.00E-05 | 0.00038 |
| <b>Eda2r</b>         | 1.75965 | 5.00E-05 | 0.00032 | -1.1929 | 0.00095  | 0.00492 |
| <b>2210403K04Rik</b> | 1.755   | 5.00E-05 | 0.00032 | 1.38742 | 0.00105  | 0.00534 |
| <b>Tead4</b>         | 1.75483 | 5.00E-05 | 0.00032 | 2.95736 | 5.00E-05 | 0.00038 |
| <b>E130012A19Rik</b> | 1.75389 | 5.00E-05 | 0.00032 | 3.906   | 5.00E-05 | 0.00038 |

|                      |         |          |         |         |          |         |
|----------------------|---------|----------|---------|---------|----------|---------|
| <b>Psma1</b>         | 1.75355 | 5.00E-05 | 0.00032 | 1.06064 | 0.00135  | 0.00662 |
| <b>Slc3a2</b>        | 1.75153 | 5.00E-05 | 0.00032 | 1.54756 | 5.00E-05 | 0.00038 |
| <b>Snhg7</b>         | 1.75033 | 0.00025  | 0.00135 | 1.93899 | 5.00E-05 | 0.00038 |
| <b>2210021J22Rik</b> | 1.74911 | 5.00E-05 | 0.00032 | 1.78868 | 5.00E-05 | 0.00038 |
| <b>Abra</b>          | 1.74743 | 5.00E-05 | 0.00032 | 2.57435 | 5.00E-05 | 0.00038 |
| <b>Nr4a3</b>         | 1.74698 | 5.00E-05 | 0.00032 | 2.27648 | 5.00E-05 | 0.00038 |
| <b>Naglu</b>         | 1.74441 | 5.00E-05 | 0.00032 | 1.82114 | 5.00E-05 | 0.00038 |
| <b>Gpatch1</b>       | 1.73757 | 5.00E-05 | 0.00032 | 1.67736 | 5.00E-05 | 0.00038 |
| <b>Elac1</b>         | 1.73707 | 5.00E-05 | 0.00032 | 1.31025 | 5.00E-05 | 0.00038 |
| <b>Phc3</b>          | 1.73668 | 5.00E-05 | 0.00032 | 1.31957 | 5.00E-05 | 0.00038 |
| <b>Psma2</b>         | 1.73356 | 5.00E-05 | 0.00032 | 1.03097 | 0.00255  | 0.01114 |
| <b>Nol3</b>          | 1.73209 | 5.00E-05 | 0.00032 | 1.11768 | 0.0073   | 0.02642 |
| <b>Naca</b>          | 1.72954 | 5.00E-05 | 0.00032 | 1.72059 | 0.00015  | 0.00102 |
| <b>Gramd3</b>        | 1.72877 | 5.00E-05 | 0.00032 | 1.67112 | 5.00E-05 | 0.00038 |
| <b>Rora</b>          | 1.72851 | 5.00E-05 | 0.00032 | 2.23751 | 5.00E-05 | 0.00038 |
| <b>Zbtb10</b>        | 1.72587 | 5.00E-05 | 0.00032 | 2.29818 | 5.00E-05 | 0.00038 |
| <b>Klf2</b>          | 1.72337 | 5.00E-05 | 0.00032 | 1.16096 | 3.00E-04 | 0.00184 |
| <b>Gm9967</b>        | 1.72275 | 0.00015  | 0.00086 | 2.3906  | 5.00E-05 | 0.00038 |
| <b>Ppfibp1</b>       | 1.72177 | 5.00E-05 | 0.00032 | 1.36804 | 0.001    | 0.00513 |
| <b>Dnttip2</b>       | 1.72136 | 5.00E-05 | 0.00032 | 2.09318 | 5.00E-05 | 0.00038 |
| <b>2810474O19Rik</b> | 1.72042 | 5.00E-05 | 0.00032 | 2.81109 | 5.00E-05 | 0.00038 |
| <b>Nfkbia</b>        | 1.71992 | 5.00E-05 | 0.00032 | 1.95812 | 5.00E-05 | 0.00038 |
| <b>Agfg2</b>         | 1.71986 | 5.00E-05 | 0.00032 | 2.31654 | 5.00E-05 | 0.00038 |
| <b>Prr14</b>         | 1.71964 | 5.00E-05 | 0.00032 | 1.5837  | 5.00E-05 | 0.00038 |
| <b>Bin3</b>          | 1.71945 | 0.0033   | 0.01213 | 2.35696 | 0.00175  | 0.00822 |
| <b>Mllt11</b>        | 1.71937 | 5.00E-05 | 0.00032 | -1.0148 | 0.00845  | 0.02973 |
| <b>Sfpq</b>          | 1.71619 | 5.00E-05 | 0.00032 | 2.08716 | 5.00E-05 | 0.00038 |
| <b>Bsdc1</b>         | 1.7158  | 5.00E-05 | 0.00032 | 1.67236 | 5.00E-05 | 0.00038 |
| <b>Lpl</b>           | 1.71528 | 5.00E-05 | 0.00032 | 1.92885 | 5.00E-05 | 0.00038 |
| <b>Ubfd1</b>         | 1.71485 | 5.00E-05 | 0.00032 | 0.83735 | 0.0145   | 0.04576 |
| <b>Slc10a3</b>       | 1.71444 | 5.00E-05 | 0.00032 | 1.61879 | 5.00E-05 | 0.00038 |
| <b>Erbp2ip</b>       | 1.71421 | 5.00E-05 | 0.00032 | 2.29668 | 5.00E-05 | 0.00038 |
| <b>Cda</b>           | 1.71398 | 0.00045  | 0.00224 | 1.39195 | 0.0126   | 0.04097 |
| <b>Zfand5</b>        | 1.71228 | 5.00E-05 | 0.00032 | 1.4928  | 0.00015  | 0.00102 |
| <b>2410003K15Rik</b> | 1.70959 | 5.00E-05 | 0.00032 | 1.69131 | 5.00E-05 | 0.00038 |
| <b>Adrm1</b>         | 1.70695 | 5.00E-05 | 0.00032 | 1.62438 | 5.00E-05 | 0.00038 |
| <b>Agap2</b>         | 1.70638 | 5.00E-05 | 0.00032 | 1.2812  | 0.00015  | 0.00102 |
| <b>Tax1bp1</b>       | 1.70585 | 5.00E-05 | 0.00032 | 1.99651 | 5.00E-05 | 0.00038 |
| <b>4930429F24Rik</b> | 1.70511 | 5.00E-05 | 0.00032 | 0.74833 | 0.013    | 0.04201 |
| <b>Atf4</b>          | 1.70341 | 5.00E-05 | 0.00032 | 1.82557 | 5.00E-05 | 0.00038 |
| <b>Hnrnpa1</b>       | 1.7017  | 5.00E-05 | 0.00032 | 1.72226 | 5.00E-05 | 0.00038 |

|                      |         |          |         |         |          |         |
|----------------------|---------|----------|---------|---------|----------|---------|
| <b>St8sia6</b>       | 1.70015 | 0.00085  | 0.00387 | 1.27142 | 0.0073   | 0.02642 |
| <b>Sec23ip</b>       | 1.69989 | 5.00E-05 | 0.00032 | 1.3177  | 5.00E-05 | 0.00038 |
| <b>Prpf6</b>         | 1.69749 | 5.00E-05 | 0.00032 | 1.64147 | 0.0076   | 0.02728 |
| <b>Sh2d3c</b>        | 1.69739 | 5.00E-05 | 0.00032 | 1.72619 | 5.00E-05 | 0.00038 |
| <b>Arnt</b>          | 1.69726 | 5.00E-05 | 0.00032 | 1.61549 | 5.00E-05 | 0.00038 |
| <b>Spata5</b>        | 1.69208 | 0.00135  | 0.00572 | 2.07635 | 4.00E-04 | 0.00237 |
| <b>Pex16</b>         | 1.69111 | 5.00E-05 | 0.00032 | 1.72052 | 5.00E-05 | 0.00038 |
| <b>Vsig2</b>         | 1.69013 | 5.00E-05 | 0.00032 | 1.80242 | 5.00E-05 | 0.00038 |
| <b>Mecp2</b>         | 1.68826 | 5.00E-05 | 0.00032 | 2.91484 | 5.00E-05 | 0.00038 |
| <b>Shb</b>           | 1.6879  | 3.00E-04 | 0.00158 | 1.20886 | 0.0145   | 0.04576 |
| <b>Cldn15</b>        | 1.68689 | 0.00055  | 0.00266 | 1.92138 | 5.00E-05 | 0.00038 |
| <b>Ngfr</b>          | 1.68661 | 5.00E-05 | 0.00032 | -1.9362 | 2.00E-04 | 0.00131 |
| <b>Selenbp1</b>      | 1.68546 | 5.00E-05 | 0.00032 | 2.66013 | 5.00E-05 | 0.00038 |
| <b>Rsl1d1</b>        | 1.68387 | 5.00E-05 | 0.00032 | 1.4092  | 5.00E-05 | 0.00038 |
| <b>Mak16</b>         | 1.68373 | 5.00E-05 | 0.00032 | 1.43867 | 2.00E-04 | 0.00131 |
| <b>Eil</b>           | 1.68297 | 5.00E-05 | 0.00032 | 2.66907 | 5.00E-05 | 0.00038 |
| <b>Por</b>           | 1.68116 | 5.00E-05 | 0.00032 | 2.17994 | 5.00E-05 | 0.00038 |
| <b>Prodh</b>         | 1.67999 | 1.00E-04 | 0.0006  | 2.53003 | 5.00E-04 | 0.00287 |
| <b>Pitx3</b>         | 1.67718 | 0.00315  | 0.01165 | 1.51217 | 5.00E-04 | 0.00287 |
| <b>Slc25a33</b>      | 1.67649 | 5.00E-05 | 0.00032 | 3.81456 | 5.00E-05 | 0.00038 |
| <b>Dnajb2</b>        | 1.6732  | 5.00E-05 | 0.00032 | 1.54424 | 5.00E-05 | 0.00038 |
| <b>Nub1</b>          | 1.67203 | 5.00E-05 | 0.00032 | 2.07961 | 5.00E-05 | 0.00038 |
| <b>Pi4k2a</b>        | 1.67084 | 5.00E-05 | 0.00032 | 2.77594 | 5.00E-05 | 0.00038 |
| <b>Hipk1</b>         | 1.66979 | 5.00E-05 | 0.00032 | 1.67662 | 5.00E-05 | 0.00038 |
| <b>Mgst1</b>         | 1.6642  | 5.00E-05 | 0.00032 | 2.07863 | 5.00E-05 | 0.00038 |
| <b>Smcr8</b>         | 1.66351 | 5.00E-05 | 0.00032 | 1.20529 | 3.00E-04 | 0.00184 |
| <b>Agt</b>           | 1.65985 | 5.00E-05 | 0.00032 | 3.7853  | 5.00E-05 | 0.00038 |
| <b>H3f3b</b>         | 1.65907 | 5.00E-05 | 0.00032 | 1.28814 | 5.00E-05 | 0.00038 |
| <b>Zrsr1</b>         | 1.65671 | 5.00E-05 | 0.00032 | 2.12553 | 0.0011   | 0.00557 |
| <b>Csnk2a2</b>       | 1.65655 | 5.00E-05 | 0.00032 | 1.77739 | 5.00E-05 | 0.00038 |
| <b>Arhgef37</b>      | 1.65471 | 5.00E-05 | 0.00032 | 3.04769 | 5.00E-05 | 0.00038 |
| <b>Gm13068</b>       | 1.65469 | 0.01205  | 0.03542 | 4.0537  | 0.001    | 0.00513 |
| <b>Slc25a38</b>      | 1.65368 | 5.00E-05 | 0.00032 | 1.79448 | 5.00E-05 | 0.00038 |
| <b>Mms19</b>         | 1.65347 | 5.00E-05 | 0.00032 | 1.84056 | 5.00E-05 | 0.00038 |
| <b>Usp14</b>         | 1.65274 | 5.00E-05 | 0.00032 | 0.96808 | 0.01555  | 0.0483  |
| <b>Zfp874b</b>       | 1.65113 | 5.00E-05 | 0.00032 | 1.03188 | 0.00225  | 0.0101  |
| <b>Lpin1</b>         | 1.64924 | 5.00E-05 | 0.00032 | 2.18702 | 5.00E-05 | 0.00038 |
| <b>C030046E11Rik</b> | 1.64906 | 5.00E-05 | 0.00032 | 1.59123 | 1.00E-04 | 0.00072 |
| <b>Abcb1b</b>        | 1.63956 | 5.00E-05 | 0.00032 | 1.74483 | 5.00E-05 | 0.00038 |
| <b>Anxa4</b>         | 1.63943 | 5.00E-05 | 0.00032 | 1.17081 | 1.00E-04 | 0.00072 |
| <b>Stt3b</b>         | 1.63905 | 5.00E-05 | 0.00032 | 0.8274  | 0.01185  | 0.03901 |



|                  |         |          |         |         |          |         |
|------------------|---------|----------|---------|---------|----------|---------|
| <b>Flcn</b>      | 1.63711 | 5.00E-05 | 0.00032 | 1.66503 | 5.00E-05 | 0.00038 |
| <b>Clint1</b>    | 1.6366  | 5.00E-05 | 0.00032 | 1.87314 | 5.00E-05 | 0.00038 |
| <b>Sema7a</b>    | 1.63389 | 5.00E-05 | 0.00032 | 1.55684 | 5.00E-05 | 0.00038 |
| <b>Pde7a</b>     | 1.63282 | 5.00E-05 | 0.00032 | 1.81402 | 1.00E-04 | 0.00072 |
| <b>Zdhhc23</b>   | 1.63245 | 3.00E-04 | 0.00158 | 2.66982 | 5.00E-05 | 0.00038 |
| <b>Vps54</b>     | 1.63171 | 5.00E-05 | 0.00032 | 1.74153 | 5.00E-05 | 0.00038 |
| <b>Bcl7b</b>     | 1.62936 | 5.00E-05 | 0.00032 | 1.69352 | 5.00E-05 | 0.00038 |
| <b>Csda</b>      | 1.62836 | 5.00E-05 | 0.00032 | 1.8923  | 4.00E-04 | 0.00237 |
| <b>Slc25a28</b>  | 1.62828 | 5.00E-05 | 0.00032 | 2.89399 | 5.00E-05 | 0.00038 |
| <b>Ube2o</b>     | 1.6279  | 5.00E-05 | 0.00032 | 0.92944 | 0.0106   | 0.03569 |
| <b>Ctsd</b>      | 1.62678 | 5.00E-05 | 0.00032 | 1.90732 | 5.00E-05 | 0.00038 |
| <b>Kat5</b>      | 1.62663 | 5.00E-05 | 0.00032 | 1.21843 | 0.00065  | 0.00359 |
| <b>Mfsd4</b>     | 1.62547 | 5.00E-05 | 0.00032 | 1.96672 | 0.00715  | 0.02598 |
| <b>Ddx27</b>     | 1.62341 | 0.0067   | 0.02193 | 2.08366 | 0.00045  | 0.00262 |
| <b>Myo18b</b>    | 1.62135 | 5.00E-05 | 0.00032 | 1.09    | 0.0119   | 0.03914 |
| <b>Lrrc2</b>     | 1.62132 | 5.00E-05 | 0.00032 | 1.07056 | 0.0021   | 0.00957 |
| <b>Amn1</b>      | 1.62132 | 5.00E-05 | 0.00032 | 1.49789 | 8.00E-04 | 0.00427 |
| <b>Insig1</b>    | 1.62076 | 5.00E-05 | 0.00032 | 1.94664 | 5.00E-05 | 0.00038 |
| <b>Dusp4</b>     | 1.61961 | 0.0037   | 0.01329 | 3.11827 | 5.00E-05 | 0.00038 |
| <b>Pias4</b>     | 1.61952 | 0.0018   | 0.00733 | 2.05721 | 0.001    | 0.00513 |
| <b>Zfp869</b>    | 1.61906 | 5.00E-05 | 0.00032 | 1.55938 | 5.00E-05 | 0.00038 |
| <b>Fas</b>       | 1.6166  | 5.00E-05 | 0.00032 | 2.81808 | 5.00E-05 | 0.00038 |
| <b>Clcc1</b>     | 1.6125  | 8.00E-04 | 0.00368 | 1.92956 | 0.0012   | 0.006   |
| <b>Fam3a</b>     | 1.61214 | 5.00E-05 | 0.00032 | 1.14306 | 0.00255  | 0.01114 |
| <b>Net1</b>      | 1.6121  | 5.00E-05 | 0.00032 | 1.83726 | 5.00E-05 | 0.00038 |
| <b>Smg1</b>      | 1.61145 | 5.00E-05 | 0.00032 | 2.31497 | 5.00E-05 | 0.00038 |
| <b>Fiz1</b>      | 1.61027 | 5.00E-05 | 0.00032 | 1.49995 | 5.00E-05 | 0.00038 |
| <b>Nop14</b>     | 1.60944 | 0.01175  | 0.03471 | 1.81502 | 0.0161   | 0.0496  |
| <b>Taf8</b>      | 1.60761 | 5.00E-05 | 0.00032 | 1.57491 | 5.00E-05 | 0.00038 |
| <b>Hp1bp3</b>    | 1.60669 | 5.00E-05 | 0.00032 | 1.38091 | 5.00E-05 | 0.00038 |
| <b>Stk11ip</b>   | 1.60585 | 5.00E-05 | 0.00032 | 2.40342 | 5.00E-05 | 0.00038 |
| <b>Coro6</b>     | 1.60579 | 5.00E-05 | 0.00032 | 1.5299  | 4.00E-04 | 0.00237 |
| <b>Kank1</b>     | 1.6056  | 5.00E-05 | 0.00032 | 2.38866 | 5.00E-05 | 0.00038 |
| <b>Pfkfb3</b>    | 1.60449 | 5.00E-05 | 0.00032 | 1.68554 | 2.00E-04 | 0.00131 |
| <b>Ank3</b>      | 1.60023 | 5.00E-05 | 0.00032 | 1.47211 | 5.00E-05 | 0.00038 |
| <b>Psmc1</b>     | 1.59975 | 5.00E-05 | 0.00032 | 1.43893 | 1.00E-04 | 0.00072 |
| <b>Crtc2</b>     | 1.59906 | 5.00E-05 | 0.00032 | 1.78714 | 5.00E-05 | 0.00038 |
| <b>BC005537</b>  | 1.59698 | 5.00E-05 | 0.00032 | 1.4524  | 5.00E-05 | 0.00038 |
| <b>Cul4b</b>     | 1.59465 | 5.00E-05 | 0.00032 | 1.67646 | 5.00E-05 | 0.00038 |
| <b>Uhrf1bp1l</b> | 1.59326 | 5.00E-05 | 0.00032 | 2.23043 | 5.00E-05 | 0.00038 |
| <b>Med13l</b>    | 1.59076 | 5.00E-05 | 0.00032 | 2.00274 | 5.00E-05 | 0.00038 |

|                      |         |          |         |         |          |         |
|----------------------|---------|----------|---------|---------|----------|---------|
| <b>Rabggtb</b>       | 1.59002 | 5.00E-05 | 0.00032 | 1.9181  | 5.00E-05 | 0.00038 |
| <b>Idh2</b>          | 1.58925 | 5.00E-05 | 0.00032 | 2.8122  | 5.00E-05 | 0.00038 |
| <b>Arfgef2</b>       | 1.58818 | 5.00E-05 | 0.00032 | 2.19217 | 5.00E-05 | 0.00038 |
| <b>Optn</b>          | 1.58804 | 5.00E-05 | 0.00032 | 1.86189 | 5.00E-05 | 0.00038 |
| <b>Zfp498</b>        | 1.58575 | 5.00E-05 | 0.00032 | 1.8546  | 5.00E-05 | 0.00038 |
| <b>Tigd2</b>         | 1.58373 | 5.00E-05 | 0.00032 | 2.1124  | 5.00E-05 | 0.00038 |
| <b>Ubqln1</b>        | 1.58317 | 5.00E-05 | 0.00032 | 0.96542 | 0.0026   | 0.01132 |
| <b>Ranbp2</b>        | 1.58279 | 5.00E-05 | 0.00032 | 1.30068 | 0.00015  | 0.00102 |
| <b>Nsfl1c</b>        | 1.5827  | 5.00E-05 | 0.00032 | 1.4333  | 1.00E-04 | 0.00072 |
| <b>Ggnbp2</b>        | 1.58064 | 5.00E-05 | 0.00032 | 2.00921 | 5.00E-05 | 0.00038 |
| <b>Mfhas1</b>        | 1.57922 | 2.00E-04 | 0.00111 | 2.5481  | 5.00E-05 | 0.00038 |
| <b>Inadl</b>         | 1.57832 | 0.01045  | 0.03157 | 1.96721 | 0.00015  | 0.00102 |
| <b>Mphosph10</b>     | 1.57634 | 5.00E-05 | 0.00032 | 2.17337 | 5.00E-05 | 0.00038 |
| <b>9430038I01Rik</b> | 1.57585 | 1.00E-04 | 0.0006  | 1.76268 | 5.00E-05 | 0.00038 |
| <b>2310015A10Rik</b> | 1.57382 | 5.00E-05 | 0.00032 | 1.42868 | 5.00E-05 | 0.00038 |
| <b>Psm6</b>          | 1.57369 | 5.00E-05 | 0.00032 | 0.95178 | 0.00385  | 0.01572 |
| <b>Cep120</b>        | 1.57328 | 5.00E-05 | 0.00032 | 1.34617 | 0.00685  | 0.02504 |
| <b>Chfr</b>          | 1.573   | 5.00E-05 | 0.00032 | 1.52497 | 5.00E-05 | 0.00038 |
| <b>Zfyve27</b>       | 1.57278 | 0.00015  | 0.00086 | 1.43722 | 0.00155  | 0.00742 |
| <b>Wdr43</b>         | 1.57248 | 5.00E-05 | 0.00032 | 1.69764 | 5.00E-05 | 0.00038 |
| <b>Lrrc47</b>        | 1.57219 | 0.0022   | 0.00865 | 1.88544 | 0.0014   | 0.00681 |
| <b>Mier1</b>         | 1.56371 | 5.00E-05 | 0.00032 | 2.31129 | 5.00E-05 | 0.00038 |
| <b>Fbrs</b>          | 1.56272 | 5.00E-05 | 0.00032 | 1.48057 | 5.00E-05 | 0.00038 |
| <b>Fmo2</b>          | 1.56185 | 5.00E-05 | 0.00032 | 2.76634 | 5.00E-05 | 0.00038 |
| <b>Trim39</b>        | 1.56082 | 5.00E-05 | 0.00032 | 1.74957 | 5.00E-05 | 0.00038 |
| <b>Adcy2</b>         | 1.5601  | 5.00E-05 | 0.00032 | 1.41213 | 0.00025  | 0.00159 |
| <b>Larp4</b>         | 1.55941 | 5.00E-05 | 0.00032 | 1.33227 | 5.00E-05 | 0.00038 |
| <b>Psm1</b>          | 1.55896 | 5.00E-05 | 0.00032 | 1.7034  | 5.00E-05 | 0.00038 |
| <b>Stat3</b>         | 1.5549  | 5.00E-05 | 0.00032 | 1.07069 | 0.0022   | 0.00992 |
| <b>Psm1</b>          | 1.55404 | 5.00E-05 | 0.00032 | 1.00565 | 0.00305  | 0.01292 |
| <b>Gnl2</b>          | 1.55376 | 5.00E-05 | 0.00032 | 1.44701 | 5.00E-05 | 0.00038 |
| <b>Dazap2</b>        | 1.55292 | 5.00E-05 | 0.00032 | 1.53889 | 5.00E-05 | 0.00038 |
| <b>Sema3g</b>        | 1.55084 | 5.00E-05 | 0.00032 | 1.16232 | 2.00E-04 | 0.00131 |
| <b>Rnf181</b>        | 1.5496  | 5.00E-05 | 0.00032 | 1.20884 | 0.0023   | 0.01029 |
| <b>Rad23b</b>        | 1.54923 | 5.00E-05 | 0.00032 | 1.02497 | 0.00305  | 0.01292 |
| <b>Acvr1b</b>        | 1.54699 | 5.00E-05 | 0.00032 | 2.18934 | 5.00E-05 | 0.00038 |
| <b>Nrgn</b>          | 1.5446  | 0.007    | 0.02273 | 1.59195 | 0.0011   | 0.00557 |
| <b>Cables1</b>       | 1.54181 | 2.00E-04 | 0.00111 | 1.85482 | 5.00E-05 | 0.00038 |
| <b>Notch4</b>        | 1.54016 | 0.00085  | 0.00387 | 1.09683 | 0.00595  | 0.02226 |
| <b>Herpud2</b>       | 1.53896 | 5.00E-05 | 0.00032 | 1.32441 | 5.00E-05 | 0.00038 |
| <b>Lrrc59</b>        | 1.5382  | 5.00E-05 | 0.00032 | 1.13299 | 0.005    | 0.01934 |

|                      |         |          |         |         |          |         |
|----------------------|---------|----------|---------|---------|----------|---------|
| <b>Rlim</b>          | 1.5378  | 5.00E-05 | 0.00032 | 1.34748 | 5.00E-05 | 0.00038 |
| <b>Ubap1</b>         | 1.53729 | 1.00E-04 | 0.0006  | 1.46066 | 0.00815  | 0.0289  |
| <b>Zscan21</b>       | 1.53699 | 5.00E-05 | 0.00032 | 1.04196 | 8.00E-04 | 0.00427 |
| <b>Foxk1</b>         | 1.53507 | 5.00E-05 | 0.00032 | 1.42224 | 5.00E-05 | 0.00038 |
| <b>Phax</b>          | 1.53466 | 5.00E-05 | 0.00032 | 1.69594 | 0.00285  | 0.01222 |
| <b>Fubp1</b>         | 1.53368 | 5.00E-05 | 0.00032 | 1.33389 | 0.00015  | 0.00102 |
| <b>Echs1</b>         | 1.5334  | 5.00E-05 | 0.00032 | 1.31989 | 2.00E-04 | 0.00131 |
| <b>Clpx</b>          | 1.53076 | 5.00E-05 | 0.00032 | 1.47825 | 1.00E-04 | 0.00072 |
| <b>Cul1</b>          | 1.53069 | 5.00E-05 | 0.00032 | 1.44751 | 0.0014   | 0.00681 |
| <b>Adamts8</b>       | 1.52865 | 5.00E-05 | 0.00032 | -3.7255 | 5.00E-05 | 0.00038 |
| <b>Psm12</b>         | 1.52743 | 5.00E-05 | 0.00032 | 1.3461  | 0.00025  | 0.00159 |
| <b>Smad1</b>         | 1.52714 | 5.00E-05 | 0.00032 | 1.36766 | 5.00E-05 | 0.00038 |
| <b>Klhl24</b>        | 1.52488 | 5.00E-05 | 0.00032 | 1.20322 | 0.0013   | 0.00641 |
| <b>Poldip3</b>       | 1.52479 | 5.00E-05 | 0.00032 | 0.99972 | 0.00205  | 0.00937 |
| <b>Hrct1</b>         | 1.52424 | 0.00045  | 0.00224 | 1.67293 | 0.00045  | 0.00262 |
| <b>Cerk</b>          | 1.52399 | 5.00E-05 | 0.00032 | 1.70521 | 5.00E-05 | 0.00038 |
| <b>Wdr5</b>          | 1.51966 | 5.00E-05 | 0.00032 | 1.33215 | 5.00E-05 | 0.00038 |
| <b>Nrf1</b>          | 1.51958 | 1.00E-04 | 0.0006  | 1.31978 | 0.00285  | 0.01222 |
| <b>Dpyd</b>          | 1.51791 | 5.00E-05 | 0.00032 | 2.4178  | 5.00E-05 | 0.00038 |
| <b>Tor1aip1</b>      | 1.51489 | 5.00E-05 | 0.00032 | 1.28152 | 0.00415  | 0.01665 |
| <b>Sult1a1</b>       | 1.51374 | 5.00E-05 | 0.00032 | 1.40668 | 4.00E-04 | 0.00237 |
| <b>BC031781</b>      | 1.51183 | 5.00E-05 | 0.00032 | 1.63619 | 5.00E-05 | 0.00038 |
| <b>Ddi2</b>          | 1.51152 | 5.00E-05 | 0.00032 | 1.38722 | 0.002    | 0.00918 |
| <b>Gna13</b>         | 1.51038 | 5.00E-05 | 0.00032 | 2.42802 | 5.00E-05 | 0.00038 |
| <b>Ap3b1</b>         | 1.51016 | 5.00E-05 | 0.00032 | 1.7052  | 5.00E-05 | 0.00038 |
| <b>Rbm15</b>         | 1.50953 | 5.00E-05 | 0.00032 | 1.22903 | 6.00E-04 | 0.00335 |
| <b>Med10</b>         | 1.50869 | 0.0017   | 0.00699 | 1.61018 | 0.006    | 0.02242 |
| <b>Gm9781</b>        | 1.50776 | 5.00E-05 | 0.00032 | 1.13667 | 3.00E-04 | 0.00184 |
| <b>Psma6</b>         | 1.5072  | 5.00E-05 | 0.00032 | 0.92434 | 0.00505  | 0.01952 |
| <b>Safb2</b>         | 1.50668 | 5.00E-05 | 0.00032 | 1.27813 | 0.0042   | 0.01681 |
| <b>Anapc7</b>        | 1.50658 | 5.00E-05 | 0.00032 | 1.29725 | 1.00E-04 | 0.00072 |
| <b>Utp11l</b>        | 1.50542 | 5.00E-05 | 0.00032 | 1.43268 | 5.00E-05 | 0.00038 |
| <b>Pawr</b>          | 1.50472 | 0.00025  | 0.00135 | 1.2186  | 0.0057   | 0.0215  |
| <b>2510006D16Rik</b> | 1.50323 | 5.00E-05 | 0.00032 | 1.19606 | 0.0027   | 0.01168 |
| <b>Strn4</b>         | 1.50285 | 5.00E-05 | 0.00032 | 1.05429 | 0.0101   | 0.03434 |
| <b>Sema3f</b>        | 1.50257 | 5.00E-05 | 0.00032 | 1.79146 | 5.00E-05 | 0.00038 |
| <b>Sat1</b>          | 1.5018  | 5.00E-05 | 0.00032 | 2.10294 | 5.00E-05 | 0.00038 |
| <b>Golga5</b>        | 1.50128 | 5.00E-05 | 0.00032 | 1.38344 | 5.00E-05 | 0.00038 |
| <b>Gm1614</b>        | 1.4979  | 5.00E-05 | 0.00032 | 1.07162 | 4.00E-04 | 0.00237 |
| <b>Slc7a6</b>        | 1.49766 | 5.00E-05 | 0.00032 | 1.09795 | 2.00E-04 | 0.00131 |
| <b>Lrrc8d</b>        | 1.49654 | 5.00E-05 | 0.00032 | 1.9703  | 5.00E-05 | 0.00038 |

|                      |         |          |         |         |          |         |
|----------------------|---------|----------|---------|---------|----------|---------|
| <b>Fnbp1l</b>        | 1.49588 | 0.00025  | 0.00135 | 1.22615 | 0.0041   | 0.0165  |
| <b>Piwil2</b>        | 1.49163 | 0.00015  | 0.00086 | 1.87782 | 5.00E-05 | 0.00038 |
| <b>Luc7l</b>         | 1.49064 | 5.00E-05 | 0.00032 | 1.70378 | 5.00E-05 | 0.00038 |
| <b>Eif4a1</b>        | 1.48986 | 5.00E-05 | 0.00032 | 1.53611 | 5.00E-05 | 0.00038 |
| <b>Irak1bp1</b>      | 1.48968 | 5.00E-05 | 0.00032 | 1.4461  | 5.00E-05 | 0.00038 |
| <b>Tmcc3</b>         | 1.48892 | 5.00E-05 | 0.00032 | 1.54093 | 5.00E-05 | 0.00038 |
| <b>Psmc3</b>         | 1.48817 | 5.00E-05 | 0.00032 | 1.12175 | 0.0158   | 0.04895 |
| <b>Secisbp2</b>      | 1.48497 | 5.00E-05 | 0.00032 | 1.23287 | 2.00E-04 | 0.00131 |
| <b>Ercc1</b>         | 1.48033 | 0.00035  | 0.00181 | 1.81311 | 2.00E-04 | 0.00131 |
| <b>Tnks</b>          | 1.47537 | 5.00E-05 | 0.00032 | 1.63827 | 5.00E-05 | 0.00038 |
| <b>Cyp27a1</b>       | 1.47535 | 5.00E-05 | 0.00032 | 2.73099 | 5.00E-05 | 0.00038 |
| <b>Tsc1</b>          | 1.47337 | 5.00E-05 | 0.00032 | 1.807   | 5.00E-05 | 0.00038 |
| <b>Mta2</b>          | 1.47259 | 5.00E-05 | 0.00032 | 1.23024 | 5.00E-05 | 0.00038 |
| <b>Calcoco1</b>      | 1.47105 | 5.00E-05 | 0.00032 | 2.14045 | 5.00E-05 | 0.00038 |
| <b>Cndp2</b>         | 1.46904 | 5.00E-05 | 0.00032 | 1.14606 | 0.00015  | 0.00102 |
| <b>Fbxo44</b>        | 1.46874 | 5.00E-05 | 0.00032 | 1.91026 | 5.00E-05 | 0.00038 |
| <b>Tnik</b>          | 1.46862 | 5.00E-05 | 0.00032 | 1.45793 | 0.0062   | 0.02306 |
| <b>Lgals3</b>        | 1.46815 | 5.00E-05 | 0.00032 | 3.65401 | 5.00E-05 | 0.00038 |
| <b>Tmc6</b>          | 1.46638 | 0.0013   | 0.00554 | 2.04774 | 0.00055  | 0.00312 |
| <b>Zim1</b>          | 1.46636 | 0.00125  | 0.00536 | 1.85755 | 2.00E-04 | 0.00131 |
| <b>Phf3</b>          | 1.46588 | 5.00E-05 | 0.00032 | 1.73242 | 5.00E-05 | 0.00038 |
| <b>Sema5a</b>        | 1.46483 | 5.00E-05 | 0.00032 | 0.80301 | 0.0137   | 0.04392 |
| <b>BC029214</b>      | 1.46291 | 5.00E-05 | 0.00032 | 1.70224 | 0.00015  | 0.00102 |
| <b>Pde2a</b>         | 1.46147 | 5.00E-05 | 0.00032 | 1.25392 | 0.00015  | 0.00102 |
| <b>Hba-a1</b>        | 1.46039 | 5.00E-05 | 0.00032 | 2.5021  | 5.00E-05 | 0.00038 |
| <b>Atf6b</b>         | 1.46005 | 5.00E-05 | 0.00032 | 1.10626 | 0.00475  | 0.0186  |
| <b>4933421E11Rik</b> | 1.45923 | 5.00E-05 | 0.00032 | 1.27603 | 0.00015  | 0.00102 |
| <b>Flywch1</b>       | 1.45916 | 5.00E-05 | 0.00032 | 0.97819 | 0.0026   | 0.01132 |
| <b>Xab2</b>          | 1.45855 | 5.00E-05 | 0.00032 | 1.39607 | 5.00E-05 | 0.00038 |
| <b>Nbr1</b>          | 1.45657 | 2.00E-04 | 0.00111 | 1.9174  | 5.00E-05 | 0.00038 |
| <b>Abhd6</b>         | 1.45519 | 5.00E-05 | 0.00032 | 1.61868 | 5.00E-05 | 0.00038 |
| <b>Kctd20</b>        | 1.45502 | 5.00E-05 | 0.00032 | 1.16951 | 0.00025  | 0.00159 |
| <b>Actr8</b>         | 1.45485 | 5.00E-05 | 0.00032 | 1.67259 | 5.00E-05 | 0.00038 |
| <b>E130102H24Rik</b> | 1.45478 | 1.00E-04 | 0.0006  | 1.95682 | 5.00E-05 | 0.00038 |
| <b>Zbtb2</b>         | 1.45403 | 5.00E-05 | 0.00032 | 1.3845  | 5.00E-05 | 0.00038 |
| <b>Tubb4b</b>        | 1.45172 | 5.00E-05 | 0.00032 | 1.64719 | 5.00E-05 | 0.00038 |
| <b>Gsto1</b>         | 1.45115 | 5.00E-05 | 0.00032 | 1.72329 | 5.00E-05 | 0.00038 |
| <b>Mospd2</b>        | 1.44987 | 5.00E-05 | 0.00032 | 1.07419 | 0.0012   | 0.006   |
| <b>Slc25a44</b>      | 1.44966 | 5.00E-05 | 0.00032 | 1.40405 | 5.00E-05 | 0.00038 |
| <b>Zrsr2</b>         | 1.44813 | 0.00075  | 0.00349 | 1.61159 | 3.00E-04 | 0.00184 |
| <b>Syf2</b>          | 1.44799 | 5.00E-05 | 0.00032 | 1.92907 | 5.00E-05 | 0.00038 |

|                      |         |          |         |         |          |         |
|----------------------|---------|----------|---------|---------|----------|---------|
| <b>Socs2</b>         | 1.44617 | 5.00E-05 | 0.00032 | 1.30247 | 3.00E-04 | 0.00184 |
| <b>Jmjd1c</b>        | 1.44593 | 5.00E-05 | 0.00032 | 1.64207 | 0.00025  | 0.00159 |
| <b>Micall1</b>       | 1.44579 | 5.00E-05 | 0.00032 | 1.6858  | 5.00E-05 | 0.00038 |
| <b>Mfap1b</b>        | 1.44443 | 5.00E-05 | 0.00032 | 1.56138 | 1.00E-04 | 0.00072 |
| <b>Nol8</b>          | 1.44383 | 5.00E-05 | 0.00032 | 1.41691 | 5.00E-05 | 0.00038 |
| <b>Pvr</b>           | 1.44356 | 5.00E-04 | 0.00244 | 1.04777 | 0.009    | 0.03133 |
| <b>1700019E19Rik</b> | 1.44295 | 5.00E-05 | 0.00032 | 0.96267 | 0.0053   | 0.02027 |
| <b>Arid3a</b>        | 1.44268 | 5.00E-05 | 0.00032 | 1.95821 | 5.00E-05 | 0.00038 |
| <b>Plekhm1</b>       | 1.44205 | 5.00E-05 | 0.00032 | 1.23074 | 0.00015  | 0.00102 |
| <b>Lin54</b>         | 1.44075 | 5.00E-05 | 0.00032 | 1.6983  | 5.00E-05 | 0.00038 |
| <b>Ythdc1</b>        | 1.44021 | 5.00E-05 | 0.00032 | 1.55392 | 5.00E-05 | 0.00038 |
| <b>Glul</b>          | 1.4402  | 1.00E-04 | 0.0006  | 3.91121 | 5.00E-05 | 0.00038 |
| <b>Gramd4</b>        | 1.43917 | 5.00E-05 | 0.00032 | 2.64286 | 5.00E-05 | 0.00038 |
| <b>Furin</b>         | 1.43674 | 5.00E-05 | 0.00032 | 1.43584 | 5.00E-05 | 0.00038 |
| <b>Hlx</b>           | 1.43557 | 5.00E-05 | 0.00032 | 1.36825 | 5.00E-05 | 0.00038 |
| <b>Sf3b1</b>         | 1.43417 | 5.00E-05 | 0.00032 | 2.17191 | 5.00E-05 | 0.00038 |
| <b>Phc2</b>          | 1.43221 | 5.00E-05 | 0.00032 | 1.65323 | 5.00E-05 | 0.00038 |
| <b>Jmy</b>           | 1.43087 | 5.00E-05 | 0.00032 | 2.14685 | 5.00E-05 | 0.00038 |
| <b>Klf11</b>         | 1.43028 | 5.00E-05 | 0.00032 | 1.45028 | 5.00E-05 | 0.00038 |
| <b>Mtmr4</b>         | 1.42923 | 5.00E-05 | 0.00032 | 1.3201  | 5.00E-05 | 0.00038 |
| <b>Ngly1</b>         | 1.42591 | 5.00E-05 | 0.00032 | 0.90198 | 0.0087   | 0.03046 |
| <b>Zkscan1</b>       | 1.42582 | 5.00E-05 | 0.00032 | 0.91544 | 0.0049   | 0.01905 |
| <b>Fbxo6</b>         | 1.4209  | 5.00E-05 | 0.00032 | 1.43897 | 5.00E-05 | 0.00038 |
| <b>Eapp</b>          | 1.41872 | 5.00E-05 | 0.00032 | 1.70593 | 5.00E-05 | 0.00038 |
| <b>Polr3e</b>        | 1.41848 | 5.00E-05 | 0.00032 | 0.77941 | 0.01305  | 0.04216 |
| <b>Rin3</b>          | 1.41406 | 5.00E-05 | 0.00032 | 1.98821 | 5.00E-05 | 0.00038 |
| <b>Qtrt1</b>         | 1.414   | 5.00E-05 | 0.00032 | 1.61705 | 5.00E-05 | 0.00038 |
| <b>Dhx40</b>         | 1.41394 | 5.00E-05 | 0.00032 | 2.23178 | 5.00E-05 | 0.00038 |
| <b>Bclaf1</b>        | 1.41324 | 5.00E-05 | 0.00032 | 1.31027 | 5.00E-05 | 0.00038 |
| <b>Mospd1</b>        | 1.41213 | 5.00E-05 | 0.00032 | 1.44687 | 5.00E-05 | 0.00038 |
| <b>Dnajb9</b>        | 1.41146 | 5.00E-05 | 0.00032 | 1.76882 | 5.00E-05 | 0.00038 |
| <b>Ddx24</b>         | 1.4094  | 5.00E-05 | 0.00032 | 1.59104 | 5.00E-05 | 0.00038 |
| <b>Ptpn2</b>         | 1.40833 | 5.00E-05 | 0.00032 | 1.59597 | 5.00E-05 | 0.00038 |
| <b>Zscan12</b>       | 1.40778 | 5.00E-05 | 0.00032 | 1.52112 | 5.00E-05 | 0.00038 |
| <b>Dym</b>           | 1.40753 | 5.00E-05 | 0.00032 | 1.14188 | 0.00095  | 0.00492 |
| <b>Tmem189</b>       | 1.40744 | 0.00065  | 0.00308 | 1.48244 | 0.01535  | 0.04782 |
| <b>Zc3h4</b>         | 1.40422 | 5.00E-05 | 0.00032 | 1.40677 | 5.00E-05 | 0.00038 |
| <b>Rnf216</b>        | 1.40342 | 5.00E-05 | 0.00032 | 1.65401 | 5.00E-05 | 0.00038 |
| <b>Hbb-b1</b>        | 1.40289 | 5.00E-05 | 0.00032 | 2.38693 | 5.00E-05 | 0.00038 |
| <b>Eif3j</b>         | 1.40282 | 5.00E-05 | 0.00032 | 0.97629 | 0.0125   | 0.04075 |
| <b>Tgm2</b>          | 1.40252 | 1.00E-04 | 0.0006  | 1.93591 | 5.00E-05 | 0.00038 |

|                      |         |          |         |         |          |         |
|----------------------|---------|----------|---------|---------|----------|---------|
| <b>Papd7</b>         | 1.40249 | 0.00885  | 0.02757 | 1.93858 | 0.00455  | 0.01797 |
| <b>Npm1</b>          | 1.40163 | 5.00E-05 | 0.00032 | 1.61186 | 5.00E-05 | 0.00038 |
| <b>Pmm1</b>          | 1.40079 | 5.00E-05 | 0.00032 | 3.39681 | 5.00E-05 | 0.00038 |
| <b>1110007C09Rik</b> | 1.40033 | 5.00E-05 | 0.00032 | 1.63471 | 5.00E-05 | 0.00038 |
| <b>Rnf4</b>          | 1.39886 | 5.00E-05 | 0.00032 | 1.15272 | 3.00E-04 | 0.00184 |
| <b>Bod1l</b>         | 1.39752 | 5.00E-05 | 0.00032 | 1.34877 | 5.00E-05 | 0.00038 |
| <b>Ucp2</b>          | 1.39722 | 4.00E-04 | 0.00203 | 2.07245 | 5.00E-05 | 0.00038 |
| <b>Plagl1</b>        | 1.39504 | 0.012    | 0.0353  | 2.69033 | 5.00E-05 | 0.00038 |
| <b>Zfp280d</b>       | 1.39413 | 5.00E-05 | 0.00032 | 1.85145 | 5.00E-05 | 0.00038 |
| <b>Grpel1</b>        | 1.39327 | 5.00E-05 | 0.00032 | 1.54318 | 5.00E-05 | 0.00038 |
| <b>Nop58</b>         | 1.39261 | 5.00E-05 | 0.00032 | 0.91165 | 0.00405  | 0.01634 |
| <b>Gak</b>           | 1.39204 | 5.00E-05 | 0.00032 | 1.4328  | 1.00E-04 | 0.00072 |
| <b>Cstf1</b>         | 1.38935 | 5.00E-05 | 0.00032 | 1.30801 | 0.00655  | 0.02414 |
| <b>Hs6st1</b>        | 1.38853 | 5.00E-05 | 0.00032 | 1.09669 | 9.00E-04 | 0.0047  |
| <b>Acadl</b>         | 1.38732 | 5.00E-05 | 0.00032 | 1.18429 | 0.0022   | 0.00992 |
| <b>Cltb</b>          | 1.38678 | 5.00E-05 | 0.00032 | 1.08703 | 0.00315  | 0.01327 |
| <b>Wapal</b>         | 1.38549 | 0.00335  | 0.01227 | 1.36291 | 0.0068   | 0.0249  |
| <b>Tbc1d20</b>       | 1.38455 | 5.00E-05 | 0.00032 | 1.5868  | 5.00E-05 | 0.00038 |
| <b>Atp6v0e</b>       | 1.38299 | 5.00E-05 | 0.00032 | 1.9252  | 5.00E-05 | 0.00038 |
| <b>Prkch</b>         | 1.38278 | 5.00E-05 | 0.00032 | 1.03431 | 0.00065  | 0.00359 |
| <b>Igf1r</b>         | 1.38182 | 5.00E-05 | 0.00032 | 2.66818 | 5.00E-05 | 0.00038 |
| <b>Cir1</b>          | 1.38175 | 0.00335  | 0.01227 | 1.91073 | 0.0107   | 0.03596 |
| <b>Mgea5</b>         | 1.38084 | 5.00E-05 | 0.00032 | 1.56447 | 5.00E-05 | 0.00038 |
| <b>Mcp1</b>          | 1.38006 | 0.00015  | 0.00086 | 1.13893 | 0.00335  | 0.01398 |
| <b>1110034G24Rik</b> | 1.37901 | 2.00E-04 | 0.00111 | 1.45214 | 0.00045  | 0.00262 |
| <b>Farp1</b>         | 1.37887 | 0.00815  | 0.02577 | 1.21723 | 0.00815  | 0.0289  |
| <b>Tbc1d17</b>       | 1.37823 | 0.0032   | 0.01181 | 1.99618 | 0.00235  | 0.01046 |
| <b>Cyp4b1</b>        | 1.37691 | 5.00E-05 | 0.00032 | 2.29082 | 5.00E-05 | 0.00038 |
| <b>Kcmf1</b>         | 1.37638 | 5.00E-05 | 0.00032 | 1.1591  | 0.00245  | 0.01083 |
| <b>Etv3</b>          | 1.37607 | 5.00E-05 | 0.00032 | 1.34421 | 5.00E-05 | 0.00038 |
| <b>Scaf11</b>        | 1.37591 | 5.00E-05 | 0.00032 | 1.95713 | 5.00E-05 | 0.00038 |
| <b>Ranbp10</b>       | 1.37511 | 5.00E-05 | 0.00032 | 1.69422 | 5.00E-05 | 0.00038 |
| <b>Usp13</b>         | 1.3745  | 5.00E-05 | 0.00032 | 1.43506 | 0.0062   | 0.02306 |
| <b>Eif3b</b>         | 1.37368 | 5.00E-05 | 0.00032 | 1.20169 | 0.00055  | 0.00312 |
| <b>Ppp1r18</b>       | 1.37345 | 5.00E-05 | 0.00032 | 1.38156 | 1.00E-04 | 0.00072 |
| <b>Aebp2</b>         | 1.37239 | 5.00E-05 | 0.00032 | 1.3314  | 5.00E-05 | 0.00038 |
| <b>Trnt1</b>         | 1.37218 | 6.00E-04 | 0.00286 | 1.8031  | 0.00045  | 0.00262 |
| <b>Wipi2</b>         | 1.37177 | 5.00E-05 | 0.00032 | 1.13915 | 0.0013   | 0.00641 |
| <b>Lamp2</b>         | 1.36993 | 5.00E-05 | 0.00032 | 1.23695 | 6.00E-04 | 0.00335 |
| <b>Serinc3</b>       | 1.3699  | 5.00E-05 | 0.00032 | 1.57151 | 3.00E-04 | 0.00184 |
| <b>Rapgef1</b>       | 1.36831 | 5.00E-05 | 0.00032 | 1.5356  | 0.00015  | 0.00102 |

|                      |         |          |         |         |          |         |
|----------------------|---------|----------|---------|---------|----------|---------|
| <b>Ftsj3</b>         | 1.36815 | 5.00E-05 | 0.00032 | 1.03971 | 0.0024   | 0.01064 |
| <b>Qsox1</b>         | 1.36774 | 5.00E-05 | 0.00032 | 1.61686 | 5.00E-05 | 0.00038 |
| <b>4833403I15Rik</b> | 1.36702 | 7.00E-04 | 0.00328 | 1.78905 | 5.00E-04 | 0.00287 |
| <b>Smndc1</b>        | 1.3669  | 5.00E-05 | 0.00032 | 1.48706 | 5.00E-05 | 0.00038 |
| <b>Akap8l</b>        | 1.36486 | 5.00E-05 | 0.00032 | 1.44346 | 5.00E-05 | 0.00038 |
| <b>Lemd2</b>         | 1.36468 | 5.00E-05 | 0.00032 | 1.63514 | 5.00E-05 | 0.00038 |
| <b>Txn1</b>          | 1.36449 | 5.00E-05 | 0.00032 | 0.80431 | 0.01015  | 0.03445 |
| <b>Nuak1</b>         | 1.36425 | 0.0029   | 0.0109  | 1.61496 | 5.00E-05 | 0.00038 |
| <b>Ap1m1</b>         | 1.36372 | 5.00E-05 | 0.00032 | 0.97744 | 0.0025   | 0.011   |
| <b>Rbm4b</b>         | 1.36326 | 1.00E-04 | 0.0006  | 2.19091 | 5.00E-05 | 0.00038 |
| <b>Zfp52</b>         | 1.36221 | 5.00E-05 | 0.00032 | 3.09029 | 5.00E-05 | 0.00038 |
| <b>Stk24</b>         | 1.36157 | 5.00E-05 | 0.00032 | 1.56719 | 5.00E-05 | 0.00038 |
| <b>Ogdhl</b>         | 1.36124 | 1.00E-04 | 0.0006  | 1.23989 | 0.0032   | 0.01343 |
| <b>Atf1</b>          | 1.36053 | 5.00E-05 | 0.00032 | 1.07307 | 0.0014   | 0.00681 |
| <b>Ptplad1</b>       | 1.35972 | 5.00E-05 | 0.00032 | 1.48515 | 5.00E-05 | 0.00038 |
| <b>Zfp784</b>        | 1.3571  | 5.00E-05 | 0.00032 | 1.23074 | 3.00E-04 | 0.00184 |
| <b>4933421O10Rik</b> | 1.35655 | 1.00E-04 | 0.0006  | 1.14275 | 0.0018   | 0.00842 |
| <b>Kdm4a</b>         | 1.35334 | 5.00E-05 | 0.00032 | 1.59285 | 5.00E-05 | 0.00038 |
| <b>Ppm1d</b>         | 1.35324 | 5.00E-05 | 0.00032 | 1.55807 | 5.00E-05 | 0.00038 |
| <b>Rusc1</b>         | 1.35144 | 5.00E-05 | 0.00032 | 0.82406 | 0.0098   | 0.03356 |
| <b>Aatf</b>          | 1.35131 | 5.00E-05 | 0.00032 | 2.02498 | 5.00E-05 | 0.00038 |
| <b>Gps2</b>          | 1.35125 | 5.00E-05 | 0.00032 | 1.63412 | 5.00E-05 | 0.00038 |
| <b>Eif1</b>          | 1.35008 | 5.00E-05 | 0.00032 | 1.70157 | 0.00345  | 0.01434 |
| <b>Insr</b>          | 1.34963 | 5.00E-05 | 0.00032 | 1.24513 | 0.00015  | 0.00102 |
| <b>Cct2</b>          | 1.34635 | 5.00E-05 | 0.00032 | 1.27725 | 2.00E-04 | 0.00131 |
| <b>Phf13</b>         | 1.34485 | 5.00E-05 | 0.00032 | 1.58197 | 5.00E-05 | 0.00038 |
| <b>Kdm3a</b>         | 1.34353 | 5.00E-05 | 0.00032 | 1.38845 | 5.00E-05 | 0.00038 |
| <b>Osbpl11</b>       | 1.34333 | 5.00E-05 | 0.00032 | 1.40031 | 5.00E-05 | 0.00038 |
| <b>Acox1</b>         | 1.34269 | 5.00E-05 | 0.00032 | 1.09468 | 0.0028   | 0.01205 |
| <b>Dnajib12</b>      | 1.34238 | 5.00E-05 | 0.00032 | 1.04591 | 0.00105  | 0.00534 |
| <b>Ptcd1</b>         | 1.34144 | 5.00E-05 | 0.00032 | 1.36577 | 0.00075  | 0.00405 |
| <b>Ssu72</b>         | 1.34039 | 5.00E-05 | 0.00032 | 1.52149 | 5.00E-05 | 0.00038 |
| <b>2310021P13Rik</b> | 1.33953 | 5.00E-05 | 0.00032 | 1.32676 | 5.00E-05 | 0.00038 |
| <b>Stab2</b>         | 1.33847 | 5.00E-05 | 0.00032 | 1.56896 | 4.00E-04 | 0.00237 |
| <b>E130218I03Rik</b> | 1.33745 | 0.00295  | 0.01104 | 1.75668 | 4.00E-04 | 0.00237 |
| <b>Jak3</b>          | 1.33635 | 5.00E-05 | 0.00032 | 0.88844 | 0.00675  | 0.02474 |
| <b>Ap3d1</b>         | 1.33596 | 5.00E-05 | 0.00032 | 1.43953 | 5.00E-05 | 0.00038 |
| <b>4933407H18Rik</b> | 1.33554 | 5.00E-05 | 0.00032 | 0.96968 | 0.00295  | 0.01259 |
| <b>Fxr2</b>          | 1.33448 | 1.00E-04 | 0.0006  | 1.41249 | 1.00E-04 | 0.00072 |
| <b>Pim1</b>          | 1.33347 | 5.00E-05 | 0.00032 | 3.9879  | 5.00E-05 | 0.00038 |
| <b>Tmem52</b>        | 1.33285 | 5.00E-05 | 0.00032 | 1.13075 | 0.0034   | 0.01416 |

|                 |         |          |         |         |          |         |
|-----------------|---------|----------|---------|---------|----------|---------|
| <b>Ndor1</b>    | 1.33198 | 0.0096   | 0.02947 | 1.53648 | 0.00125  | 0.00621 |
| <b>Trmt61a</b>  | 1.33176 | 5.00E-05 | 0.00032 | 1.32919 | 0.00075  | 0.00405 |
| <b>Psmc7</b>    | 1.33154 | 5.00E-05 | 0.00032 | 1.49684 | 1.00E-04 | 0.00072 |
| <b>Hba-a2</b>   | 1.33089 | 5.00E-05 | 0.00032 | 2.36269 | 5.00E-05 | 0.00038 |
| <b>Pdpc1</b>    | 1.33023 | 5.00E-05 | 0.00032 | 1.1881  | 5.00E-05 | 0.00038 |
| <b>Wipi1</b>    | 1.3302  | 5.00E-05 | 0.00032 | 1.76874 | 5.00E-05 | 0.00038 |
| <b>Mtor</b>     | 1.33005 | 0.0065   | 0.02141 | 2.01303 | 0.00215  | 0.00974 |
| <b>Utp3</b>     | 1.32955 | 5.00E-05 | 0.00032 | 1.68975 | 5.00E-05 | 0.00038 |
| <b>Rnf114</b>   | 1.32845 | 5.00E-05 | 0.00032 | 1.51273 | 3.00E-04 | 0.00184 |
| <b>Zfand3</b>   | 1.32782 | 5.00E-05 | 0.00032 | 1.37952 | 0.00085  | 0.00449 |
| <b>Cblb</b>     | 1.32563 | 5.00E-05 | 0.00032 | 1.50886 | 5.00E-05 | 0.00038 |
| <b>Ninj1</b>    | 1.32524 | 5.00E-05 | 0.00032 | 2.49926 | 5.00E-05 | 0.00038 |
| <b>Spata511</b> | 1.32413 | 5.00E-05 | 0.00032 | 1.62586 | 5.00E-05 | 0.00038 |
| <b>Rab9</b>     | 1.32337 | 5.00E-05 | 0.00032 | 1.84176 | 5.00E-05 | 0.00038 |
| <b>Sp1</b>      | 1.32306 | 4.00E-04 | 0.00203 | 0.90526 | 0.0046   | 0.01814 |
| <b>Dnal4</b>    | 1.32288 | 5.00E-05 | 0.00032 | 1.11792 | 0.00275  | 0.01187 |
| <b>Dhx15</b>    | 1.32251 | 5.00E-05 | 0.00032 | 1.55043 | 5.00E-05 | 0.00038 |
| <b>Ccb12</b>    | 1.32248 | 5.00E-05 | 0.00032 | 1.94284 | 5.00E-05 | 0.00038 |
| <b>Cstb</b>     | 1.32217 | 1.00E-04 | 0.0006  | 1.88256 | 5.00E-05 | 0.00038 |
| <b>Eif3g</b>    | 1.32164 | 5.00E-05 | 0.00032 | 1.69861 | 5.00E-05 | 0.00038 |
| <b>Ncl</b>      | 1.32122 | 5.00E-05 | 0.00032 | 1.42084 | 1.00E-04 | 0.00072 |
| <b>Ugcg</b>     | 1.32049 | 5.00E-05 | 0.00032 | 1.47129 | 5.00E-05 | 0.00038 |
| <b>Eif4g3</b>   | 1.32004 | 5.00E-05 | 0.00032 | 0.82361 | 0.01495  | 0.04683 |
| <b>Uggt1</b>    | 1.31967 | 5.00E-05 | 0.00032 | 1.51502 | 5.00E-05 | 0.00038 |
| <b>Zfp275</b>   | 1.31954 | 5.00E-05 | 0.00032 | 1.11776 | 0.0022   | 0.00992 |
| <b>Bcl2l11</b>  | 1.31909 | 5.00E-05 | 0.00032 | 1.95911 | 5.00E-05 | 0.00038 |
| <b>Slc25a5</b>  | 1.31814 | 5.00E-05 | 0.00032 | 0.82779 | 0.00675  | 0.02474 |
| <b>Trim62</b>   | 1.31805 | 0.00235  | 0.00914 | 1.30745 | 0.0035   | 0.01447 |
| <b>Zfp384</b>   | 1.31588 | 5.00E-05 | 0.00032 | 1.33401 | 1.00E-04 | 0.00072 |
| <b>S1pr1</b>    | 1.31484 | 5.00E-05 | 0.00032 | 1.07567 | 0.00055  | 0.00312 |
| <b>Pes1</b>     | 1.3132  | 0.00025  | 0.00135 | 1.28035 | 0.00145  | 0.00702 |
| <b>Tom1</b>     | 1.31251 | 5.00E-05 | 0.00032 | 1.77291 | 5.00E-05 | 0.00038 |
| <b>Tbk1</b>     | 1.30927 | 5.00E-05 | 0.00032 | 1.12671 | 0.00025  | 0.00159 |
| <b>Ccn12</b>    | 1.30891 | 5.00E-05 | 0.00032 | 1.36515 | 5.00E-05 | 0.00038 |
| <b>Lzts2</b>    | 1.30744 | 5.00E-05 | 0.00032 | 1.65877 | 5.00E-05 | 0.00038 |
| <b>Dnajc2</b>   | 1.30655 | 5.00E-05 | 0.00032 | 1.11737 | 4.00E-04 | 0.00237 |
| <b>Rc3h1</b>    | 1.30638 | 5.00E-05 | 0.00032 | 0.77716 | 0.0108   | 0.0362  |
| <b>Myc</b>      | 1.30588 | 2.00E-04 | 0.00111 | 2.17064 | 5.00E-05 | 0.00038 |
| <b>Mtmt14</b>   | 1.30529 | 5.00E-05 | 0.00032 | 2.45169 | 5.00E-05 | 0.00038 |
| <b>Tjap1</b>    | 1.30488 | 5.00E-05 | 0.00032 | 1.80741 | 5.00E-05 | 0.00038 |
| <b>C80913</b>   | 1.30481 | 5.00E-05 | 0.00032 | 0.95413 | 0.00255  | 0.01114 |



|                      |         |          |         |         |          |         |
|----------------------|---------|----------|---------|---------|----------|---------|
| <b>Irak2</b>         | 1.30435 | 5.00E-05 | 0.00032 | 1.18015 | 4.00E-04 | 0.00237 |
| <b>Zranb2</b>        | 1.30418 | 5.00E-05 | 0.00032 | 1.04187 | 0.00355  | 0.01466 |
| <b>Asx11</b>         | 1.30386 | 0.004    | 0.01419 | 1.7088  | 5.00E-05 | 0.00038 |
| <b>Sox9</b>          | 1.30363 | 0.00195  | 0.00782 | 1.14766 | 0.00875  | 0.03061 |
| <b>Dctn4</b>         | 1.30264 | 5.00E-05 | 0.00032 | 1.00999 | 0.0019   | 0.0088  |
| <b>Phrf1</b>         | 1.30244 | 0.0011   | 0.00481 | 1.27837 | 0.0112   | 0.0373  |
| <b>Plbd2</b>         | 1.30235 | 5.00E-05 | 0.00032 | 1.77145 | 5.00E-05 | 0.00038 |
| <b>Hsf4</b>          | 1.30108 | 5.00E-05 | 0.00032 | 1.84601 | 5.00E-05 | 0.00038 |
| <b>Zfp511</b>        | 1.30032 | 5.00E-05 | 0.00032 | 1.04629 | 0.00245  | 0.01083 |
| <b>Pold4</b>         | 1.29979 | 5.00E-05 | 0.00032 | 1.31001 | 5.00E-05 | 0.00038 |
| <b>Srp68</b>         | 1.29864 | 5.00E-05 | 0.00032 | 1.33464 | 5.00E-05 | 0.00038 |
| <b>Rhob</b>          | 1.29815 | 5.00E-05 | 0.00032 | 1.23572 | 0.00015  | 0.00102 |
| <b>Ccn11</b>         | 1.29814 | 5.00E-05 | 0.00032 | 1.66652 | 5.00E-05 | 0.00038 |
| <b>Tekt1</b>         | 1.29594 | 0.0015   | 0.00627 | 1.47333 | 0.00095  | 0.00492 |
| <b>Spock2</b>        | 1.29537 | 5.00E-05 | 0.00032 | 2.92931 | 5.00E-05 | 0.00038 |
| <b>Bcdin3d</b>       | 1.29451 | 0.00035  | 0.00181 | 0.92259 | 0.0106   | 0.03569 |
| <b>Rab27a</b>        | 1.29432 | 0.0043   | 0.01513 | 2.33682 | 5.00E-05 | 0.00038 |
| <b>Cirh1a</b>        | 1.29392 | 5.00E-05 | 0.00032 | 1.15673 | 0.00015  | 0.00102 |
| <b>Kin</b>           | 1.2937  | 0.00335  | 0.01227 | 1.26449 | 0.0048   | 0.01873 |
| <b>Sugp1</b>         | 1.29358 | 5.00E-05 | 0.00032 | 1.29897 | 5.00E-05 | 0.00038 |
| <b>Dusp26</b>        | 1.29207 | 5.00E-05 | 0.00032 | 1.4243  | 0.00025  | 0.00159 |
| <b>Tcea2</b>         | 1.29184 | 0.0083   | 0.02615 | 1.43528 | 0.0045   | 0.01782 |
| <b>Zbtb43</b>        | 1.29165 | 9.00E-04 | 0.00406 | 1.28156 | 3.00E-04 | 0.00184 |
| <b>Cpne8</b>         | 1.29111 | 5.00E-04 | 0.00244 | 1.40904 | 1.00E-04 | 0.00072 |
| <b>1500003O03Rik</b> | 1.28842 | 5.00E-05 | 0.00032 | 1.11464 | 0.00065  | 0.00359 |
| <b>Aldh9a1</b>       | 1.28713 | 5.00E-05 | 0.00032 | 2.26451 | 5.00E-05 | 0.00038 |
| <b>Anks3</b>         | 1.28696 | 5.00E-05 | 0.00032 | 1.01621 | 9.00E-04 | 0.0047  |
| <b>Rbm6</b>          | 1.28546 | 5.00E-05 | 0.00032 | 1.35947 | 1.00E-04 | 0.00072 |
| <b>Rps27</b>         | 1.28437 | 5.00E-05 | 0.00032 | 1.7595  | 5.00E-05 | 0.00038 |
| <b>Dda1</b>          | 1.28372 | 1.00E-04 | 0.0006  | 1.46966 | 8.00E-04 | 0.00427 |
| <b>Ing5</b>          | 1.28283 | 5.00E-05 | 0.00032 | 1.59331 | 5.00E-05 | 0.00038 |
| <b>Gm15298</b>       | 1.281   | 0.003    | 0.01117 | 1.34517 | 0.003    | 0.01275 |
| <b>Ddx49</b>         | 1.27948 | 0.00835  | 0.02627 | 1.44745 | 0.01145  | 0.03798 |
| <b>Lrrc8c</b>        | 1.27857 | 5.00E-05 | 0.00032 | 1.34309 | 5.00E-05 | 0.00038 |
| <b>Scaf8</b>         | 1.27736 | 5.00E-05 | 0.00032 | 1.60684 | 5.00E-05 | 0.00038 |
| <b>Alg1</b>          | 1.27624 | 0.0024   | 0.00929 | 1.56718 | 0.00185  | 0.00861 |
| <b>Pa2g4</b>         | 1.27479 | 5.00E-05 | 0.00032 | 1.08282 | 0.00115  | 0.00578 |
| <b>Eprs</b>          | 1.27225 | 5.00E-05 | 0.00032 | 1.50616 | 4.00E-04 | 0.00237 |
| <b>Nfkbil1</b>       | 1.27156 | 1.00E-04 | 0.0006  | 1.56933 | 5.00E-05 | 0.00038 |
| <b>Akirin1</b>       | 1.27057 | 5.00E-05 | 0.00032 | 0.78149 | 0.01445  | 0.04566 |
| <b>Tet2</b>          | 1.26874 | 5.00E-05 | 0.00032 | 0.93957 | 0.00255  | 0.01114 |

|                      |         |          |         |         |          |         |
|----------------------|---------|----------|---------|---------|----------|---------|
| <b>1810008A18Rik</b> | 1.26827 | 5.00E-05 | 0.00032 | 1.29824 | 0.00015  | 0.00102 |
| <b>Brms1</b>         | 1.26603 | 5.00E-05 | 0.00032 | 1.48791 | 5.00E-05 | 0.00038 |
| <b>Ppil4</b>         | 1.2653  | 5.00E-05 | 0.00032 | 1.32871 | 5.00E-05 | 0.00038 |
| <b>Dscr3</b>         | 1.26193 | 0.00025  | 0.00135 | 1.4634  | 5.00E-05 | 0.00038 |
| <b>Agpat3</b>        | 1.26183 | 5.00E-05 | 0.00032 | 1.20687 | 0.0048   | 0.01873 |
| <b>Gtf2ird2</b>      | 1.26061 | 0.00065  | 0.00308 | 1.05408 | 0.01235  | 0.04033 |
| <b>Naga</b>          | 1.25987 | 5.00E-05 | 0.00032 | 1.59113 | 5.00E-05 | 0.00038 |
| <b>Acsl6</b>         | 1.25961 | 5.00E-04 | 0.00244 | 1.97995 | 0.00195  | 0.00898 |
| <b>Gigyf2</b>        | 1.25839 | 5.00E-05 | 0.00032 | 0.97843 | 0.00415  | 0.01665 |
| <b>Sox17</b>         | 1.25739 | 5.00E-05 | 0.00032 | 1.30372 | 5.00E-05 | 0.00038 |
| <b>Ssh3</b>          | 1.25571 | 5.00E-05 | 0.00032 | 1.5491  | 5.00E-05 | 0.00038 |
| <b>Apod</b>          | 1.25516 | 5.00E-05 | 0.00032 | 1.90092 | 5.00E-05 | 0.00038 |
| <b>Sf1</b>           | 1.25262 | 0.00015  | 0.00086 | 2.18212 | 5.00E-05 | 0.00038 |
| <b>Btg1</b>          | 1.25193 | 5.00E-05 | 0.00032 | 1.91447 | 5.00E-05 | 0.00038 |
| <b>Paip2b</b>        | 1.25185 | 5.00E-05 | 0.00032 | 1.75808 | 5.00E-05 | 0.00038 |
| <b>Supt6h</b>        | 1.25168 | 5.00E-05 | 0.00032 | 1.52626 | 0.00035  | 0.00212 |
| <b>Ddt</b>           | 1.25136 | 5.00E-05 | 0.00032 | 2.09428 | 5.00E-05 | 0.00038 |
| <b>Cpsf1</b>         | 1.24847 | 5.00E-05 | 0.00032 | 1.07812 | 0.00095  | 0.00492 |
| <b>Sp4</b>           | 1.24778 | 5.00E-05 | 0.00032 | 2.15662 | 5.00E-05 | 0.00038 |
| <b>A430110L20Rik</b> | 1.24709 | 0.00855  | 0.02678 | 1.399   | 0.00295  | 0.01259 |
| <b>Gm17254</b>       | 1.24628 | 0.00475  | 0.01645 | 1.30113 | 0.00465  | 0.01831 |
| <b>Otud5</b>         | 1.24395 | 8.00E-04 | 0.00368 | 1.18854 | 0.0076   | 0.02728 |
| <b>Arpp21</b>        | 1.24314 | 4.00E-04 | 0.00203 | 1.25053 | 0.0025   | 0.011   |
| <b>N4bp3</b>         | 1.24289 | 0.00085  | 0.00387 | 1.28928 | 8.00E-04 | 0.00427 |
| <b>Papd4</b>         | 1.24227 | 5.00E-05 | 0.00032 | 1.52669 | 5.00E-05 | 0.00038 |
| <b>Dmwd</b>          | 1.24215 | 5.00E-05 | 0.00032 | 1.52438 | 5.00E-05 | 0.00038 |
| <b>Gpi1</b>          | 1.24161 | 5.00E-05 | 0.00032 | 1.57007 | 0.0036   | 0.01484 |
| <b>Atg7</b>          | 1.23845 | 5.00E-05 | 0.00032 | 1.23246 | 0.00015  | 0.00102 |
| <b>Gm10397</b>       | 1.23844 | 0.01785  | 0.04872 | 2.48222 | 0.0014   | 0.00681 |
| <b>Leng1</b>         | 1.23844 | 7.00E-04 | 0.00328 | 1.43537 | 0.0016   | 0.00763 |
| <b>Uck2</b>          | 1.23797 | 5.00E-05 | 0.00032 | 1.5158  | 5.00E-05 | 0.00038 |
| <b>Dhx37</b>         | 1.2377  | 5.00E-05 | 0.00032 | 1.82129 | 5.00E-05 | 0.00038 |
| <b>Gab2</b>          | 1.23383 | 5.00E-05 | 0.00032 | 3.06508 | 5.00E-05 | 0.00038 |
| <b>Gfer</b>          | 1.23365 | 5.00E-05 | 0.00032 | 1.2557  | 5.00E-05 | 0.00038 |
| <b>Actr5</b>         | 1.23316 | 0.0079   | 0.02512 | 1.6483  | 6.00E-04 | 0.00335 |
| <b>Eif2ak4</b>       | 1.23285 | 0.00635  | 0.02101 | 2.9261  | 5.00E-05 | 0.00038 |
| <b>Cxcr7</b>         | 1.22924 | 5.00E-05 | 0.00032 | 0.77065 | 0.0136   | 0.04367 |
| <b>Ppard</b>         | 1.22843 | 5.00E-05 | 0.00032 | 0.98197 | 0.00135  | 0.00662 |
| <b>Pik3ip1</b>       | 1.22695 | 5.00E-05 | 0.00032 | 1.6078  | 5.00E-05 | 0.00038 |
| <b>Nr1h2</b>         | 1.2264  | 0.00105  | 0.00462 | 1.16052 | 0.0027   | 0.01168 |
| <b>Tbc1d2</b>        | 1.22608 | 0.0067   | 0.02193 | 1.42019 | 0.00295  | 0.01259 |

|                      |         |          |         |         |          |         |
|----------------------|---------|----------|---------|---------|----------|---------|
| <b>Supt4h1</b>       | 1.22374 | 5.00E-05 | 0.00032 | 1.6606  | 5.00E-05 | 0.00038 |
| <b>Yy1</b>           | 1.22349 | 5.00E-05 | 0.00032 | 1.23674 | 2.00E-04 | 0.00131 |
| <b>Fam71e1</b>       | 1.22286 | 0.0062   | 0.02061 | 1.3391  | 0.0114   | 0.03786 |
| <b>Stk19</b>         | 1.21935 | 5.00E-05 | 0.00032 | 1.17741 | 0.00345  | 0.01434 |
| <b>Tomm20</b>        | 1.21906 | 5.00E-05 | 0.00032 | 1.05276 | 0.00085  | 0.00449 |
| <b>Ccdc59</b>        | 1.21905 | 0.00085  | 0.00387 | 1.57086 | 5.00E-05 | 0.00038 |
| <b>Htatip2</b>       | 1.21901 | 1.00E-04 | 0.0006  | 0.9798  | 0.00505  | 0.01952 |
| <b>ORF19</b>         | 1.21816 | 5.00E-05 | 0.00032 | 1.60875 | 5.00E-05 | 0.00038 |
| <b>Ifitm2</b>        | 1.2177  | 5.00E-05 | 0.00032 | 1.47415 | 5.00E-05 | 0.00038 |
| <b>Safb</b>          | 1.21614 | 5.00E-05 | 0.00032 | 1.21147 | 5.00E-05 | 0.00038 |
| <b>Rbm42</b>         | 1.21557 | 5.00E-05 | 0.00032 | 1.27857 | 1.00E-04 | 0.00072 |
| <b>Mkrn1</b>         | 1.21539 | 5.00E-05 | 0.00032 | 1.62276 | 3.00E-04 | 0.00184 |
| <b>Inpp4a</b>        | 1.21411 | 5.00E-05 | 0.00032 | 1.16394 | 0.00025  | 0.00159 |
| <b>Atg13</b>         | 1.21298 | 5.00E-05 | 0.00032 | 1.47932 | 0.00195  | 0.00898 |
| <b>Os9</b>           | 1.21203 | 5.00E-05 | 0.00032 | 1.76411 | 5.00E-05 | 0.00038 |
| <b>Rab11b</b>        | 1.21165 | 5.00E-05 | 0.00032 | 1.19623 | 0.0011   | 0.00557 |
| <b>Ubqln2</b>        | 1.21098 | 5.00E-05 | 0.00032 | 1.08452 | 0.00065  | 0.00359 |
| <b>Gadd45g</b>       | 1.21078 | 5.00E-05 | 0.00032 | 3.76039 | 5.00E-05 | 0.00038 |
| <b>Ctns</b>          | 1.21074 | 0.00015  | 0.00086 | 1.20357 | 5.00E-04 | 0.00287 |
| <b>Fbxl3</b>         | 1.20996 | 5.00E-05 | 0.00032 | 2.38286 | 5.00E-05 | 0.00038 |
| <b>Btf3l4</b>        | 1.20924 | 5.00E-05 | 0.00032 | 0.93974 | 0.0129   | 0.04174 |
| <b>Clpp</b>          | 1.20777 | 5.00E-05 | 0.00032 | 1.14763 | 0.00025  | 0.00159 |
| <b>Rusc2</b>         | 1.20578 | 0.0011   | 0.00481 | 1.87579 | 2.00E-04 | 0.00131 |
| <b>Hhipl1</b>        | 1.20529 | 0.0081   | 0.02564 | 2.19698 | 0.00025  | 0.00159 |
| <b>Cast</b>          | 1.20436 | 5.00E-05 | 0.00032 | 1.61224 | 1.00E-04 | 0.00072 |
| <b>Gm1840</b>        | 1.20435 | 5.00E-05 | 0.00032 | 1.49854 | 5.00E-05 | 0.00038 |
| <b>Nup98</b>         | 1.20248 | 5.00E-05 | 0.00032 | 1.10624 | 0.00055  | 0.00312 |
| <b>Ipo5</b>          | 1.20244 | 5.00E-05 | 0.00032 | 1.07418 | 0.0033   | 0.01381 |
| <b>B230312A22Rik</b> | 1.20098 | 5.00E-04 | 0.00244 | 1.93231 | 0.00035  | 0.00212 |
| <b>Sar1a</b>         | 1.20074 | 5.00E-05 | 0.00032 | 0.98632 | 0.0056   | 0.0212  |
| <b>2310044G17Rik</b> | 1.20022 | 5.00E-05 | 0.00032 | 1.20746 | 0.00045  | 0.00262 |
| <b>Orc2</b>          | 1.20001 | 0.00015  | 0.00086 | 1.64578 | 5.00E-05 | 0.00038 |
| <b>Mvp</b>           | 1.19965 | 5.00E-05 | 0.00032 | 1.98724 | 5.00E-05 | 0.00038 |
| <b>Clk4</b>          | 1.19751 | 5.00E-05 | 0.00032 | 1.60722 | 5.00E-05 | 0.00038 |
| <b>Gabarap</b>       | 1.19641 | 5.00E-05 | 0.00032 | 1.67833 | 5.00E-05 | 0.00038 |
| <b>Sec24a</b>        | 1.19536 | 5.00E-05 | 0.00032 | 1.05913 | 0.0019   | 0.0088  |
| <b>Sik3</b>          | 1.19346 | 0.0093   | 0.02871 | 1.33089 | 0.0083   | 0.02932 |
| <b>Ppp1r37</b>       | 1.19193 | 5.00E-05 | 0.00032 | 1.40215 | 0.00015  | 0.00102 |
| <b>Ing3</b>          | 1.19169 | 0.0011   | 0.00481 | 1.85091 | 5.00E-05 | 0.00038 |
| <b>Rpl3-ps1</b>      | 1.1916  | 0.00435  | 0.01528 | 1.35747 | 9.00E-04 | 0.0047  |
| <b>Klhl22</b>        | 1.19005 | 5.00E-04 | 0.00244 | 1.2643  | 0.00445  | 0.01765 |

|                      |         |          |         |         |          |         |
|----------------------|---------|----------|---------|---------|----------|---------|
| <b>Chd1</b>          | 1.18918 | 2.00E-04 | 0.00111 | 2.36422 | 5.00E-05 | 0.00038 |
| <b>Pecam1</b>        | 1.18776 | 5.00E-05 | 0.00032 | 0.93552 | 0.0041   | 0.0165  |
| <b>Rab12</b>         | 1.1867  | 5.00E-05 | 0.00032 | 1.04926 | 0.0028   | 0.01205 |
| <b>Dnaja2</b>        | 1.18544 | 5.00E-05 | 0.00032 | 1.1567  | 0.0023   | 0.01029 |
| <b>Rbl2</b>          | 1.18451 | 9.00E-04 | 0.00406 | 1.88344 | 5.00E-05 | 0.00038 |
| <b>4833442J19Rik</b> | 1.18421 | 5.00E-05 | 0.00032 | 1.11029 | 0.0022   | 0.00992 |
| <b>Sirt1</b>         | 1.18392 | 5.00E-05 | 0.00032 | 1.47245 | 5.00E-05 | 0.00038 |
| <b>Gsk3b</b>         | 1.18282 | 5.00E-05 | 0.00032 | 1.09302 | 0.0012   | 0.006   |
| <b>Skiv2l</b>        | 1.18113 | 5.00E-05 | 0.00032 | 1.40034 | 1.00E-04 | 0.00072 |
| <b>Trib3</b>         | 1.18091 | 0.00505  | 0.01733 | 2.08422 | 5.00E-05 | 0.00038 |
| <b>1810029B16Rik</b> | 1.18084 | 5.00E-05 | 0.00032 | 1.21199 | 0.00035  | 0.00212 |
| <b>Fam120b</b>       | 1.18051 | 5.00E-05 | 0.00032 | 0.9421  | 0.00235  | 0.01046 |
| <b>Rbm25</b>         | 1.17947 | 5.00E-05 | 0.00032 | 1.13832 | 0.00055  | 0.00312 |
| <b>Ubr2</b>          | 1.17932 | 5.00E-05 | 0.00032 | 1.84468 | 5.00E-05 | 0.00038 |
| <b>Ralbp1</b>        | 1.17843 | 5.00E-05 | 0.00032 | 1.60068 | 5.00E-05 | 0.00038 |
| <b>Pde9a</b>         | 1.17843 | 0.0077   | 0.02458 | 2.25007 | 5.00E-05 | 0.00038 |
| <b>Sgk3</b>          | 1.17799 | 5.00E-05 | 0.00032 | 2.68768 | 5.00E-05 | 0.00038 |
| <b>Cox8a</b>         | 1.1767  | 5.00E-05 | 0.00032 | 1.24079 | 1.00E-04 | 0.00072 |
| <b>Sart1</b>         | 1.17639 | 5.00E-05 | 0.00032 | 1.721   | 5.00E-05 | 0.00038 |
| <b>H2afj</b>         | 1.17425 | 4.00E-04 | 0.00203 | 1.2153  | 6.00E-04 | 0.00335 |
| <b>Mcl1</b>          | 1.17283 | 5.00E-05 | 0.00032 | 1.1261  | 0.00225  | 0.0101  |
| <b>Rragc</b>         | 1.17233 | 5.00E-05 | 0.00032 | 1.1777  | 0.00015  | 0.00102 |
| <b>Fam116b</b>       | 1.16924 | 5.00E-05 | 0.00032 | 1.0091  | 0.00105  | 0.00534 |
| <b>Mau2</b>          | 1.16911 | 5.00E-05 | 0.00032 | 1.08971 | 4.00E-04 | 0.00237 |
| <b>Cdk2ap2</b>       | 1.1685  | 5.00E-05 | 0.00032 | 1.84068 | 5.00E-05 | 0.00038 |
| <b>Slc41a3</b>       | 1.16701 | 5.00E-05 | 0.00032 | 1.49552 | 5.00E-05 | 0.00038 |
| <b>Rin1</b>          | 1.16684 | 0.01265  | 0.0369  | 1.48798 | 0.00175  | 0.00822 |
| <b>Pcid2</b>         | 1.16651 | 0.00095  | 0.00425 | 1.15742 | 0.00635  | 0.02351 |
| <b>Gns</b>           | 1.16616 | 5.00E-05 | 0.00032 | 1.34928 | 5.00E-05 | 0.00038 |
| <b>Tanc1</b>         | 1.1656  | 0.00505  | 0.01733 | 1.19437 | 0.0013   | 0.00641 |
| <b>Ptpn11</b>        | 1.16557 | 5.00E-05 | 0.00032 | 0.95143 | 0.00845  | 0.02973 |
| <b>Klhl21</b>        | 1.16534 | 5.00E-05 | 0.00032 | 2.64948 | 5.00E-05 | 0.00038 |
| <b>Pla2g4e</b>       | 1.16505 | 5.00E-05 | 0.00032 | 1.02798 | 0.0081   | 0.02878 |
| <b>Tmem57</b>        | 1.16445 | 5.00E-05 | 0.00032 | 1.92979 | 5.00E-05 | 0.00038 |
| <b>Clasrp</b>        | 1.16386 | 5.00E-05 | 0.00032 | 1.96122 | 5.00E-05 | 0.00038 |
| <b>Pikfyve</b>       | 1.16383 | 0.0017   | 0.00699 | 1.29382 | 0.00155  | 0.00742 |
| <b>Mll2</b>          | 1.16354 | 5.00E-05 | 0.00032 | 0.84112 | 0.00905  | 0.03147 |
| <b>Pxn</b>           | 1.16274 | 5.00E-05 | 0.00032 | 0.85072 | 0.01345  | 0.04324 |
| <b>Rnf146</b>        | 1.16237 | 5.00E-05 | 0.00032 | 1.19624 | 0.00145  | 0.00702 |
| <b>Ick</b>           | 1.1623  | 4.00E-04 | 0.00203 | 1.92451 | 5.00E-05 | 0.00038 |
| <b>Hmox1</b>         | 1.16226 | 0.00015  | 0.00086 | 2.02995 | 5.00E-05 | 0.00038 |

|                      |         |          |         |         |          |         |
|----------------------|---------|----------|---------|---------|----------|---------|
| <b>Unkl</b>          | 1.16139 | 5.00E-05 | 0.00032 | 1.19315 | 0.0029   | 0.01242 |
| <b>Setd1a</b>        | 1.16091 | 5.00E-05 | 0.00032 | 1.10091 | 0.00225  | 0.0101  |
| <b>Hnrnpu</b>        | 1.15998 | 0.00105  | 0.00462 | 1.3165  | 0.0038   | 0.01556 |
| <b>Smyd4</b>         | 1.1597  | 0.0119   | 0.03509 | 1.34439 | 0.0065   | 0.02397 |
| <b>Ly6c1</b>         | 1.15879 | 5.00E-05 | 0.00032 | 1.44639 | 5.00E-05 | 0.00038 |
| <b>Snw1</b>          | 1.15794 | 5.00E-05 | 0.00032 | 1.50143 | 2.00E-04 | 0.00131 |
| <b>Snhg3</b>         | 1.15704 | 0.0131   | 0.03794 | 1.73224 | 0.01525  | 0.04762 |
| <b>Cttn</b>          | 1.15678 | 0.0011   | 0.00481 | 1.45997 | 6.00E-04 | 0.00335 |
| <b>Clk1</b>          | 1.15599 | 5.00E-05 | 0.00032 | 1.74382 | 5.00E-05 | 0.00038 |
| <b>2410001C21Rik</b> | 1.15472 | 5.00E-05 | 0.00032 | 0.86348 | 0.0056   | 0.0212  |
| <b>Zmiz1</b>         | 1.15393 | 5.00E-05 | 0.00032 | 1.76414 | 1.00E-04 | 0.00072 |
| <b>Ftl1</b>          | 1.15315 | 5.00E-05 | 0.00032 | 1.34443 | 5.00E-05 | 0.00038 |
| <b>Rnf20</b>         | 1.15307 | 1.00E-04 | 0.0006  | 1.31354 | 0.00025  | 0.00159 |
| <b>Ccdc86</b>        | 1.15262 | 5.00E-05 | 0.00032 | 0.85569 | 0.0047   | 0.01846 |
| <b>Zmym5</b>         | 1.15242 | 5.00E-05 | 0.00032 | 1.59773 | 5.00E-05 | 0.00038 |
| <b>Tut1</b>          | 1.15208 | 5.00E-05 | 0.00032 | 1.24595 | 5.00E-05 | 0.00038 |
| <b>Atg2a</b>         | 1.15197 | 5.00E-05 | 0.00032 | 1.79359 | 5.00E-05 | 0.00038 |
| <b>Gpihbp1</b>       | 1.15101 | 5.00E-05 | 0.00032 | 1.0173  | 8.00E-04 | 0.00427 |
| <b>Use1</b>          | 1.15095 | 5.00E-05 | 0.00032 | 1.01347 | 0.0011   | 0.00557 |
| <b>Tmem86b</b>       | 1.14966 | 0.0144   | 0.04093 | 1.45185 | 0.00875  | 0.03061 |
| <b>Leng8</b>         | 1.14917 | 5.00E-05 | 0.00032 | 0.90617 | 0.00865  | 0.0303  |
| <b>Eif4a2</b>        | 1.14842 | 5.00E-05 | 0.00032 | 1.21068 | 0.0043   | 0.01712 |
| <b>Kri1</b>          | 1.14704 | 0.00115  | 0.005   | 1.43374 | 0.00595  | 0.02226 |
| <b>Eif3c</b>         | 1.14634 | 5.00E-05 | 0.00032 | 1.18027 | 0.0049   | 0.01905 |
| <b>Ehd3</b>          | 1.14602 | 0.00015  | 0.00086 | 1.86431 | 5.00E-05 | 0.00038 |
| <b>Atoh8</b>         | 1.14479 | 5.00E-05 | 0.00032 | 1.39119 | 5.00E-05 | 0.00038 |
| <b>Dtnbp1</b>        | 1.14381 | 5.00E-05 | 0.00032 | 1.87157 | 5.00E-05 | 0.00038 |
| <b>Cpsf6</b>         | 1.142   | 5.00E-05 | 0.00032 | 1.00789 | 0.00295  | 0.01259 |
| <b>Man1a2</b>        | 1.14182 | 5.00E-05 | 0.00032 | 2.09068 | 3.00E-04 | 0.00184 |
| <b>Eif3d</b>         | 1.14008 | 5.00E-05 | 0.00032 | 1.10279 | 0.00065  | 0.00359 |
| <b>Znhit2-ps</b>     | 1.13952 | 3.00E-04 | 0.00158 | 1.42149 | 1.00E-04 | 0.00072 |
| <b>Anp32b</b>        | 1.13949 | 5.00E-05 | 0.00032 | 1.33896 | 5.00E-05 | 0.00038 |
| <b>Gtf2b</b>         | 1.13935 | 5.00E-05 | 0.00032 | 0.90592 | 0.00385  | 0.01572 |
| <b>Myog</b>          | 1.13933 | 0.00075  | 0.00349 | 3.31932 | 5.00E-05 | 0.00038 |
| <b>Appl2</b>         | 1.13874 | 6.00E-04 | 0.00286 | 1.61728 | 6.00E-04 | 0.00335 |
| <b>Cnnm3</b>         | 1.13813 | 0.00065  | 0.00308 | 1.69067 | 5.00E-05 | 0.00038 |
| <b>Zc3h3</b>         | 1.13708 | 0.00075  | 0.00349 | 1.80417 | 5.00E-05 | 0.00038 |
| <b>Arhgap27</b>      | 1.13706 | 0.00225  | 0.00883 | 1.25447 | 0.00085  | 0.00449 |
| <b>Pde4c</b>         | 1.13675 | 5.00E-05 | 0.00032 | 1.2045  | 0.00095  | 0.00492 |
| <b>Eif2b1</b>        | 1.13618 | 5.00E-05 | 0.00032 | 0.97356 | 0.01375  | 0.04407 |
| <b>Bfar</b>          | 1.13564 | 5.00E-05 | 0.00032 | 0.96439 | 0.00245  | 0.01083 |

|                      |         |          |         |         |          |         |
|----------------------|---------|----------|---------|---------|----------|---------|
| <b>Kctd9</b>         | 1.13552 | 0.00345  | 0.01257 | 1.36716 | 0.00215  | 0.00974 |
| <b>Nfe2l2</b>        | 1.13515 | 5.00E-05 | 0.00032 | 1.00765 | 0.0048   | 0.01873 |
| <b>Miip</b>          | 1.13394 | 0.0013   | 0.00554 | 1.61973 | 9.00E-04 | 0.0047  |
| <b>Prrc1</b>         | 1.13287 | 0.00075  | 0.00349 | 1.33864 | 0.0062   | 0.02306 |
| <b>Fam76b</b>        | 1.1326  | 5.00E-05 | 0.00032 | 1.08274 | 0.00055  | 0.00312 |
| <b>Edn1</b>          | 1.13104 | 0.003    | 0.01117 | 2.23288 | 5.00E-05 | 0.00038 |
| <b>Zfp598</b>        | 1.13062 | 5.00E-05 | 0.00032 | 1.31607 | 5.00E-05 | 0.00038 |
| <b>Ldb1</b>          | 1.13008 | 1.00E-04 | 0.0006  | 1.4523  | 0.00035  | 0.00212 |
| <b>Golga4</b>        | 1.12877 | 5.00E-05 | 0.00032 | 1.45108 | 0.00215  | 0.00974 |
| <b>Cyth2</b>         | 1.12855 | 5.00E-05 | 0.00032 | 1.46764 | 5.00E-05 | 0.00038 |
| <b>Anxa11</b>        | 1.12838 | 5.00E-05 | 0.00032 | 1.28375 | 0.00015  | 0.00102 |
| <b>Ints12</b>        | 1.12743 | 0.00205  | 0.00814 | 1.04133 | 0.0076   | 0.02728 |
| <b>Cct4</b>          | 1.1272  | 5.00E-05 | 0.00032 | 1.14589 | 5.00E-04 | 0.00287 |
| <b>Wwp2</b>          | 1.12687 | 5.00E-05 | 0.00032 | 1.77798 | 5.00E-05 | 0.00038 |
| <b>Ccdc9</b>         | 1.12612 | 0.0048   | 0.01661 | 1.53141 | 0.0026   | 0.01132 |
| <b>Ccar1</b>         | 1.12433 | 5.00E-05 | 0.00032 | 1.2306  | 5.00E-05 | 0.00038 |
| <b>Crbn</b>          | 1.12352 | 5.00E-05 | 0.00032 | 1.28105 | 0.00305  | 0.01292 |
| <b>Adnp2</b>         | 1.12337 | 5.00E-05 | 0.00032 | 2.16203 | 5.00E-05 | 0.00038 |
| <b>Zfp143</b>        | 1.1214  | 5.00E-05 | 0.00032 | 1.63558 | 5.00E-05 | 0.00038 |
| <b>Sec31a</b>        | 1.12115 | 5.00E-05 | 0.00032 | 1.1333  | 6.00E-04 | 0.00335 |
| <b>Tbrg1</b>         | 1.11857 | 5.00E-05 | 0.00032 | 1.09297 | 0.00025  | 0.00159 |
| <b>Musk</b>          | 1.117   | 0.00025  | 0.00135 | 3.46593 | 5.00E-05 | 0.00038 |
| <b>Rasa2</b>         | 1.11645 | 0.00015  | 0.00086 | 1.79423 | 5.00E-05 | 0.00038 |
| <b>Max</b>           | 1.11631 | 5.00E-05 | 0.00032 | 1.26755 | 5.00E-05 | 0.00038 |
| <b>Srp19</b>         | 1.11594 | 5.00E-05 | 0.00032 | 0.98856 | 0.00195  | 0.00898 |
| <b>Slc22a4</b>       | 1.11481 | 1.00E-04 | 0.0006  | 1.4406  | 0.00085  | 0.00449 |
| <b>Supt5h</b>        | 1.11407 | 5.00E-05 | 0.00032 | 1.24191 | 4.00E-04 | 0.00237 |
| <b>Gm17282</b>       | 1.11392 | 0.00265  | 0.01011 | 1.24313 | 0.0035   | 0.01447 |
| <b>Spry1</b>         | 1.11346 | 5.00E-05 | 0.00032 | 0.97379 | 0.00215  | 0.00974 |
| <b>Smad5</b>         | 1.11238 | 5.00E-05 | 0.00032 | 1.14779 | 6.00E-04 | 0.00335 |
| <b>Tapt1</b>         | 1.11144 | 5.00E-05 | 0.00032 | 0.77824 | 0.01595  | 0.04932 |
| <b>Zfp775</b>        | 1.11112 | 5.00E-05 | 0.00032 | 1.44143 | 5.00E-05 | 0.00038 |
| <b>Bag5</b>          | 1.11109 | 5.00E-05 | 0.00032 | 1.38484 | 5.00E-05 | 0.00038 |
| <b>Atad3a</b>        | 1.10952 | 1.00E-04 | 0.0006  | 1.03889 | 0.01135  | 0.03772 |
| <b>Brd4</b>          | 1.10815 | 5.00E-05 | 0.00032 | 1.20177 | 0.00015  | 0.00102 |
| <b>Pdcd6ip</b>       | 1.10791 | 5.00E-05 | 0.00032 | 1.06968 | 5.00E-04 | 0.00287 |
| <b>1300018J18Rik</b> | 1.10608 | 0.00175  | 0.00715 | 1.27933 | 0.01125  | 0.03746 |
| <b>Bckdha</b>        | 1.10372 | 5.00E-05 | 0.00032 | 1.24531 | 7.00E-04 | 0.00383 |
| <b>Prickle3</b>      | 1.10371 | 5.00E-05 | 0.00032 | 1.73145 | 0.00015  | 0.00102 |
| <b>Rhpn2</b>         | 1.10297 | 0.00295  | 0.01104 | 2.36283 | 5.00E-05 | 0.00038 |
| <b>Riok1</b>         | 1.10218 | 5.00E-05 | 0.00032 | 1.36532 | 0.00015  | 0.00102 |

|                      |         |          |         |         |          |         |
|----------------------|---------|----------|---------|---------|----------|---------|
| <b>Abi1</b>          | 1.10187 | 0.00235  | 0.00914 | 1.96935 | 5.00E-05 | 0.00038 |
| <b>Srsf10</b>        | 1.10184 | 5.00E-05 | 0.00032 | 1.27093 | 1.00E-04 | 0.00072 |
| <b>Klf9</b>          | 1.1012  | 5.00E-05 | 0.00032 | 1.22843 | 0.00045  | 0.00262 |
| <b>Khynyn</b>        | 1.10029 | 5.00E-05 | 0.00032 | 1.33257 | 1.00E-04 | 0.00072 |
| <b>5730469M10Rik</b> | 1.09959 | 5.00E-05 | 0.00032 | 1.84233 | 5.00E-05 | 0.00038 |
| <b>Zfp932</b>        | 1.09927 | 0.01695  | 0.04676 | 2.22685 | 1.00E-04 | 0.00072 |
| <b>Txndc9</b>        | 1.09901 | 5.00E-05 | 0.00032 | 1.16327 | 6.00E-04 | 0.00335 |
| <b>Slc7a1</b>        | 1.09866 | 0.00045  | 0.00224 | 1.0708  | 0.0026   | 0.01132 |
| <b>Matr3</b>         | 1.09858 | 5.00E-05 | 0.00032 | 1.17786 | 5.00E-04 | 0.00287 |
| <b>Acbd3</b>         | 1.09841 | 5.00E-05 | 0.00032 | 1.08537 | 0.00045  | 0.00262 |
| <b>Rnf169</b>        | 1.09813 | 5.00E-05 | 0.00032 | 1.60691 | 5.00E-05 | 0.00038 |
| <b>Ankrd54</b>       | 1.09773 | 0.0017   | 0.00699 | 1.68185 | 5.00E-05 | 0.00038 |
| <b>Pnpla8</b>        | 1.0963  | 5.00E-05 | 0.00032 | 1.14585 | 0.0052   | 0.01999 |
| <b>Crebbp</b>        | 1.09615 | 5.00E-05 | 0.00032 | 0.98414 | 9.00E-04 | 0.0047  |
| <b>Dbt</b>           | 1.09606 | 5.00E-05 | 0.00032 | 1.4225  | 1.00E-04 | 0.00072 |
| <b>Mrpl9</b>         | 1.09559 | 5.00E-05 | 0.00032 | 1.2279  | 5.00E-05 | 0.00038 |
| <b>Neu1</b>          | 1.0938  | 0.0044   | 0.01543 | 1.60506 | 5.00E-05 | 0.00038 |
| <b>Rbm7</b>          | 1.09116 | 1.00E-04 | 0.0006  | 1.02237 | 0.0011   | 0.00557 |
| <b>Bmp2k</b>         | 1.09062 | 0.00045  | 0.00224 | 1.17419 | 0.0015   | 0.00723 |
| <b>1810058I24Rik</b> | 1.08981 | 5.00E-05 | 0.00032 | 0.9878  | 0.003    | 0.01275 |
| <b>Sec24b</b>        | 1.08849 | 5.00E-04 | 0.00244 | 1.12667 | 0.00525  | 0.02013 |
| <b>Pfdn2</b>         | 1.08814 | 5.00E-05 | 0.00032 | 1.37687 | 0.00025  | 0.00159 |
| <b>Zfp318</b>        | 1.088   | 1.00E-04 | 0.0006  | 1.69811 | 2.00E-04 | 0.00131 |
| <b>Eif4b</b>         | 1.08765 | 5.00E-05 | 0.00032 | 1.49779 | 0.00025  | 0.00159 |
| <b>Smad4</b>         | 1.08543 | 0.00065  | 0.00308 | 1.2828  | 1.00E-04 | 0.00072 |
| <b>A530013C23Rik</b> | 1.08512 | 0.00055  | 0.00266 | 1.2776  | 8.00E-04 | 0.00427 |
| <b>Peg3</b>          | 1.08415 | 5.00E-05 | 0.00032 | 0.9126  | 0.01335  | 0.04295 |
| <b>Gar1</b>          | 1.07968 | 0.0054   | 0.01832 | 1.12997 | 0.00965  | 0.03319 |
| <b>Cep57I1</b>       | 1.07857 | 0.00095  | 0.00425 | 1.01545 | 0.00625  | 0.0232  |
| <b>Zfp622</b>        | 1.07856 | 5.00E-05 | 0.00032 | 1.59642 | 5.00E-05 | 0.00038 |
| <b>Phf2</b>          | 1.07796 | 5.00E-05 | 0.00032 | 1.29746 | 1.00E-04 | 0.00072 |
| <b>Nrbp1</b>         | 1.07679 | 5.00E-05 | 0.00032 | 1.15609 | 2.00E-04 | 0.00131 |
| <b>Cdc40</b>         | 1.07546 | 4.00E-04 | 0.00203 | 0.89731 | 0.01585  | 0.04908 |
| <b>Repin1</b>        | 1.07423 | 5.00E-05 | 0.00032 | 1.93186 | 5.00E-05 | 0.00038 |
| <b>Tbl1xr1</b>       | 1.07409 | 5.00E-05 | 0.00032 | 1.44914 | 5.00E-05 | 0.00038 |
| <b>Ahnak2</b>        | 1.07399 | 0.00025  | 0.00135 | 2.99412 | 5.00E-05 | 0.00038 |
| <b>Ctdspl</b>        | 1.07398 | 0.001    | 0.00445 | 1.4757  | 1.00E-04 | 0.00072 |
| <b>Ppp1r15b</b>      | 1.07368 | 5.00E-05 | 0.00032 | 0.9791  | 0.00125  | 0.00621 |
| <b>Ly6c2</b>         | 1.07339 | 0.0024   | 0.00929 | 1.25156 | 9.00E-04 | 0.0047  |
| <b>Rlf</b>           | 1.07204 | 1.00E-04 | 0.0006  | 1.28816 | 5.00E-05 | 0.00038 |
| <b>Nasp</b>          | 1.07159 | 3.00E-04 | 0.00158 | 1.12505 | 0.00155  | 0.00742 |

|                 |         |          |         |         |          |         |
|-----------------|---------|----------|---------|---------|----------|---------|
| <b>Cpsf7</b>    | 1.07151 | 5.00E-05 | 0.00032 | 1.1843  | 0.00025  | 0.00159 |
| <b>Sephs2</b>   | 1.06867 | 5.00E-05 | 0.00032 | 1.0985  | 0.00085  | 0.00449 |
| <b>Al317395</b> | 1.06576 | 0.00035  | 0.00181 | 0.89619 | 0.01455  | 0.04583 |
| <b>Pcgf5</b>    | 1.06487 | 5.00E-05 | 0.00032 | 1.65867 | 5.00E-05 | 0.00038 |
| <b>Crnkl1</b>   | 1.0648  | 5.00E-05 | 0.00032 | 0.81964 | 0.0083   | 0.02932 |
| <b>Xrcc1</b>    | 1.06319 | 5.00E-05 | 0.00032 | 1.30382 | 5.00E-05 | 0.00038 |
| <b>Zfp330</b>   | 1.06195 | 5.00E-05 | 0.00032 | 1.10624 | 9.00E-04 | 0.0047  |
| <b>Cln5</b>     | 1.0618  | 5.00E-05 | 0.00032 | 0.98808 | 0.0012   | 0.006   |
| <b>Gm14149</b>  | 1.06129 | 0.00045  | 0.00224 | 0.94084 | 0.0035   | 0.01447 |
| <b>Eps15l1</b>  | 1.06054 | 5.00E-05 | 0.00032 | 1.21096 | 5.00E-05 | 0.00038 |
| <b>Gclc</b>     | 1.05817 | 1.00E-04 | 0.0006  | 1.56282 | 5.00E-05 | 0.00038 |
| <b>Pitpnb</b>   | 1.05785 | 5.00E-05 | 0.00032 | 1.11935 | 0.00035  | 0.00212 |
| <b>Bcl10</b>    | 1.05784 | 5.00E-05 | 0.00032 | 0.93813 | 0.0024   | 0.01064 |
| <b>Ccng2</b>    | 1.05743 | 5.00E-05 | 0.00032 | 1.49032 | 5.00E-05 | 0.00038 |
| <b>Snap29</b>   | 1.05587 | 9.00E-04 | 0.00406 | 1.23548 | 0.0077   | 0.0276  |
| <b>Sec62</b>    | 1.05136 | 5.00E-05 | 0.00032 | 1.02508 | 0.00115  | 0.00578 |
| <b>Ddx54</b>    | 1.05127 | 5.00E-05 | 0.00032 | 1.18698 | 2.00E-04 | 0.00131 |
| <b>Cyrr1</b>    | 1.05067 | 5.00E-05 | 0.00032 | 1.21916 | 5.00E-05 | 0.00038 |
| <b>Gm17238</b>  | 1.04886 | 0.01755  | 0.04811 | 1.85485 | 0.002    | 0.00918 |
| <b>Ube2j1</b>   | 1.04863 | 2.00E-04 | 0.00111 | 1.05596 | 0.0111   | 0.03702 |
| <b>Zfp703</b>   | 1.04861 | 5.00E-05 | 0.00032 | 1.90196 | 5.00E-05 | 0.00038 |
| <b>Usp30</b>    | 1.04833 | 5.00E-05 | 0.00032 | 1.06885 | 9.00E-04 | 0.0047  |
| <b>Rela</b>     | 1.04809 | 5.00E-05 | 0.00032 | 1.53118 | 5.00E-05 | 0.00038 |
| <b>Lmo1</b>     | 1.04794 | 0.01205  | 0.03542 | 1.73754 | 8.00E-04 | 0.00427 |
| <b>Glyr1</b>    | 1.04775 | 5.00E-05 | 0.00032 | 0.95142 | 0.0031   | 0.01309 |
| <b>Morc2a</b>   | 1.04685 | 0.0016   | 0.00663 | 1.37075 | 5.00E-05 | 0.00038 |
| <b>Ube2i</b>    | 1.04678 | 5.00E-05 | 0.00032 | 1.24491 | 1.00E-04 | 0.00072 |
| <b>Atp6v0d1</b> | 1.04628 | 5.00E-05 | 0.00032 | 1.0363  | 4.00E-04 | 0.00237 |
| <b>Aldh2</b>    | 1.04531 | 1.00E-04 | 0.0006  | 1.23302 | 8.00E-04 | 0.00427 |
| <b>Kdm4b</b>    | 1.04412 | 0.00095  | 0.00425 | 1.02223 | 0.00175  | 0.00822 |
| <b>Wdr46</b>    | 1.04392 | 3.00E-04 | 0.00158 | 1.00317 | 0.00195  | 0.00898 |
| <b>Hnrnpul1</b> | 1.04377 | 5.00E-05 | 0.00032 | 1.22437 | 1.00E-04 | 0.00072 |
| <b>Foxj3</b>    | 1.04333 | 2.00E-04 | 0.00111 | 1.45709 | 5.00E-05 | 0.00038 |
| <b>Ddb1</b>     | 1.04245 | 5.00E-05 | 0.00032 | 1.18645 | 0.00225  | 0.0101  |
| <b>U2af1</b>    | 1.04235 | 5.00E-05 | 0.00032 | 1.12877 | 0.00035  | 0.00212 |
| <b>Klf4</b>     | 1.04149 | 5.00E-05 | 0.00032 | 0.88022 | 0.00515  | 0.01983 |
| <b>Vps16</b>    | 1.04146 | 0.01275  | 0.03713 | 1.43222 | 0.00785  | 0.02805 |
| <b>Tmem120a</b> | 1.04086 | 5.00E-04 | 0.00244 | 2.2533  | 5.00E-05 | 0.00038 |
| <b>Pdcd6</b>    | 1.04082 | 5.00E-05 | 0.00032 | 1.06836 | 6.00E-04 | 0.00335 |
| <b>Ankzf1</b>   | 1.04026 | 0.008    | 0.02536 | 1.34365 | 0.00555  | 0.02105 |
| <b>Samd14</b>   | 1.03944 | 0.0026   | 0.00995 | 0.98686 | 0.0102   | 0.03456 |



|                      |         |          |         |         |          |         |
|----------------------|---------|----------|---------|---------|----------|---------|
| <b>Samd4b</b>        | 1.03775 | 5.00E-05 | 0.00032 | 0.90821 | 0.0037   | 0.01519 |
| <b>Pdp2</b>          | 1.03597 | 0.00125  | 0.00536 | 1.6306  | 3.00E-04 | 0.00184 |
| <b>Tmem50a</b>       | 1.03557 | 5.00E-05 | 0.00032 | 2.40022 | 5.00E-05 | 0.00038 |
| <b>Gtf2a1</b>        | 1.03424 | 4.00E-04 | 0.00203 | 0.81567 | 0.01455  | 0.04583 |
| <b>Ppm1g</b>         | 1.03377 | 5.00E-05 | 0.00032 | 1.38736 | 5.00E-05 | 0.00038 |
| <b>2810008D09Rik</b> | 1.03324 | 0.002    | 0.00799 | 1.12815 | 0.00415  | 0.01665 |
| <b>Izumo4</b>        | 1.03279 | 0.0091   | 0.02821 | 2.0099  | 1.00E-04 | 0.00072 |
| <b>Dcaf13</b>        | 1.03202 | 5.00E-05 | 0.00032 | 1.12186 | 0.00055  | 0.00312 |
| <b>Rbm17</b>         | 1.03043 | 0.00635  | 0.02101 | 1.15572 | 0.00855  | 0.02999 |
| <b>Rnf19b</b>        | 1.02985 | 5.00E-05 | 0.00032 | 1.03851 | 0.00105  | 0.00534 |
| <b>Arih2</b>         | 1.02919 | 5.00E-05 | 0.00032 | 1.07881 | 0.00145  | 0.00702 |
| <b>Eif3e</b>         | 1.02915 | 5.00E-05 | 0.00032 | 1.1273  | 0.00095  | 0.00492 |
| <b>Bahd1</b>         | 1.02834 | 0.00025  | 0.00135 | 1.34047 | 5.00E-05 | 0.00038 |
| <b>Gtdc1</b>         | 1.02585 | 3.00E-04 | 0.00158 | 0.71615 | 0.0149   | 0.04671 |
| <b>Ewsr1</b>         | 1.02522 | 0.003    | 0.01117 | 1.22473 | 0.00645  | 0.02382 |
| <b>Gtf2h1</b>        | 1.02507 | 5.00E-05 | 0.00032 | 1.28232 | 0.00025  | 0.00159 |
| <b>Gatad2b</b>       | 1.02419 | 1.00E-04 | 0.0006  | 1.39225 | 5.00E-05 | 0.00038 |
| <b>E4f1</b>          | 1.02357 | 5.00E-05 | 0.00032 | 1.45935 | 5.00E-05 | 0.00038 |
| <b>Prkd1</b>         | 1.02252 | 0.0025   | 0.00962 | 1.27228 | 0.00075  | 0.00405 |
| <b>Rbm39</b>         | 1.02215 | 5.00E-05 | 0.00032 | 1.20621 | 3.00E-04 | 0.00184 |
| <b>Chd7</b>          | 1.02044 | 0.00015  | 0.00086 | 2.04935 | 5.00E-05 | 0.00038 |
| <b>Lmna</b>          | 1.01869 | 5.00E-05 | 0.00032 | 1.00736 | 0.0025   | 0.011   |
| <b>Rere</b>          | 1.01864 | 0.00235  | 0.00914 | 1.40753 | 6.00E-04 | 0.00335 |
| <b>Zkscan3</b>       | 1.01791 | 1.00E-04 | 0.0006  | 0.79229 | 0.01415  | 0.04492 |
| <b>Mrpl32</b>        | 1.01781 | 5.00E-05 | 0.00032 | 0.87848 | 0.0035   | 0.01447 |
| <b>Srrt</b>          | 1.01741 | 5.00E-05 | 0.00032 | 0.75239 | 0.014    | 0.04456 |
| <b>Fxyd5</b>         | 1.01683 | 0.0015   | 0.00627 | 2.0652  | 5.00E-05 | 0.00038 |
| <b>Prkcq</b>         | 1.0159  | 5.00E-05 | 0.00032 | 1.68494 | 5.00E-05 | 0.00038 |
| <b>Slc25a27</b>      | 1.01421 | 0.00015  | 0.00086 | 1.61267 | 5.00E-05 | 0.00038 |
| <b>Golga3</b>        | 1.01354 | 0.00045  | 0.00224 | 1.07191 | 0.00125  | 0.00621 |
| <b>Mast2</b>         | 1.01328 | 4.00E-04 | 0.00203 | 1.4501  | 2.00E-04 | 0.00131 |
| <b>Tbx2</b>          | 1.01221 | 0.0015   | 0.00627 | 1.56746 | 5.00E-05 | 0.00038 |
| <b>Slc7a6os</b>      | 1.01143 | 2.00E-04 | 0.00111 | 1.3662  | 1.00E-04 | 0.00072 |
| <b>Zdhhc14</b>       | 1.0107  | 0.003    | 0.01117 | 1.90056 | 5.00E-05 | 0.00038 |
| <b>Bzw1</b>          | 1.01053 | 5.00E-05 | 0.00032 | 0.78209 | 0.0161   | 0.0496  |
| <b>Cbx7</b>          | 1.00996 | 8.00E-04 | 0.00368 | 1.67508 | 5.00E-05 | 0.00038 |
| <b>Mfng</b>          | 1.00874 | 0.0029   | 0.0109  | 0.96564 | 0.01035  | 0.03496 |
| <b>C330006K01Rik</b> | 1.00865 | 3.00E-04 | 0.00158 | 0.97157 | 0.00595  | 0.02226 |
| <b>Tspan15</b>       | 1.00736 | 1.00E-04 | 0.0006  | 1.3188  | 1.00E-04 | 0.00072 |
| <b>Cdk11b</b>        | 1.00731 | 0.00175  | 0.00715 | 1.09537 | 0.00535  | 0.0204  |
| <b>Gzf1</b>          | 1.0073  | 5.00E-05 | 0.00032 | 1.95273 | 5.00E-05 | 0.00038 |

|                      |         |          |         |         |          |         |
|----------------------|---------|----------|---------|---------|----------|---------|
| <b>Zhx2</b>          | 1.00718 | 5.00E-05 | 0.00032 | -2.4832 | 5.00E-05 | 0.00038 |
| <b>Kdm1a</b>         | 1.00694 | 0.0034   | 0.01243 | 1.10799 | 0.0073   | 0.02642 |
| <b>Phf15</b>         | 1.0057  | 5.00E-05 | 0.00032 | 1.72887 | 5.00E-05 | 0.00038 |
| <b>Llph</b>          | 1.00544 | 0.00025  | 0.00135 | 1.68831 | 5.00E-05 | 0.00038 |
| <b>Tns1</b>          | 1.00526 | 5.00E-05 | 0.00032 | 1.03738 | 0.0102   | 0.03456 |
| <b>Ankhd1</b>        | 1.00516 | 0.00105  | 0.00462 | 0.90642 | 0.00895  | 0.03119 |
| <b>Dctn2</b>         | 1.0045  | 5.00E-05 | 0.00032 | 1.06198 | 0.00175  | 0.00822 |
| <b>Ngdn</b>          | 1.0039  | 5.00E-05 | 0.00032 | 1.26099 | 1.00E-04 | 0.00072 |
| <b>Gmeb2</b>         | 1.00316 | 0.00055  | 0.00266 | 1.47715 | 5.00E-05 | 0.00038 |
| <b>Relb</b>          | 1.00195 | 8.00E-04 | 0.00368 | 1.06343 | 0.00365  | 0.01502 |
| <b>Klhl7</b>         | 1.00167 | 5.00E-05 | 0.00032 | 1.26118 | 8.00E-04 | 0.00427 |
| <b>Ddx46</b>         | 0.9996  | 5.00E-05 | 0.00032 | 1.33529 | 5.00E-05 | 0.00038 |
| <b>Atf6</b>          | 0.99891 | 5.00E-05 | 0.00032 | 0.73354 | 0.0156   | 0.04844 |
| <b>Zfp110</b>        | 0.99736 | 1.00E-04 | 0.0006  | 1.54173 | 5.00E-05 | 0.00038 |
| <b>Snx2</b>          | 0.99625 | 5.00E-05 | 0.00032 | 1.02043 | 9.00E-04 | 0.0047  |
| <b>D19Erttd386e</b>  | 0.99617 | 0.00275  | 0.01043 | 1.34481 | 0.00085  | 0.00449 |
| <b>Ddx10</b>         | 0.9961  | 5.00E-05 | 0.00032 | 0.7903  | 0.0114   | 0.03786 |
| <b>1110012L19Rik</b> | 0.99601 | 1.00E-04 | 0.0006  | 1.22588 | 0.00015  | 0.00102 |
| <b>2810403A07Rik</b> | 0.99541 | 5.00E-05 | 0.00032 | 1.19825 | 3.00E-04 | 0.00184 |
| <b>Mta1</b>          | 0.99527 | 1.00E-04 | 0.0006  | 1.57127 | 5.00E-05 | 0.00038 |
| <b>Exosc5</b>        | 0.99435 | 5.00E-05 | 0.00032 | 1.45371 | 5.00E-05 | 0.00038 |
| <b>Plvap</b>         | 0.99364 | 0.0022   | 0.00865 | 2.0768  | 5.00E-05 | 0.00038 |
| <b>Bud13</b>         | 0.99343 | 5.00E-05 | 0.00032 | 0.98264 | 0.0016   | 0.00763 |
| <b>Zfp704</b>        | 0.99313 | 5.00E-05 | 0.00032 | 1.01544 | 0.0013   | 0.00641 |
| <b>Snip1</b>         | 0.99259 | 6.00E-04 | 0.00286 | 0.85668 | 0.01025  | 0.0347  |
| <b>Hmga1-rs1</b>     | 0.99245 | 0.00045  | 0.00224 | 1.2307  | 3.00E-04 | 0.00184 |
| <b>Impdh2</b>        | 0.99173 | 5.00E-05 | 0.00032 | 1.07277 | 6.00E-04 | 0.00335 |
| <b>Aamp</b>          | 0.99137 | 5.00E-05 | 0.00032 | 0.84756 | 0.0101   | 0.03434 |
| <b>Wdr60</b>         | 0.98959 | 5.00E-05 | 0.00032 | 1.47025 | 5.00E-05 | 0.00038 |
| <b>Ptbp2</b>         | 0.98934 | 5.00E-05 | 0.00032 | 0.98094 | 0.0013   | 0.00641 |
| <b>Elmo1</b>         | 0.98922 | 0.0024   | 0.00929 | 0.94254 | 0.0092   | 0.03192 |
| <b>Nipbl</b>         | 0.98899 | 5.00E-05 | 0.00032 | 1.11445 | 4.00E-04 | 0.00237 |
| <b>Tnfrsf21</b>      | 0.98884 | 5.00E-05 | 0.00032 | 1.2884  | 0.00015  | 0.00102 |
| <b>Mcf2l</b>         | 0.98806 | 0.0114   | 0.03389 | 1.5878  | 0.01625  | 0.05    |
| <b>Mxd4</b>          | 0.9876  | 5.00E-05 | 0.00032 | 1.01436 | 8.00E-04 | 0.00427 |
| <b>Usp39</b>         | 0.98667 | 5.00E-05 | 0.00032 | 0.92167 | 0.00205  | 0.00937 |
| <b>Paxip1</b>        | 0.98506 | 5.00E-05 | 0.00032 | 1.20578 | 2.00E-04 | 0.00131 |
| <b>Tmem214</b>       | 0.98425 | 0.00045  | 0.00224 | 0.87931 | 0.00835  | 0.02947 |
| <b>Rpl11</b>         | 0.9842  | 5.00E-05 | 0.00032 | 1.13673 | 7.00E-04 | 0.00383 |
| <b>Slc20a2</b>       | 0.98416 | 5.00E-05 | 0.00032 | 1.28171 | 0.0012   | 0.006   |
| <b>Peli1</b>         | 0.98262 | 5.00E-05 | 0.00032 | 1.66255 | 5.00E-05 | 0.00038 |

|                 |         |          |         |         |          |         |
|-----------------|---------|----------|---------|---------|----------|---------|
| <b>Arl8b</b>    | 0.98247 | 5.00E-05 | 0.00032 | 1.12184 | 0.00145  | 0.00702 |
| <b>Dis3l2</b>   | 0.98135 | 5.00E-05 | 0.00032 | 0.85702 | 0.00495  | 0.01919 |
| <b>Sin3b</b>    | 0.98057 | 5.00E-05 | 0.00032 | 0.85472 | 0.01405  | 0.04467 |
| <b>Igfbp1</b>   | 0.98036 | 5.00E-05 | 0.00032 | 1.09871 | 4.00E-04 | 0.00237 |
| <b>Fam117b</b>  | 0.97955 | 3.00E-04 | 0.00158 | 1.83923 | 5.00E-05 | 0.00038 |
| <b>Gfod1</b>    | 0.97877 | 0.00055  | 0.00266 | 0.80948 | 0.0134   | 0.04309 |
| <b>Smc5</b>     | 0.97792 | 2.00E-04 | 0.00111 | 1.69326 | 5.00E-05 | 0.00038 |
| <b>Patl1</b>    | 0.97727 | 5.00E-05 | 0.00032 | 1.13    | 5.00E-04 | 0.00287 |
| <b>Cant1</b>    | 0.97714 | 5.00E-05 | 0.00032 | 0.77276 | 0.0128   | 0.04148 |
| <b>Exosc10</b>  | 0.97597 | 2.00E-04 | 0.00111 | 0.9766  | 0.00395  | 0.01606 |
| <b>Al607873</b> | 0.97591 | 0.0028   | 0.01059 | 1.11691 | 0.0062   | 0.02306 |
| <b>Sap18</b>    | 0.97519 | 5.00E-04 | 0.00244 | 1.10612 | 0.0028   | 0.01205 |
| <b>Ii17ra</b>   | 0.9747  | 0.0085   | 0.02666 | 2.18318 | 5.00E-05 | 0.00038 |
| <b>Elf4</b>     | 0.96989 | 0.0012   | 0.00518 | 0.88973 | 0.00745  | 0.02687 |
| <b>Nolc1</b>    | 0.9693  | 5.00E-05 | 0.00032 | 0.7964  | 0.0088   | 0.03076 |
| <b>Cdk9</b>     | 0.96814 | 0.00035  | 0.00181 | 1.27339 | 3.00E-04 | 0.00184 |
| <b>Tinagl1</b>  | 0.96787 | 5.00E-04 | 0.00244 | 1.96383 | 5.00E-05 | 0.00038 |
| <b>Pnn</b>      | 0.96767 | 5.00E-05 | 0.00032 | 0.93512 | 0.00205  | 0.00937 |
| <b>Afg3l2</b>   | 0.96691 | 5.00E-05 | 0.00032 | 1.26369 | 0.00015  | 0.00102 |
| <b>Zfp282</b>   | 0.9665  | 1.00E-04 | 0.0006  | 0.91455 | 0.0053   | 0.02027 |
| <b>Ypel3</b>    | 0.96507 | 0.0044   | 0.01543 | 1.45476 | 5.00E-05 | 0.00038 |
| <b>Ccdc90a</b>  | 0.96327 | 5.00E-05 | 0.00032 | 0.90455 | 0.00335  | 0.01398 |
| <b>Xdh</b>      | 0.96291 | 5.00E-05 | 0.00032 | 1.47434 | 5.00E-05 | 0.00038 |
| <b>Ddx59</b>    | 0.96272 | 0.00015  | 0.00086 | 1.05548 | 0.00115  | 0.00578 |
| <b>Rev3l</b>    | 0.96234 | 0.01105  | 0.03297 | 1.26713 | 0.00935  | 0.03236 |
| <b>Btf3</b>     | 0.96227 | 5.00E-05 | 0.00032 | 1.05163 | 0.00495  | 0.01919 |
| <b>Klf6</b>     | 0.96214 | 5.00E-05 | 0.00032 | 1.37495 | 5.00E-05 | 0.00038 |
| <b>Ap2b1</b>    | 0.95821 | 5.00E-05 | 0.00032 | 0.88239 | 0.01455  | 0.04583 |
| <b>Las1l</b>    | 0.95812 | 0.00215  | 0.00849 | 1.36021 | 0.0067   | 0.02457 |
| <b>Wdr74</b>    | 0.95757 | 0.00025  | 0.00135 | 1.07836 | 0.00095  | 0.00492 |
| <b>Hbp1</b>     | 0.95704 | 5.00E-05 | 0.00032 | 0.80167 | 0.0138   | 0.04415 |
| <b>Phip</b>     | 0.95553 | 5.00E-05 | 0.00032 | 0.90442 | 0.0032   | 0.01343 |
| <b>Slc7a2</b>   | 0.95363 | 5.00E-05 | 0.00032 | 1.44489 | 7.00E-04 | 0.00383 |
| <b>Srrm1</b>    | 0.95343 | 0.00135  | 0.00572 | 1.14485 | 0.00205  | 0.00937 |
| <b>Abcf1</b>    | 0.95339 | 0.00045  | 0.00224 | 1.03614 | 0.00285  | 0.01222 |
| <b>Ercc4</b>    | 0.95239 | 0.0013   | 0.00554 | 0.89221 | 0.00835  | 0.02947 |
| <b>Gga1</b>     | 0.95224 | 5.00E-05 | 0.00032 | 0.99867 | 0.0027   | 0.01168 |
| <b>Rft1</b>     | 0.9516  | 0.00045  | 0.00224 | 1.14716 | 0.00075  | 0.00405 |
| <b>Gm505</b>    | 0.95064 | 9.00E-04 | 0.00406 | 0.85107 | 0.01325  | 0.04272 |
| <b>Ttc1</b>     | 0.9504  | 5.00E-05 | 0.00032 | 0.97227 | 0.00195  | 0.00898 |
| <b>Tacc1</b>    | 0.94839 | 5.00E-05 | 0.00032 | 0.89409 | 0.0037   | 0.01519 |

|                      |         |          |         |         |          |         |
|----------------------|---------|----------|---------|---------|----------|---------|
| <b>2400003C14Rik</b> | 0.94799 | 5.00E-05 | 0.00032 | 0.78144 | 0.01385  | 0.04424 |
| <b>Cggbp1</b>        | 0.94658 | 0.0029   | 0.0109  | 1.1502  | 0.0058   | 0.02182 |
| <b>Hspbap1</b>       | 0.94605 | 0.007    | 0.02273 | 1.42994 | 0.00015  | 0.00102 |
| <b>Thpp2</b>         | 0.94365 | 5.00E-05 | 0.00032 | 1.04884 | 0.00125  | 0.00621 |
| <b>Cep110</b>        | 0.94357 | 0.016    | 0.04467 | 1.77906 | 5.00E-05 | 0.00038 |
| <b>Fzd4</b>          | 0.94353 | 5.00E-05 | 0.00032 | 1.1453  | 0.00085  | 0.00449 |
| <b>Zdhhc24</b>       | 0.94139 | 0.01075  | 0.03222 | 1.39482 | 0.0015   | 0.00723 |
| <b>Cd2bp2</b>        | 0.94111 | 5.00E-05 | 0.00032 | 1.19465 | 3.00E-04 | 0.00184 |
| <b>Clk2</b>          | 0.94075 | 0.00705  | 0.02283 | 1.2476  | 0.00245  | 0.01083 |
| <b>Hook2</b>         | 0.94001 | 0.00385  | 0.01375 | 2.26241 | 5.00E-05 | 0.00038 |
| <b>Nrtn</b>          | 0.93991 | 0.01655  | 0.04591 | 1.48933 | 3.00E-04 | 0.00184 |
| <b>Camta1</b>        | 0.93978 | 0.00435  | 0.01528 | 1.15442 | 0.0117   | 0.03861 |
| <b>BC013529</b>      | 0.93968 | 5.00E-05 | 0.00032 | 0.80871 | 0.0127   | 0.04123 |
| <b>Rb1cc1</b>        | 0.93959 | 0.00105  | 0.00462 | 1.28269 | 0.00485  | 0.01888 |
| <b>Brd1</b>          | 0.93956 | 7.00E-04 | 0.00328 | 1.19341 | 0.00095  | 0.00492 |
| <b>Pik3cb</b>        | 0.93924 | 1.00E-04 | 0.0006  | 3.14138 | 5.00E-05 | 0.00038 |
| <b>Ubxn6</b>         | 0.93666 | 0.001    | 0.00445 | 1.33241 | 0.0027   | 0.01168 |
| <b>Hdlbp</b>         | 0.93586 | 5.00E-05 | 0.00032 | 1.23164 | 0.0042   | 0.01681 |
| <b>Tmem183a</b>      | 0.93553 | 5.00E-05 | 0.00032 | 1.13748 | 5.00E-04 | 0.00287 |
| <b>Tomm40</b>        | 0.93347 | 5.00E-05 | 0.00032 | 0.93326 | 0.00405  | 0.01634 |
| <b>Rps9</b>          | 0.9334  | 5.00E-05 | 0.00032 | 1.3896  | 5.00E-05 | 0.00038 |
| <b>Wdr53</b>         | 0.9328  | 0.004    | 0.01419 | 1.04353 | 0.0045   | 0.01782 |
| <b>Prkcd</b>         | 0.93278 | 0.0044   | 0.01543 | 2.04417 | 5.00E-05 | 0.00038 |
| <b>Ddx52</b>         | 0.92983 | 0.0012   | 0.00518 | 0.94351 | 0.0042   | 0.01681 |
| <b>Usp53</b>         | 0.92874 | 0.00145  | 0.0061  | 1.23757 | 0.00015  | 0.00102 |
| <b>Mbd6</b>          | 0.92838 | 4.00E-04 | 0.00203 | 0.97288 | 0.00335  | 0.01398 |
| <b>Gmeb1</b>         | 0.92661 | 5.00E-05 | 0.00032 | 0.96463 | 0.00215  | 0.00974 |
| <b>Tgfbr3</b>        | 0.92654 | 1.00E-04 | 0.0006  | 0.94973 | 0.0019   | 0.0088  |
| <b>Efh2</b>          | 0.92611 | 0.0012   | 0.00518 | 1.88691 | 5.00E-05 | 0.00038 |
| <b>Pstpip2</b>       | 0.92577 | 5.00E-05 | 0.00032 | 0.82067 | 0.0082   | 0.02904 |
| <b>Zc3h10</b>        | 0.9252  | 0.0157   | 0.04398 | 1.11637 | 0.00545  | 0.02072 |
| <b>Zfp524</b>        | 0.92156 | 0.002    | 0.00799 | 1.86508 | 5.00E-05 | 0.00038 |
| <b>4831426I19Rik</b> | 0.92038 | 0.0052   | 0.01776 | 1.62657 | 5.00E-05 | 0.00038 |
| <b>Fmo1</b>          | 0.91838 | 0.0021   | 0.00833 | 1.49743 | 0.00015  | 0.00102 |
| <b>Ankrd17</b>       | 0.91813 | 5.00E-05 | 0.00032 | 0.7464  | 0.0159   | 0.04919 |
| <b>Lin52</b>         | 0.91572 | 1.00E-04 | 0.0006  | 0.96358 | 0.0028   | 0.01205 |
| <b>Rnh1</b>          | 0.91536 | 5.00E-05 | 0.00032 | 1.73845 | 5.00E-05 | 0.00038 |
| <b>Srsf5</b>         | 0.91513 | 2.00E-04 | 0.00111 | 1.14496 | 0.00305  | 0.01292 |
| <b>Emd</b>           | 0.9149  | 1.00E-04 | 0.0006  | 1.71329 | 5.00E-05 | 0.00038 |
| <b>Clptm1</b>        | 0.91469 | 5.00E-05 | 0.00032 | 1.01164 | 0.0025   | 0.011   |
| <b>Fam50a</b>        | 0.91394 | 0.00015  | 0.00086 | 1.7427  | 5.00E-05 | 0.00038 |

|                      |         |          |         |         |          |         |
|----------------------|---------|----------|---------|---------|----------|---------|
| <b>Slc27a1</b>       | 0.91393 | 5.00E-05 | 0.00032 | 0.76668 | 0.01525  | 0.04762 |
| <b>Bag6</b>          | 0.91298 | 6.00E-04 | 0.00286 | 0.87152 | 0.01075  | 0.03609 |
| <b>Nemf</b>          | 0.91249 | 1.00E-04 | 0.0006  | 0.82034 | 0.0073   | 0.02642 |
| <b>Mtap7</b>         | 0.91194 | 0.00285  | 0.01076 | 2.29214 | 5.00E-05 | 0.00038 |
| <b>Pcyt2</b>         | 0.91081 | 0.00115  | 0.005   | 1.65332 | 5.00E-05 | 0.00038 |
| <b>0610007L01Rik</b> | 0.90971 | 3.00E-04 | 0.00158 | 0.93897 | 0.0111   | 0.03702 |
| <b>Med25</b>         | 0.90901 | 5.00E-05 | 0.00032 | 1.02389 | 0.0013   | 0.00641 |
| <b>Sptlc1</b>        | 0.90817 | 5.00E-05 | 0.00032 | 0.91432 | 0.00295  | 0.01259 |
| <b>Aldh6a1</b>       | 0.90745 | 5.00E-05 | 0.00032 | 0.89687 | 0.0128   | 0.04148 |
| <b>Nfkb2</b>         | 0.90544 | 0.00055  | 0.00266 | 1.701   | 5.00E-05 | 0.00038 |
| <b>Slc38a2</b>       | 0.90388 | 5.00E-05 | 0.00032 | 1.04325 | 0.002    | 0.00918 |
| <b>Ccpg1</b>         | 0.90262 | 8.00E-04 | 0.00368 | 1.40661 | 0.00055  | 0.00312 |
| <b>Maml1</b>         | 0.90229 | 3.00E-04 | 0.00158 | 0.81542 | 0.0121   | 0.03962 |
| <b>S100pbb</b>       | 0.90178 | 0.0019   | 0.00766 | 1.56118 | 5.00E-05 | 0.00038 |
| <b>Abcc4</b>         | 0.89822 | 5.00E-05 | 0.00032 | 1.08253 | 4.00E-04 | 0.00237 |
| <b>Eif5b</b>         | 0.89737 | 5.00E-05 | 0.00032 | 1.44625 | 0.00025  | 0.00159 |
| <b>Tpd52l2</b>       | 0.89682 | 6.00E-04 | 0.00286 | 1.15096 | 0.0018   | 0.00842 |
| <b>Rab4b</b>         | 0.89357 | 0.01395  | 0.03991 | 1.00673 | 0.00835  | 0.02947 |
| <b>Abcf2</b>         | 0.89299 | 5.00E-05 | 0.00032 | 0.84525 | 0.0144   | 0.04556 |
| <b>Rxrb</b>          | 0.89121 | 5.00E-05 | 0.00032 | 1.00839 | 0.0012   | 0.006   |
| <b>Zfp639</b>        | 0.8908  | 1.00E-04 | 0.0006  | 0.99273 | 0.00135  | 0.00662 |
| <b>Phkg2</b>         | 0.88933 | 0.0098   | 0.02992 | 1.18763 | 0.0056   | 0.0212  |
| <b>Pik3ca</b>        | 0.88924 | 5.00E-05 | 0.00032 | 1.00455 | 0.0066   | 0.02427 |
| <b>1810063B07Rik</b> | 0.88775 | 0.0018   | 0.00733 | 0.86967 | 0.0102   | 0.03456 |
| <b>Zfp212</b>        | 0.88648 | 7.00E-04 | 0.00328 | 0.94597 | 0.00275  | 0.01187 |
| <b>Napepld</b>       | 0.88634 | 0.00025  | 0.00135 | -1.1687 | 2.00E-04 | 0.00131 |
| <b>Dazap1</b>        | 0.8863  | 0.0022   | 0.00865 | 1.01473 | 0.00895  | 0.03119 |
| <b>Senp6</b>         | 0.88586 | 0.0177   | 0.04841 | 1.44726 | 0.0032   | 0.01343 |
| <b>Mdm4-ps</b>       | 0.8848  | 0.0016   | 0.00663 | 0.92039 | 0.0079   | 0.0282  |
| <b>Dcxr</b>          | 0.88471 | 0.00325  | 0.01196 | 1.92825 | 5.00E-05 | 0.00038 |
| <b>Ptpn1</b>         | 0.88345 | 0.00015  | 0.00086 | 0.80431 | 0.01515  | 0.04737 |
| <b>Slc43a3</b>       | 0.88177 | 2.00E-04 | 0.00111 | 1.52766 | 5.00E-05 | 0.00038 |
| <b>Gltscr2</b>       | 0.88018 | 5.00E-05 | 0.00032 | 1.24088 | 1.00E-04 | 0.00072 |
| <b>Snrnp200</b>      | 0.87871 | 0.0035   | 0.01272 | 1.08816 | 0.00335  | 0.01398 |
| <b>Sltm</b>          | 0.87813 | 1.00E-04 | 0.0006  | 1.25273 | 5.00E-05 | 0.00038 |
| <b>Ino80</b>         | 0.87756 | 0.00395  | 0.01405 | 1.28439 | 2.00E-04 | 0.00131 |
| <b>Eif3m</b>         | 0.87618 | 0.00025  | 0.00135 | 0.84762 | 0.0103   | 0.03481 |
| <b>Rplp2</b>         | 0.87605 | 5.00E-05 | 0.00032 | 1.47362 | 0.00035  | 0.00212 |
| <b>Zfp422</b>        | 0.87535 | 6.00E-04 | 0.00286 | 0.83537 | 0.00925  | 0.03206 |
| <b>Cyp2d22</b>       | 0.87466 | 1.00E-04 | 0.0006  | 0.83962 | 0.00785  | 0.02805 |
| <b>Gm15487</b>       | 0.87457 | 2.00E-04 | 0.00111 | 1.01866 | 0.00145  | 0.00702 |

|                    |         |          |         |         |          |         |
|--------------------|---------|----------|---------|---------|----------|---------|
| <b>Gadd45b</b>     | 0.8741  | 5.00E-05 | 0.00032 | 1.60719 | 5.00E-05 | 0.00038 |
| <b>Xbp1</b>        | 0.87409 | 5.00E-05 | 0.00032 | 1.44677 | 0.00015  | 0.00102 |
| <b>Ddx42</b>       | 0.87283 | 0.00015  | 0.00086 | 0.85026 | 0.00505  | 0.01952 |
| <b>Atp6v0c</b>     | 0.87175 | 5.00E-05 | 0.00032 | 0.90382 | 0.0068   | 0.0249  |
| <b>Fam102b</b>     | 0.87163 | 0.00015  | 0.00086 | 0.79091 | 0.0118   | 0.03888 |
| <b>Wdr26</b>       | 0.87117 | 0.00215  | 0.00849 | 1.13229 | 0.0095   | 0.03279 |
| <b>Brd8</b>        | 0.86845 | 2.00E-04 | 0.00111 | 1.04343 | 0.00065  | 0.00359 |
| <b>Etf1</b>        | 0.86791 | 5.00E-05 | 0.00032 | 0.8617  | 0.013    | 0.04201 |
| <b>Myst1</b>       | 0.86762 | 3.00E-04 | 0.00158 | 1.34609 | 5.00E-05 | 0.00038 |
| <b>Rras</b>        | 0.86545 | 5.00E-04 | 0.00244 | 0.78314 | 0.0117   | 0.03861 |
| <b>Xpo5</b>        | 0.86457 | 3.00E-04 | 0.00158 | 0.876   | 0.00475  | 0.0186  |
| <b>Plcb4</b>       | 0.86421 | 3.00E-04 | 0.00158 | 0.82138 | 0.0116   | 0.03839 |
| <b>Rps14</b>       | 0.86366 | 5.00E-05 | 0.00032 | 1.21279 | 0.001    | 0.00513 |
| <b>Eif3l</b>       | 0.85935 | 5.00E-05 | 0.00032 | 0.88875 | 0.00545  | 0.02072 |
| <b>Lsg1</b>        | 0.85928 | 0.0066   | 0.02167 | 1.00304 | 0.0149   | 0.04671 |
| <b>Stx5a</b>       | 0.8579  | 0.0015   | 0.00627 | 0.84868 | 0.01335  | 0.04295 |
| <b>Sympk</b>       | 0.85662 | 0.002    | 0.00799 | 0.99693 | 0.01405  | 0.04467 |
| <b>Rps20</b>       | 0.8562  | 0.00015  | 0.00086 | 1.46986 | 3.00E-04 | 0.00184 |
| <b>Fbxw8</b>       | 0.85315 | 0.00015  | 0.00086 | 1.04537 | 0.0013   | 0.00641 |
| <b>Nsmce2</b>      | 0.85267 | 0.0012   | 0.00518 | 0.94683 | 0.0048   | 0.01873 |
| <b>Ldlr</b>        | 0.85028 | 0.00025  | 0.00135 | -1.1912 | 8.00E-04 | 0.00427 |
| <b>Cds2</b>        | 0.84876 | 1.00E-04 | 0.0006  | 1.1024  | 7.00E-04 | 0.00383 |
| <b>Wac</b>         | 0.84866 | 0.0164   | 0.04557 | 0.88994 | 0.0155   | 0.04817 |
| <b>Map4k4</b>      | 0.84771 | 0.00015  | 0.00086 | 0.99577 | 0.00135  | 0.00662 |
| <b>Wbp11</b>       | 0.84588 | 0.00465  | 0.01614 | 1.01559 | 0.00165  | 0.00782 |
| <b>Erlec1</b>      | 0.84514 | 0.00065  | 0.00308 | 0.89885 | 0.0111   | 0.03702 |
| <b>D19Bwg1357e</b> | 0.84344 | 8.00E-04 | 0.00368 | 0.78271 | 0.01215  | 0.03973 |
| <b>Rpl18a</b>      | 0.84318 | 5.00E-05 | 0.00032 | 1.29904 | 6.00E-04 | 0.00335 |
| <b>Ypel2</b>       | 0.84057 | 0.00165  | 0.00681 | 0.86633 | 0.00615  | 0.02292 |
| <b>Map1lc3a</b>    | 0.83959 | 0.00075  | 0.00349 | 1.36001 | 0.0012   | 0.006   |
| <b>Slco3a1</b>     | 0.83839 | 5.00E-05 | 0.00032 | 0.86108 | 0.01385  | 0.04424 |
| <b>Rnf13</b>       | 0.83827 | 1.00E-04 | 0.0006  | 1.31694 | 5.00E-05 | 0.00038 |
| <b>Snrpb2</b>      | 0.83806 | 0.00845  | 0.02651 | 1.06716 | 0.00905  | 0.03147 |
| <b>Ptpn23</b>      | 0.83799 | 6.00E-04 | 0.00286 | 1.29331 | 5.00E-05 | 0.00038 |
| <b>Tmem222</b>     | 0.83707 | 7.00E-04 | 0.00328 | 0.9723  | 0.0018   | 0.00842 |
| <b>Rps28</b>       | 0.83657 | 0.00545  | 0.01845 | 1.66179 | 0.00055  | 0.00312 |
| <b>Cyb561</b>      | 0.83586 | 0.00705  | 0.02283 | 1.22619 | 5.00E-04 | 0.00287 |
| <b>Abca5</b>       | 0.83511 | 4.00E-04 | 0.00203 | 1.09447 | 0.00045  | 0.00262 |
| <b>Wdr11</b>       | 0.83288 | 0.0025   | 0.00962 | 0.9802  | 0.0042   | 0.01681 |
| <b>Arpc3</b>       | 0.83194 | 3.00E-04 | 0.00158 | 1.09174 | 2.00E-04 | 0.00131 |
| <b>Zfp746</b>      | 0.83052 | 0.00065  | 0.00308 | 0.97593 | 0.0022   | 0.00992 |

|                      |         |          |         |         |          |         |
|----------------------|---------|----------|---------|---------|----------|---------|
| <b>Fam160b1</b>      | 0.83045 | 3.00E-04 | 0.00158 | 0.90773 | 0.00515  | 0.01983 |
| <b>2610301B20Rik</b> | 0.82933 | 0.00945  | 0.0291  | 2.46652 | 5.00E-05 | 0.00038 |
| <b>Psen1</b>         | 0.82933 | 1.00E-04 | 0.0006  | 1.07476 | 0.00035  | 0.00212 |
| <b>Dock8</b>         | 0.82925 | 0.0163   | 0.04537 | 1.77713 | 5.00E-05 | 0.00038 |
| <b>Ubn2</b>          | 0.82909 | 4.00E-04 | 0.00203 | 0.90015 | 0.01175  | 0.03874 |
| <b>Rell1</b>         | 0.82904 | 3.00E-04 | 0.00158 | 0.84668 | 0.00785  | 0.02805 |
| <b>Eef2</b>          | 0.82876 | 0.00035  | 0.00181 | 1.57501 | 0.0014   | 0.00681 |
| <b>Xpc</b>           | 0.82875 | 4.00E-04 | 0.00203 | 1.36781 | 5.00E-05 | 0.00038 |
| <b>Pex14</b>         | 0.82867 | 0.00025  | 0.00135 | 1.16238 | 0.00015  | 0.00102 |
| <b>Trpc4ap</b>       | 0.82804 | 2.00E-04 | 0.00111 | 0.93884 | 0.00705  | 0.02568 |
| <b>Whsc111</b>       | 0.82584 | 0.00345  | 0.01257 | 1.2376  | 0.00075  | 0.00405 |
| <b>Mll1</b>          | 0.82463 | 6.00E-04 | 0.00286 | 0.76287 | 0.0153   | 0.04768 |
| <b>Dhx38</b>         | 0.82407 | 5.00E-05 | 0.00032 | 0.86748 | 0.0046   | 0.01814 |
| <b>Rrp15</b>         | 0.82388 | 0.00275  | 0.01043 | 0.92294 | 0.00585  | 0.02197 |
| <b>Mttp</b>          | 0.82352 | 0.0033   | 0.01213 | -1.3065 | 3.00E-04 | 0.00184 |
| <b>Bax</b>           | 0.82323 | 0.00255  | 0.00979 | 0.87057 | 0.00685  | 0.02504 |
| <b>Rpl27a</b>        | 0.82162 | 0.00205  | 0.00814 | 1.25547 | 0.001    | 0.00513 |
| <b>Snrpa1</b>        | 0.82159 | 0.00105  | 0.00462 | 0.97851 | 0.0019   | 0.0088  |
| <b>Fam103a1</b>      | 0.82124 | 0.00105  | 0.00462 | 0.82188 | 0.01     | 0.0341  |
| <b>Rnf40</b>         | 0.82108 | 1.00E-04 | 0.0006  | 1.12745 | 4.00E-04 | 0.00237 |
| <b>Tjp2</b>          | 0.82043 | 0.006    | 0.02002 | 1.23261 | 5.00E-04 | 0.00287 |
| <b>Ngrn</b>          | 0.82024 | 1.00E-04 | 0.0006  | 0.96107 | 0.00195  | 0.00898 |
| <b>Dgat1</b>         | 0.82021 | 0.01415  | 0.04037 | 1.16748 | 0.0035   | 0.01447 |
| <b>Ogfr</b>          | 0.81844 | 0.00315  | 0.01165 | 0.82223 | 0.00985  | 0.03368 |
| <b>Tmem106b</b>      | 0.81832 | 5.00E-05 | 0.00032 | 1.14717 | 0.00365  | 0.01502 |
| <b>Ppp1r12a</b>      | 0.81712 | 9.00E-04 | 0.00406 | 1.20665 | 2.00E-04 | 0.00131 |
| <b>Atxn2l</b>        | 0.81693 | 1.00E-04 | 0.0006  | 0.80915 | 0.0097   | 0.03333 |
| <b>Ccni</b>          | 0.81679 | 0.00025  | 0.00135 | 1.40023 | 5.00E-05 | 0.00038 |
| <b>Fcho2</b>         | 0.81589 | 2.00E-04 | 0.00111 | 1.03261 | 0.00135  | 0.00662 |
| <b>Ilkap</b>         | 0.81515 | 0.00045  | 0.00224 | 1.16665 | 1.00E-04 | 0.00072 |
| <b>D15Ert621e</b>    | 0.81477 | 0.00155  | 0.00645 | 0.86258 | 0.0061   | 0.02276 |
| <b>Nrbp2</b>         | 0.81359 | 9.00E-04 | 0.00406 | 1.32188 | 5.00E-05 | 0.00038 |
| <b>Mier3</b>         | 0.81357 | 0.0013   | 0.00554 | 0.78698 | 0.01065  | 0.03584 |
| <b>Rpl36</b>         | 0.81315 | 0.00015  | 0.00086 | 1.31731 | 3.00E-04 | 0.00184 |
| <b>Rpl19</b>         | 0.81226 | 0.0063   | 0.02089 | 1.23141 | 0.016    | 0.04944 |
| <b>Evi5</b>          | 0.81195 | 0.00175  | 0.00715 | 1.19445 | 3.00E-04 | 0.00184 |
| <b>Ppp1r13b</b>      | 0.81089 | 0.00535  | 0.01818 | 1.08241 | 0.00065  | 0.00359 |
| <b>Avl9</b>          | 0.80891 | 0.00595  | 0.01987 | 0.9523  | 0.003    | 0.01275 |
| <b>Prr24</b>         | 0.80694 | 0.0017   | 0.00699 | 1.48088 | 5.00E-05 | 0.00038 |
| <b>Fam133b</b>       | 0.80682 | 0.00235  | 0.00914 | 1.55714 | 5.00E-05 | 0.00038 |
| <b>Nup50</b>         | 0.80539 | 0.0018   | 0.00733 | 0.95632 | 0.003    | 0.01275 |

|                      |         |          |         |         |          |         |
|----------------------|---------|----------|---------|---------|----------|---------|
| <b>1600002K03Rik</b> | 0.80497 | 0.0094   | 0.02898 | 1.25285 | 6.00E-04 | 0.00335 |
| <b>Esrrb</b>         | 0.80441 | 0.0024   | 0.00929 | 1.47775 | 5.00E-05 | 0.00038 |
| <b>Usp28</b>         | 0.80256 | 5.00E-05 | 0.00032 | 1.73171 | 0.00025  | 0.00159 |
| <b>P2rx5</b>         | 0.80247 | 0.00985  | 0.03005 | -0.827  | 0.015    | 0.04696 |
| <b>Itpk1</b>         | 0.8023  | 0.0028   | 0.01059 | 1.63358 | 5.00E-05 | 0.00038 |
| <b>Rnf38</b>         | 0.80216 | 8.00E-04 | 0.00368 | 0.89752 | 0.00225  | 0.0101  |
| <b>2510003E04Rik</b> | 0.80176 | 5.00E-04 | 0.00244 | 0.7992  | 0.0123   | 0.04018 |
| <b>Sf3b2</b>         | 0.80099 | 5.00E-05 | 0.00032 | 1.13467 | 0.00175  | 0.00822 |
| <b>Gata2</b>         | 0.80065 | 0.00195  | 0.00782 | 1.47403 | 5.00E-05 | 0.00038 |
| <b>Ddx50</b>         | 0.79944 | 1.00E-04 | 0.0006  | 1.03323 | 0.001    | 0.00513 |
| <b>Entpd1</b>        | 0.79844 | 0.01785  | 0.04872 | 0.8595  | 0.00855  | 0.02999 |
| <b>Siva1</b>         | 0.79787 | 0.0033   | 0.01213 | 1.00427 | 0.00165  | 0.00782 |
| <b>Rnf185</b>        | 0.79746 | 0.00035  | 0.00181 | 0.87528 | 0.0036   | 0.01484 |
| <b>Csnk1e</b>        | 0.79716 | 0.00515  | 0.01761 | 1.55007 | 5.00E-05 | 0.00038 |
| <b>Atp6v1c1</b>      | 0.79703 | 4.00E-04 | 0.00203 | 0.92154 | 0.0026   | 0.01132 |
| <b>Usp36</b>         | 0.7968  | 0.0028   | 0.01059 | 1.25985 | 2.00E-04 | 0.00131 |
| <b>Pus1</b>          | 0.79596 | 0.0021   | 0.00833 | 0.81498 | 0.0132   | 0.04258 |
| <b>Gatsl3</b>        | 0.79562 | 0.01515  | 0.04273 | 1.12941 | 0.0035   | 0.01447 |
| <b>Cdk13</b>         | 0.79513 | 0.00055  | 0.00266 | 0.99132 | 0.00155  | 0.00742 |
| <b>Sbf2</b>          | 0.79389 | 0.00365  | 0.01315 | 1.03976 | 0.0038   | 0.01556 |
| <b>4632411B12Rik</b> | 0.79243 | 0.00015  | 0.00086 | 1.23014 | 0.00035  | 0.00212 |
| <b>Nfkbiz</b>        | 0.79203 | 0.0178   | 0.04862 | 1.63078 | 1.00E-04 | 0.00072 |
| <b>Nampt</b>         | 0.79064 | 0.00015  | 0.00086 | 1.31918 | 6.00E-04 | 0.00335 |
| <b>Parp4</b>         | 0.79033 | 0.01705  | 0.04696 | 2.25427 | 5.00E-05 | 0.00038 |
| <b>Phf23</b>         | 0.78919 | 0.0095   | 0.02923 | 0.81355 | 0.0126   | 0.04097 |
| <b>Kdm3b</b>         | 0.78823 | 0.00065  | 0.00308 | 0.91132 | 0.004    | 0.01623 |
| <b>Phf1</b>          | 0.78743 | 0.00085  | 0.00387 | 0.85206 | 0.00475  | 0.0186  |
| <b>Rasip1</b>        | 0.78723 | 0.003    | 0.01117 | 1.07736 | 0.00105  | 0.00534 |
| <b>Myl3</b>          | 0.78652 | 0.01055  | 0.0318  | -1.7717 | 5.00E-05 | 0.00038 |
| <b>Txnip</b>         | 0.78628 | 0.00315  | 0.01165 | 2.20961 | 1.00E-04 | 0.00072 |
| <b>Zdhhc20</b>       | 0.78597 | 0.00225  | 0.00883 | 0.80768 | 0.0139   | 0.04433 |
| <b>Cyp20a1</b>       | 0.78535 | 0.00505  | 0.01733 | 1.39347 | 5.00E-05 | 0.00038 |
| <b>Arglu1</b>        | 0.78454 | 6.00E-04 | 0.00286 | 1.00273 | 0.00215  | 0.00974 |
| <b>Yipf3</b>         | 0.78451 | 0.00355  | 0.01288 | 1.1773  | 0.0022   | 0.00992 |
| <b>Brpf1</b>         | 0.78437 | 0.0077   | 0.02458 | 0.90736 | 0.0079   | 0.0282  |
| <b>Aup1</b>          | 0.78398 | 0.00095  | 0.00425 | 0.88076 | 0.01485  | 0.04659 |
| <b>Zfp715</b>        | 0.78392 | 9.00E-04 | 0.00406 | 0.7998  | 0.00755  | 0.02715 |
| <b>Fam100a</b>       | 0.78259 | 0.00035  | 0.00181 | 1.49685 | 5.00E-05 | 0.00038 |
| <b>Zfp358</b>        | 0.78002 | 6.00E-04 | 0.00286 | 0.88698 | 0.00475  | 0.0186  |
| <b>Fbxl20</b>        | 0.77971 | 0.0036   | 0.01302 | 1.158   | 0.00035  | 0.00212 |
| <b>Mon2</b>          | 0.7786  | 0.00025  | 0.00135 | 1.17614 | 0.00025  | 0.00159 |



|                 |         |          |         |         |          |         |
|-----------------|---------|----------|---------|---------|----------|---------|
| <b>Sncaip</b>   | 0.77854 | 0.01305  | 0.03783 | 0.99792 | 0.00395  | 0.01606 |
| <b>Uimc1</b>    | 0.77709 | 0.00935  | 0.02885 | 0.88385 | 0.0134   | 0.04309 |
| <b>Tgoln1</b>   | 0.77544 | 0.00035  | 0.00181 | 0.81679 | 0.0101   | 0.03434 |
| <b>Cd63</b>     | 0.77539 | 1.00E-04 | 0.0006  | 1.02021 | 0.00295  | 0.01259 |
| <b>Utp15</b>    | 0.77536 | 0.00355  | 0.01288 | 0.8724  | 0.008    | 0.02849 |
| <b>Lemd3</b>    | 0.77437 | 0.00125  | 0.00536 | 0.85735 | 0.007    | 0.02553 |
| <b>Zfp410</b>   | 0.77394 | 8.00E-04 | 0.00368 | 1.1207  | 7.00E-04 | 0.00383 |
| <b>Rpl10a</b>   | 0.77373 | 4.00E-04 | 0.00203 | 1.38369 | 5.00E-05 | 0.00038 |
| <b>Rif1</b>     | 0.77286 | 0.00215  | 0.00849 | 1.09327 | 0.00105  | 0.00534 |
| <b>Foxn2</b>    | 0.77268 | 3.00E-04 | 0.00158 | 0.88094 | 0.00345  | 0.01434 |
| <b>Tns3</b>     | 0.77264 | 0.01635  | 0.04547 | 1.11127 | 0.00075  | 0.00405 |
| <b>Nhlrc2</b>   | 0.76955 | 0.01165  | 0.03449 | 0.98793 | 0.00545  | 0.02072 |
| <b>Ppp4c</b>    | 0.76936 | 0.0022   | 0.00865 | 0.97018 | 0.0017   | 0.00803 |
| <b>Prrc2c</b>   | 0.76601 | 0.00055  | 0.00266 | 0.7678  | 0.0147   | 0.04624 |
| <b>Rpl4</b>     | 0.76523 | 1.00E-04 | 0.0006  | 1.10957 | 0.0084   | 0.0296  |
| <b>Ing2</b>     | 0.7648  | 0.0117   | 0.03462 | 1.45898 | 3.00E-04 | 0.00184 |
| <b>Ppp1r9b</b>  | 0.76477 | 0.00105  | 0.00462 | 0.77278 | 0.0132   | 0.04258 |
| <b>Anp32a</b>   | 0.76399 | 0.0086   | 0.02689 | 1.6976  | 0.00055  | 0.00312 |
| <b>Mylip</b>    | 0.76298 | 6.00E-04 | 0.00286 | 2.17636 | 5.00E-05 | 0.00038 |
| <b>Puf60</b>    | 0.76234 | 3.00E-04 | 0.00158 | 0.75494 | 0.0143   | 0.04528 |
| <b>Nfat5</b>    | 0.75997 | 2.00E-04 | 0.00111 | 1.35222 | 5.00E-05 | 0.00038 |
| <b>Ubtf</b>     | 0.7594  | 0.00045  | 0.00224 | 1.361   | 5.00E-05 | 0.00038 |
| <b>Gm11361</b>  | 0.75755 | 0.00135  | 0.00572 | 1.32244 | 5.00E-05 | 0.00038 |
| <b>C1qbp</b>    | 0.75721 | 0.00055  | 0.00266 | 0.84107 | 0.0153   | 0.04768 |
| <b>Zfml</b>     | 0.75672 | 0.00035  | 0.00181 | 0.99872 | 0.00155  | 0.00742 |
| <b>Rps19</b>    | 0.75661 | 0.00035  | 0.00181 | 1.27597 | 0.00015  | 0.00102 |
| <b>Eif1a</b>    | 0.75658 | 0.00215  | 0.00849 | 0.8188  | 0.01045  | 0.03523 |
| <b>Txnrd3</b>   | 0.75278 | 0.0071   | 0.02297 | 1.22233 | 0.00045  | 0.00262 |
| <b>Ppfia1</b>   | 0.7524  | 0.00485  | 0.01675 | 1.17005 | 0.0017   | 0.00803 |
| <b>Ctnna1</b>   | 0.75085 | 2.00E-04 | 0.00111 | 1.85785 | 5.00E-05 | 0.00038 |
| <b>Rnf19a</b>   | 0.75084 | 0.00065  | 0.00308 | 0.82128 | 0.0073   | 0.02642 |
| <b>Lrch1</b>    | 0.75055 | 0.01275  | 0.03713 | 1.13206 | 0.00235  | 0.01046 |
| <b>Spcs3</b>    | 0.74864 | 0.00045  | 0.00224 | 1.29589 | 5.00E-05 | 0.00038 |
| <b>Gm10260</b>  | 0.74804 | 5.00E-04 | 0.00244 | 1.05831 | 0.00065  | 0.00359 |
| <b>Tysnd1</b>   | 0.74757 | 0.0021   | 0.00833 | 0.96932 | 0.00265  | 0.01149 |
| <b>Eif4a3</b>   | 0.74741 | 0.01395  | 0.03991 | 1.04936 | 0.01405  | 0.04467 |
| <b>Nob1</b>     | 0.74708 | 0.00095  | 0.00425 | 0.87232 | 0.0089   | 0.03106 |
| <b>Tfip11</b>   | 0.74622 | 0.00195  | 0.00782 | 0.89424 | 0.0059   | 0.02212 |
| <b>Al314976</b> | 0.74604 | 0.0023   | 0.00899 | 0.76868 | 0.0137   | 0.04392 |
| <b>Rps25</b>    | 0.74568 | 0.00015  | 0.00086 | 1.06574 | 0.00255  | 0.01114 |
| <b>Slc35e1</b>  | 0.74549 | 0.00045  | 0.00224 | 0.97013 | 0.0032   | 0.01343 |

|                      |         |          |         |         |          |         |
|----------------------|---------|----------|---------|---------|----------|---------|
| <b>Hnrnpul2</b>      | 0.74549 | 2.00E-04 | 0.00111 | 0.91786 | 0.0054   | 0.02055 |
| <b>Pgd</b>           | 0.74288 | 0.0032   | 0.01181 | 0.90575 | 0.00425  | 0.01698 |
| <b>Snx13</b>         | 0.74186 | 0.00055  | 0.00266 | 0.94271 | 0.00295  | 0.01259 |
| <b>Rpl30</b>         | 0.74118 | 0.00085  | 0.00387 | 1.07328 | 0.0024   | 0.01064 |
| <b>Arl4a</b>         | 0.74006 | 0.003    | 0.01117 | 1.20162 | 0.00065  | 0.00359 |
| <b>Inmt</b>          | 0.74006 | 0.00365  | 0.01315 | 4.22415 | 5.00E-05 | 0.00038 |
| <b>Hist1h4h</b>      | 0.7397  | 0.0131   | 0.03794 | 2.12956 | 5.00E-05 | 0.00038 |
| <b>Ier5</b>          | 0.73968 | 0.0053   | 0.01805 | 0.80291 | 0.01145  | 0.03798 |
| <b>Eif4h</b>         | 0.73914 | 2.00E-04 | 0.00111 | 1.07168 | 0.002    | 0.00918 |
| <b>Bckdhb</b>        | 0.73765 | 0.0028   | 0.01059 | 1.33543 | 0.00025  | 0.00159 |
| <b>Abt1</b>          | 0.73705 | 0.00445  | 0.01557 | 0.97108 | 0.0027   | 0.01168 |
| <b>Nudt22</b>        | 0.73563 | 0.01305  | 0.03783 | 1.15847 | 9.00E-04 | 0.0047  |
| <b>Khsrp</b>         | 0.73335 | 0.00335  | 0.01227 | 0.84327 | 0.0089   | 0.03106 |
| <b>Cd164</b>         | 0.73284 | 3.00E-04 | 0.00158 | 1.24714 | 0.00045  | 0.00262 |
| <b>Sh3pxd2a</b>      | 0.73197 | 4.00E-04 | 0.00203 | 0.7906  | 0.0133   | 0.04283 |
| <b>4933407C03Rik</b> | 0.73166 | 0.00505  | 0.01733 | 1.22079 | 0.00025  | 0.00159 |
| <b>Nt5c2</b>         | 0.73136 | 0.0133   | 0.0384  | 1.28048 | 0.00025  | 0.00159 |
| <b>Trp53bp2</b>      | 0.73123 | 0.0029   | 0.0109  | 1.0525  | 0.00065  | 0.00359 |
| <b>Pde4d</b>         | 0.72983 | 0.00045  | 0.00224 | 2.58436 | 5.00E-05 | 0.00038 |
| <b>Rps6</b>          | 0.72957 | 0.00035  | 0.00181 | 1.14277 | 3.00E-04 | 0.00184 |
| <b>Glrx</b>          | 0.72752 | 7.00E-04 | 0.00328 | 0.91242 | 0.0052   | 0.01999 |
| <b>Snta1</b>         | 0.72716 | 4.00E-04 | 0.00203 | 0.90903 | 0.0128   | 0.04148 |
| <b>Rrp1</b>          | 0.72505 | 7.00E-04 | 0.00328 | 0.96267 | 0.00285  | 0.01222 |
| <b>Tmem86a</b>       | 0.72463 | 0.00845  | 0.02651 | 1.32185 | 0.00035  | 0.00212 |
| <b>Sfswap</b>        | 0.72295 | 0.00145  | 0.0061  | 1.12449 | 0.00035  | 0.00212 |
| <b>Rpl22l1</b>       | 0.72246 | 0.00075  | 0.00349 | 1.45549 | 5.00E-05 | 0.00038 |
| <b>Rilpl1</b>        | 0.72231 | 0.00015  | 0.00086 | 1.12815 | 0.00115  | 0.00578 |
| <b>2310036O22Rik</b> | 0.72199 | 0.0016   | 0.00663 | 1.11904 | 0.00035  | 0.00212 |
| <b>Zcchc2</b>        | 0.72168 | 0.003    | 0.01117 | 1.14915 | 0.00025  | 0.00159 |
| <b>Rpl22</b>         | 0.72124 | 0.0058   | 0.01944 | 1.01757 | 0.01265  | 0.0411  |
| <b>Rprd2</b>         | 0.72059 | 0.00205  | 0.00814 | 1.16077 | 0.00105  | 0.00534 |
| <b>Fam195b</b>       | 0.7196  | 0.0012   | 0.00518 | 1.21455 | 1.00E-04 | 0.00072 |
| <b>Rpl32</b>         | 0.71818 | 4.00E-04 | 0.00203 | 0.9765  | 0.0043   | 0.01712 |
| <b>Kctd6</b>         | 0.71678 | 0.00855  | 0.02678 | 1.07162 | 0.00165  | 0.00782 |
| <b>Hsd17b10</b>      | 0.71673 | 6.00E-04 | 0.00286 | 0.97592 | 0.00165  | 0.00782 |
| <b>Sertad1</b>       | 0.71654 | 0.01055  | 0.0318  | 1.32372 | 1.00E-04 | 0.00072 |
| <b>Dtx2</b>          | 0.71424 | 0.01695  | 0.04676 | 0.93906 | 0.00945  | 0.03266 |
| <b>Sap130</b>        | 0.71358 | 0.00325  | 0.01196 | 0.99209 | 0.0013   | 0.00641 |
| <b>Dgcr14</b>        | 0.71115 | 0.00695  | 0.02258 | 0.95324 | 0.00405  | 0.01634 |
| <b>Klhl34</b>        | 0.71042 | 0.00485  | 0.01675 | -0.8755 | 0.00815  | 0.0289  |
| <b>Cnksr3</b>        | 0.71027 | 0.01775  | 0.0485  | 1.90733 | 5.00E-05 | 0.00038 |

|                 |         |          |         |         |          |         |
|-----------------|---------|----------|---------|---------|----------|---------|
| <b>Spg21</b>    | 0.70985 | 0.008    | 0.02536 | 1.20352 | 0.00035  | 0.00212 |
| <b>Rabac1</b>   | 0.70879 | 5.00E-04 | 0.00244 | 1.50204 | 5.00E-05 | 0.00038 |
| <b>Pan2</b>     | 0.70698 | 0.0041   | 0.01451 | 0.99189 | 0.00155  | 0.00742 |
| <b>Cdc42ep4</b> | 0.70676 | 0.00575  | 0.0193  | 1.47633 | 5.00E-05 | 0.00038 |
| <b>Arid5b</b>   | 0.70484 | 0.0088   | 0.02744 | 1.02002 | 0.003    | 0.01275 |
| <b>Rpl27</b>    | 0.70439 | 0.00075  | 0.00349 | 0.98216 | 0.0025   | 0.011   |
| <b>Rai14</b>    | 0.70408 | 0.0055   | 0.01859 | 0.86064 | 0.00665  | 0.02443 |
| <b>Nos3</b>     | 0.70333 | 0.00635  | 0.02101 | 1.27119 | 1.00E-04 | 0.00072 |
| <b>Tmf1</b>     | 0.70219 | 0.00205  | 0.00814 | 1.07643 | 0.00045  | 0.00262 |
| <b>Cln6</b>     | 0.70158 | 0.0086   | 0.02689 | 1.06921 | 0.00095  | 0.00492 |
| <b>Rps13</b>    | 0.70004 | 8.00E-04 | 0.00368 | 0.92543 | 0.00405  | 0.01634 |
| <b>Dbnl</b>     | 0.69875 | 0.0067   | 0.02193 | 0.8013  | 0.0132   | 0.04258 |
| <b>Cebpz</b>    | 0.69605 | 0.0038   | 0.01361 | 0.85985 | 0.01385  | 0.04424 |
| <b>Gtf2ird1</b> | 0.69261 | 0.01045  | 0.03157 | 0.97988 | 0.0031   | 0.01309 |
| <b>Sestd1</b>   | 0.69235 | 0.00475  | 0.01645 | 2.30691 | 5.00E-05 | 0.00038 |
| <b>Gba</b>      | 0.69235 | 0.00375  | 0.01345 | 0.95677 | 0.00275  | 0.01187 |
| <b>Tubb6</b>    | 0.69231 | 0.00675  | 0.02206 | 1.53225 | 5.00E-05 | 0.00038 |
| <b>Vps11</b>    | 0.69106 | 0.0017   | 0.00699 | 1.0238  | 0.0013   | 0.00641 |
| <b>Ccdc93</b>   | 0.69037 | 0.00445  | 0.01557 | 0.93903 | 0.00985  | 0.03368 |
| <b>Dnajc21</b>  | 0.69024 | 0.00095  | 0.00425 | 0.79896 | 0.0124   | 0.04046 |
| <b>Acap2</b>    | 0.69021 | 0.00285  | 0.01076 | 0.87586 | 0.0041   | 0.0165  |
| <b>Fau</b>      | 0.68903 | 0.0011   | 0.00481 | 1.55337 | 5.00E-05 | 0.00038 |
| <b>Rpl34</b>    | 0.68887 | 8.00E-04 | 0.00368 | 0.9287  | 0.00435  | 0.01729 |
| <b>Grina</b>    | 0.68442 | 8.00E-04 | 0.00368 | 1.29621 | 3.00E-04 | 0.00184 |
| <b>Hdac4</b>    | 0.68264 | 0.00355  | 0.01288 | 0.75253 | 0.0151   | 0.04724 |
| <b>Srek1</b>    | 0.68253 | 0.0017   | 0.00699 | 0.98806 | 0.00075  | 0.00405 |
| <b>Taf4a</b>    | 0.67849 | 0.0183   | 0.04973 | 1.05469 | 0.0014   | 0.00681 |
| <b>Snx8</b>     | 0.67774 | 0.0049   | 0.01691 | 1.04763 | 9.00E-04 | 0.0047  |
| <b>Mob2</b>     | 0.67751 | 0.00135  | 0.00572 | 0.84985 | 0.00655  | 0.02414 |
| <b>Rpl7a</b>    | 0.67596 | 7.00E-04 | 0.00328 | 0.99602 | 0.00515  | 0.01983 |
| <b>Numa1</b>    | 0.67583 | 0.00715  | 0.02309 | 0.90323 | 0.0155   | 0.04817 |
| <b>Cpsf4</b>    | 0.67553 | 0.01675  | 0.04633 | 0.94795 | 0.0054   | 0.02055 |
| <b>Supt16h</b>  | 0.6754  | 0.0026   | 0.00995 | 0.8399  | 0.00565  | 0.02137 |
| <b>Adcy4</b>    | 0.67505 | 0.01025  | 0.03107 | 0.81113 | 0.00965  | 0.03319 |
| <b>Zfp574</b>   | 0.67496 | 0.0072   | 0.02322 | 0.9047  | 0.0042   | 0.01681 |
| <b>Atp6v1d</b>  | 0.67347 | 0.001    | 0.00445 | 0.95963 | 0.003    | 0.01275 |
| <b>Dock6</b>    | 0.67274 | 0.00185  | 0.00749 | 1.31781 | 5.00E-05 | 0.00038 |
| <b>Hibadh</b>   | 0.67241 | 8.00E-04 | 0.00368 | 0.92025 | 0.00705  | 0.02568 |
| <b>Arhgdia</b>  | 0.67209 | 0.00085  | 0.00387 | 0.90618 | 0.00425  | 0.01698 |
| <b>Ilf3</b>     | 0.6718  | 0.0018   | 0.00733 | 1.21756 | 5.00E-05 | 0.00038 |
| <b>AI848100</b> | 0.66887 | 0.0058   | 0.01944 | 1.55555 | 5.00E-05 | 0.00038 |

|                      |         |         |         |         |          |         |
|----------------------|---------|---------|---------|---------|----------|---------|
| <b>Rpl23</b>         | 0.66849 | 0.00095 | 0.00425 | 1.01196 | 0.00585  | 0.02197 |
| <b>Rpl3</b>          | 0.66708 | 0.00205 | 0.00814 | 1.86134 | 5.00E-05 | 0.00038 |
| <b>Dapk3</b>         | 0.66686 | 0.00655 | 0.02155 | 0.98879 | 0.0017   | 0.00803 |
| <b>Usp8</b>          | 0.66686 | 0.0017  | 0.00699 | 1.0336  | 7.00E-04 | 0.00383 |
| <b>Med9</b>          | 0.66645 | 0.0031  | 0.0115  | 0.76816 | 0.0108   | 0.0362  |
| <b>Irf2bp2</b>       | 0.66542 | 0.00255 | 0.00979 | 1.83161 | 5.00E-05 | 0.00038 |
| <b>Tbca</b>          | 0.66277 | 0.00725 | 0.02336 | 0.76472 | 0.0138   | 0.04415 |
| <b>H47</b>           | 0.66014 | 0.0042  | 0.01482 | 1.20657 | 2.00E-04 | 0.00131 |
| <b>Polr3d</b>        | 0.65911 | 0.00485 | 0.01675 | 0.97751 | 0.00165  | 0.00782 |
| <b>H13</b>           | 0.65902 | 0.00945 | 0.0291  | 1.10102 | 0.00185  | 0.00861 |
| <b>Esyt2</b>         | 0.65779 | 0.0015  | 0.00627 | 1.63681 | 5.00E-05 | 0.00038 |
| <b>Pcnt</b>          | 0.65573 | 0.00125 | 0.00536 | 1.28552 | 3.00E-04 | 0.00184 |
| <b>1810027O10Rik</b> | 0.65558 | 0.00385 | 0.01375 | 1.08117 | 0.00075  | 0.00405 |
| <b>Adh1</b>          | 0.65365 | 0.0032  | 0.01181 | 1.13049 | 0.00025  | 0.00159 |
| <b>Mitf</b>          | 0.6531  | 0.00665 | 0.0218  | 0.92732 | 0.00395  | 0.01606 |
| <b>Rpl10</b>         | 0.65208 | 0.0012  | 0.00518 | 1.1474  | 0.00235  | 0.01046 |
| <b>Lonp2</b>         | 0.65198 | 0.00565 | 0.01901 | 1.00628 | 0.00395  | 0.01606 |
| <b>Tsc22d3</b>       | 0.6509  | 0.0022  | 0.00865 | 1.92095 | 0.00015  | 0.00102 |
| <b>Rpl12</b>         | 0.65005 | 0.0046  | 0.016   | 1.38051 | 2.00E-04 | 0.00131 |
| <b>Foxj2</b>         | 0.649   | 0.0024  | 0.00929 | 1.05449 | 0.00165  | 0.00782 |
| <b>Eif3k</b>         | 0.64734 | 0.00215 | 0.00849 | 0.86863 | 0.0057   | 0.0215  |
| <b>Dek</b>           | 0.64526 | 0.005   | 0.01719 | 0.9713  | 0.0026   | 0.01132 |
| <b>Rab3gap1</b>      | 0.64514 | 0.0143  | 0.04069 | 1.09695 | 0.00165  | 0.00782 |
| <b>Dnajc13</b>       | 0.64509 | 0.00235 | 0.00914 | 0.7613  | 0.0144   | 0.04556 |
| <b>Rpl37</b>         | 0.64465 | 0.00215 | 0.00849 | 1.04554 | 0.00145  | 0.00702 |
| <b>Cdc42bpb</b>      | 0.64327 | 0.0019  | 0.00766 | 0.91752 | 0.002    | 0.00918 |
| <b>Hnrnpa0</b>       | 0.63919 | 0.0029  | 0.0109  | 0.83501 | 0.00815  | 0.0289  |
| <b>Sart3</b>         | 0.6386  | 0.0082  | 0.02591 | 1.26089 | 5.00E-05 | 0.00038 |
| <b>Ddx20</b>         | 0.6351  | 0.0111  | 0.03307 | 0.98595 | 0.00125  | 0.00621 |
| <b>Aebp1</b>         | 0.63195 | 0.0077  | 0.02458 | 0.86162 | 0.00975  | 0.03344 |
| <b>Rpl21</b>         | 0.63003 | 0.00275 | 0.01043 | 0.92659 | 0.00795  | 0.02834 |
| <b>Picalm</b>        | 0.62784 | 0.0018  | 0.00733 | 0.8711  | 0.0103   | 0.03481 |
| <b>Pcna</b>          | 0.62271 | 0.0072  | 0.02322 | 0.90802 | 0.0034   | 0.01416 |
| <b>Eea1</b>          | 0.62234 | 0.003   | 0.01117 | 0.99596 | 0.0011   | 0.00557 |
| <b>Vps37c</b>        | 0.62173 | 0.0066  | 0.02167 | 0.76154 | 0.013    | 0.04201 |
| <b>Dus3l</b>         | 0.61715 | 0.00755 | 0.02417 | 0.78411 | 0.0093   | 0.03221 |
| <b>Dnajc8</b>        | 0.61338 | 0.00525 | 0.0179  | 0.94665 | 0.0025   | 0.011   |
| <b>Pitrm1</b>        | 0.61249 | 0.00525 | 0.0179  | 0.94116 | 0.00725  | 0.02628 |
| <b>Rps23</b>         | 0.60994 | 0.0028  | 0.01059 | 1.06237 | 0.00105  | 0.00534 |
| <b>Nnt</b>           | 0.60788 | 0.0037  | 0.01329 | 0.95411 | 0.0055   | 0.02087 |
| <b>AW555464</b>      | 0.60721 | 0.01825 | 0.04962 | 1.23267 | 0.00015  | 0.00102 |

|                |         |         |         |         |          |         |
|----------------|---------|---------|---------|---------|----------|---------|
| <b>Zfyve21</b> | 0.60481 | 0.0164  | 0.04557 | 1.54285 | 5.00E-05 | 0.00038 |
| <b>Tnpo1</b>   | 0.60448 | 0.00305 | 0.01133 | 0.75279 | 0.0138   | 0.04415 |
| <b>Chmp4b</b>  | 0.60386 | 0.00355 | 0.01288 | 1.3365  | 4.00E-04 | 0.00237 |
| <b>Robo4</b>   | 0.60329 | 0.0088  | 0.02744 | 0.97198 | 0.00145  | 0.00702 |
| <b>Man2b1</b>  | 0.60233 | 0.01295 | 0.03761 | 0.93869 | 0.0031   | 0.01309 |
| <b>Popdc3</b>  | 0.5999  | 0.00705 | 0.02283 | 0.88614 | 0.01085  | 0.03634 |
| <b>Rps27a</b>  | 0.59943 | 0.0032  | 0.01181 | 1.00276 | 0.0042   | 0.01681 |
| <b>Rps7</b>    | 0.59916 | 0.0032  | 0.01181 | 0.9704  | 0.00455  | 0.01797 |
| <b>Clta</b>    | 0.5982  | 0.0063  | 0.02089 | 0.99774 | 0.0015   | 0.00723 |
| <b>Mpp5</b>    | 0.59683 | 0.00565 | 0.01901 | 1.08122 | 0.001    | 0.00513 |
| <b>Atp5g2</b>  | 0.59566 | 0.00345 | 0.01257 | 0.9302  | 0.009    | 0.03133 |
| <b>Vps72</b>   | 0.59523 | 0.008   | 0.02536 | 1.28313 | 5.00E-05 | 0.00038 |
| <b>Mdm4</b>    | 0.59051 | 0.0154  | 0.04329 | 0.89936 | 0.0056   | 0.0212  |
| <b>Usp31</b>   | 0.58971 | 0.0135  | 0.03888 | 0.86559 | 0.0047   | 0.01846 |
| <b>Rpl17</b>   | 0.58956 | 0.0035  | 0.01272 | 0.98643 | 0.00285  | 0.01222 |
| <b>Fbrsl1</b>  | 0.58933 | 0.0145  | 0.04116 | 0.89512 | 0.00535  | 0.0204  |
| <b>Ube2q1</b>  | 0.58359 | 0.0089  | 0.02769 | 0.77857 | 0.0113   | 0.03759 |
| <b>Anxa7</b>   | 0.58118 | 0.00525 | 0.0179  | 1.07846 | 0.00105  | 0.00534 |
| <b>Pxk</b>     | 0.58033 | 0.0123  | 0.03607 | 1.5787  | 5.00E-05 | 0.00038 |
| <b>Rtf1</b>    | 0.58008 | 0.0053  | 0.01805 | 1.019   | 0.00045  | 0.00262 |
| <b>Ssfa2</b>   | 0.57833 | 0.0069  | 0.02243 | 0.87853 | 0.00335  | 0.01398 |
| <b>Ubp1</b>    | 0.57621 | 0.0142  | 0.0405  | 0.91376 | 0.0064   | 0.02368 |
| <b>Frg1</b>    | 0.57595 | 0.01665 | 0.04611 | 0.77703 | 0.01405  | 0.04467 |
| <b>Hmgn5</b>   | 0.57551 | 0.01745 | 0.04787 | 1.08546 | 6.00E-04 | 0.00335 |
| <b>Smarcc2</b> | 0.57086 | 0.0066  | 0.02167 | 0.94605 | 0.0032   | 0.01343 |
| <b>C78339</b>  | 0.56896 | 0.00565 | 0.01901 | 0.81562 | 0.01     | 0.0341  |
| <b>Rpl8</b>    | 0.56224 | 0.00615 | 0.02048 | 1.04612 | 0.00465  | 0.01831 |
| <b>Specc1l</b> | 0.55243 | 0.0078  | 0.02484 | 0.82849 | 0.0075   | 0.02702 |
| <b>Rnf144b</b> | 0.55206 | 0.01135 | 0.03375 | 0.96605 | 0.00135  | 0.00662 |
| <b>Cnn3</b>    | 0.54582 | 0.01775 | 0.0485  | 0.83887 | 0.00585  | 0.02197 |
| <b>Trip10</b>  | 0.54545 | 0.00625 | 0.02076 | 0.88001 | 0.0104   | 0.03511 |
| <b>Cpeb2</b>   | 0.54276 | 0.01615 | 0.04502 | 1.98172 | 5.00E-05 | 0.00038 |
| <b>Tmem11</b>  | 0.52965 | 0.01475 | 0.04178 | 0.77174 | 0.01115  | 0.03717 |
| <b>Rpl38</b>   | 0.52587 | 0.01145 | 0.03402 | 1.11616 | 0.00045  | 0.00262 |
| <b>Rps17</b>   | 0.52419 | 0.01035 | 0.03132 | 1.00414 | 0.0051   | 0.01969 |
| <b>Rps16</b>   | 0.51402 | 0.0107  | 0.03213 | 1.10687 | 9.00E-04 | 0.0047  |
| <b>Rps24</b>   | 0.51364 | 0.0098  | 0.02992 | 0.98415 | 0.0056   | 0.0212  |
| <b>Gars</b>    | 0.50501 | 0.0133  | 0.0384  | 1.02851 | 0.00155  | 0.00742 |
| <b>Cdv3</b>    | 0.50347 | 0.0133  | 0.0384  | 1.28325 | 0.0019   | 0.0088  |
| <b>Rps29</b>   | 0.49875 | 0.01305 | 0.03783 | 0.97008 | 0.00425  | 0.01698 |
| <b>Rps11</b>   | 0.49417 | 0.0149  | 0.04212 | 0.90587 | 0.00805  | 0.02863 |

|                      |         |         |         |         |          |         |
|----------------------|---------|---------|---------|---------|----------|---------|
| <b>Rpl28</b>         | 0.49177 | 0.0171  | 0.04706 | 0.88349 | 0.0074   | 0.02672 |
| <b>Rps21</b>         | 0.48718 | 0.0181  | 0.04931 | 1.16837 | 0.00045  | 0.00262 |
| <b>Rps5</b>          | 0.48612 | 0.01585 | 0.04434 | 1.02852 | 0.0051   | 0.01969 |
| <b>Tnks2</b>         | -0.4905 | 0.01625 | 0.04524 | -1.1578 | 0.00035  | 0.00212 |
| <b>Ndufs1</b>        | -0.5033 | 0.01635 | 0.04547 | -1.4855 | 6.00E-04 | 0.00335 |
| <b>C2cd2</b>         | -0.5264 | 0.0108  | 0.03234 | -1.4323 | 5.00E-05 | 0.00038 |
| <b>Qser1</b>         | -0.5271 | 0.0106  | 0.03191 | -0.8177 | 0.00925  | 0.03206 |
| <b>Rab10</b>         | -0.5301 | 0.00985 | 0.03005 | -0.9541 | 0.00815  | 0.0289  |
| <b>Cyc1</b>          | -0.5336 | 0.00995 | 0.03031 | -1.2075 | 0.0015   | 0.00723 |
| <b>Rap1gds1</b>      | -0.5539 | 0.0075  | 0.02403 | -1.039  | 3.00E-04 | 0.00184 |
| <b>Sec23a</b>        | -0.5544 | 0.0071  | 0.02297 | -1.021  | 0.0021   | 0.00957 |
| <b>Stom</b>          | -0.555  | 0.0149  | 0.04212 | -0.9819 | 0.00205  | 0.00937 |
| <b>Clec16a</b>       | -0.5568 | 0.0125  | 0.03659 | -1.323  | 5.00E-05 | 0.00038 |
| <b>Pde7b</b>         | -0.5678 | 0.0102  | 0.03095 | -1.7878 | 5.00E-05 | 0.00038 |
| <b>Zfp706</b>        | -0.5713 | 0.00745 | 0.0239  | -0.9553 | 0.0028   | 0.01205 |
| <b>Nid1</b>          | -0.5716 | 0.00625 | 0.02076 | -1.1255 | 0.00025  | 0.00159 |
| <b>Fkbp3</b>         | -0.5729 | 0.0153  | 0.04309 | -1.13   | 0.00365  | 0.01502 |
| <b>Parp8</b>         | -0.582  | 0.01335 | 0.03852 | -1.0769 | 0.0017   | 0.00803 |
| <b>Alas1</b>         | -0.5852 | 0.01325 | 0.03829 | -1.9128 | 5.00E-05 | 0.00038 |
| <b>Abhd11</b>        | -0.5869 | 0.0134  | 0.03863 | -0.9585 | 0.00345  | 0.01434 |
| <b>4732418C07Rik</b> | -0.5877 | 0.01095 | 0.03273 | -1.0414 | 9.00E-04 | 0.0047  |
| <b>Mrpl13</b>        | -0.5903 | 0.0124  | 0.03633 | -0.977  | 0.0043   | 0.01712 |
| <b>Mgll</b>          | -0.5933 | 0.0076  | 0.02432 | -1.212  | 5.00E-05 | 0.00038 |
| <b>Mrps36</b>        | -0.595  | 0.01815 | 0.04939 | -0.8966 | 0.00565  | 0.02137 |
| <b>Aars2</b>         | -0.5956 | 0.012   | 0.0353  | -1.345  | 5.00E-05 | 0.00038 |
| <b>Nrp1</b>          | -0.5965 | 0.00545 | 0.01845 | -1.2459 | 5.00E-05 | 0.00038 |
| <b>BC031181</b>      | -0.5995 | 0.0143  | 0.04069 | -0.8788 | 0.00525  | 0.02013 |
| <b>Chchd1</b>        | -0.6011 | 0.0051  | 0.01748 | -1.2536 | 1.00E-04 | 0.00072 |
| <b>Ralgapa1</b>      | -0.605  | 0.00575 | 0.0193  | -1.0898 | 4.00E-04 | 0.00237 |
| <b>Mrpl42</b>        | -0.606  | 0.0029  | 0.0109  | -1.0182 | 0.0022   | 0.00992 |
| <b>Lcmt1</b>         | -0.6065 | 0.00805 | 0.0255  | -1.5327 | 5.00E-05 | 0.00038 |
| <b>Ids</b>           | -0.6065 | 0.0057  | 0.01917 | -0.8482 | 0.0048   | 0.01873 |
| <b>Tmem117</b>       | -0.6071 | 0.0114  | 0.03389 | -1.2132 | 1.00E-04 | 0.00072 |
| <b>Amotl1</b>        | -0.6073 | 0.00335 | 0.01227 | -1.5781 | 5.00E-05 | 0.00038 |
| <b>Neo1</b>          | -0.6078 | 0.00495 | 0.01705 | -1.1536 | 3.00E-04 | 0.00184 |
| <b>Dynlt3</b>        | -0.6089 | 0.0038  | 0.01361 | -1.3378 | 5.00E-05 | 0.00038 |
| <b>Anxa5</b>         | -0.6143 | 0.0107  | 0.03213 | -0.8035 | 0.0089   | 0.03106 |
| <b>Cdc42</b>         | -0.6148 | 0.0027  | 0.01026 | -0.8268 | 0.011    | 0.03678 |
| <b>Epm2a</b>         | -0.6149 | 0.00255 | 0.00979 | -1.1123 | 0.00025  | 0.00159 |
| <b>Sae1</b>          | -0.6156 | 0.00695 | 0.02258 | -0.8232 | 0.0083   | 0.02932 |
| <b>Daglb</b>         | -0.6163 | 0.01255 | 0.03669 | -1.0558 | 0.00085  | 0.00449 |

|                      |         |         |         |         |          |         |
|----------------------|---------|---------|---------|---------|----------|---------|
| <b>Abcb4</b>         | -0.6198 | 0.01105 | 0.03297 | -1.6443 | 5.00E-05 | 0.00038 |
| <b>Scoc</b>          | -0.621  | 0.00845 | 0.02651 | -1.1279 | 0.00015  | 0.00102 |
| <b>Habp4</b>         | -0.6227 | 0.00665 | 0.0218  | -1.0908 | 5.00E-04 | 0.00287 |
| <b>Sod2</b>          | -0.625  | 0.0027  | 0.01026 | -1.5034 | 1.00E-04 | 0.00072 |
| <b>Laptm4a</b>       | -0.6286 | 0.0018  | 0.00733 | -0.9718 | 0.0048   | 0.01873 |
| <b>Pgk1</b>          | -0.6296 | 0.00275 | 0.01043 | -1.2134 | 0.00225  | 0.0101  |
| <b>Pola2</b>         | -0.6302 | 0.01805 | 0.04919 | -1.2468 | 0.00045  | 0.00262 |
| <b>Tagap1</b>        | -0.6303 | 0.01815 | 0.04939 | -0.8472 | 0.01005  | 0.03423 |
| <b>Mtfr1</b>         | -0.6329 | 0.00675 | 0.02206 | -1.2207 | 0.0017   | 0.00803 |
| <b>Snap23</b>        | -0.6341 | 0.0049  | 0.01691 | -0.8771 | 0.00385  | 0.01572 |
| <b>Nsun4</b>         | -0.6344 | 0.01355 | 0.03899 | -1.7864 | 5.00E-05 | 0.00038 |
| <b>Itfg1</b>         | -0.6345 | 0.003   | 0.01117 | -1.2269 | 1.00E-04 | 0.00072 |
| <b>Mdp1</b>          | -0.6352 | 0.0094  | 0.02898 | -1.188  | 3.00E-04 | 0.00184 |
| <b>Zdhhc8</b>        | -0.6353 | 0.00515 | 0.01761 | -0.9397 | 0.00285  | 0.01222 |
| <b>Tmem70</b>        | -0.6356 | 0.01165 | 0.03449 | -1.4229 | 0.00015  | 0.00102 |
| <b>Dcun1d1</b>       | -0.636  | 0.0045  | 0.01571 | -1.139  | 0.00015  | 0.00102 |
| <b>Gfpt1</b>         | -0.6367 | 0.0043  | 0.01513 | -0.951  | 0.0013   | 0.00641 |
| <b>Ddo</b>           | -0.6368 | 0.0037  | 0.01329 | -1.7281 | 5.00E-05 | 0.00038 |
| <b>Daam1</b>         | -0.6369 | 0.0096  | 0.02947 | -0.875  | 0.006    | 0.02242 |
| <b>Cbx5</b>          | -0.6373 | 0.00385 | 0.01375 | -1.0476 | 5.00E-04 | 0.00287 |
| <b>Wdr7</b>          | -0.642  | 0.0035  | 0.01272 | -1.6731 | 5.00E-05 | 0.00038 |
| <b>Gpc1</b>          | -0.6428 | 0.0015  | 0.00627 | -1.0953 | 0.00365  | 0.01502 |
| <b>2810407C02Rik</b> | -0.6453 | 0.00115 | 0.005   | -1.5873 | 5.00E-05 | 0.00038 |
| <b>2310042D19Rik</b> | -0.6461 | 0.0017  | 0.00699 | -1.5658 | 5.00E-05 | 0.00038 |
| <b>Psmg2</b>         | -0.6479 | 0.0098  | 0.02992 | -0.944  | 0.00385  | 0.01572 |
| <b>Bves</b>          | -0.6508 | 0.00235 | 0.00914 | -1.1484 | 0.00015  | 0.00102 |
| <b>Hdac2</b>         | -0.6509 | 0.004   | 0.01419 | -1.0126 | 0.00215  | 0.00974 |
| <b>Snrpd3</b>        | -0.6517 | 0.00335 | 0.01227 | -1.3683 | 5.00E-05 | 0.00038 |
| <b>Pofut1</b>        | -0.6527 | 0.0066  | 0.02167 | -1.421  | 5.00E-05 | 0.00038 |
| <b>Ado</b>           | -0.653  | 0.0037  | 0.01329 | -1.4238 | 5.00E-05 | 0.00038 |
| <b>Rhobtb2</b>       | -0.6544 | 0.0062  | 0.02061 | -0.9972 | 0.00215  | 0.00974 |
| <b>Klhl31</b>        | -0.6567 | 0.0016  | 0.00663 | -2.0944 | 5.00E-05 | 0.00038 |
| <b>Slc44a2</b>       | -0.6573 | 0.00195 | 0.00782 | -1.0934 | 0.0022   | 0.00992 |
| <b>14-Sep</b>        | -0.6575 | 0.00265 | 0.01011 | -0.8982 | 0.004    | 0.01623 |
| <b>Lrtm1</b>         | -0.6586 | 0.00115 | 0.005   | -2.5881 | 5.00E-05 | 0.00038 |
| <b>Lamtor2</b>       | -0.6592 | 0.00625 | 0.02076 | -0.8842 | 0.00515  | 0.01983 |
| <b>Gnpnat1</b>       | -0.66   | 0.0117  | 0.03462 | -0.9294 | 0.0047   | 0.01846 |
| <b>Zfp770</b>        | -0.6618 | 0.00425 | 0.01498 | -1.8575 | 5.00E-05 | 0.00038 |
| <b>Ubxn2a</b>        | -0.663  | 0.00285 | 0.01076 | -0.8349 | 0.01035  | 0.03496 |
| <b>Vtn</b>           | -0.6636 | 0.0177  | 0.04841 | -0.849  | 0.01485  | 0.04659 |
| <b>Dusp22</b>        | -0.6655 | 0.0073  | 0.0235  | -1.5129 | 5.00E-05 | 0.00038 |

|                      |         |         |         |         |          |         |
|----------------------|---------|---------|---------|---------|----------|---------|
| <b>Ovol1</b>         | -0.6655 | 0.01035 | 0.03132 | -1.3121 | 0.00015  | 0.00102 |
| <b>Ipo8</b>          | -0.6662 | 0.00405 | 0.01436 | -0.8335 | 0.0049   | 0.01905 |
| <b>Abcd1</b>         | -0.6664 | 0.0029  | 0.0109  | -1.285  | 1.00E-04 | 0.00072 |
| <b>Gtpbp10</b>       | -0.6682 | 0.00945 | 0.0291  | -0.9465 | 0.00255  | 0.01114 |
| <b>Mrs2</b>          | -0.6683 | 0.0069  | 0.02243 | -0.9836 | 0.002    | 0.00918 |
| <b>Hif1an</b>        | -0.6713 | 0.00095 | 0.00425 | -1.2594 | 2.00E-04 | 0.00131 |
| <b>Rbm38</b>         | -0.6714 | 0.0136  | 0.03911 | -1.2175 | 0.00385  | 0.01572 |
| <b>Tmem123</b>       | -0.6731 | 0.0029  | 0.0109  | -1.0467 | 6.00E-04 | 0.00335 |
| <b>Rhoq</b>          | -0.6744 | 0.00095 | 0.00425 | -1.3149 | 2.00E-04 | 0.00131 |
| <b>Ccnyl1</b>        | -0.6762 | 0.003   | 0.01117 | -0.9764 | 0.00135  | 0.00662 |
| <b>Pea15a</b>        | -0.677  | 0.01055 | 0.0318  | -0.951  | 0.00405  | 0.01634 |
| <b>1700021F05Rik</b> | -0.6785 | 0.00225 | 0.00883 | -0.7306 | 0.01455  | 0.04583 |
| <b>Mtif2</b>         | -0.6797 | 0.01225 | 0.03594 | -1.4767 | 5.00E-05 | 0.00038 |
| <b>Frmd6</b>         | -0.681  | 0.00545 | 0.01845 | -1.1778 | 2.00E-04 | 0.00131 |
| <b>Mrpl28</b>        | -0.6818 | 0.00755 | 0.02417 | -1.3928 | 5.00E-04 | 0.00287 |
| <b>Otub2</b>         | -0.6826 | 0.01425 | 0.04059 | -2.14   | 5.00E-05 | 0.00038 |
| <b>2410091C18Rik</b> | -0.6829 | 0.00645 | 0.02127 | -1.0801 | 0.00155  | 0.00742 |
| <b>Lmcd1</b>         | -0.6852 | 0.00085 | 0.00387 | -1.1589 | 9.00E-04 | 0.0047  |
| <b>Eya4</b>          | -0.6868 | 0.00315 | 0.01165 | -1.1155 | 6.00E-04 | 0.00335 |
| <b>Wwp1</b>          | -0.6875 | 0.00185 | 0.00749 | -1.2184 | 0.00185  | 0.00861 |
| <b>Mapre2</b>        | -0.688  | 0.0029  | 0.0109  | -1.1762 | 0.00035  | 0.00212 |
| <b>Tmem2</b>         | -0.689  | 0.0045  | 0.01571 | -0.7673 | 0.0153   | 0.04768 |
| <b>Gtf3c6</b>        | -0.6912 | 0.011   | 0.03285 | -1.1365 | 9.00E-04 | 0.0047  |
| <b>Zmiz2</b>         | -0.6921 | 0.00175 | 0.00715 | -1.0117 | 0.0017   | 0.00803 |
| <b>Ehbp111</b>       | -0.6926 | 0.00245 | 0.00945 | -1.5066 | 6.00E-04 | 0.00335 |
| <b>1600014C10Rik</b> | -0.6949 | 0.0034  | 0.01243 | -1.8297 | 5.00E-05 | 0.00038 |
| <b>Nudt2</b>         | -0.6991 | 0.00735 | 0.02364 | -0.7913 | 0.0121   | 0.03962 |
| <b>Clcn3</b>         | -0.7015 | 0.00195 | 0.00782 | -1.1614 | 3.00E-04 | 0.00184 |
| <b>Acn9</b>          | -0.7033 | 0.0098  | 0.02992 | -1.1822 | 8.00E-04 | 0.00427 |
| <b>Dennd1b</b>       | -0.7047 | 0.00415 | 0.01468 | -1.307  | 5.00E-05 | 0.00038 |
| <b>Map3k10</b>       | -0.7054 | 0.009   | 0.02795 | -1.583  | 5.00E-05 | 0.00038 |
| <b>Trim55</b>        | -0.707  | 0.00105 | 0.00462 | -1.7115 | 5.00E-05 | 0.00038 |
| <b>Ostc</b>          | -0.7114 | 0.0072  | 0.02322 | -1.4029 | 5.00E-05 | 0.00038 |
| <b>Gm8113</b>        | -0.7121 | 0.0168  | 0.04645 | -1.7042 | 5.00E-05 | 0.00038 |
| <b>Gtf2i</b>         | -0.7134 | 0.0063  | 0.02089 | -1.0895 | 0.00315  | 0.01327 |
| <b>Tln2</b>          | -0.7157 | 0.00185 | 0.00749 | -1.4181 | 5.00E-05 | 0.00038 |
| <b>Tbc1d19</b>       | -0.7161 | 0.00315 | 0.01165 | -1.6208 | 5.00E-05 | 0.00038 |
| <b>Atp13a5</b>       | -0.7196 | 0.01645 | 0.04567 | -2.9151 | 0.00025  | 0.00159 |
| <b>Ppm1f</b>         | -0.7206 | 0.00155 | 0.00645 | -0.8878 | 0.0035   | 0.01447 |
| <b>Mlxipl</b>        | -0.7236 | 0.0128  | 0.03724 | -1.3848 | 0.00135  | 0.00662 |
| <b>Gm608</b>         | -0.7239 | 0.002   | 0.00799 | -0.8062 | 0.01175  | 0.03874 |



|                      |         |          |         |         |          |         |
|----------------------|---------|----------|---------|---------|----------|---------|
| <b>Akr1b3</b>        | -0.7253 | 0.00135  | 0.00572 | -1.1463 | 0.001    | 0.00513 |
| <b>6330578E17Rik</b> | -0.7263 | 4.00E-04 | 0.00203 | -1.4778 | 5.00E-05 | 0.00038 |
| <b>Aip</b>           | -0.7284 | 0.0015   | 0.00627 | -0.8248 | 0.0096   | 0.03306 |
| <b>Ptcd3</b>         | -0.732  | 0.00045  | 0.00224 | -1.952  | 5.00E-05 | 0.00038 |
| <b>Prr12</b>         | -0.7321 | 0.00615  | 0.02048 | -1.118  | 7.00E-04 | 0.00383 |
| <b>Idh3a</b>         | -0.7332 | 3.00E-04 | 0.00158 | -1.197  | 0.00425  | 0.01698 |
| <b>Mmgt1</b>         | -0.7339 | 0.00035  | 0.00181 | -1.0095 | 0.00125  | 0.00621 |
| <b>Fndc5</b>         | -0.7349 | 0.00035  | 0.00181 | -1.1539 | 0.00015  | 0.00102 |
| <b>Rabif</b>         | -0.7353 | 0.00925  | 0.0286  | -0.9073 | 0.0041   | 0.0165  |
| <b>4930455C21Rik</b> | -0.7364 | 0.0015   | 0.00627 | -1.296  | 1.00E-04 | 0.00072 |
| <b>Gpc4</b>          | -0.7369 | 0.008    | 0.02536 | -2.3654 | 5.00E-05 | 0.00038 |
| <b>Ano5</b>          | -0.7378 | 0.00025  | 0.00135 | -2.4584 | 5.00E-05 | 0.00038 |
| <b>Ndufc2</b>        | -0.7389 | 6.00E-04 | 0.00286 | -1.4098 | 5.00E-05 | 0.00038 |
| <b>Sdr39u1</b>       | -0.7395 | 5.00E-04 | 0.00244 | -1.0099 | 0.0011   | 0.00557 |
| <b>Pycr2</b>         | -0.7401 | 0.01275  | 0.03713 | -1.2952 | 0.00015  | 0.00102 |
| <b>Tbc1d7</b>        | -0.7447 | 0.00605  | 0.02018 | -1.8201 | 5.00E-05 | 0.00038 |
| <b>Slc25a11</b>      | -0.7449 | 0.001    | 0.00445 | -1.059  | 0.00725  | 0.02628 |
| <b>Gm14420</b>       | -0.7489 | 0.005    | 0.01719 | -1.6281 | 5.00E-05 | 0.00038 |
| <b>Dnajb14</b>       | -0.7509 | 0.0022   | 0.00865 | -1.2347 | 2.00E-04 | 0.00131 |
| <b>Cnm4</b>          | -0.7542 | 0.0044   | 0.01543 | -0.9817 | 0.0027   | 0.01168 |
| <b>Nlr1</b>          | -0.755  | 0.00125  | 0.00536 | -0.9839 | 0.00255  | 0.01114 |
| <b>Dennd4b</b>       | -0.7553 | 0.00685  | 0.02231 | -1.2149 | 0.00165  | 0.00782 |
| <b>Rbms2</b>         | -0.7568 | 0.00335  | 0.01227 | -1.3185 | 3.00E-04 | 0.00184 |
| <b>Snopc1</b>        | -0.7603 | 0.0157   | 0.04398 | -1.1019 | 0.0021   | 0.00957 |
| <b>Golph3l</b>       | -0.7619 | 0.0096   | 0.02947 | -1.3304 | 5.00E-05 | 0.00038 |
| <b>Fut8</b>          | -0.7621 | 0.0028   | 0.01059 | -1.2178 | 0.00025  | 0.00159 |
| <b>Spop</b>          | -0.7623 | 0.01165  | 0.03449 | -1.2564 | 0.00125  | 0.00621 |
| <b>Gnb5</b>          | -0.7627 | 0.0023   | 0.00899 | -1.2157 | 0.00025  | 0.00159 |
| <b>Lynx1</b>         | -0.7645 | 0.00015  | 0.00086 | -2.0058 | 5.00E-05 | 0.00038 |
| <b>Cecr5</b>         | -0.7647 | 7.00E-04 | 0.00328 | -1.4196 | 5.00E-05 | 0.00038 |
| <b>Ap4e1</b>         | -0.7656 | 0.00495  | 0.01705 | -0.9165 | 0.00395  | 0.01606 |
| <b>Mllt3</b>         | -0.7664 | 0.0059   | 0.01972 | -1.0029 | 0.0146   | 0.04595 |
| <b>Qdpr</b>          | -0.7667 | 0.00125  | 0.00536 | -1.0627 | 0.00205  | 0.00937 |
| <b>Trdn</b>          | -0.7678 | 0.00265  | 0.01011 | -1.3822 | 0.00395  | 0.01606 |
| <b>Aldh5a1</b>       | -0.7696 | 0.00215  | 0.00849 | -1.3855 | 5.00E-05 | 0.00038 |
| <b>Flot2</b>         | -0.7696 | 1.00E-04 | 0.0006  | -0.8566 | 0.00585  | 0.02197 |
| <b>Mrpl45</b>        | -0.7698 | 0.00035  | 0.00181 | -1.5247 | 5.00E-05 | 0.00038 |
| <b>Hras1</b>         | -0.7723 | 0.00165  | 0.00681 | -1.0008 | 0.00225  | 0.0101  |
| <b>Hus1</b>          | -0.7748 | 0.00455  | 0.01585 | -1.345  | 4.00E-04 | 0.00237 |
| <b>Ric8b</b>         | -0.7765 | 0.00045  | 0.00224 | -1.0174 | 9.00E-04 | 0.0047  |
| <b>Gmpr</b>          | -0.7792 | 0.00075  | 0.00349 | -1.2888 | 5.00E-05 | 0.00038 |

|                      |         |          |         |         |          |         |
|----------------------|---------|----------|---------|---------|----------|---------|
| <b>Rragd</b>         | -0.7816 | 2.00E-04 | 0.00111 | -1.3664 | 0.00045  | 0.00262 |
| <b>Rnf11</b>         | -0.7843 | 0.00035  | 0.00181 | -1.2966 | 5.00E-05 | 0.00038 |
| <b>Rfng</b>          | -0.7855 | 0.0016   | 0.00663 | -1.4256 | 5.00E-05 | 0.00038 |
| <b>Wdr59</b>         | -0.7883 | 0.00235  | 0.00914 | -1.0812 | 0.0011   | 0.00557 |
| <b>Mpi</b>           | -0.7884 | 1.00E-04 | 0.0006  | -1.3255 | 5.00E-05 | 0.00038 |
| <b>Ube2d1</b>        | -0.7891 | 0.00025  | 0.00135 | -1.5894 | 5.00E-05 | 0.00038 |
| <b>Arl5a</b>         | -0.7903 | 3.00E-04 | 0.00158 | -1.1285 | 2.00E-04 | 0.00131 |
| <b>Trps1</b>         | -0.7907 | 0.00685  | 0.02231 | -1.5216 | 5.00E-05 | 0.00038 |
| <b>S1pr3</b>         | -0.7909 | 0.00855  | 0.02678 | -0.9753 | 0.0067   | 0.02457 |
| <b>Slc38a10</b>      | -0.7918 | 0.0109   | 0.03262 | -1.3691 | 3.00E-04 | 0.00184 |
| <b>Lrrc39</b>        | -0.792  | 3.00E-04 | 0.00158 | -2.2408 | 5.00E-05 | 0.00038 |
| <b>Ppp3ca</b>        | -0.792  | 5.00E-05 | 0.00032 | -1.0775 | 0.00195  | 0.00898 |
| <b>Mtus1</b>         | -0.7926 | 0.00085  | 0.00387 | -1.544  | 5.00E-05 | 0.00038 |
| <b>Senp8</b>         | -0.7951 | 0.011    | 0.03285 | -2.5567 | 5.00E-05 | 0.00038 |
| <b>Hoxa10</b>        | -0.799  | 0.00185  | 0.00749 | -1.3663 | 5.00E-05 | 0.00038 |
| <b>Snrnp25</b>       | -0.7992 | 0.018    | 0.0491  | -1.3356 | 0.00075  | 0.00405 |
| <b>Nsdhl</b>         | -0.8023 | 0.01295  | 0.03761 | -1.6637 | 5.00E-05 | 0.00038 |
| <b>Gusb</b>          | -0.8027 | 0.01255  | 0.03669 | -1.0414 | 0.00235  | 0.01046 |
| <b>Fzd7</b>          | -0.803  | 0.00025  | 0.00135 | -1.0454 | 0.00115  | 0.00578 |
| <b>Minpp1</b>        | -0.8056 | 0.00165  | 0.00681 | -0.9387 | 0.00355  | 0.01466 |
| <b>9630033F20Rik</b> | -0.8072 | 1.00E-04 | 0.0006  | -1.8614 | 5.00E-05 | 0.00038 |
| <b>Hmg20a</b>        | -0.8083 | 0.00095  | 0.00425 | -1.2094 | 5.00E-05 | 0.00038 |
| <b>St3gal6</b>       | -0.8095 | 2.00E-04 | 0.00111 | -1.1505 | 8.00E-04 | 0.00427 |
| <b>Wdr44</b>         | -0.8102 | 0.00125  | 0.00536 | -1.056  | 0.0014   | 0.00681 |
| <b>Rassf3</b>        | -0.8115 | 0.00025  | 0.00135 | -1.3382 | 5.00E-05 | 0.00038 |
| <b>Them4</b>         | -0.8117 | 0.0064   | 0.02114 | -1.0992 | 0.0014   | 0.00681 |
| <b>Ppp3cb</b>        | -0.8119 | 2.00E-04 | 0.00111 | -1.1999 | 0.0012   | 0.006   |
| <b>Sparc</b>         | -0.8145 | 5.00E-05 | 0.00032 | -2.2317 | 5.00E-05 | 0.00038 |
| <b>BC003965</b>      | -0.8175 | 0.00055  | 0.00266 | -1.469  | 5.00E-05 | 0.00038 |
| <b>Ppp1r3a</b>       | -0.8177 | 0.00015  | 0.00086 | -1.0663 | 0.00705  | 0.02568 |
| <b>Slc39a1</b>       | -0.8221 | 3.00E-04 | 0.00158 | -0.8515 | 0.00595  | 0.02226 |
| <b>Nicn1</b>         | -0.8232 | 0.00215  | 0.00849 | -1.0927 | 0.00255  | 0.01114 |
| <b>Aga</b>           | -0.8235 | 0.00235  | 0.00914 | -1.4286 | 5.00E-05 | 0.00038 |
| <b>Ctdnep1</b>       | -0.8238 | 0.00325  | 0.01196 | -1.1342 | 0.0098   | 0.03356 |
| <b>Pon2</b>          | -0.8241 | 0.0084   | 0.0264  | -1.2242 | 0.0013   | 0.00641 |
| <b>Elmo2</b>         | -0.8252 | 0.00705  | 0.02283 | -0.9663 | 0.0117   | 0.03861 |
| <b>4833439L19Rik</b> | -0.8256 | 4.00E-04 | 0.00203 | -1.0701 | 0.00185  | 0.00861 |
| <b>Commd5</b>        | -0.8271 | 0.00645  | 0.02127 | -0.9104 | 0.00995  | 0.03395 |
| <b>Ola1</b>          | -0.8272 | 6.00E-04 | 0.00286 | -1.2834 | 1.00E-04 | 0.00072 |
| <b>Plxnd1</b>        | -0.8284 | 0.00365  | 0.01315 | -1.24   | 0.00045  | 0.00262 |
| <b>Pla2g15</b>       | -0.8335 | 0.0084   | 0.0264  | -1.1362 | 0.00245  | 0.01083 |

|                      |         |          |         |         |          |         |
|----------------------|---------|----------|---------|---------|----------|---------|
| <b>2310030G06Rik</b> | -0.8353 | 0.00785  | 0.02498 | -1.9136 | 5.00E-05 | 0.00038 |
| <b>Dcp2</b>          | -0.8361 | 0.0053   | 0.01805 | -1.2472 | 0.00065  | 0.00359 |
| <b>Pdlim7</b>        | -0.8361 | 5.00E-05 | 0.00032 | -1.6357 | 5.00E-05 | 0.00038 |
| <b>Stard8</b>        | -0.8362 | 0.00435  | 0.01528 | -0.8622 | 0.013    | 0.04201 |
| <b>Hbegf</b>         | -0.837  | 0.0012   | 0.00518 | -1.712  | 5.00E-05 | 0.00038 |
| <b>Apbb1</b>         | -0.8379 | 0.00335  | 0.01227 | -1.0248 | 0.00325  | 0.01363 |
| <b>Capza2</b>        | -0.8384 | 1.00E-04 | 0.0006  | -1.1501 | 0.00115  | 0.00578 |
| <b>Smpd1</b>         | -0.8399 | 0.00025  | 0.00135 | -1.0809 | 8.00E-04 | 0.00427 |
| <b>Nipa2</b>         | -0.8406 | 0.00035  | 0.00181 | -1.4229 | 5.00E-05 | 0.00038 |
| <b>Lman1</b>         | -0.8415 | 0.00015  | 0.00086 | -1.2465 | 1.00E-04 | 0.00072 |
| <b>Mr1</b>           | -0.8436 | 5.00E-04 | 0.00244 | -2.1445 | 5.00E-05 | 0.00038 |
| <b>Dlat</b>          | -0.8452 | 0.00465  | 0.01614 | -1.7513 | 0.00025  | 0.00159 |
| <b>Gng11</b>         | -0.847  | 0.00315  | 0.01165 | -1.2238 | 2.00E-04 | 0.00131 |
| <b>Pdpf</b>          | -0.847  | 0.0028   | 0.01059 | -1.307  | 3.00E-04 | 0.00184 |
| <b>Mtx3</b>          | -0.8472 | 0.00095  | 0.00425 | -1.0361 | 0.001    | 0.00513 |
| <b>Asb4</b>          | -0.8488 | 0.0068   | 0.02218 | -2.8687 | 5.00E-05 | 0.00038 |
| <b>Slc44a1</b>       | -0.8493 | 0.0042   | 0.01482 | -0.783  | 0.0102   | 0.03456 |
| <b>Rnf150</b>        | -0.85   | 5.00E-05 | 0.00032 | -2.7587 | 5.00E-05 | 0.00038 |
| <b>Zfp238</b>        | -0.8531 | 5.00E-05 | 0.00032 | -1.1179 | 0.00045  | 0.00262 |
| <b>Pptc7</b>         | -0.8534 | 4.00E-04 | 0.00203 | -1.3513 | 0.0011   | 0.00557 |
| <b>Ift27</b>         | -0.8547 | 0.01105  | 0.03297 | -1.562  | 8.00E-04 | 0.00427 |
| <b>Cav3</b>          | -0.856  | 0.00045  | 0.00224 | -2.4272 | 5.00E-05 | 0.00038 |
| <b>Mat2a</b>         | -0.858  | 1.00E-04 | 0.0006  | -1.2018 | 0.00025  | 0.00159 |
| <b>Gatc</b>          | -0.8586 | 2.00E-04 | 0.00111 | -1.849  | 5.00E-05 | 0.00038 |
| <b>Cdnf</b>          | -0.8602 | 0.0027   | 0.01026 | -1.4461 | 5.00E-05 | 0.00038 |
| <b>Neurl1a</b>       | -0.861  | 5.00E-05 | 0.00032 | -1.1234 | 0.00025  | 0.00159 |
| <b>Prkar2a</b>       | -0.861  | 5.00E-05 | 0.00032 | -1.5091 | 5.00E-05 | 0.00038 |
| <b>Cryab</b>         | -0.8614 | 5.00E-05 | 0.00032 | -1.9327 | 5.00E-05 | 0.00038 |
| <b>Ube2n</b>         | -0.8618 | 1.00E-04 | 0.0006  | -1.5207 | 5.00E-05 | 0.00038 |
| <b>Efha2</b>         | -0.8633 | 8.00E-04 | 0.00368 | -0.9189 | 0.00685  | 0.02504 |
| <b>Haus1</b>         | -0.8639 | 0.0041   | 0.01451 | -0.864  | 0.012    | 0.03937 |
| <b>Pcbp4</b>         | -0.867  | 0.00015  | 0.00086 | -0.8282 | 0.00985  | 0.03368 |
| <b>Cd81</b>          | -0.8699 | 1.00E-04 | 0.0006  | -1.2668 | 5.00E-05 | 0.00038 |
| <b>Tpst1</b>         | -0.8735 | 0.0174   | 0.04775 | -1.4689 | 3.00E-04 | 0.00184 |
| <b>Klhdc10</b>       | -0.8737 | 5.00E-05 | 0.00032 | -1.3761 | 5.00E-05 | 0.00038 |
| <b>Tbc1d16</b>       | -0.8744 | 1.00E-04 | 0.0006  | -0.8613 | 0.0082   | 0.02904 |
| <b>Prkaca</b>        | -0.8749 | 5.00E-05 | 0.00032 | -1.7639 | 5.00E-05 | 0.00038 |
| <b>Tmtc3</b>         | -0.8758 | 0.00465  | 0.01614 | -1.3483 | 2.00E-04 | 0.00131 |
| <b>Svep1</b>         | -0.876  | 0.0015   | 0.00627 | -1.0657 | 0.00115  | 0.00578 |
| <b>Asah2</b>         | -0.8779 | 0.0014   | 0.00591 | -1.9847 | 5.00E-05 | 0.00038 |
| <b>Gls</b>           | -0.8795 | 0.01375  | 0.03947 | -1.5357 | 5.00E-05 | 0.00038 |

|                      |         |          |         |         |          |         |
|----------------------|---------|----------|---------|---------|----------|---------|
| <b>Pole4</b>         | -0.8799 | 0.00075  | 0.00349 | -1.1976 | 0.00055  | 0.00312 |
| <b>Katnal1</b>       | -0.8806 | 0.0014   | 0.00591 | -1.4122 | 0.00025  | 0.00159 |
| <b>Gatad1</b>        | -0.8807 | 0.00135  | 0.00572 | -1.0562 | 0.0078   | 0.0279  |
| <b>Clasp2</b>        | -0.8814 | 2.00E-04 | 0.00111 | -1.1873 | 1.00E-04 | 0.00072 |
| <b>Capn1</b>         | -0.8815 | 1.00E-04 | 0.0006  | -1.3102 | 5.00E-05 | 0.00038 |
| <b>Bphl</b>          | -0.8821 | 0.00085  | 0.00387 | -1.8822 | 5.00E-05 | 0.00038 |
| <b>Svip</b>          | -0.8834 | 5.00E-05 | 0.00032 | -1.3621 | 5.00E-05 | 0.00038 |
| <b>D4ErtD22e</b>     | -0.884  | 0.0154   | 0.04329 | -1.5188 | 1.00E-04 | 0.00072 |
| <b>Fam82a1</b>       | -0.8842 | 0.0029   | 0.0109  | -1.2167 | 0.00075  | 0.00405 |
| <b>Spr</b>           | -0.8845 | 3.00E-04 | 0.00158 | -1.1478 | 6.00E-04 | 0.00335 |
| <b>4933433P14Rik</b> | -0.8859 | 0.0024   | 0.00929 | -1.3367 | 0.00015  | 0.00102 |
| <b>2610203C20Rik</b> | -0.8864 | 0.00215  | 0.00849 | -1.0126 | 0.0033   | 0.01381 |
| <b>Paqr4</b>         | -0.8865 | 0.0128   | 0.03724 | -1.2126 | 0.00255  | 0.01114 |
| <b>Abcb7</b>         | -0.888  | 5.00E-05 | 0.00032 | -1.3893 | 5.00E-05 | 0.00038 |
| <b>Me1</b>           | -0.8881 | 5.00E-05 | 0.00032 | -0.9161 | 0.00875  | 0.03061 |
| <b>Hoxc4</b>         | -0.8902 | 0.0108   | 0.03234 | -1.3856 | 0.00115  | 0.00578 |
| <b>Evi5l</b>         | -0.8909 | 0.0032   | 0.01181 | -1.3473 | 0.00075  | 0.00405 |
| <b>Eef1e1</b>        | -0.891  | 0.00225  | 0.00883 | -1.2449 | 3.00E-04 | 0.00184 |
| <b>Copg2</b>         | -0.8912 | 0.0045   | 0.01571 | -1.0654 | 0.0048   | 0.01873 |
| <b>6030419C18Rik</b> | -0.8928 | 0.00575  | 0.0193  | -1.4205 | 4.00E-04 | 0.00237 |
| <b>Mtap</b>          | -0.8944 | 0.00035  | 0.00181 | -1.5691 | 5.00E-05 | 0.00038 |
| <b>Smpx</b>          | -0.8944 | 5.00E-05 | 0.00032 | -1.2685 | 3.00E-04 | 0.00184 |
| <b>Glo1</b>          | -0.8944 | 5.00E-05 | 0.00032 | -1.4685 | 5.00E-05 | 0.00038 |
| <b>Npr3</b>          | -0.8947 | 4.00E-04 | 0.00203 | -2.9521 | 5.00E-05 | 0.00038 |
| <b>Vwa1</b>          | -0.8961 | 0.00535  | 0.01818 | -1.3795 | 0.00095  | 0.00492 |
| <b>Mrps22</b>        | -0.8963 | 8.00E-04 | 0.00368 | -1.7261 | 5.00E-05 | 0.00038 |
| <b>Extl3</b>         | -0.8979 | 5.00E-05 | 0.00032 | -1.131  | 0.00045  | 0.00262 |
| <b>Oaz2</b>          | -0.8995 | 5.00E-05 | 0.00032 | -1.1853 | 1.00E-04 | 0.00072 |
| <b>0910001L09Rik</b> | -0.9008 | 5.00E-05 | 0.00032 | -0.9106 | 0.0031   | 0.01309 |
| <b>Cyb5r1</b>        | -0.9023 | 0.0011   | 0.00481 | -1.9845 | 5.00E-05 | 0.00038 |
| <b>Ifi2711</b>       | -0.9044 | 0.00295  | 0.01104 | -1.6044 | 5.00E-05 | 0.00038 |
| <b>Hccs</b>          | -0.9069 | 2.00E-04 | 0.00111 | -1.3141 | 0.00025  | 0.00159 |
| <b>Ggh</b>           | -0.9081 | 0.00545  | 0.01845 | -1.0552 | 0.0043   | 0.01712 |
| <b>Mri1</b>          | -0.9081 | 0.0118   | 0.03484 | -1.2577 | 0.0034   | 0.01416 |
| <b>Slc47a1</b>       | -0.9086 | 0.0017   | 0.00699 | -2.8623 | 5.00E-05 | 0.00038 |
| <b>I7Rn6</b>         | -0.9148 | 0.00045  | 0.00224 | -1.2465 | 3.00E-04 | 0.00184 |
| <b>Ulk2</b>          | -0.9168 | 5.00E-05 | 0.00032 | -1.8671 | 5.00E-05 | 0.00038 |
| <b>Zfp30</b>         | -0.9177 | 0.0053   | 0.01805 | -1.2322 | 8.00E-04 | 0.00427 |
| <b>Zfp449</b>        | -0.9179 | 0.01275  | 0.03713 | -1.7782 | 5.00E-05 | 0.00038 |
| <b>Grip2</b>         | -0.9211 | 0.01175  | 0.03471 | -1.8921 | 5.00E-05 | 0.00038 |
| <b>Stim1</b>         | -0.9221 | 5.00E-05 | 0.00032 | -1.1238 | 0.0011   | 0.00557 |

|                      |         |          |         |         |          |         |
|----------------------|---------|----------|---------|---------|----------|---------|
| <b>Hrasls</b>        | -0.9222 | 0.00105  | 0.00462 | -2.6726 | 5.00E-05 | 0.00038 |
| <b>Cacna2d1</b>      | -0.9256 | 5.00E-05 | 0.00032 | -1.2692 | 0.00075  | 0.00405 |
| <b>Nedd1</b>         | -0.9262 | 0.00045  | 0.00224 | -1.1603 | 5.00E-04 | 0.00287 |
| <b>Slc26a2</b>       | -0.9275 | 7.00E-04 | 0.00328 | -0.9472 | 0.00405  | 0.01634 |
| <b>Jkamp</b>         | -0.9278 | 0.0025   | 0.00962 | -1.3611 | 5.00E-05 | 0.00038 |
| <b>Arhgef6</b>       | -0.9282 | 0.00175  | 0.00715 | -2.3604 | 5.00E-05 | 0.00038 |
| <b>Rgmb</b>          | -0.9299 | 5.00E-05 | 0.00032 | -1.3558 | 5.00E-05 | 0.00038 |
| <b>Ccdc109a</b>      | -0.9304 | 1.00E-04 | 0.0006  | -1.244  | 5.00E-05 | 0.00038 |
| <b>Hipk4</b>         | -0.9304 | 0.00885  | 0.02757 | -1.0622 | 0.01625  | 0.05    |
| <b>Asb10</b>         | -0.9308 | 5.00E-05 | 0.00032 | -1.7531 | 5.00E-05 | 0.00038 |
| <b>4632428C04Rik</b> | -0.9319 | 0.01465  | 0.04155 | -2.4351 | 0.00055  | 0.00312 |
| <b>Rps6ka5</b>       | -0.9319 | 2.00E-04 | 0.00111 | -0.9501 | 0.0039   | 0.01589 |
| <b>Cyp2u1</b>        | -0.9322 | 0.01775  | 0.0485  | -2.1914 | 5.00E-04 | 0.00287 |
| <b>Lrp11</b>         | -0.9328 | 0.01645  | 0.04567 | -1.8645 | 2.00E-04 | 0.00131 |
| <b>Eif4e</b>         | -0.9332 | 5.00E-05 | 0.00032 | -1.6813 | 5.00E-05 | 0.00038 |
| <b>Rpia</b>          | -0.9347 | 8.00E-04 | 0.00368 | -1.4272 | 1.00E-04 | 0.00072 |
| <b>Rbbp5</b>         | -0.9352 | 1.00E-04 | 0.0006  | -1.3726 | 5.00E-05 | 0.00038 |
| <b>Gm13010</b>       | -0.9359 | 0.0174   | 0.04775 | -1.5325 | 0.00045  | 0.00262 |
| <b>N6amt2</b>        | -0.9369 | 0.00115  | 0.005   | -1.32   | 5.00E-05 | 0.00038 |
| <b>Cetn2</b>         | -0.937  | 0.00015  | 0.00086 | -1.7867 | 5.00E-05 | 0.00038 |
| <b>Ankrd28</b>       | -0.937  | 5.00E-05 | 0.00032 | -0.7963 | 0.01015  | 0.03445 |
| <b>Tmod2</b>         | -0.9373 | 0.0078   | 0.02484 | -1.192  | 0.0043   | 0.01712 |
| <b>Plekhb2</b>       | -0.9381 | 5.00E-05 | 0.00032 | -1.6412 | 5.00E-05 | 0.00038 |
| <b>6330408A02Rik</b> | -0.9422 | 4.00E-04 | 0.00203 | -1.1341 | 0.0125   | 0.04075 |
| <b>Jak2</b>          | -0.9426 | 5.00E-05 | 0.00032 | -1.0848 | 8.00E-04 | 0.00427 |
| <b>Myh13</b>         | -0.9429 | 0.0012   | 0.00518 | 3.52997 | 5.00E-05 | 0.00038 |
| <b>Entpd4</b>        | -0.9432 | 0.0037   | 0.01329 | -1.8745 | 0.0014   | 0.00681 |
| <b>Ppp2r4</b>        | -0.9445 | 0.0014   | 0.00591 | -1.6358 | 5.00E-05 | 0.00038 |
| <b>Tmod4</b>         | -0.9477 | 0.0116   | 0.0344  | -2.1525 | 5.00E-05 | 0.00038 |
| <b>Oxr1</b>          | -0.9489 | 5.00E-05 | 0.00032 | -1.1271 | 0.001    | 0.00513 |
| <b>Actr6</b>         | -0.9492 | 0.00545  | 0.01845 | -1.7107 | 1.00E-04 | 0.00072 |
| <b>Coq7</b>          | -0.9496 | 5.00E-05 | 0.00032 | -2.7068 | 5.00E-05 | 0.00038 |
| <b>Arhgef25</b>      | -0.9508 | 0.00025  | 0.00135 | -1.0311 | 0.00235  | 0.01046 |
| <b>Ksr1</b>          | -0.9516 | 5.00E-05 | 0.00032 | -2.3684 | 5.00E-05 | 0.00038 |
| <b>Klhl29</b>        | -0.9524 | 0.00655  | 0.02155 | -1.2286 | 0.00315  | 0.01327 |
| <b>Rprd1a</b>        | -0.9532 | 1.00E-04 | 0.0006  | -0.932  | 0.0024   | 0.01064 |
| <b>Wdyhv1</b>        | -0.9541 | 0.0074   | 0.02377 | -1.4026 | 1.00E-04 | 0.00072 |
| <b>Lrrc40</b>        | -0.9544 | 0.00585  | 0.01959 | -1.0035 | 0.0138   | 0.04415 |
| <b>Lage3</b>         | -0.9554 | 3.00E-04 | 0.00158 | -1.5525 | 5.00E-05 | 0.00038 |
| <b>Mthfd1</b>        | -0.9556 | 5.00E-05 | 0.00032 | -1.1035 | 0.00025  | 0.00159 |
| <b>Col5a2</b>        | -0.956  | 0.01235  | 0.0362  | -2.6955 | 5.00E-05 | 0.00038 |

|                 |         |          |         |         |          |         |
|-----------------|---------|----------|---------|---------|----------|---------|
| <b>Kctd11</b>   | -0.9579 | 0.014    | 0.04004 | -1.4553 | 8.00E-04 | 0.00427 |
| <b>Fam125b</b>  | -0.9596 | 0.0011   | 0.00481 | -0.9153 | 0.0088   | 0.03076 |
| <b>Kank2</b>    | -0.9628 | 5.00E-05 | 0.00032 | -0.7767 | 0.0112   | 0.0373  |
| <b>Phkb</b>     | -0.9633 | 5.00E-05 | 0.00032 | -1.9366 | 5.00E-05 | 0.00038 |
| <b>Hes1</b>     | -0.9647 | 0.00115  | 0.005   | -0.9615 | 0.00535  | 0.0204  |
| <b>Ifngr2</b>   | -0.9652 | 0.00485  | 0.01675 | -1.9277 | 0.00015  | 0.00102 |
| <b>Cuedc1</b>   | -0.9654 | 0.00505  | 0.01733 | -1.0106 | 0.0079   | 0.0282  |
| <b>Eif2c1</b>   | -0.9685 | 0.00175  | 0.00715 | -0.801  | 0.0116   | 0.03839 |
| <b>Fundc1</b>   | -0.969  | 1.00E-04 | 0.0006  | -1.3807 | 5.00E-05 | 0.00038 |
| <b>Myf6</b>     | -0.9703 | 5.00E-05 | 0.00032 | -2.2161 | 5.00E-05 | 0.00038 |
| <b>Cryz</b>     | -0.9721 | 0.00015  | 0.00086 | -1.0255 | 0.00235  | 0.01046 |
| <b>Dhodh</b>    | -0.9725 | 0.01605  | 0.04479 | -1.4539 | 0.0015   | 0.00723 |
| <b>Rfc2</b>     | -0.9727 | 6.00E-04 | 0.00286 | -0.9544 | 0.0057   | 0.0215  |
| <b>Pfkm</b>     | -0.9752 | 5.00E-05 | 0.00032 | -1.8696 | 0.00255  | 0.01114 |
| <b>Slc9a6</b>   | -0.9766 | 5.00E-05 | 0.00032 | -1.382  | 5.00E-05 | 0.00038 |
| <b>Pdss2</b>    | -0.9767 | 0.00075  | 0.00349 | -2.1552 | 5.00E-05 | 0.00038 |
| <b>Zfp161</b>   | -0.9778 | 3.00E-04 | 0.00158 | -0.9785 | 0.0025   | 0.011   |
| <b>BC023829</b> | -0.9778 | 0.00145  | 0.0061  | -1.6709 | 0.00025  | 0.00159 |
| <b>Cenpj</b>    | -0.9816 | 0.01575  | 0.04411 | -1.6072 | 0.0013   | 0.00641 |
| <b>Gm4631</b>   | -0.9861 | 5.00E-05 | 0.00032 | -2.2558 | 5.00E-05 | 0.00038 |
| <b>Gga2</b>     | -0.9863 | 0.00025  | 0.00135 | -1.4139 | 5.00E-05 | 0.00038 |
| <b>Rp2h</b>     | -0.9872 | 0.0013   | 0.00554 | -1.1671 | 0.0014   | 0.00681 |
| <b>Gpm6b</b>    | -0.9886 | 0.0027   | 0.01026 | -1.7494 | 5.00E-05 | 0.00038 |
| <b>Tmem177</b>  | -0.989  | 1.00E-04 | 0.0006  | -1.4886 | 5.00E-05 | 0.00038 |
| <b>Dynll1</b>   | -0.9911 | 0.00535  | 0.01818 | -1.6568 | 5.00E-05 | 0.00038 |
| <b>B3galnt2</b> | -0.9912 | 3.00E-04 | 0.00158 | -1.8466 | 0.0021   | 0.00957 |
| <b>Rnf5</b>     | -0.9923 | 0.00295  | 0.01104 | -1.2508 | 7.00E-04 | 0.00383 |
| <b>Plcl2</b>    | -0.9926 | 5.00E-05 | 0.00032 | -1.4957 | 5.00E-05 | 0.00038 |
| <b>Odz3</b>     | -0.994  | 0.00025  | 0.00135 | -1.1706 | 0.0018   | 0.00842 |
| <b>F3</b>       | -0.9961 | 0.0075   | 0.02403 | -1.5273 | 1.00E-04 | 0.00072 |
| <b>Rcl1</b>     | -0.9965 | 0.00045  | 0.00224 | -0.856  | 0.0113   | 0.03759 |
| <b>Gm5595</b>   | -0.997  | 0.0112   | 0.03333 | -0.9345 | 0.0138   | 0.04415 |
| <b>Tmem100</b>  | -0.9973 | 0.00015  | 0.00086 | -2.2903 | 5.00E-05 | 0.00038 |
| <b>Aarsd1</b>   | -0.9993 | 0.00125  | 0.00536 | -1.9862 | 5.00E-05 | 0.00038 |
| <b>Srl</b>      | -1.0015 | 8.00E-04 | 0.00368 | -1.829  | 5.00E-05 | 0.00038 |
| <b>Arhgap20</b> | -1.0023 | 5.00E-05 | 0.00032 | -1.7782 | 5.00E-05 | 0.00038 |
| <b>Tmem126b</b> | -1.0035 | 5.00E-05 | 0.00032 | -1.9971 | 5.00E-05 | 0.00038 |
| <b>Rcsd1</b>    | -1.0052 | 5.00E-05 | 0.00032 | -0.9399 | 0.00435  | 0.01729 |
| <b>Phldb2</b>   | -1.0088 | 0.00915  | 0.02835 | -1.3143 | 0.00385  | 0.01572 |
| <b>Tmem126a</b> | -1.0098 | 5.00E-05 | 0.00032 | -1.5405 | 5.00E-05 | 0.00038 |
| <b>Cnih</b>     | -1.0115 | 5.00E-05 | 0.00032 | -1.0381 | 7.00E-04 | 0.00383 |

|                      |         |          |         |         |          |         |
|----------------------|---------|----------|---------|---------|----------|---------|
| <b>5730419I09Rik</b> | -1.0146 | 5.00E-04 | 0.00244 | -1.41   | 5.00E-05 | 0.00038 |
| <b>Tmem55a</b>       | -1.0147 | 5.00E-05 | 0.00032 | -1.5079 | 5.00E-05 | 0.00038 |
| <b>Efr3b</b>         | -1.0207 | 0.00125  | 0.00536 | -1.3006 | 1.00E-04 | 0.00072 |
| <b>Fam189a2</b>      | -1.022  | 5.00E-05 | 0.00032 | -1.1228 | 0.00045  | 0.00262 |
| <b>Dock4</b>         | -1.0243 | 1.00E-04 | 0.0006  | -1.1546 | 0.00045  | 0.00262 |
| <b>6030419C18Rik</b> | -1.0248 | 0.00935  | 0.02885 | -2.076  | 5.00E-05 | 0.00038 |
| <b>Pam</b>           | -1.0258 | 3.00E-04 | 0.00158 | -0.9479 | 0.01165  | 0.03849 |
| <b>Galnt10</b>       | -1.0261 | 0.0017   | 0.00699 | -1.5588 | 1.00E-04 | 0.00072 |
| <b>Slc38a3</b>       | -1.0297 | 5.00E-05 | 0.00032 | -1.7837 | 5.00E-05 | 0.00038 |
| <b>Slc35d1</b>       | -1.0305 | 0.00015  | 0.00086 | -1.6297 | 5.00E-05 | 0.00038 |
| <b>Mlst8</b>         | -1.0318 | 0.00015  | 0.00086 | -1.7731 | 5.00E-05 | 0.00038 |
| <b>Mgat1</b>         | -1.0323 | 6.00E-04 | 0.00286 | -1.1071 | 0.00145  | 0.00702 |
| <b>1190007I07Rik</b> | -1.0328 | 0.0088   | 0.02744 | -1.6156 | 0.0013   | 0.00641 |
| <b>Tstd2</b>         | -1.0335 | 0.0023   | 0.00899 | -1.4358 | 0.01135  | 0.03772 |
| <b>1810055G02Rik</b> | -1.0335 | 0.0029   | 0.0109  | -1.0812 | 0.0033   | 0.01381 |
| <b>Ptgr2</b>         | -1.0339 | 0.00035  | 0.00181 | -1.7433 | 5.00E-05 | 0.00038 |
| <b>Serinc2</b>       | -1.0343 | 5.00E-05 | 0.00032 | -2.1334 | 5.00E-05 | 0.00038 |
| <b>Smarcd3</b>       | -1.0355 | 0.00165  | 0.00681 | -1.6308 | 5.00E-05 | 0.00038 |
| <b>Egf</b>           | -1.0363 | 5.00E-05 | 0.00032 | -2.6479 | 5.00E-05 | 0.00038 |
| <b>Rmnd1</b>         | -1.0377 | 0.0063   | 0.02089 | -1.1424 | 0.01325  | 0.04272 |
| <b>Rnf170</b>        | -1.0392 | 5.00E-05 | 0.00032 | -1.4886 | 5.00E-05 | 0.00038 |
| <b>Thap2</b>         | -1.0415 | 0.00295  | 0.01104 | -2.2022 | 5.00E-05 | 0.00038 |
| <b>Camk1</b>         | -1.043  | 0.00095  | 0.00425 | -1.7331 | 1.00E-04 | 0.00072 |
| <b>Snx32</b>         | -1.0497 | 0.00105  | 0.00462 | -1.493  | 4.00E-04 | 0.00237 |
| <b>Cacng6</b>        | -1.0501 | 5.00E-05 | 0.00032 | -1.8837 | 5.00E-05 | 0.00038 |
| <b>Tspan2</b>        | -1.0504 | 5.00E-04 | 0.00244 | -1.7874 | 5.00E-05 | 0.00038 |
| <b>Itpr1</b>         | -1.0509 | 0.00045  | 0.00224 | -0.9183 | 0.0156   | 0.04844 |
| <b>Ppl</b>           | -1.0517 | 0.00105  | 0.00462 | 0.99441 | 0.01015  | 0.03445 |
| <b>Zbtb4</b>         | -1.0519 | 0.00085  | 0.00387 | -1.3394 | 0.00015  | 0.00102 |
| <b>Trp53inp2</b>     | -1.0525 | 5.00E-05 | 0.00032 | -2.148  | 5.00E-05 | 0.00038 |
| <b>Tmem18</b>        | -1.0529 | 0.00045  | 0.00224 | -1.5049 | 5.00E-05 | 0.00038 |
| <b>Ifit2</b>         | -1.0559 | 0.0065   | 0.02141 | -1.3828 | 0.002    | 0.00918 |
| <b>Zfp191</b>        | -1.0581 | 2.00E-04 | 0.00111 | -1.4208 | 2.00E-04 | 0.00131 |
| <b>Nav2</b>          | -1.062  | 1.00E-04 | 0.0006  | -2.8073 | 5.00E-05 | 0.00038 |
| <b>Zranb3</b>        | -1.063  | 0.0039   | 0.0139  | -2.0406 | 5.00E-05 | 0.00038 |
| <b>Cars2</b>         | -1.0669 | 0.00025  | 0.00135 | -1.6672 | 5.00E-05 | 0.00038 |
| <b>2610507B11Rik</b> | -1.0684 | 5.00E-05 | 0.00032 | -1.1542 | 0.0043   | 0.01712 |
| <b>Mrps11</b>        | -1.0684 | 0.01175  | 0.03471 | -1.7384 | 0.0016   | 0.00763 |
| <b>Ufm1</b>          | -1.0687 | 0.01565  | 0.04387 | -1.2026 | 0.01495  | 0.04683 |
| <b>Ppic</b>          | -1.0714 | 5.00E-05 | 0.00032 | -1.6454 | 5.00E-05 | 0.00038 |
| <b>Lmnb2</b>         | -1.0725 | 0.013    | 0.03773 | -1.2529 | 0.00255  | 0.01114 |

|                      |         |          |         |         |          |         |
|----------------------|---------|----------|---------|---------|----------|---------|
| <b>Pmp22</b>         | -1.0729 | 0.00015  | 0.00086 | -0.7732 | 0.01015  | 0.03445 |
| <b>A930018M24Rik</b> | -1.0733 | 5.00E-05 | 0.00032 | -1.8658 | 5.00E-05 | 0.00038 |
| <b>Mast4</b>         | -1.0741 | 0.002    | 0.00799 | -1.2617 | 0.00405  | 0.01634 |
| <b>Pon3</b>          | -1.0753 | 3.00E-04 | 0.00158 | -2.0183 | 5.00E-05 | 0.00038 |
| <b>Pitpnc1</b>       | -1.076  | 0.00675  | 0.02206 | -3.0502 | 5.00E-05 | 0.00038 |
| <b>Sec61b</b>        | -1.0769 | 7.00E-04 | 0.00328 | -1.1611 | 0.0018   | 0.00842 |
| <b>Tob1</b>          | -1.0781 | 5.00E-05 | 0.00032 | -0.9453 | 0.0052   | 0.01999 |
| <b>Cul2</b>          | -1.0799 | 0.001    | 0.00445 | -1.1424 | 0.0015   | 0.00723 |
| <b>Slc9a5</b>        | -1.0799 | 0.0055   | 0.01859 | -0.9904 | 0.0157   | 0.0487  |
| <b>Npnt</b>          | -1.0823 | 0.00365  | 0.01315 | -2.5719 | 5.00E-05 | 0.00038 |
| <b>Ggcx</b>          | -1.0829 | 0.00635  | 0.02101 | -1.4868 | 0.00055  | 0.00312 |
| <b>Dnmt1</b>         | -1.0871 | 0.00015  | 0.00086 | -1.0801 | 0.00165  | 0.00782 |
| <b>1190002N15Rik</b> | -1.0872 | 0.00185  | 0.00749 | -1.4325 | 5.00E-05 | 0.00038 |
| <b>Trim68</b>        | -1.0892 | 0.00055  | 0.00266 | -0.8339 | 0.0139   | 0.04433 |
| <b>Pdgfra</b>        | -1.0908 | 5.00E-05 | 0.00032 | -1.1205 | 0.00045  | 0.00262 |
| <b>Wnt4</b>          | -1.0908 | 5.00E-05 | 0.00032 | -0.8986 | 0.0139   | 0.04433 |
| <b>Cobl</b>          | -1.0924 | 5.00E-05 | 0.00032 | -1.6831 | 5.00E-05 | 0.00038 |
| <b>Sdpr</b>          | -1.0924 | 5.00E-05 | 0.00032 | -1.5626 | 5.00E-05 | 0.00038 |
| <b>Fbxo17</b>        | -1.0927 | 0.01155  | 0.03429 | -2.6491 | 5.00E-05 | 0.00038 |
| <b>Zfhx2</b>         | -1.0945 | 0.0083   | 0.02615 | -1.1681 | 0.00095  | 0.00492 |
| <b>Tha1</b>          | -1.0968 | 0.00175  | 0.00715 | -1.8622 | 0.0022   | 0.00992 |
| <b>Ckb</b>           | -1.0975 | 0.00305  | 0.01133 | -1.6384 | 2.00E-04 | 0.00131 |
| <b>Klhl33</b>        | -1.0979 | 5.00E-05 | 0.00032 | -2.3208 | 5.00E-05 | 0.00038 |
| <b>Rnf122</b>        | -1.0981 | 0.00085  | 0.00387 | -1.268  | 9.00E-04 | 0.0047  |
| <b>Rbfox2</b>        | -1.0982 | 5.00E-05 | 0.00032 | -1.4552 | 5.00E-05 | 0.00038 |
| <b>Pdzrn3</b>        | -1.0983 | 5.00E-05 | 0.00032 | -1.2933 | 5.00E-05 | 0.00038 |
| <b>Hoxa9</b>         | -1.0984 | 0.00795  | 0.02525 | -1.5046 | 0.0022   | 0.00992 |
| <b>Xrcc2</b>         | -1.1002 | 0.00135  | 0.00572 | -1.493  | 2.00E-04 | 0.00131 |
| <b>Lman2l</b>        | -1.1002 | 5.00E-05 | 0.00032 | -1.5759 | 5.00E-05 | 0.00038 |
| <b>Blvra</b>         | -1.1004 | 0.00045  | 0.00224 | -0.9986 | 0.0055   | 0.02087 |
| <b>Pgap1</b>         | -1.1012 | 0.01595  | 0.04457 | -1.3026 | 0.0127   | 0.04123 |
| <b>A130010J15Rik</b> | -1.1017 | 0.01265  | 0.0369  | -1.8781 | 0.00325  | 0.01363 |
| <b>Snrpf</b>         | -1.1066 | 6.00E-04 | 0.00286 | -1.6664 | 5.00E-05 | 0.00038 |
| <b>Xpo1</b>          | -1.1077 | 5.00E-05 | 0.00032 | -0.9538 | 0.0019   | 0.0088  |
| <b>Atp1b1</b>        | -1.1077 | 5.00E-05 | 0.00032 | -1.4009 | 5.00E-05 | 0.00038 |
| <b>Crot</b>          | -1.1084 | 2.00E-04 | 0.00111 | -1.8532 | 5.00E-05 | 0.00038 |
| <b>Rnd3</b>          | -1.1103 | 0.00255  | 0.00979 | -1.7431 | 5.00E-05 | 0.00038 |
| <b>Adamts15</b>      | -1.1109 | 0.00085  | 0.00387 | -1.2965 | 0.00115  | 0.00578 |
| <b>Sparcl1</b>       | -1.111  | 5.00E-05 | 0.00032 | -1.0155 | 0.00235  | 0.01046 |
| <b>Trappc2</b>       | -1.1115 | 0.00925  | 0.0286  | -1.9738 | 0.0018   | 0.00842 |
| <b>Adal</b>          | -1.1122 | 0.00105  | 0.00462 | -2.1657 | 5.00E-05 | 0.00038 |



|                      |         |          |         |         |          |         |
|----------------------|---------|----------|---------|---------|----------|---------|
| <b>Cxcl12</b>        | -1.1138 | 5.00E-05 | 0.00032 | -1.3234 | 0.00105  | 0.00534 |
| <b>Satb1</b>         | -1.115  | 5.00E-05 | 0.00032 | -1.7777 | 5.00E-05 | 0.00038 |
| <b>Hoxa11</b>        | -1.1152 | 0.01405  | 0.04013 | -1.7958 | 0.0067   | 0.02457 |
| <b>Ppp1r14c</b>      | -1.1176 | 5.00E-05 | 0.00032 | -1.5146 | 5.00E-05 | 0.00038 |
| <b>Zfp280b</b>       | -1.1184 | 5.00E-05 | 0.00032 | -1.3223 | 5.00E-05 | 0.00038 |
| <b>Wrb</b>           | -1.1185 | 0.00085  | 0.00387 | -1.4587 | 0.00015  | 0.00102 |
| <b>Adk</b>           | -1.1191 | 5.00E-05 | 0.00032 | -1.6418 | 5.00E-05 | 0.00038 |
| <b>Tmcc2</b>         | -1.1199 | 5.00E-05 | 0.00032 | -1.1269 | 0.00025  | 0.00159 |
| <b>Tceal1</b>        | -1.1203 | 9.00E-04 | 0.00406 | -1.2815 | 0.00175  | 0.00822 |
| <b>MIh3</b>          | -1.122  | 0.00195  | 0.00782 | -1.3123 | 8.00E-04 | 0.00427 |
| <b>Col12a1</b>       | -1.1221 | 0.01055  | 0.0318  | -1.7001 | 0.00245  | 0.01083 |
| <b>Ankmy2</b>        | -1.1243 | 0.001    | 0.00445 | -1.0428 | 0.004    | 0.01623 |
| <b>Pwwp2b</b>        | -1.1266 | 0.0024   | 0.00929 | -1.1245 | 0.00635  | 0.02351 |
| <b>Haus6</b>         | -1.1281 | 9.00E-04 | 0.00406 | -1.1314 | 0.00155  | 0.00742 |
| <b>Sema3c</b>        | -1.1305 | 0.00015  | 0.00086 | -1.5564 | 5.00E-05 | 0.00038 |
| <b>Maob</b>          | -1.131  | 5.00E-05 | 0.00032 | -1.3406 | 2.00E-04 | 0.00131 |
| <b>Dab2</b>          | -1.1313 | 5.00E-04 | 0.00244 | -0.962  | 0.0155   | 0.04817 |
| <b>Hs2st1</b>        | -1.1321 | 5.00E-05 | 0.00032 | -0.8959 | 0.00465  | 0.01831 |
| <b>5730455P16Rik</b> | -1.1324 | 5.00E-05 | 0.00032 | -1.8962 | 5.00E-05 | 0.00038 |
| <b>Hhat1</b>         | -1.1329 | 5.00E-05 | 0.00032 | -2.0739 | 5.00E-05 | 0.00038 |
| <b>Fan1</b>          | -1.1332 | 2.00E-04 | 0.00111 | -1.4298 | 2.00E-04 | 0.00131 |
| <b>Dusp19</b>        | -1.1345 | 0.01095  | 0.03273 | -1.9405 | 0.00295  | 0.01259 |
| <b>Ddit4l</b>        | -1.1354 | 0.00035  | 0.00181 | -2.2401 | 5.00E-05 | 0.00038 |
| <b>Klhl25</b>        | -1.1354 | 0.00395  | 0.01405 | -1.3797 | 0.00115  | 0.00578 |
| <b>Gm4980</b>        | -1.1355 | 0.0023   | 0.00899 | -1.1727 | 0.00735  | 0.02658 |
| <b>Commd10</b>       | -1.1356 | 0.0024   | 0.00929 | -1.0048 | 0.00955  | 0.03291 |
| <b>Homer1</b>        | -1.1358 | 5.00E-05 | 0.00032 | -2.237  | 5.00E-05 | 0.00038 |
| <b>2310015B20Rik</b> | -1.1363 | 5.00E-05 | 0.00032 | -2.5393 | 5.00E-05 | 0.00038 |
| <b>Bmpr1a</b>        | -1.1375 | 5.00E-05 | 0.00032 | -1.5929 | 5.00E-05 | 0.00038 |
| <b>Col15a1</b>       | -1.1378 | 0.0036   | 0.01302 | -2.4644 | 5.00E-05 | 0.00038 |
| <b>Spry2</b>         | -1.138  | 5.00E-05 | 0.00032 | -1.0639 | 0.00195  | 0.00898 |
| <b>BC046404</b>      | -1.1397 | 0.00215  | 0.00849 | -0.9709 | 0.01485  | 0.04659 |
| <b>Prkab2</b>        | -1.1402 | 5.00E-05 | 0.00032 | -2.0404 | 5.00E-05 | 0.00038 |
| <b>Myo5c</b>         | -1.141  | 5.00E-05 | 0.00032 | -0.8882 | 0.00335  | 0.01398 |
| <b>Timm22</b>        | -1.1426 | 0.00305  | 0.01133 | -2.4135 | 5.00E-05 | 0.00038 |
| <b>Nck2</b>          | -1.1437 | 1.00E-04 | 0.0006  | -1.2828 | 0.00045  | 0.00262 |
| <b>Armxc3</b>        | -1.1439 | 5.00E-05 | 0.00032 | -1.9496 | 5.00E-05 | 0.00038 |
| <b>Abhd14a</b>       | -1.1452 | 0.00295  | 0.01104 | -1.0584 | 0.0054   | 0.02055 |
| <b>Rnpep</b>         | -1.1465 | 0.00775  | 0.02471 | -1.2688 | 0.00535  | 0.0204  |
| <b>Sh3rf2</b>        | -1.1491 | 5.00E-05 | 0.00032 | -0.9772 | 0.0021   | 0.00957 |
| <b>Zfp946</b>        | -1.15   | 0.0015   | 0.00627 | -1.0886 | 0.00415  | 0.01665 |

|               |         |          |         |         |          |         |
|---------------|---------|----------|---------|---------|----------|---------|
| Neil1         | -1.1504 | 0.001    | 0.00445 | -1.6278 | 0.00015  | 0.00102 |
| Setmar        | -1.1521 | 0.0034   | 0.01243 | -1.5757 | 0.0016   | 0.00763 |
| Cspg4         | -1.1533 | 0.00025  | 0.00135 | -1.2469 | 2.00E-04 | 0.00131 |
| Enpp4         | -1.154  | 5.00E-05 | 0.00032 | -1.5935 | 5.00E-05 | 0.00038 |
| Tpsb2         | -1.1542 | 0.00925  | 0.0286  | -2.6545 | 0.0015   | 0.00723 |
| Slc25a23      | -1.1559 | 0.0039   | 0.0139  | -1.7471 | 0.0021   | 0.00957 |
| Sfrp5         | -1.1574 | 1.00E-04 | 0.0006  | 1.0224  | 0.0057   | 0.0215  |
| Pdia4         | -1.1588 | 5.00E-05 | 0.00032 | -1.3802 | 1.00E-04 | 0.00072 |
| Gm17296       | -1.1594 | 0.00055  | 0.00266 | -1.9933 | 5.00E-05 | 0.00038 |
| Xirp2         | -1.1595 | 0.00305  | 0.01133 | -2.0229 | 0.0041   | 0.0165  |
| Parp1         | -1.1621 | 5.00E-05 | 0.00032 | -1.4493 | 5.00E-05 | 0.00038 |
| Ankdd1b       | -1.164  | 0.01525  | 0.04299 | -1.7747 | 0.0045   | 0.01782 |
| Tspan3        | -1.1645 | 5.00E-05 | 0.00032 | -1.8004 | 5.00E-05 | 0.00038 |
| Gatsl2        | -1.1699 | 5.00E-05 | 0.00032 | -3.1982 | 5.00E-05 | 0.00038 |
| Nr3c2         | -1.1711 | 4.00E-04 | 0.00203 | -1.0019 | 0.0035   | 0.01447 |
| Dkc1          | -1.1714 | 0.01475  | 0.04178 | -1.9834 | 0.00225  | 0.0101  |
| Zadh2         | -1.172  | 5.00E-05 | 0.00032 | -1.3277 | 5.00E-05 | 0.00038 |
| Mxra8         | -1.175  | 1.00E-04 | 0.0006  | -1.5775 | 5.00E-05 | 0.00038 |
| Ctso          | -1.1754 | 0.00045  | 0.00224 | -1.4628 | 5.00E-05 | 0.00038 |
| Rngtt         | -1.1755 | 2.00E-04 | 0.00111 | -1.2731 | 5.00E-05 | 0.00038 |
| Evc           | -1.1762 | 5.00E-05 | 0.00032 | -0.995  | 0.01145  | 0.03798 |
| Serping1      | -1.1773 | 5.00E-05 | 0.00032 | -0.8484 | 0.0054   | 0.02055 |
| Lmbr1         | -1.1776 | 0.00015  | 0.00086 | -1.5766 | 5.00E-05 | 0.00038 |
| Msrb3         | -1.1791 | 5.00E-05 | 0.00032 | -1.551  | 5.00E-05 | 0.00038 |
| Prrx1         | -1.1797 | 5.00E-05 | 0.00032 | -1.1423 | 5.00E-04 | 0.00287 |
| Jarid2        | -1.1823 | 0.00205  | 0.00814 | -0.9731 | 0.00585  | 0.02197 |
| Pkia          | -1.1838 | 5.00E-05 | 0.00032 | -2.5986 | 5.00E-05 | 0.00038 |
| 1700066M21Rik | -1.1856 | 0.0039   | 0.0139  | -1.2079 | 0.00525  | 0.02013 |
| Kptn          | -1.1861 | 0.00305  | 0.01133 | -1.6521 | 4.00E-04 | 0.00237 |
| Akr1e1        | -1.187  | 0.01555  | 0.04368 | -2.1902 | 0.0019   | 0.0088  |
| Tceal7        | -1.1887 | 0.0161   | 0.04489 | -2.916  | 0.01165  | 0.03849 |
| Ccnj          | -1.1891 | 4.00E-04 | 0.00203 | -1.2553 | 0.00075  | 0.00405 |
| Kcna7         | -1.1933 | 5.00E-05 | 0.00032 | -1.6473 | 5.00E-05 | 0.00038 |
| Zfp367        | -1.1937 | 0.00015  | 0.00086 | -1.5621 | 0.00055  | 0.00312 |
| Prmt2         | -1.1952 | 0.0045   | 0.01571 | -1.951  | 5.00E-05 | 0.00038 |
| Cpox          | -1.1969 | 5.00E-05 | 0.00032 | -1.8962 | 5.00E-05 | 0.00038 |
| Nexn          | -1.1994 | 5.00E-05 | 0.00032 | -2.3902 | 5.00E-05 | 0.00038 |
| Gpd2          | -1.2003 | 5.00E-05 | 0.00032 | -2.468  | 5.00E-05 | 0.00038 |
| Kctd21        | -1.2009 | 0.0019   | 0.00766 | -2.2554 | 1.00E-04 | 0.00072 |
| Pecr          | -1.201  | 1.00E-04 | 0.0006  | -1.9589 | 5.00E-05 | 0.00038 |
| Nmt2          | -1.2015 | 5.00E-05 | 0.00032 | -1.1091 | 6.00E-04 | 0.00335 |

|                      |         |          |         |         |          |         |
|----------------------|---------|----------|---------|---------|----------|---------|
| <b>Tecpr2</b>        | -1.2037 | 5.00E-05 | 0.00032 | -1.3381 | 1.00E-04 | 0.00072 |
| <b>Pknx2</b>         | -1.2053 | 5.00E-05 | 0.00032 | -1.4247 | 5.00E-05 | 0.00038 |
| <b>Plau</b>          | -1.206  | 5.00E-05 | 0.00032 | -1.0046 | 0.00115  | 0.00578 |
| <b>Snrpn</b>         | -1.2097 | 5.00E-05 | 0.00032 | -2.7321 | 5.00E-05 | 0.00038 |
| <b>Esr1</b>          | -1.2098 | 5.00E-05 | 0.00032 | -2.3165 | 5.00E-05 | 0.00038 |
| <b>Mlec</b>          | -1.2146 | 0.0059   | 0.01972 | -2.4143 | 5.00E-05 | 0.00038 |
| <b>Ccdc85b</b>       | -1.2153 | 5.00E-05 | 0.00032 | -0.7847 | 0.01185  | 0.03901 |
| <b>Trak1</b>         | -1.2158 | 5.00E-05 | 0.00032 | -1.5517 | 5.00E-05 | 0.00038 |
| <b>Man2a2</b>        | -1.217  | 5.00E-05 | 0.00032 | -1.6831 | 5.00E-05 | 0.00038 |
| <b>Fbxo25</b>        | -1.221  | 5.00E-05 | 0.00032 | -1.1473 | 0.00085  | 0.00449 |
| <b>Rpa3</b>          | -1.222  | 0.00415  | 0.01468 | -1.9359 | 1.00E-04 | 0.00072 |
| <b>Fam122b</b>       | -1.2228 | 0.0022   | 0.00865 | -1.0111 | 0.01025  | 0.0347  |
| <b>Ncapd2</b>        | -1.2235 | 0.00015  | 0.00086 | -1.6215 | 5.00E-05 | 0.00038 |
| <b>Uba6</b>          | -1.2242 | 0.0026   | 0.00995 | -1.3749 | 0.001    | 0.00513 |
| <b>3110056O03Rik</b> | -1.226  | 5.00E-05 | 0.00032 | -1.7801 | 5.00E-05 | 0.00038 |
| <b>Efs</b>           | -1.2272 | 0.0111   | 0.03307 | -1.667  | 0.0053   | 0.02027 |
| <b>Hspg2</b>         | -1.2281 | 0.01825  | 0.04962 | -1.9023 | 0.00955  | 0.03291 |
| <b>Mageh1</b>        | -1.2281 | 0.0026   | 0.00995 | -1.2575 | 0.00415  | 0.01665 |
| <b>Pik3c2b</b>       | -1.2292 | 5.00E-05 | 0.00032 | -2.1082 | 5.00E-05 | 0.00038 |
| <b>Zfp799</b>        | -1.2298 | 0.0046   | 0.016   | -1.9565 | 7.00E-04 | 0.00383 |
| <b>Matn2</b>         | -1.2352 | 0.00015  | 0.00086 | -2.1091 | 5.00E-05 | 0.00038 |
| <b>Prkcz</b>         | -1.2358 | 0.0125   | 0.03659 | 2.00671 | 5.00E-05 | 0.00038 |
| <b>D4Bwg0951e</b>    | -1.2368 | 0.0098   | 0.02992 | -1.6621 | 0.001    | 0.00513 |
| <b>Hps5</b>          | -1.2376 | 0.00975  | 0.02984 | -1.4014 | 0.00385  | 0.01572 |
| <b>Atp8a1</b>        | -1.2409 | 5.00E-05 | 0.00032 | -1.4058 | 5.00E-05 | 0.00038 |
| <b>Gsn</b>           | -1.2412 | 5.00E-05 | 0.00032 | -1.2963 | 8.00E-04 | 0.00427 |
| <b>Car3</b>          | -1.2459 | 5.00E-05 | 0.00032 | -2.3665 | 5.00E-05 | 0.00038 |
| <b>Wdr5b</b>         | -1.246  | 0.00265  | 0.01011 | -1.4279 | 0.00265  | 0.01149 |
| <b>Mylpf</b>         | -1.2464 | 0.00175  | 0.00715 | -2.0897 | 0.00195  | 0.00898 |
| <b>Hs3st5</b>        | -1.2497 | 0.00025  | 0.00135 | -3.2092 | 5.00E-05 | 0.00038 |
| <b>Ntrk2</b>         | -1.2535 | 3.00E-04 | 0.00158 | -1.5254 | 0.00015  | 0.00102 |
| <b>Ccbl1</b>         | -1.2535 | 5.00E-05 | 0.00032 | -0.9578 | 0.0039   | 0.01589 |
| <b>Kif3c</b>         | -1.254  | 5.00E-05 | 0.00032 | -1.6233 | 5.00E-05 | 0.00038 |
| <b>Xaf1</b>          | -1.2552 | 0.002    | 0.00799 | -1.4171 | 0.0139   | 0.04433 |
| <b>Epb4.1l4a</b>     | -1.2553 | 0.00075  | 0.00349 | -1.0178 | 0.0084   | 0.0296  |
| <b>Clasp1</b>        | -1.2567 | 5.00E-05 | 0.00032 | -1.4475 | 5.00E-05 | 0.00038 |
| <b>Mtap6</b>         | -1.2611 | 0.0024   | 0.00929 | -1.1564 | 0.00985  | 0.03368 |
| <b>Magix</b>         | -1.2633 | 5.00E-05 | 0.00032 | -1.3243 | 5.00E-05 | 0.00038 |
| <b>Ltbp4</b>         | -1.2644 | 0.004    | 0.01419 | -1.791  | 0.0023   | 0.01029 |
| <b>Nova1</b>         | -1.2656 | 0.00025  | 0.00135 | -1.3807 | 5.00E-04 | 0.00287 |
| <b>Stat1</b>         | -1.2672 | 5.00E-05 | 0.00032 | -1.6814 | 5.00E-05 | 0.00038 |

|                      |         |          |         |         |          |         |
|----------------------|---------|----------|---------|---------|----------|---------|
| <b>Ston2</b>         | -1.2673 | 0.0023   | 0.00899 | -2.5277 | 5.00E-05 | 0.00038 |
| <b>Fkbp9</b>         | -1.2695 | 5.00E-05 | 0.00032 | -1.3791 | 5.00E-05 | 0.00038 |
| <b>Zik1</b>          | -1.2765 | 0.01375  | 0.03947 | -1.8604 | 0.0018   | 0.00842 |
| <b>Smtn</b>          | -1.2802 | 5.00E-05 | 0.00032 | -1.5488 | 0.00085  | 0.00449 |
| <b>Dffa</b>          | -1.2816 | 5.00E-05 | 0.00032 | -2.0026 | 5.00E-05 | 0.00038 |
| <b>Gm16039</b>       | -1.2834 | 0.00065  | 0.00308 | -1.7344 | 0.00075  | 0.00405 |
| <b>Hrsp12</b>        | -1.2855 | 0.00795  | 0.02525 | -2.2884 | 1.00E-04 | 0.00072 |
| <b>Akr1b10</b>       | -1.2859 | 5.00E-05 | 0.00032 | -1.7787 | 5.00E-05 | 0.00038 |
| <b>Slc9a2</b>        | -1.286  | 5.00E-05 | 0.00032 | -1.1263 | 2.00E-04 | 0.00131 |
| <b>Akap6</b>         | -1.2862 | 5.00E-05 | 0.00032 | -3.4311 | 5.00E-05 | 0.00038 |
| <b>Myadm</b>         | -1.2885 | 5.00E-05 | 0.00032 | -1.6168 | 5.00E-05 | 0.00038 |
| <b>Lgals3bp</b>      | -1.2886 | 0.00195  | 0.00782 | -1.5475 | 0.00135  | 0.00662 |
| <b>Smad6</b>         | -1.2896 | 5.00E-05 | 0.00032 | -1.2685 | 0.00055  | 0.00312 |
| <b>Naa50</b>         | -1.2899 | 5.00E-05 | 0.00032 | -1.3202 | 2.00E-04 | 0.00131 |
| <b>2310046A06Rik</b> | -1.2903 | 5.00E-05 | 0.00032 | -2.5406 | 5.00E-05 | 0.00038 |
| <b>Gltpd1</b>        | -1.293  | 0.00205  | 0.00814 | -2.3366 | 5.00E-05 | 0.00038 |
| <b>Sdc2</b>          | -1.2933 | 5.00E-05 | 0.00032 | -1.7805 | 5.00E-05 | 0.00038 |
| <b>Mpz</b>           | -1.2949 | 5.00E-05 | 0.00032 | -1.0802 | 7.00E-04 | 0.00383 |
| <b>Wbscr17</b>       | -1.2957 | 5.00E-05 | 0.00032 | -1.1939 | 0.00265  | 0.01149 |
| <b>2610021A01Rik</b> | -1.2962 | 2.00E-04 | 0.00111 | -1.8574 | 5.00E-05 | 0.00038 |
| <b>Rtp4</b>          | -1.2976 | 0.0047   | 0.01629 | -1.4817 | 0.00275  | 0.01187 |
| <b>Plxna1</b>        | -1.2998 | 5.00E-05 | 0.00032 | -1.2186 | 5.00E-05 | 0.00038 |
| <b>Zfp141</b>        | -1.3024 | 0.00065  | 0.00308 | -1.1806 | 0.00405  | 0.01634 |
| <b>Tmem206</b>       | -1.3026 | 0.0088   | 0.02744 | -1.2816 | 0.0124   | 0.04046 |
| <b>Slc25a37</b>      | -1.3066 | 5.00E-05 | 0.00032 | -0.8386 | 0.00835  | 0.02947 |
| <b>Msh2</b>          | -1.3097 | 0.00025  | 0.00135 | -1.2886 | 0.0128   | 0.04148 |
| <b>Myct1</b>         | -1.3107 | 1.00E-04 | 0.0006  | -1.0137 | 0.00285  | 0.01222 |
| <b>Tspan33</b>       | -1.3112 | 0.00205  | 0.00814 | -1.5775 | 2.00E-04 | 0.00131 |
| <b>Ntng2</b>         | -1.3132 | 0.0053   | 0.01805 | -1.6215 | 0.00185  | 0.00861 |
| <b>Il12rb2</b>       | -1.3142 | 0.00015  | 0.00086 | -3.0869 | 5.00E-05 | 0.00038 |
| <b>Serpinh1</b>      | -1.3142 | 5.00E-05 | 0.00032 | -2.3201 | 5.00E-05 | 0.00038 |
| <b>1810063B05Rik</b> | -1.315  | 5.00E-05 | 0.00032 | -2.0428 | 5.00E-05 | 0.00038 |
| <b>Tmod1</b>         | -1.3158 | 0.0079   | 0.02512 | -1.7708 | 0.0058   | 0.02182 |
| <b>0610037P05Rik</b> | -1.3165 | 5.00E-05 | 0.00032 | -2.1288 | 5.00E-05 | 0.00038 |
| <b>Anxa1</b>         | -1.319  | 0.01485  | 0.04201 | 1.76955 | 0.00075  | 0.00405 |
| <b>2810006K23Rik</b> | -1.3211 | 5.00E-05 | 0.00032 | -1.7593 | 5.00E-05 | 0.00038 |
| <b>2310003L22Rik</b> | -1.3218 | 5.00E-05 | 0.00032 | -1.9197 | 5.00E-05 | 0.00038 |
| <b>Taco1</b>         | -1.3231 | 5.00E-05 | 0.00032 | -2.5537 | 5.00E-05 | 0.00038 |
| <b>Laptm4b</b>       | -1.3234 | 5.00E-05 | 0.00032 | -1.4007 | 5.00E-05 | 0.00038 |
| <b>Gm7120</b>        | -1.3245 | 0.00025  | 0.00135 | -1.5376 | 0.00025  | 0.00159 |
| <b>Fam57b</b>        | -1.3248 | 5.00E-05 | 0.00032 | -2.4735 | 5.00E-05 | 0.00038 |

|                      |         |          |         |         |          |         |
|----------------------|---------|----------|---------|---------|----------|---------|
| <b>Dnmt3a</b>        | -1.3253 | 5.00E-05 | 0.00032 | -1.8964 | 5.00E-05 | 0.00038 |
| <b>Stim2</b>         | -1.3255 | 0.00015  | 0.00086 | -0.8859 | 0.01465  | 0.04609 |
| <b>Etaa1</b>         | -1.3294 | 0.00425  | 0.01498 | -1.2275 | 0.007    | 0.02553 |
| <b>Ranbp6</b>        | -1.3306 | 5.00E-05 | 0.00032 | -1.6805 | 5.00E-05 | 0.00038 |
| <b>Gm12247</b>       | -1.331  | 0.0134   | 0.03863 | -1.9236 | 0.0038   | 0.01556 |
| <b>Cby1</b>          | -1.332  | 1.00E-04 | 0.0006  | -2.2038 | 5.00E-05 | 0.00038 |
| <b>Zfp248</b>        | -1.3325 | 0.01255  | 0.03669 | -1.7935 | 0.0063   | 0.02337 |
| <b>Cenpc1</b>        | -1.3345 | 0.00055  | 0.00266 | -1.5343 | 8.00E-04 | 0.00427 |
| <b>Ghr</b>           | -1.3358 | 5.00E-05 | 0.00032 | -1.031  | 0.00695  | 0.02537 |
| <b>C1qc</b>          | -1.3364 | 0.00025  | 0.00135 | -0.9986 | 0.0103   | 0.03481 |
| <b>Enpp5</b>         | -1.3367 | 5.00E-05 | 0.00032 | -1.147  | 0.00055  | 0.00312 |
| <b>Aldh1l2</b>       | -1.3394 | 1.00E-04 | 0.0006  | -2.3511 | 5.00E-05 | 0.00038 |
| <b>Zfp11</b>         | -1.3397 | 0.00085  | 0.00387 | -1.7892 | 0.00015  | 0.00102 |
| <b>Bmp1</b>          | -1.3407 | 0.00045  | 0.00224 | -1.7735 | 2.00E-04 | 0.00131 |
| <b>Trmt12</b>        | -1.3407 | 1.00E-04 | 0.0006  | -1.4194 | 5.00E-05 | 0.00038 |
| <b>Aqp7</b>          | -1.3427 | 0.0019   | 0.00766 | -2.4383 | 5.00E-05 | 0.00038 |
| <b>Gm12655</b>       | -1.3437 | 0.0087   | 0.02717 | -1.8334 | 0.00185  | 0.00861 |
| <b>Akap17b</b>       | -1.3452 | 9.00E-04 | 0.00406 | -1.2755 | 0.00405  | 0.01634 |
| <b>Ccnd2</b>         | -1.3482 | 1.00E-04 | 0.0006  | -2.8628 | 5.00E-05 | 0.00038 |
| <b>P4ha1</b>         | -1.3487 | 5.00E-05 | 0.00032 | -1.8944 | 5.00E-05 | 0.00038 |
| <b>Fdps</b>          | -1.3489 | 5.00E-05 | 0.00032 | -2.1055 | 5.00E-05 | 0.00038 |
| <b>Myl1</b>          | -1.3497 | 5.00E-05 | 0.00032 | -2.3612 | 0.00015  | 0.00102 |
| <b>Inpp1</b>         | -1.3511 | 5.00E-05 | 0.00032 | -1.5786 | 5.00E-05 | 0.00038 |
| <b>Clu</b>           | -1.3527 | 5.00E-05 | 0.00032 | -0.9221 | 0.00325  | 0.01363 |
| <b>4930572J05Rik</b> | -1.3539 | 5.00E-05 | 0.00032 | -2.2685 | 5.00E-05 | 0.00038 |
| <b>Fktn</b>          | -1.3594 | 5.00E-05 | 0.00032 | -1.8301 | 5.00E-05 | 0.00038 |
| <b>Zfp759</b>        | -1.3604 | 0.00055  | 0.00266 | -3.0695 | 5.00E-05 | 0.00038 |
| <b>Abcc5</b>         | -1.3615 | 0.0011   | 0.00481 | -1.9208 | 5.00E-05 | 0.00038 |
| <b>Ttll12</b>        | -1.3641 | 0.00155  | 0.00645 | -1.9786 | 5.00E-05 | 0.00038 |
| <b>Epdr1</b>         | -1.3663 | 5.00E-05 | 0.00032 | -1.9383 | 5.00E-05 | 0.00038 |
| <b>Pkm2</b>          | -1.367  | 5.00E-05 | 0.00032 | -1.8114 | 0.00105  | 0.00534 |
| <b>Ptpn3</b>         | -1.3673 | 5.00E-05 | 0.00032 | -1.6181 | 0.00015  | 0.00102 |
| <b>Prima1</b>        | -1.3707 | 0.00015  | 0.00086 | -2.7094 | 5.00E-05 | 0.00038 |
| <b>Atg4c</b>         | -1.3727 | 5.00E-05 | 0.00032 | -1.986  | 5.00E-05 | 0.00038 |
| <b>Igdcc4</b>        | -1.3736 | 5.00E-05 | 0.00032 | -2.6142 | 5.00E-05 | 0.00038 |
| <b>1810020D17Rik</b> | -1.3749 | 5.00E-05 | 0.00032 | -2.2799 | 5.00E-05 | 0.00038 |
| <b>Trim13</b>        | -1.3774 | 5.00E-05 | 0.00032 | -2.1212 | 5.00E-05 | 0.00038 |
| <b>Rab3il1</b>       | -1.3793 | 0.00035  | 0.00181 | -1.556  | 0.00015  | 0.00102 |
| <b>Acvr1</b>         | -1.3797 | 5.00E-05 | 0.00032 | -1.6146 | 5.00E-05 | 0.00038 |
| <b>Setd8</b>         | -1.3816 | 5.00E-05 | 0.00032 | -1.3475 | 2.00E-04 | 0.00131 |
| <b>Stbd1</b>         | -1.384  | 5.00E-05 | 0.00032 | -3.346  | 5.00E-05 | 0.00038 |

|                      |         |          |         |         |          |         |
|----------------------|---------|----------|---------|---------|----------|---------|
| <b>Hp</b>            | -1.3844 | 5.00E-05 | 0.00032 | 4.48591 | 5.00E-05 | 0.00038 |
| <b>Nupr1</b>         | -1.3874 | 0.0013   | 0.00554 | -1.7299 | 0.00045  | 0.00262 |
| <b>Dhcr24</b>        | -1.3883 | 0.00035  | 0.00181 | -2.8172 | 5.00E-05 | 0.00038 |
| <b>Tmem64</b>        | -1.3893 | 5.00E-05 | 0.00032 | -1.6064 | 5.00E-05 | 0.00038 |
| <b>Add3</b>          | -1.3912 | 5.00E-05 | 0.00032 | -0.7373 | 0.01445  | 0.04566 |
| <b>Sac3d1</b>        | -1.3929 | 5.00E-05 | 0.00032 | -1.0072 | 0.005    | 0.01934 |
| <b>Mmab</b>          | -1.3933 | 5.00E-05 | 0.00032 | -2.1037 | 5.00E-05 | 0.00038 |
| <b>Kbtbd8</b>        | -1.3981 | 0.00515  | 0.01761 | -2.3498 | 5.00E-05 | 0.00038 |
| <b>Zfp651</b>        | -1.3983 | 5.00E-05 | 0.00032 | -1.8951 | 5.00E-05 | 0.00038 |
| <b>Dtymk</b>         | -1.3993 | 1.00E-04 | 0.0006  | -1.2538 | 0.0013   | 0.00641 |
| <b>Slc16a3</b>       | -1.4012 | 0.0024   | 0.00929 | -4.0394 | 0.0024   | 0.01064 |
| <b>Ldoc1l</b>        | -1.4047 | 1.00E-04 | 0.0006  | -2.7174 | 5.00E-05 | 0.00038 |
| <b>Ssbp2</b>         | -1.4077 | 5.00E-05 | 0.00032 | -0.9748 | 0.0095   | 0.03279 |
| <b>Zswim3</b>        | -1.408  | 0.0057   | 0.01917 | -1.1887 | 0.0102   | 0.03456 |
| <b>Mapk14</b>        | -1.4087 | 5.00E-05 | 0.00032 | -2.0285 | 5.00E-05 | 0.00038 |
| <b>Capn3</b>         | -1.4098 | 1.00E-04 | 0.0006  | -3.0838 | 5.00E-05 | 0.00038 |
| <b>Col22a1</b>       | -1.4101 | 5.00E-05 | 0.00032 | -3.1918 | 5.00E-05 | 0.00038 |
| <b>3110052M02Rik</b> | -1.4118 | 0.0139   | 0.03982 | -1.7426 | 0.0012   | 0.006   |
| <b>Cib2</b>          | -1.4119 | 5.00E-05 | 0.00032 | -2.1095 | 5.00E-05 | 0.00038 |
| <b>Csf1</b>          | -1.4137 | 5.00E-05 | 0.00032 | -1.34   | 2.00E-04 | 0.00131 |
| <b>Shc2</b>          | -1.4169 | 0.0013   | 0.00554 | -1.5978 | 0.0012   | 0.006   |
| <b>Neu3</b>          | -1.4187 | 5.00E-05 | 0.00032 | -2.434  | 5.00E-05 | 0.00038 |
| <b>Heatr5a</b>       | -1.4192 | 5.00E-05 | 0.00032 | -1.4267 | 5.00E-05 | 0.00038 |
| <b>Kcnc1</b>         | -1.4197 | 5.00E-05 | 0.00032 | -1.4269 | 2.00E-04 | 0.00131 |
| <b>Padi2</b>         | -1.42   | 1.00E-04 | 0.0006  | -2.031  | 0.00075  | 0.00405 |
| <b>Hfe2</b>          | -1.4246 | 5.00E-05 | 0.00032 | -2.3989 | 5.00E-05 | 0.00038 |
| <b>Rcn1</b>          | -1.4248 | 5.00E-05 | 0.00032 | -2.2509 | 5.00E-05 | 0.00038 |
| <b>Gm14403</b>       | -1.4265 | 0.0015   | 0.00627 | -3.0463 | 5.00E-05 | 0.00038 |
| <b>4933439F18Rik</b> | -1.427  | 5.00E-05 | 0.00032 | -1.233  | 0.0013   | 0.00641 |
| <b>4930430F08Rik</b> | -1.4279 | 0.00085  | 0.00387 | -1.7806 | 4.00E-04 | 0.00237 |
| <b>Zfhx4</b>         | -1.4286 | 5.00E-05 | 0.00032 | -1.9511 | 5.00E-05 | 0.00038 |
| <b>Hspa12a</b>       | -1.4301 | 5.00E-05 | 0.00032 | -1.1975 | 0.0025   | 0.011   |
| <b>Cmb1</b>          | -1.4304 | 5.00E-05 | 0.00032 | -1.2153 | 4.00E-04 | 0.00237 |
| <b>Wdr89</b>         | -1.4316 | 0.0176   | 0.04821 | -1.4203 | 0.0093   | 0.03221 |
| <b>Mpp7</b>          | -1.4353 | 0.0024   | 0.00929 | -1.3153 | 0.00495  | 0.01919 |
| <b>Ptp4a2</b>        | -1.4386 | 5.00E-05 | 0.00032 | -2.2438 | 5.00E-05 | 0.00038 |
| <b>Npl</b>           | -1.44   | 0.00715  | 0.02309 | -3.4974 | 0.00265  | 0.01149 |
| <b>Creb3l2</b>       | -1.4441 | 5.00E-05 | 0.00032 | -1.4305 | 5.00E-05 | 0.00038 |
| <b>Maoa</b>          | -1.4451 | 5.00E-05 | 0.00032 | -1.6411 | 5.00E-05 | 0.00038 |
| <b>Calm1</b>         | -1.4451 | 5.00E-05 | 0.00032 | -1.7336 | 5.00E-04 | 0.00287 |
| <b>Abca8b</b>        | -1.4456 | 5.00E-05 | 0.00032 | -1.7765 | 5.00E-05 | 0.00038 |

|                      |         |          |         |         |          |         |
|----------------------|---------|----------|---------|---------|----------|---------|
| <b>Cand2</b>         | -1.4463 | 5.00E-05 | 0.00032 | -1.7713 | 5.00E-05 | 0.00038 |
| <b>Ctsc</b>          | -1.4467 | 5.00E-05 | 0.00032 | -1.5486 | 5.00E-05 | 0.00038 |
| <b>1110058L19Rik</b> | -1.4495 | 5.00E-05 | 0.00032 | -2.3942 | 5.00E-05 | 0.00038 |
| <b>Zfp710</b>        | -1.4502 | 5.00E-05 | 0.00032 | -0.8631 | 0.0037   | 0.01519 |
| <b>Lphn1</b>         | -1.4505 | 0.00075  | 0.00349 | -2.1378 | 5.00E-05 | 0.00038 |
| <b>Ebpl</b>          | -1.4516 | 7.00E-04 | 0.00328 | -2.4023 | 5.00E-05 | 0.00038 |
| <b>1700020I14Rik</b> | -1.4521 | 5.00E-05 | 0.00032 | -2.1581 | 5.00E-05 | 0.00038 |
| <b>Sntb1</b>         | -1.4521 | 0.00555  | 0.01875 | -4.0208 | 5.00E-05 | 0.00038 |
| <b>D2hgdh</b>        | -1.4541 | 5.00E-05 | 0.00032 | -2.288  | 5.00E-05 | 0.00038 |
| <b>Nfib</b>          | -1.4544 | 5.00E-05 | 0.00032 | -1.7304 | 5.00E-05 | 0.00038 |
| <b>Trib2</b>         | -1.4547 | 5.00E-05 | 0.00032 | -1.3317 | 5.00E-05 | 0.00038 |
| <b>Sema3b</b>        | -1.4561 | 5.00E-05 | 0.00032 | -2.5982 | 5.00E-05 | 0.00038 |
| <b>Asap3</b>         | -1.4562 | 0.00045  | 0.00224 | -1.4467 | 0.00085  | 0.00449 |
| <b>Sh3glb2</b>       | -1.4596 | 5.00E-05 | 0.00032 | -1.5345 | 0.00195  | 0.00898 |
| <b>Atxn1</b>         | -1.4599 | 5.00E-05 | 0.00032 | -1.7869 | 5.00E-05 | 0.00038 |
| <b>Vamp1</b>         | -1.4603 | 5.00E-05 | 0.00032 | -2.0643 | 5.00E-05 | 0.00038 |
| <b>Uxs1</b>          | -1.4603 | 1.00E-04 | 0.0006  | -1.6044 | 3.00E-04 | 0.00184 |
| <b>Pla2g4b</b>       | -1.4618 | 0.0013   | 0.00554 | -1.8329 | 0.00055  | 0.00312 |
| <b>Fgf11</b>         | -1.4649 | 5.00E-05 | 0.00032 | -2.7137 | 5.00E-05 | 0.00038 |
| <b>Srp54b</b>        | -1.4658 | 5.00E-05 | 0.00032 | -2.5056 | 5.00E-05 | 0.00038 |
| <b>Alg3</b>          | -1.4669 | 5.00E-05 | 0.00032 | -1.7635 | 5.00E-05 | 0.00038 |
| <b>Slc35b4</b>       | -1.4673 | 7.00E-04 | 0.00328 | -1.7904 | 5.00E-05 | 0.00038 |
| <b>Rhobtb1</b>       | -1.4677 | 5.00E-05 | 0.00032 | -1.5098 | 5.00E-05 | 0.00038 |
| <b>Pyroxd2</b>       | -1.4682 | 4.00E-04 | 0.00203 | -1.4138 | 0.00435  | 0.01729 |
| <b>Vegfc</b>         | -1.4695 | 0.00535  | 0.01818 | -1.3533 | 0.00975  | 0.03344 |
| <b>H2afz</b>         | -1.4757 | 5.00E-05 | 0.00032 | -1.5558 | 5.00E-05 | 0.00038 |
| <b>Zfp324</b>        | -1.4762 | 4.00E-04 | 0.00203 | -2.2904 | 5.00E-05 | 0.00038 |
| <b>Mtap2</b>         | -1.4765 | 0.00265  | 0.01011 | -1.9689 | 0.00015  | 0.00102 |
| <b>1700025G04Rik</b> | -1.4765 | 5.00E-05 | 0.00032 | -2.1424 | 5.00E-05 | 0.00038 |
| <b>Tmem41a</b>       | -1.4794 | 0.00165  | 0.00681 | -1.9084 | 5.00E-05 | 0.00038 |
| <b>Zfp111</b>        | -1.4806 | 0.0065   | 0.02141 | -1.9067 | 0.00065  | 0.00359 |
| <b>Dhrs7b</b>        | -1.4849 | 5.00E-05 | 0.00032 | -2.0238 | 5.00E-05 | 0.00038 |
| <b>Nudt12</b>        | -1.4879 | 1.00E-04 | 0.0006  | -1.6931 | 5.00E-04 | 0.00287 |
| <b>Zfp879</b>        | -1.4971 | 9.00E-04 | 0.00406 | -2.8579 | 3.00E-04 | 0.00184 |
| <b>Trim32</b>        | -1.4973 | 5.00E-05 | 0.00032 | -1.6663 | 0.00045  | 0.00262 |
| <b>Lace1</b>         | -1.4997 | 5.00E-05 | 0.00032 | -2.2984 | 5.00E-05 | 0.00038 |
| <b>BC017612</b>      | -1.5027 | 5.00E-05 | 0.00032 | -1.0406 | 0.00515  | 0.01983 |
| <b>Ak1</b>           | -1.5036 | 5.00E-05 | 0.00032 | -2.652  | 5.00E-05 | 0.00038 |
| <b>Pex26</b>         | -1.505  | 0.00025  | 0.00135 | -2.1361 | 5.00E-05 | 0.00038 |
| <b>Lgals1</b>        | -1.5055 | 5.00E-05 | 0.00032 | -1.4959 | 5.00E-05 | 0.00038 |
| <b>Muted</b>         | -1.5087 | 5.00E-05 | 0.00032 | -1.369  | 3.00E-04 | 0.00184 |

|                      |         |          |         |         |          |         |
|----------------------|---------|----------|---------|---------|----------|---------|
| <b>2900076A07Rik</b> | -1.5125 | 5.00E-05 | 0.00032 | -2.5127 | 5.00E-05 | 0.00038 |
| <b>Zfp931</b>        | -1.5143 | 5.00E-05 | 0.00032 | -2.7635 | 5.00E-05 | 0.00038 |
| <b>Lpar1</b>         | -1.5143 | 0.0011   | 0.00481 | -1.1654 | 0.00715  | 0.02598 |
| <b>Crhr2</b>         | -1.5165 | 5.00E-05 | 0.00032 | -2.2784 | 5.00E-05 | 0.00038 |
| <b>Fzd2</b>          | -1.519  | 0.0037   | 0.01329 | -1.6071 | 0.003    | 0.01275 |
| <b>Cadm1</b>         | -1.5199 | 3.00E-04 | 0.00158 | -1.5506 | 0.00255  | 0.01114 |
| <b>Wnt9a</b>         | -1.5217 | 5.00E-05 | 0.00032 | -1.5773 | 5.00E-05 | 0.00038 |
| <b>Ddr2</b>          | -1.525  | 5.00E-05 | 0.00032 | -1.8607 | 5.00E-05 | 0.00038 |
| <b>Glt25d2</b>       | -1.5284 | 5.00E-05 | 0.00032 | -2.0272 | 5.00E-05 | 0.00038 |
| <b>Lhfp12</b>        | -1.5295 | 0.01545  | 0.04342 | -1.5193 | 0.00335  | 0.01398 |
| <b>Lin9</b>          | -1.5369 | 5.00E-05 | 0.00032 | -1.3969 | 6.00E-04 | 0.00335 |
| <b>Cry11</b>         | -1.5377 | 0.00015  | 0.00086 | -1.4422 | 0.00095  | 0.00492 |
| <b>1110008J03Rik</b> | -1.5427 | 7.00E-04 | 0.00328 | -1.5683 | 0.00105  | 0.00534 |
| <b>Cdon</b>          | -1.5428 | 0.00015  | 0.00086 | -2.2054 | 5.00E-05 | 0.00038 |
| <b>Sbk2</b>          | -1.5442 | 5.00E-05 | 0.00032 | -3.2735 | 5.00E-05 | 0.00038 |
| <b>Sorcs2</b>        | -1.5474 | 0.00205  | 0.00814 | -2.118  | 0.0018   | 0.00842 |
| <b>Pcdh12</b>        | -1.5534 | 5.00E-05 | 0.00032 | -3.3743 | 5.00E-05 | 0.00038 |
| <b>Antxr1</b>        | -1.5544 | 5.00E-05 | 0.00032 | -2.0359 | 5.00E-05 | 0.00038 |
| <b>Rom1</b>          | -1.5558 | 5.00E-05 | 0.00032 | -2.2185 | 5.00E-05 | 0.00038 |
| <b>Susd2</b>         | -1.5564 | 5.00E-04 | 0.00244 | -1.8315 | 0.00065  | 0.00359 |
| <b>Slc26a6</b>       | -1.5583 | 5.00E-05 | 0.00032 | -1.8304 | 5.00E-05 | 0.00038 |
| <b>P1ce1</b>         | -1.5609 | 5.00E-05 | 0.00032 | -1.5197 | 0.00015  | 0.00102 |
| <b>Sspn</b>          | -1.5623 | 5.00E-05 | 0.00032 | -2.8016 | 5.00E-05 | 0.00038 |
| <b>Kdelc2</b>        | -1.5626 | 5.00E-05 | 0.00032 | -2.1816 | 5.00E-05 | 0.00038 |
| <b>Pgpep1</b>        | -1.5638 | 5.00E-05 | 0.00032 | -1.2452 | 0.00065  | 0.00359 |
| <b>Hnmt</b>          | -1.5642 | 0.00025  | 0.00135 | -2.1747 | 5.00E-05 | 0.00038 |
| <b>Dut</b>           | -1.5694 | 5.00E-05 | 0.00032 | -1.9657 | 5.00E-05 | 0.00038 |
| <b>2310003H01Rik</b> | -1.5695 | 0.0019   | 0.00766 | -1.8291 | 4.00E-04 | 0.00237 |
| <b>Eda</b>           | -1.5699 | 0.00845  | 0.02651 | -1.7594 | 0.00495  | 0.01919 |
| <b>Bgn</b>           | -1.5715 | 5.00E-05 | 0.00032 | -2.68   | 5.00E-05 | 0.00038 |
| <b>Hlcs</b>          | -1.5741 | 5.00E-05 | 0.00032 | -1.2819 | 2.00E-04 | 0.00131 |
| <b>Smoc2</b>         | -1.5767 | 5.00E-05 | 0.00032 | -2.3835 | 5.00E-05 | 0.00038 |
| <b>Mme</b>           | -1.5771 | 0.00045  | 0.00224 | -1.8452 | 2.00E-04 | 0.00131 |
| <b>S1pr2</b>         | -1.5772 | 0.00205  | 0.00814 | -1.9798 | 0.00085  | 0.00449 |
| <b>Smyd1</b>         | -1.5803 | 5.00E-05 | 0.00032 | -3.3871 | 5.00E-05 | 0.00038 |
| <b>Ccng1</b>         | -1.5811 | 5.00E-05 | 0.00032 | -2.1652 | 5.00E-05 | 0.00038 |
| <b>Podxl2</b>        | -1.5813 | 5.00E-05 | 0.00032 | -1.1029 | 0.0071   | 0.02583 |
| <b>Serf1</b>         | -1.5815 | 0.0022   | 0.00865 | -1.3558 | 0.0061   | 0.02276 |
| <b>Ttc23</b>         | -1.582  | 0.00325  | 0.01196 | -2.0402 | 0.00025  | 0.00159 |
| <b>Pip4k2b</b>       | -1.5822 | 5.00E-05 | 0.00032 | -2.2532 | 5.00E-05 | 0.00038 |
| <b>Tmem132a</b>      | -1.5831 | 0.00075  | 0.00349 | -2.7304 | 5.00E-05 | 0.00038 |



|                      |         |          |         |         |          |         |
|----------------------|---------|----------|---------|---------|----------|---------|
| <b>Mfsd3</b>         | -1.5838 | 5.00E-05 | 0.00032 | -2.2791 | 5.00E-05 | 0.00038 |
| <b>Plekhb1</b>       | -1.5842 | 5.00E-05 | 0.00032 | -1.2866 | 5.00E-05 | 0.00038 |
| <b>Ttl</b>           | -1.5845 | 5.00E-05 | 0.00032 | -2.1289 | 5.00E-05 | 0.00038 |
| <b>Itgb1bp2</b>      | -1.5862 | 5.00E-05 | 0.00032 | -2.9416 | 5.00E-05 | 0.00038 |
| <b>Hpgd</b>          | -1.5867 | 0.0064   | 0.02114 | -3.3771 | 2.00E-04 | 0.00131 |
| <b>Fstl1</b>         | -1.588  | 5.00E-05 | 0.00032 | -2.3659 | 5.00E-05 | 0.00038 |
| <b>Cyp2e1</b>        | -1.5898 | 0.0026   | 0.00995 | 1.57587 | 0.0025   | 0.011   |
| <b>Rcbtb2</b>        | -1.5906 | 0.0106   | 0.03191 | -2.1253 | 0.0021   | 0.00957 |
| <b>Scrn1</b>         | -1.5917 | 0.00345  | 0.01257 | -2.0558 | 0.0055   | 0.02087 |
| <b>Axl</b>           | -1.5917 | 5.00E-05 | 0.00032 | -1.2048 | 6.00E-04 | 0.00335 |
| <b>Kcnj12</b>        | -1.5918 | 5.00E-05 | 0.00032 | -2.1344 | 5.00E-05 | 0.00038 |
| <b>Oxct1</b>         | -1.5932 | 5.00E-05 | 0.00032 | -1.5007 | 5.00E-05 | 0.00038 |
| <b>Dcn</b>           | -1.5943 | 5.00E-05 | 0.00032 | -1.4121 | 5.00E-05 | 0.00038 |
| <b>Fam173a</b>       | -1.5949 | 5.00E-05 | 0.00032 | -1.94   | 5.00E-05 | 0.00038 |
| <b>Ppp1r26</b>       | -1.5971 | 0.0048   | 0.01661 | -1.5028 | 0.00895  | 0.03119 |
| <b>Parp16</b>        | -1.599  | 5.00E-05 | 0.00032 | -1.4885 | 0.0013   | 0.00641 |
| <b>Rtn4ip1</b>       | -1.6012 | 5.00E-05 | 0.00032 | -2.8464 | 5.00E-05 | 0.00038 |
| <b>Mxra7</b>         | -1.6057 | 4.00E-04 | 0.00203 | -2.0911 | 5.00E-05 | 0.00038 |
| <b>Trmt2b</b>        | -1.6106 | 5.00E-05 | 0.00032 | -1.7742 | 5.00E-05 | 0.00038 |
| <b>Scamp5</b>        | -1.613  | 0.00035  | 0.00181 | -1.3299 | 0.0032   | 0.01343 |
| <b>Khdrbs3</b>       | -1.6173 | 5.00E-05 | 0.00032 | -0.9291 | 0.0095   | 0.03279 |
| <b>5730409E04Rik</b> | -1.621  | 5.00E-05 | 0.00032 | -2.5798 | 5.00E-05 | 0.00038 |
| <b>Arsk</b>          | -1.6232 | 2.00E-04 | 0.00111 | -2.3402 | 0.00105  | 0.00534 |
| <b>Sytl2</b>         | -1.6236 | 9.00E-04 | 0.00406 | -1.9917 | 1.00E-04 | 0.00072 |
| <b>BY080835</b>      | -1.6237 | 5.00E-05 | 0.00032 | -2.4195 | 5.00E-05 | 0.00038 |
| <b>Colec12</b>       | -1.6254 | 5.00E-05 | 0.00032 | -1.3064 | 0.00025  | 0.00159 |
| <b>D630037F22Rik</b> | -1.6268 | 0.0019   | 0.00766 | -1.6863 | 0.00075  | 0.00405 |
| <b>Gstt1</b>         | -1.6287 | 9.00E-04 | 0.00406 | -1.5897 | 3.00E-04 | 0.00184 |
| <b>Col27a1</b>       | -1.6295 | 3.00E-04 | 0.00158 | -1.4286 | 0.01365  | 0.04381 |
| <b>Zfp873</b>        | -1.6311 | 0.0139   | 0.03982 | -2.1129 | 0.00775  | 0.02774 |
| <b>Fzd1</b>          | -1.6315 | 0.00025  | 0.00135 | -1.6096 | 3.00E-04 | 0.00184 |
| <b>Xrcc6bp1</b>      | -1.6319 | 0.014    | 0.04004 | -2.0458 | 0.0014   | 0.00681 |
| <b>Wdr35</b>         | -1.6342 | 5.00E-05 | 0.00032 | -1.6594 | 0.00825  | 0.02918 |
| <b>Fbn1</b>          | -1.6364 | 5.00E-05 | 0.00032 | -3.0813 | 5.00E-05 | 0.00038 |
| <b>Ramp1</b>         | -1.6365 | 5.00E-05 | 0.00032 | -1.7315 | 5.00E-05 | 0.00038 |
| <b>Abhd8</b>         | -1.6366 | 5.00E-05 | 0.00032 | -1.5878 | 5.00E-05 | 0.00038 |
| <b>Pdgfrl</b>        | -1.6384 | 0.00085  | 0.00387 | -1.3886 | 0.0032   | 0.01343 |
| <b>BB218582</b>      | -1.6397 | 0.0107   | 0.03213 | -2.0547 | 0.012    | 0.03937 |
| <b>Golm1</b>         | -1.643  | 5.00E-05 | 0.00032 | -0.844  | 0.00915  | 0.03177 |
| <b>Bpnt1</b>         | -1.6434 | 5.00E-05 | 0.00032 | -2.4333 | 5.00E-05 | 0.00038 |
| <b>Dck</b>           | -1.6511 | 7.00E-04 | 0.00328 | -1.1426 | 0.00515  | 0.01983 |

|                      |         |          |         |         |          |         |
|----------------------|---------|----------|---------|---------|----------|---------|
| <b>Serpinb9</b>      | -1.6528 | 5.00E-05 | 0.00032 | -1.6698 | 5.00E-05 | 0.00038 |
| <b>Ahdc1</b>         | -1.656  | 0.00025  | 0.00135 | -1.6679 | 0.00045  | 0.00262 |
| <b>Lrrfip1</b>       | -1.6585 | 5.00E-05 | 0.00032 | -1.4974 | 5.00E-05 | 0.00038 |
| <b>Myl2</b>          | -1.6602 | 5.00E-05 | 0.00032 | -2.4424 | 5.00E-05 | 0.00038 |
| <b>Ecm2</b>          | -1.6608 | 0.0012   | 0.00518 | -1.9719 | 0.0039   | 0.01589 |
| <b>Kcnq5</b>         | -1.6614 | 5.00E-05 | 0.00032 | -2.6932 | 5.00E-05 | 0.00038 |
| <b>Fam110a</b>       | -1.6618 | 3.00E-04 | 0.00158 | -1.7569 | 0.00025  | 0.00159 |
| <b>D130017N08Rik</b> | -1.6628 | 5.00E-05 | 0.00032 | -2.5655 | 5.00E-05 | 0.00038 |
| <b>Mblac2</b>        | -1.6635 | 0.00085  | 0.00387 | -1.8181 | 0.00055  | 0.00312 |
| <b>Fgf6</b>          | -1.6637 | 0.00925  | 0.0286  | -3.5836 | 0.0015   | 0.00723 |
| <b>Xpr1</b>          | -1.6659 | 5.00E-05 | 0.00032 | -0.9836 | 0.00175  | 0.00822 |
| <b>Slc25a10</b>      | -1.669  | 5.00E-05 | 0.00032 | -1.3369 | 0.0057   | 0.0215  |
| <b>Tmem218</b>       | -1.6721 | 5.00E-05 | 0.00032 | -2.0003 | 5.00E-05 | 0.00038 |
| <b>Arhgap19</b>      | -1.6731 | 5.00E-05 | 0.00032 | -1.7357 | 5.00E-05 | 0.00038 |
| <b>Mtfp1</b>         | -1.6741 | 5.00E-05 | 0.00032 | -2.5867 | 5.00E-05 | 0.00038 |
| <b>Aff3</b>          | -1.6743 | 0.01265  | 0.0369  | -1.958  | 0.00105  | 0.00534 |
| <b>Ergic1</b>        | -1.6757 | 5.00E-05 | 0.00032 | -1.8464 | 5.00E-05 | 0.00038 |
| <b>Hspb2</b>         | -1.6764 | 5.00E-05 | 0.00032 | -2.3271 | 5.00E-05 | 0.00038 |
| <b>Gm15440</b>       | -1.6799 | 5.00E-05 | 0.00032 | -2.2057 | 5.00E-05 | 0.00038 |
| <b>Scn1b</b>         | -1.6802 | 5.00E-05 | 0.00032 | -2.3234 | 5.00E-05 | 0.00038 |
| <b>Stac3</b>         | -1.681  | 5.00E-05 | 0.00032 | -3.4402 | 5.00E-05 | 0.00038 |
| <b>Eno3</b>          | -1.6812 | 5.00E-05 | 0.00032 | -2.8981 | 5.00E-05 | 0.00038 |
| <b>Tuba1a</b>        | -1.6843 | 1.00E-04 | 0.0006  | -2.0608 | 5.00E-05 | 0.00038 |
| <b>Zfp467</b>        | -1.6873 | 2.00E-04 | 0.00111 | -1.3472 | 0.0026   | 0.01132 |
| <b>Umps</b>          | -1.6888 | 5.00E-05 | 0.00032 | -2.1001 | 5.00E-05 | 0.00038 |
| <b>B230312C02Rik</b> | -1.6894 | 5.00E-05 | 0.00032 | -3.0713 | 5.00E-05 | 0.00038 |
| <b>Apobec2</b>       | -1.6922 | 5.00E-05 | 0.00032 | -2.5631 | 5.00E-05 | 0.00038 |
| <b>Kcnb1</b>         | -1.6925 | 5.00E-05 | 0.00032 | -2.444  | 5.00E-05 | 0.00038 |
| <b>Cd55</b>          | -1.6935 | 5.00E-05 | 0.00032 | -1.652  | 5.00E-05 | 0.00038 |
| <b>Dcun1d2</b>       | -1.6944 | 5.00E-05 | 0.00032 | -2.9068 | 5.00E-05 | 0.00038 |
| <b>Pds5b</b>         | -1.6946 | 5.00E-05 | 0.00032 | -1.4307 | 1.00E-04 | 0.00072 |
| <b>Tuba1b</b>        | -1.6948 | 3.00E-04 | 0.00158 | -1.1632 | 0.0041   | 0.0165  |
| <b>Flrt2</b>         | -1.6958 | 5.00E-05 | 0.00032 | -1.6022 | 5.00E-05 | 0.00038 |
| <b>Srpx</b>          | -1.6972 | 0.0115   | 0.03416 | -2.3953 | 0.0077   | 0.0276  |
| <b>Gm14698</b>       | -1.6986 | 5.00E-05 | 0.00032 | -1.8527 | 5.00E-05 | 0.00038 |
| <b>Synm</b>          | -1.6994 | 5.00E-05 | 0.00032 | -2.5087 | 5.00E-05 | 0.00038 |
| <b>Emr1</b>          | -1.7032 | 0.01075  | 0.03222 | -2.0656 | 0.0016   | 0.00763 |
| <b>Dusp23</b>        | -1.7032 | 5.00E-05 | 0.00032 | -2.1098 | 5.00E-05 | 0.00038 |
| <b>Crtap</b>         | -1.7038 | 1.00E-04 | 0.0006  | -1.3978 | 0.00215  | 0.00974 |
| <b>Praf2</b>         | -1.7048 | 0.00025  | 0.00135 | -1.1139 | 0.00775  | 0.02774 |
| <b>Cacng7</b>        | -1.7057 | 5.00E-05 | 0.00032 | -1.5538 | 5.00E-05 | 0.00038 |

|                      |         |          |         |         |          |         |
|----------------------|---------|----------|---------|---------|----------|---------|
| <b>Bcs1l</b>         | -1.7057 | 5.00E-05 | 0.00032 | -2.7648 | 5.00E-05 | 0.00038 |
| <b>Ttc30a1</b>       | -1.7075 | 0.00075  | 0.00349 | -1.5385 | 0.00285  | 0.01222 |
| <b>Ppp2r3a</b>       | -1.7091 | 5.00E-05 | 0.00032 | -2.6257 | 5.00E-05 | 0.00038 |
| <b>Dhrs7c</b>        | -1.7106 | 5.00E-05 | 0.00032 | -3.0431 | 5.00E-05 | 0.00038 |
| <b>Lrfn3</b>         | -1.7109 | 0.00035  | 0.00181 | -1.7296 | 0.00015  | 0.00102 |
| <b>Dynll2</b>        | -1.7146 | 5.00E-05 | 0.00032 | -2.4822 | 5.00E-05 | 0.00038 |
| <b>Tppp3</b>         | -1.7147 | 5.00E-05 | 0.00032 | -2.9919 | 5.00E-05 | 0.00038 |
| <b>Gpc3</b>          | -1.7163 | 5.00E-05 | 0.00032 | -1.5713 | 0.00035  | 0.00212 |
| <b>1810010H24Rik</b> | -1.7169 | 0.0144   | 0.04093 | -2.7215 | 0.01315  | 0.04246 |
| <b>Igf1</b>          | -1.7178 | 0.01405  | 0.04013 | -3.0121 | 5.00E-05 | 0.00038 |
| <b>Eml1</b>          | -1.7237 | 5.00E-05 | 0.00032 | -2.3984 | 5.00E-05 | 0.00038 |
| <b>Scrn2</b>         | -1.7244 | 5.00E-05 | 0.00032 | -1.9901 | 5.00E-05 | 0.00038 |
| <b>Col8a1</b>        | -1.7257 | 5.00E-05 | 0.00032 | -2.3873 | 5.00E-05 | 0.00038 |
| <b>Rian</b>          | -1.7258 | 5.00E-05 | 0.00032 | -5.3297 | 5.00E-05 | 0.00038 |
| <b>Slc45a4</b>       | -1.7298 | 5.00E-05 | 0.00032 | -2.044  | 5.00E-05 | 0.00038 |
| <b>4931406C07Rik</b> | -1.7329 | 5.00E-05 | 0.00032 | -1.0589 | 0.0046   | 0.01814 |
| <b>Tpi1</b>          | -1.7357 | 5.00E-05 | 0.00032 | -2.5613 | 5.00E-05 | 0.00038 |
| <b>Tspan12</b>       | -1.7364 | 5.00E-05 | 0.00032 | -2.5036 | 5.00E-05 | 0.00038 |
| <b>Klhl23</b>        | -1.7395 | 0.00045  | 0.00224 | -1.564  | 0.00015  | 0.00102 |
| <b>Gpr180</b>        | -1.74   | 5.00E-05 | 0.00032 | -1.9541 | 5.00E-05 | 0.00038 |
| <b>Mkl1</b>          | -1.7416 | 0.01035  | 0.03132 | -2.1634 | 1.00E-04 | 0.00072 |
| <b>Gm16340</b>       | -1.7467 | 0.00255  | 0.00979 | -2.6265 | 2.00E-04 | 0.00131 |
| <b>Pld2</b>          | -1.7481 | 0.00025  | 0.00135 | -1.9216 | 0.00015  | 0.00102 |
| <b>Sod3</b>          | -1.7502 | 5.00E-05 | 0.00032 | -1.7871 | 1.00E-04 | 0.00072 |
| <b>Sema6d</b>        | -1.7563 | 5.00E-05 | 0.00032 | -1.9956 | 5.00E-05 | 0.00038 |
| <b>Tada2a</b>        | -1.7591 | 5.00E-05 | 0.00032 | -0.9524 | 0.01465  | 0.04609 |
| <b>Igfals</b>        | -1.7611 | 0.002    | 0.00799 | -3.2874 | 0.00405  | 0.01634 |
| <b>Fzd9</b>          | -1.7627 | 5.00E-05 | 0.00032 | -1.247  | 4.00E-04 | 0.00237 |
| <b>Kctd7</b>         | -1.7633 | 0.0024   | 0.00929 | -2.8598 | 5.00E-05 | 0.00038 |
| <b>Adamts5</b>       | -1.7657 | 5.00E-05 | 0.00032 | -1.8425 | 5.00E-05 | 0.00038 |
| <b>S100a4</b>        | -1.769  | 1.00E-04 | 0.0006  | -1.3507 | 7.00E-04 | 0.00383 |
| <b>Hn1</b>           | -1.769  | 5.00E-05 | 0.00032 | -1.8002 | 5.00E-05 | 0.00038 |
| <b>Narf</b>          | -1.7709 | 0.00045  | 0.00224 | -2.2702 | 1.00E-04 | 0.00072 |
| <b>H2-Ea-ps</b>      | -1.7712 | 1.00E-04 | 0.0006  | -1.6707 | 2.00E-04 | 0.00131 |
| <b>Klhl17</b>        | -1.7716 | 5.00E-05 | 0.00032 | -1.5735 | 5.00E-05 | 0.00038 |
| <b>Zfp385a</b>       | -1.7725 | 5.00E-05 | 0.00032 | -1.1971 | 0.00235  | 0.01046 |
| <b>Rap2b</b>         | -1.7728 | 0.00025  | 0.00135 | -1.4726 | 0.00095  | 0.00492 |
| <b>Slc9a9</b>        | -1.7769 | 0.0042   | 0.01482 | -1.4171 | 0.01045  | 0.03523 |
| <b>Gm889</b>         | -1.7883 | 5.00E-05 | 0.00032 | -1.1858 | 0.00245  | 0.01083 |
| <b>Ptgir</b>         | -1.789  | 0.00045  | 0.00224 | -1.1983 | 0.00915  | 0.03177 |
| <b>Zfp518b</b>       | -1.7921 | 5.00E-05 | 0.00032 | -2.0913 | 5.00E-05 | 0.00038 |

|                      |         |          |         |         |          |         |
|----------------------|---------|----------|---------|---------|----------|---------|
| <b>Siae</b>          | -1.7947 | 5.00E-05 | 0.00032 | -2.6975 | 5.00E-05 | 0.00038 |
| <b>Slco5a1</b>       | -1.7977 | 5.00E-05 | 0.00032 | -2.6088 | 5.00E-05 | 0.00038 |
| <b>Hr</b>            | -1.8    | 5.00E-05 | 0.00032 | -3.3384 | 5.00E-05 | 0.00038 |
| <b>Timp2</b>         | -1.8018 | 5.00E-05 | 0.00032 | -1.55   | 5.00E-05 | 0.00038 |
| <b>Rxrg</b>          | -1.8051 | 5.00E-05 | 0.00032 | -2.6886 | 5.00E-05 | 0.00038 |
| <b>Scn4b</b>         | -1.8058 | 5.00E-05 | 0.00032 | -2.9064 | 5.00E-05 | 0.00038 |
| <b>Ldb3</b>          | -1.8062 | 5.00E-05 | 0.00032 | -3.5205 | 5.00E-05 | 0.00038 |
| <b>Pgm2l1</b>        | -1.8065 | 5.00E-05 | 0.00032 | -1.2358 | 1.00E-04 | 0.00072 |
| <b>Polr3k</b>        | -1.8086 | 5.00E-05 | 0.00032 | -2.0031 | 5.00E-05 | 0.00038 |
| <b>P2ry6</b>         | -1.8095 | 0.00105  | 0.00462 | -1.5015 | 0.00475  | 0.0186  |
| <b>Alpl</b>          | -1.81   | 0.00055  | 0.00266 | -2.2486 | 5.00E-05 | 0.00038 |
| <b>Ldha</b>          | -1.8117 | 5.00E-05 | 0.00032 | -2.9338 | 5.00E-05 | 0.00038 |
| <b>Gprc5c</b>        | -1.8136 | 5.00E-05 | 0.00032 | -2.4561 | 5.00E-05 | 0.00038 |
| <b>Fsd2</b>          | -1.8166 | 5.00E-05 | 0.00032 | -2.7632 | 5.00E-05 | 0.00038 |
| <b>Ush1c</b>         | -1.8315 | 3.00E-04 | 0.00158 | -3.27   | 5.00E-05 | 0.00038 |
| <b>Srpk3</b>         | -1.8331 | 5.00E-05 | 0.00032 | -2.9201 | 5.00E-05 | 0.00038 |
| <b>Cxcl16</b>        | -1.8372 | 0.00375  | 0.01345 | -1.3486 | 0.01415  | 0.04492 |
| <b>Gpx8</b>          | -1.8384 | 1.00E-04 | 0.0006  | -1.7877 | 5.00E-05 | 0.00038 |
| <b>Rtn4</b>          | -1.8386 | 5.00E-05 | 0.00032 | -2.2924 | 5.00E-05 | 0.00038 |
| <b>Dse</b>           | -1.8431 | 5.00E-05 | 0.00032 | -1.7696 | 1.00E-04 | 0.00072 |
| <b>Ank1</b>          | -1.8437 | 5.00E-05 | 0.00032 | -2.4163 | 5.00E-05 | 0.00038 |
| <b>Angpt1</b>        | -1.8454 | 5.00E-05 | 0.00032 | -3.4949 | 5.00E-05 | 0.00038 |
| <b>Arhgdib</b>       | -1.8462 | 5.00E-05 | 0.00032 | 1.10223 | 0.00155  | 0.00742 |
| <b>Slc25a15</b>      | -1.8468 | 5.00E-05 | 0.00032 | -2.2865 | 5.00E-05 | 0.00038 |
| <b>Zfp808</b>        | -1.8492 | 0.01195  | 0.0352  | -2.157  | 0.0016   | 0.00763 |
| <b>Cilp</b>          | -1.8506 | 5.00E-05 | 0.00032 | -2.6976 | 5.00E-05 | 0.00038 |
| <b>Gbp4</b>          | -1.8512 | 5.00E-05 | 0.00032 | -1.1889 | 0.00015  | 0.00102 |
| <b>Polh</b>          | -1.8539 | 5.00E-05 | 0.00032 | -2.0759 | 5.00E-05 | 0.00038 |
| <b>2810405K02Rik</b> | -1.8544 | 5.00E-05 | 0.00032 | -2.0613 | 5.00E-05 | 0.00038 |
| <b>Galnt1l1</b>      | -1.8651 | 5.00E-05 | 0.00032 | -1.6262 | 3.00E-04 | 0.00184 |
| <b>Msh3</b>          | -1.8752 | 5.00E-05 | 0.00032 | -1.7748 | 9.00E-04 | 0.0047  |
| <b>Rnf128</b>        | -1.8766 | 5.00E-05 | 0.00032 | -1.5767 | 5.00E-05 | 0.00038 |
| <b>Ptpla</b>         | -1.8783 | 5.00E-05 | 0.00032 | -3.3561 | 5.00E-05 | 0.00038 |
| <b>Ifi203</b>        | -1.8783 | 5.00E-05 | 0.00032 | -2.2396 | 5.00E-05 | 0.00038 |
| <b>Vwa3b</b>         | -1.8831 | 0.00125  | 0.00536 | -3.8997 | 2.00E-04 | 0.00131 |
| <b>Itih5</b>         | -1.8867 | 5.00E-05 | 0.00032 | -2.5413 | 5.00E-05 | 0.00038 |
| <b>Fam198b</b>       | -1.8905 | 5.00E-05 | 0.00032 | -2.2687 | 5.00E-05 | 0.00038 |
| <b>Rrm1</b>          | -1.8923 | 5.00E-05 | 0.00032 | -1.3718 | 5.00E-05 | 0.00038 |
| <b>Scin</b>          | -1.8938 | 0.0019   | 0.00766 | -2.6532 | 0.00035  | 0.00212 |
| <b>Asph</b>          | -1.8941 | 5.00E-05 | 0.00032 | -3.5053 | 5.00E-05 | 0.00038 |
| <b>Nudt4</b>         | -1.8976 | 5.00E-05 | 0.00032 | -2.2008 | 5.00E-05 | 0.00038 |

|                      |         |          |         |         |          |         |
|----------------------|---------|----------|---------|---------|----------|---------|
| <b>Mettl8</b>        | -1.9012 | 0.00085  | 0.00387 | -2.4187 | 0.0011   | 0.00557 |
| <b>Ikkip</b>         | -1.9021 | 5.00E-05 | 0.00032 | -2.6864 | 5.00E-05 | 0.00038 |
| <b>Slc25a19</b>      | -1.9032 | 5.00E-05 | 0.00032 | -2.8545 | 5.00E-05 | 0.00038 |
| <b>Pgam2</b>         | -1.9039 | 5.00E-05 | 0.00032 | -3.3263 | 5.00E-05 | 0.00038 |
| <b>St8sia5</b>       | -1.9085 | 5.00E-05 | 0.00032 | -2.8174 | 5.00E-05 | 0.00038 |
| <b>Lrp4</b>          | -1.9094 | 5.00E-05 | 0.00032 | -2.5135 | 5.00E-05 | 0.00038 |
| <b>Ppm1j</b>         | -1.9165 | 5.00E-05 | 0.00032 | -2.9857 | 5.00E-05 | 0.00038 |
| <b>Cpe</b>           | -1.9176 | 5.00E-05 | 0.00032 | -1.5671 | 5.00E-05 | 0.00038 |
| <b>Cdh13</b>         | -1.9179 | 5.00E-05 | 0.00032 | -1.2487 | 0.0024   | 0.01064 |
| <b>Yjefn3</b>        | -1.9195 | 2.00E-04 | 0.00111 | -1.0838 | 0.0106   | 0.03569 |
| <b>Pcsk6</b>         | -1.9273 | 5.00E-05 | 0.00032 | -2.7357 | 5.00E-05 | 0.00038 |
| <b>Oaf</b>           | -1.9289 | 2.00E-04 | 0.00111 | -2.9649 | 5.00E-05 | 0.00038 |
| <b>6530418L21Rik</b> | -1.9311 | 5.00E-05 | 0.00032 | -2.3232 | 5.00E-05 | 0.00038 |
| <b>Uts2r</b>         | -1.9333 | 0.0031   | 0.0115  | -2.262  | 0.0025   | 0.011   |
| <b>Gm14261</b>       | -1.9432 | 5.00E-05 | 0.00032 | -2.9036 | 5.00E-05 | 0.00038 |
| <b>Csdc2</b>         | -1.9452 | 0.0058   | 0.01944 | 1.34705 | 0.0037   | 0.01519 |
| <b>Arhgef9</b>       | -1.9459 | 5.00E-05 | 0.00032 | -2.6617 | 5.00E-05 | 0.00038 |
| <b>Mterfd3</b>       | -1.9464 | 5.00E-05 | 0.00032 | -2.6412 | 5.00E-05 | 0.00038 |
| <b>Cdc42ep2</b>      | -1.9472 | 5.00E-05 | 0.00032 | -2.4658 | 5.00E-05 | 0.00038 |
| <b>Psph</b>          | -1.9492 | 5.00E-05 | 0.00032 | -3.0834 | 5.00E-05 | 0.00038 |
| <b>Ddah1</b>         | -1.9509 | 5.00E-05 | 0.00032 | -3.8699 | 5.00E-05 | 0.00038 |
| <b>Fn3k</b>          | -1.9517 | 5.00E-05 | 0.00032 | -0.8516 | 0.0092   | 0.03192 |
| <b>Pdzd3</b>         | -1.9555 | 0.0076   | 0.02432 | -1.8547 | 0.0054   | 0.02055 |
| <b>Pitpnm3</b>       | -1.9603 | 5.00E-05 | 0.00032 | -1.9669 | 5.00E-05 | 0.00038 |
| <b>Fndc4</b>         | -1.9605 | 0.004    | 0.01419 | 1.21809 | 0.01075  | 0.03609 |
| <b>Ibtk</b>          | -1.9617 | 5.00E-05 | 0.00032 | -1.8045 | 5.00E-05 | 0.00038 |
| <b>Lbx1</b>          | -1.9687 | 5.00E-05 | 0.00032 | -2.116  | 5.00E-05 | 0.00038 |
| <b>Calm2</b>         | -1.9704 | 5.00E-05 | 0.00032 | -2.2205 | 5.00E-05 | 0.00038 |
| <b>Fez2</b>          | -1.9722 | 5.00E-05 | 0.00032 | -1.4939 | 0.0056   | 0.0212  |
| <b>3222401L13Rik</b> | -1.9728 | 0.00105  | 0.00462 | -2.2935 | 0.003    | 0.01275 |
| <b>Lmod3</b>         | -1.973  | 5.00E-05 | 0.00032 | -4.4487 | 5.00E-05 | 0.00038 |
| <b>D630003M21Rik</b> | -1.9742 | 1.00E-04 | 0.0006  | -2.5296 | 6.00E-04 | 0.00335 |
| <b>Alg14</b>         | -1.9828 | 0.00025  | 0.00135 | -2.5743 | 5.00E-05 | 0.00038 |
| <b>Cpa3</b>          | -1.9848 | 6.00E-04 | 0.00286 | -2.6364 | 0.00065  | 0.00359 |
| <b>Pgcp</b>          | -1.9861 | 5.00E-05 | 0.00032 | -3.1468 | 5.00E-05 | 0.00038 |
| <b>Pvalb</b>         | -1.9897 | 5.00E-05 | 0.00032 | -2.9287 | 5.00E-05 | 0.00038 |
| <b>Wls</b>           | -1.9899 | 5.00E-05 | 0.00032 | -1.4508 | 5.00E-05 | 0.00038 |
| <b>H2-Eb1</b>        | -1.99   | 5.00E-05 | 0.00032 | -1.7619 | 5.00E-05 | 0.00038 |
| <b>Cd74</b>          | -1.9916 | 5.00E-05 | 0.00032 | -1.7931 | 5.00E-05 | 0.00038 |
| <b>Cxxc5</b>         | -1.9944 | 5.00E-05 | 0.00032 | -2.6952 | 5.00E-05 | 0.00038 |
| <b>Inpp5j</b>        | -2.0013 | 0.00045  | 0.00224 | -4.1739 | 5.00E-05 | 0.00038 |

|                      |         |          |         |         |          |         |
|----------------------|---------|----------|---------|---------|----------|---------|
| <b>Actc1</b>         | -2.0017 | 5.00E-05 | 0.00032 | -3.3274 | 5.00E-05 | 0.00038 |
| <b>Olfml2b</b>       | -2.0069 | 5.00E-05 | 0.00032 | -1.2137 | 8.00E-04 | 0.00427 |
| <b>Phkg1</b>         | -2.0082 | 5.00E-05 | 0.00032 | -3.2916 | 0.00045  | 0.00262 |
| <b>Al464131</b>      | -2.0085 | 5.00E-05 | 0.00032 | -2.6085 | 5.00E-05 | 0.00038 |
| <b>Sec22c</b>        | -2.009  | 0.00015  | 0.00086 | -1.6241 | 4.00E-04 | 0.00237 |
| <b>Nov</b>           | -2.018  | 5.00E-05 | 0.00032 | -1.1676 | 0.0043   | 0.01712 |
| <b>Sort1</b>         | -2.0199 | 5.00E-05 | 0.00032 | -1.3246 | 2.00E-04 | 0.00131 |
| <b>Pctp</b>          | -2.0201 | 5.00E-05 | 0.00032 | -2.6606 | 5.00E-05 | 0.00038 |
| <b>C85492</b>        | -2.0212 | 5.00E-05 | 0.00032 | -2.55   | 5.00E-05 | 0.00038 |
| <b>Sbk1</b>          | -2.0232 | 5.00E-05 | 0.00032 | -1.9381 | 5.00E-05 | 0.00038 |
| <b>Isoc1</b>         | -2.0232 | 5.00E-05 | 0.00032 | -1.9801 | 5.00E-05 | 0.00038 |
| <b>Styx</b>          | -2.0243 | 5.00E-05 | 0.00032 | -1.972  | 5.00E-05 | 0.00038 |
| <b>Eepd1</b>         | -2.0285 | 5.00E-05 | 0.00032 | -2.4321 | 5.00E-05 | 0.00038 |
| <b>Emp3</b>          | -2.0293 | 5.00E-05 | 0.00032 | -1.2662 | 0.00225  | 0.0101  |
| <b>Dusp3</b>         | -2.0355 | 5.00E-05 | 0.00032 | -1.7905 | 5.00E-05 | 0.00038 |
| <b>Hic1</b>          | -2.0372 | 5.00E-05 | 0.00032 | -1.3392 | 0.01075  | 0.03609 |
| <b>Klhl13</b>        | -2.0392 | 1.00E-04 | 0.0006  | -2.1827 | 5.00E-05 | 0.00038 |
| <b>Shisa2</b>        | -2.0393 | 5.00E-05 | 0.00032 | -3.0212 | 5.00E-05 | 0.00038 |
| <b>Ufsp1</b>         | -2.0406 | 5.00E-05 | 0.00032 | -2.5328 | 5.00E-05 | 0.00038 |
| <b>Srpx2</b>         | -2.0473 | 5.00E-05 | 0.00032 | -2.9686 | 5.00E-05 | 0.00038 |
| <b>Cyp26b1</b>       | -2.048  | 5.00E-05 | 0.00032 | 1.94074 | 5.00E-05 | 0.00038 |
| <b>Ift122</b>        | -2.0494 | 0.00035  | 0.00181 | -1.4645 | 0.0153   | 0.04768 |
| <b>Trim35</b>        | -2.0544 | 5.00E-05 | 0.00032 | -2.529  | 5.00E-05 | 0.00038 |
| <b>Tmem106c</b>      | -2.0701 | 5.00E-05 | 0.00032 | -1.5278 | 0.00075  | 0.00405 |
| <b>Nes</b>           | -2.0709 | 5.00E-05 | 0.00032 | -2.6593 | 5.00E-05 | 0.00038 |
| <b>Tmsb10</b>        | -2.0712 | 5.00E-05 | 0.00032 | -1.2764 | 0.00185  | 0.00861 |
| <b>Sema4d</b>        | -2.0714 | 5.00E-05 | 0.00032 | -1.9695 | 3.00E-04 | 0.00184 |
| <b>Plekhh3</b>       | -2.0729 | 5.00E-05 | 0.00032 | -2.6347 | 5.00E-05 | 0.00038 |
| <b>5033430115Rik</b> | -2.0749 | 0.00335  | 0.01227 | -3.3317 | 0.001    | 0.00513 |
| <b>Scara3</b>        | -2.0751 | 5.00E-05 | 0.00032 | -1.9302 | 5.00E-05 | 0.00038 |
| <b>Igfbp6</b>        | -2.0774 | 5.00E-05 | 0.00032 | -0.8574 | 0.006    | 0.02242 |
| <b>Phtf2</b>         | -2.085  | 5.00E-05 | 0.00032 | -2.8997 | 5.00E-05 | 0.00038 |
| <b>Abca9</b>         | -2.087  | 5.00E-05 | 0.00032 | -2.3002 | 5.00E-05 | 0.00038 |
| <b>Btbd6</b>         | -2.0911 | 0.0024   | 0.00929 | -1.8101 | 0.01445  | 0.04566 |
| <b>Zfp72</b>         | -2.0949 | 0.00185  | 0.00749 | -2.7711 | 0.0015   | 0.00723 |
| <b>Dhfr</b>          | -2.0965 | 0.00285  | 0.01076 | -1.9567 | 0.01005  | 0.03423 |
| <b>Il12a</b>         | -2.097  | 5.00E-05 | 0.00032 | -2.6749 | 0.00065  | 0.00359 |
| <b>Crym</b>          | -2.0976 | 1.00E-04 | 0.0006  | -1.6476 | 0.0016   | 0.00763 |
| <b>Irgm2</b>         | -2.1017 | 5.00E-05 | 0.00032 | -2.5318 | 5.00E-05 | 0.00038 |
| <b>Arsb</b>          | -2.1088 | 0.0011   | 0.00481 | -2.137  | 0.00365  | 0.01502 |
| <b>Palld</b>         | -2.116  | 5.00E-05 | 0.00032 | -3.5491 | 5.00E-05 | 0.00038 |

|                      |         |          |         |         |          |         |
|----------------------|---------|----------|---------|---------|----------|---------|
| <b>Klh8</b>          | -2.1165 | 5.00E-05 | 0.00032 | -2.1699 | 5.00E-05 | 0.00038 |
| <b>Capn6</b>         | -2.1168 | 6.00E-04 | 0.00286 | -3.7955 | 5.00E-05 | 0.00038 |
| <b>Prelp</b>         | -2.12   | 5.00E-05 | 0.00032 | -2.7862 | 5.00E-05 | 0.00038 |
| <b>Plekha2</b>       | -2.1202 | 5.00E-05 | 0.00032 | -1.63   | 5.00E-05 | 0.00038 |
| <b>Pdpr</b>          | -2.1223 | 0.00015  | 0.00086 | -1.8885 | 2.00E-04 | 0.00131 |
| <b>Arhgef10l</b>     | -2.1239 | 5.00E-05 | 0.00032 | -2.5011 | 5.00E-05 | 0.00038 |
| <b>Mypop</b>         | -2.124  | 5.00E-05 | 0.00032 | -1.8191 | 5.00E-05 | 0.00038 |
| <b>Ret</b>           | -2.1243 | 5.00E-05 | 0.00032 | -1.8217 | 5.00E-05 | 0.00038 |
| <b>Lrrn4cl</b>       | -2.1256 | 5.00E-05 | 0.00032 | -1.5744 | 0.0019   | 0.0088  |
| <b>Paqr9</b>         | -2.1274 | 8.00E-04 | 0.00368 | -3.0301 | 5.00E-04 | 0.00287 |
| <b>Pcolce</b>        | -2.1296 | 5.00E-05 | 0.00032 | -2.6391 | 5.00E-05 | 0.00038 |
| <b>Dhcr7</b>         | -2.1408 | 0.00015  | 0.00086 | -3.0938 | 5.00E-05 | 0.00038 |
| <b>Rgma</b>          | -2.1409 | 5.00E-05 | 0.00032 | -1.7832 | 5.00E-05 | 0.00038 |
| <b>Tomm40l</b>       | -2.1424 | 5.00E-05 | 0.00032 | -2.9176 | 5.00E-05 | 0.00038 |
| <b>9330159F19Rik</b> | -2.1485 | 5.00E-05 | 0.00032 | -2.2993 | 5.00E-05 | 0.00038 |
| <b>Gpam</b>          | -2.1566 | 5.00E-05 | 0.00032 | -3.2898 | 5.00E-05 | 0.00038 |
| <b>Il15</b>          | -2.1567 | 5.00E-05 | 0.00032 | -1.3446 | 0.00185  | 0.00861 |
| <b>Tpk1</b>          | -2.1588 | 0.0069   | 0.02243 | -4.2054 | 5.00E-05 | 0.00038 |
| <b>Tmem109</b>       | -2.1632 | 5.00E-05 | 0.00032 | -3.0493 | 5.00E-05 | 0.00038 |
| <b>Ccdc88c</b>       | -2.1641 | 5.00E-05 | 0.00032 | -1.7875 | 5.00E-05 | 0.00038 |
| <b>Naalad2</b>       | -2.1696 | 5.00E-05 | 0.00032 | -2.059  | 5.00E-05 | 0.00038 |
| <b>Kbtbd3</b>        | -2.1698 | 5.00E-05 | 0.00032 | -2.1705 | 5.00E-05 | 0.00038 |
| <b>E130308A19Rik</b> | -2.1707 | 5.00E-05 | 0.00032 | -1.405  | 0.00105  | 0.00534 |
| <b>Alkbh4</b>        | -2.1707 | 5.00E-05 | 0.00032 | -1.8095 | 6.00E-04 | 0.00335 |
| <b>Adcy7</b>         | -2.1713 | 5.00E-05 | 0.00032 | -2.361  | 5.00E-05 | 0.00038 |
| <b>D430041D05Rik</b> | -2.1729 | 0.00075  | 0.00349 | -2.5002 | 0.0023   | 0.01029 |
| <b>Tmtc2</b>         | -2.1737 | 0.00105  | 0.00462 | -1.869  | 0.0024   | 0.01064 |
| <b>Prss23</b>        | -2.185  | 5.00E-05 | 0.00032 | -1.6965 | 5.00E-05 | 0.00038 |
| <b>H2-Aa</b>         | -2.1925 | 0.0014   | 0.00591 | -1.4225 | 0.00865  | 0.0303  |
| <b>Frat2</b>         | -2.1929 | 5.00E-05 | 0.00032 | -1.9733 | 5.00E-05 | 0.00038 |
| <b>Filip1l</b>       | -2.1931 | 5.00E-05 | 0.00032 | -2.06   | 5.00E-05 | 0.00038 |
| <b>Tnxb</b>          | -2.1952 | 5.00E-05 | 0.00032 | -1.6711 | 5.00E-05 | 0.00038 |
| <b>Plxna4</b>        | -2.1979 | 5.00E-05 | 0.00032 | -2.4116 | 5.00E-05 | 0.00038 |
| <b>Pcp4l1</b>        | -2.1986 | 5.00E-05 | 0.00032 | -1.7295 | 5.00E-05 | 0.00038 |
| <b>Osbpl6</b>        | -2.2027 | 1.00E-04 | 0.0006  | -2.6495 | 0.00025  | 0.00159 |
| <b>Cyp39a1</b>       | -2.2033 | 5.00E-05 | 0.00032 | -1.6578 | 5.00E-05 | 0.00038 |
| <b>Meox1</b>         | -2.2073 | 0.00205  | 0.00814 | -1.8906 | 5.00E-05 | 0.00038 |
| <b>Gm10033</b>       | -2.2153 | 5.00E-04 | 0.00244 | -1.9533 | 0.00205  | 0.00937 |
| <b>Ttll1</b>         | -2.2154 | 0.00015  | 0.00086 | -2.1271 | 5.00E-05 | 0.00038 |
| <b>Lig4</b>          | -2.2154 | 5.00E-05 | 0.00032 | -2.0399 | 5.00E-05 | 0.00038 |
| <b>Exd2</b>          | -2.2197 | 5.00E-05 | 0.00032 | -2.771  | 5.00E-05 | 0.00038 |

|                      |         |          |         |         |          |         |
|----------------------|---------|----------|---------|---------|----------|---------|
| <b>Reep1</b>         | -2.2222 | 5.00E-05 | 0.00032 | -3.8234 | 5.00E-05 | 0.00038 |
| <b>2510009E07Rik</b> | -2.2261 | 5.00E-05 | 0.00032 | -2.4679 | 5.00E-05 | 0.00038 |
| <b>Emid1</b>         | -2.2273 | 5.00E-05 | 0.00032 | -1.8604 | 0.0022   | 0.00992 |
| <b>Sh3bgr</b>        | -2.2317 | 5.00E-05 | 0.00032 | -3.0525 | 5.00E-05 | 0.00038 |
| <b>Gpc6</b>          | -2.2325 | 5.00E-05 | 0.00032 | -1.3217 | 0.00135  | 0.00662 |
| <b>Asb18</b>         | -2.2333 | 5.00E-05 | 0.00032 | -5.5329 | 5.00E-05 | 0.00038 |
| <b>Antxr2</b>        | -2.2381 | 5.00E-05 | 0.00032 | -2.0976 | 5.00E-05 | 0.00038 |
| <b>Serpine2</b>      | -2.2386 | 5.00E-05 | 0.00032 | -2.567  | 5.00E-05 | 0.00038 |
| <b>Ncs1</b>          | -2.2395 | 2.00E-04 | 0.00111 | -2.2881 | 5.00E-05 | 0.00038 |
| <b>G0s2</b>          | -2.2427 | 5.00E-05 | 0.00032 | -3.5101 | 5.00E-05 | 0.00038 |
| <b>Tmc7</b>          | -2.25   | 5.00E-05 | 0.00032 | -3.7999 | 5.00E-05 | 0.00038 |
| <b>Cd59b</b>         | -2.2534 | 5.00E-05 | 0.00032 | -2.2569 | 2.00E-04 | 0.00131 |
| <b>Oas12</b>         | -2.2635 | 0.0014   | 0.00591 | -1.6214 | 0.0059   | 0.02212 |
| <b>Tmtc1</b>         | -2.2682 | 5.00E-05 | 0.00032 | -1.9055 | 5.00E-05 | 0.00038 |
| <b>Synpo2l</b>       | -2.269  | 5.00E-05 | 0.00032 | -2.415  | 5.00E-05 | 0.00038 |
| <b>Smtnl2</b>        | -2.2692 | 5.00E-05 | 0.00032 | -3.064  | 5.00E-05 | 0.00038 |
| <b>Mcm2</b>          | -2.2704 | 5.00E-05 | 0.00032 | -2.0235 | 5.00E-05 | 0.00038 |
| <b>Hdac9</b>         | -2.2712 | 5.00E-05 | 0.00032 | -2.6678 | 5.00E-05 | 0.00038 |
| <b>Egflam</b>        | -2.2748 | 5.00E-05 | 0.00032 | -2.9467 | 5.00E-05 | 0.00038 |
| <b>Chrne</b>         | -2.2749 | 5.00E-05 | 0.00032 | -1.9687 | 5.00E-05 | 0.00038 |
| <b>Ndn</b>           | -2.2835 | 5.00E-05 | 0.00032 | -2.6279 | 5.00E-05 | 0.00038 |
| <b>Mettl11b</b>      | -2.2842 | 5.00E-05 | 0.00032 | -3.9527 | 5.00E-05 | 0.00038 |
| <b>Ccdc3</b>         | -2.2842 | 5.00E-05 | 0.00032 | -1.4044 | 9.00E-04 | 0.0047  |
| <b>Cma1</b>          | -2.286  | 0.00015  | 0.00086 | -2.7427 | 0.00305  | 0.01292 |
| <b>Celsr2</b>        | -2.2862 | 0.0045   | 0.01571 | -2.5089 | 0.00275  | 0.01187 |
| <b>Kcp</b>           | -2.2881 | 0.0014   | 0.00591 | -3.4856 | 5.00E-05 | 0.00038 |
| <b>Gng7</b>          | -2.2943 | 0.0016   | 0.00663 | -2.5234 | 0.00085  | 0.00449 |
| <b>Tmem232</b>       | -2.2967 | 5.00E-05 | 0.00032 | -2.6748 | 5.00E-05 | 0.00038 |
| <b>Atp1b2</b>        | -2.2969 | 5.00E-05 | 0.00032 | -3.8384 | 5.00E-05 | 0.00038 |
| <b>Psd3</b>          | -2.2981 | 5.00E-05 | 0.00032 | -2.8076 | 5.00E-05 | 0.00038 |
| <b>H2-DMa</b>        | -2.3057 | 0.00385  | 0.01375 | -2.0845 | 0.00765  | 0.02745 |
| <b>Tmeff2</b>        | -2.3071 | 0.00805  | 0.0255  | -2.6414 | 0.00495  | 0.01919 |
| <b>Hspb3</b>         | -2.3121 | 5.00E-05 | 0.00032 | -3.9539 | 5.00E-05 | 0.00038 |
| <b>Cercam</b>        | -2.3123 | 0.0044   | 0.01543 | -2.8103 | 5.00E-05 | 0.00038 |
| <b>Sel1l3</b>        | -2.3254 | 5.00E-05 | 0.00032 | -3.0917 | 5.00E-05 | 0.00038 |
| <b>P2ry1</b>         | -2.3308 | 5.00E-05 | 0.00032 | -3.3889 | 5.00E-05 | 0.00038 |
| <b>Pla2g5</b>        | -2.3382 | 0.00465  | 0.01614 | #NAME?  | 5.00E-05 | 0.00038 |
| <b>Gsta4</b>         | -2.3551 | 5.00E-05 | 0.00032 | -2.2048 | 5.00E-05 | 0.00038 |
| <b>Cd276</b>         | -2.3631 | 5.00E-05 | 0.00032 | -1.8347 | 5.00E-05 | 0.00038 |
| <b>Rarb</b>          | -2.3643 | 5.00E-05 | 0.00032 | -2.0958 | 5.00E-05 | 0.00038 |
| <b>Polk</b>          | -2.3667 | 5.00E-05 | 0.00032 | -1.0233 | 0.00405  | 0.01634 |



|                      |         |          |         |         |          |         |
|----------------------|---------|----------|---------|---------|----------|---------|
| <b>Armcx4</b>        | -2.3693 | 5.00E-05 | 0.00032 | -3.1505 | 5.00E-05 | 0.00038 |
| <b>Rsph1</b>         | -2.3745 | 0.0067   | 0.02193 | -2.7783 | 0.00135  | 0.00662 |
| <b>Adora1</b>        | -2.3816 | 6.00E-04 | 0.00286 | -4.9654 | 5.00E-05 | 0.00038 |
| <b>9030612E09Rik</b> | -2.385  | 0.0029   | 0.0109  | -3.0294 | 0.00065  | 0.00359 |
| <b>Ccnd1</b>         | -2.3911 | 0.0097   | 0.02972 | -2.681  | 0.00365  | 0.01502 |
| <b>Mfap5</b>         | -2.3967 | 5.00E-05 | 0.00032 | -2.3446 | 5.00E-05 | 0.00038 |
| <b>Mmp23</b>         | -2.4013 | 0.00495  | 0.01705 | -3.3723 | 0.00065  | 0.00359 |
| <b>Xylt1</b>         | -2.4067 | 0.00035  | 0.00181 | -2.0665 | 0.0062   | 0.02306 |
| <b>Lgi2</b>          | -2.4074 | 5.00E-05 | 0.00032 | -3.5652 | 5.00E-05 | 0.00038 |
| <b>Serpina1b</b>     | -2.4097 | 5.00E-05 | 0.00032 | 1.04893 | 0.01455  | 0.04583 |
| <b>Chrdl1</b>        | -2.4141 | 5.00E-05 | 0.00032 | -1.6033 | 0.00055  | 0.00312 |
| <b>Nfatc2</b>        | -2.4175 | 5.00E-05 | 0.00032 | -2.2467 | 5.00E-05 | 0.00038 |
| <b>Bcl6</b>          | -2.4193 | 5.00E-05 | 0.00032 | -1.8147 | 5.00E-05 | 0.00038 |
| <b>Fam189b</b>       | -2.4201 | 5.00E-05 | 0.00032 | -2.9681 | 5.00E-05 | 0.00038 |
| <b>Zc4h2</b>         | -2.4258 | 0.00245  | 0.00945 | -2.4225 | 4.00E-04 | 0.00237 |
| <b>Ociad2</b>        | -2.4354 | 5.00E-05 | 0.00032 | -2.9457 | 5.00E-05 | 0.00038 |
| <b>Ttyh2</b>         | -2.4359 | 5.00E-05 | 0.00032 | -2.741  | 5.00E-05 | 0.00038 |
| <b>Thbs4</b>         | -2.4385 | 5.00E-05 | 0.00032 | -3.5897 | 5.00E-05 | 0.00038 |
| <b>Steap3</b>        | -2.4401 | 5.00E-05 | 0.00032 | -2.8153 | 5.00E-05 | 0.00038 |
| <b>Grb14</b>         | -2.4458 | 5.00E-05 | 0.00032 | -3.0744 | 5.00E-05 | 0.00038 |
| <b>Zfp108</b>        | -2.4474 | 0.0024   | 0.00929 | -2.1038 | 0.00285  | 0.01222 |
| <b>Efhd1</b>         | -2.4523 | 5.00E-05 | 0.00032 | -2.1455 | 0.00055  | 0.00312 |
| <b>Popdc2</b>        | -2.4529 | 3.00E-04 | 0.00158 | -2.8855 | 0.004    | 0.01623 |
| <b>Calm3</b>         | -2.453  | 5.00E-05 | 0.00032 | -3.2573 | 5.00E-05 | 0.00038 |
| <b>Fam114a1</b>      | -2.4561 | 5.00E-05 | 0.00032 | -2.4531 | 5.00E-05 | 0.00038 |
| <b>Ust</b>           | -2.4585 | 0.0016   | 0.00663 | -1.7747 | 0.00445  | 0.01765 |
| <b>Pgm2</b>          | -2.4594 | 5.00E-05 | 0.00032 | -3.261  | 5.00E-05 | 0.00038 |
| <b>Tmx2</b>          | -2.4659 | 0.00015  | 0.00086 | -3.3856 | 0.0039   | 0.01589 |
| <b>Pcyox1</b>        | -2.4711 | 5.00E-05 | 0.00032 | -3.1898 | 5.00E-05 | 0.00038 |
| <b>Myod1</b>         | -2.4722 | 5.00E-05 | 0.00032 | -3.0616 | 5.00E-05 | 0.00038 |
| <b>Sh3kbp1</b>       | -2.4724 | 5.00E-05 | 0.00032 | -2.3837 | 5.00E-05 | 0.00038 |
| <b>H2-Ab1</b>        | -2.4726 | 0.00495  | 0.01705 | -2.0578 | 0.0114   | 0.03786 |
| <b>Neu2</b>          | -2.4765 | 5.00E-05 | 0.00032 | -3.4621 | 5.00E-05 | 0.00038 |
| <b>Naaa</b>          | -2.4797 | 5.00E-05 | 0.00032 | -1.9971 | 0.00015  | 0.00102 |
| <b>Ppapdc3</b>       | -2.4842 | 5.00E-05 | 0.00032 | -3.6967 | 5.00E-05 | 0.00038 |
| <b>Ccdc80</b>        | -2.4847 | 5.00E-05 | 0.00032 | -2.4554 | 5.00E-05 | 0.00038 |
| <b>Zfp273</b>        | -2.4857 | 0.0125   | 0.03659 | -2.6602 | 0.00225  | 0.0101  |
| <b>Tnk2</b>          | -2.498  | 5.00E-05 | 0.00032 | -2.9458 | 5.00E-05 | 0.00038 |
| <b>Olfml2a</b>       | -2.502  | 5.00E-05 | 0.00032 | -2.2815 | 5.00E-05 | 0.00038 |
| <b>Nipa1</b>         | -2.5032 | 5.00E-05 | 0.00032 | -2.2917 | 5.00E-05 | 0.00038 |
| <b>Ampd1</b>         | -2.5299 | 5.00E-05 | 0.00032 | -4.4292 | 5.00E-05 | 0.00038 |

|               |         |          |         |         |          |         |
|---------------|---------|----------|---------|---------|----------|---------|
| Postn         | -2.5311 | 5.00E-05 | 0.00032 | -3.3252 | 5.00E-05 | 0.00038 |
| Dagla         | -2.5362 | 5.00E-05 | 0.00032 | -2.8775 | 5.00E-05 | 0.00038 |
| Gm17447       | -2.5469 | 3.00E-04 | 0.00158 | -1.4593 | 0.0084   | 0.0296  |
| Krt222        | -2.5476 | 5.00E-05 | 0.00032 | -2.9845 | 5.00E-05 | 0.00038 |
| Clcn1         | -2.5633 | 5.00E-05 | 0.00032 | -3.7123 | 5.00E-05 | 0.00038 |
| Mtap9         | -2.5665 | 2.00E-04 | 0.00111 | -2.9333 | 0.00015  | 0.00102 |
| Dpt           | -2.5727 | 5.00E-05 | 0.00032 | -3.303  | 5.00E-05 | 0.00038 |
| 0610040J01Rik | -2.5745 | 5.00E-05 | 0.00032 | -1.4478 | 5.00E-04 | 0.00287 |
| Trim7         | -2.5816 | 5.00E-05 | 0.00032 | -3.8086 | 5.00E-05 | 0.00038 |
| Zfp41         | -2.5826 | 0.00105  | 0.00462 | -2.322  | 0.00245  | 0.01083 |
| Gm17552       | -2.5838 | 5.00E-05 | 0.00032 | -2.7923 | 0.00085  | 0.00449 |
| Six2          | -2.5854 | 5.00E-05 | 0.00032 | -2.5165 | 5.00E-05 | 0.00038 |
| Gdf11         | -2.5916 | 5.00E-05 | 0.00032 | -2.8216 | 5.00E-05 | 0.00038 |
| Tnfaip2       | -2.593  | 5.00E-05 | 0.00032 | -2.1436 | 5.00E-05 | 0.00038 |
| Mrc1          | -2.5963 | 5.00E-05 | 0.00032 | -2.5589 | 5.00E-05 | 0.00038 |
| Lrrc17        | -2.604  | 0.00185  | 0.00749 | -1.6752 | 0.0115   | 0.03812 |
| Katnal2       | -2.6056 | 5.00E-05 | 0.00032 | 1.97863 | 0.00125  | 0.00621 |
| Alg2          | -2.6097 | 5.00E-05 | 0.00032 | -2.6412 | 5.00E-05 | 0.00038 |
| Pak1          | -2.6316 | 5.00E-05 | 0.00032 | -3.2402 | 5.00E-05 | 0.00038 |
| Gm5113        | -2.6361 | 5.00E-05 | 0.00032 | -3.3888 | 5.00E-05 | 0.00038 |
| Vit           | -2.6376 | 5.00E-05 | 0.00032 | -1.8192 | 0.00095  | 0.00492 |
| Bhlhe41       | -2.6532 | 5.00E-05 | 0.00032 | -2.3298 | 5.00E-05 | 0.00038 |
| Rab40b        | -2.6547 | 5.00E-05 | 0.00032 | -3.0696 | 5.00E-05 | 0.00038 |
| Plekha6       | -2.6608 | 5.00E-05 | 0.00032 | -4.3665 | 5.00E-05 | 0.00038 |
| Zfp354c       | -2.6718 | 2.00E-04 | 0.00111 | -1.6936 | 2.00E-04 | 0.00131 |
| Smarca1       | -2.6823 | 5.00E-05 | 0.00032 | -2.4159 | 5.00E-05 | 0.00038 |
| Ptpns         | -2.6859 | 5.00E-05 | 0.00032 | -3.2862 | 5.00E-05 | 0.00038 |
| Zfp54         | -2.6893 | 0.008    | 0.02536 | -2.3864 | 0.01485  | 0.04659 |
| 2310010M20Rik | -2.6943 | 5.00E-05 | 0.00032 | -3.9307 | 5.00E-05 | 0.00038 |
| Caprin2       | -2.6947 | 3.00E-04 | 0.00158 | -2.3116 | 0.0016   | 0.00763 |
| Mef2c         | -2.6974 | 5.00E-05 | 0.00032 | -3.7478 | 5.00E-05 | 0.00038 |
| Carns1        | -2.7032 | 5.00E-05 | 0.00032 | -2.7204 | 5.00E-05 | 0.00038 |
| Sorl1         | -2.7097 | 5.00E-05 | 0.00032 | -2.0622 | 5.00E-05 | 0.00038 |
| Tgfb2         | -2.722  | 5.00E-05 | 0.00032 | -2.5808 | 5.00E-05 | 0.00038 |
| Xrcc5         | -2.7222 | 5.00E-05 | 0.00032 | -3.0668 | 5.00E-05 | 0.00038 |
| Aplnr         | -2.7351 | 5.00E-05 | 0.00032 | -4.5684 | 5.00E-05 | 0.00038 |
| Rasgrp3       | -2.7442 | 5.00E-05 | 0.00032 | -3.4193 | 5.00E-05 | 0.00038 |
| Ccdc69        | -2.7477 | 5.00E-05 | 0.00032 | -3.7813 | 5.00E-05 | 0.00038 |
| Aldh18a1      | -2.7546 | 0.00465  | 0.01614 | -1.8793 | 0.01435  | 0.04542 |
| Ces1d         | -2.7573 | 5.00E-05 | 0.00032 | -2.6551 | 5.00E-05 | 0.00038 |
| Pnck          | -2.7659 | 5.00E-05 | 0.00032 | -2.1693 | 5.00E-05 | 0.00038 |

|                      |         |          |         |         |          |         |
|----------------------|---------|----------|---------|---------|----------|---------|
| <b>Mcpt4</b>         | -2.7704 | 4.00E-04 | 0.00203 | -3.9821 | 0.016    | 0.04944 |
| <b>Ifit3</b>         | -2.7752 | 5.00E-05 | 0.00032 | -2.4777 | 0.0053   | 0.02027 |
| <b>Cc2d2a</b>        | -2.7775 | 5.00E-05 | 0.00032 | -2.0973 | 5.00E-05 | 0.00038 |
| <b>Dnm1</b>          | -2.7784 | 0.0032   | 0.01181 | -2.9988 | 0.0065   | 0.02397 |
| <b>Ormdl1</b>        | -2.7902 | 5.00E-05 | 0.00032 | -2.6078 | 5.00E-05 | 0.00038 |
| <b>Podn</b>          | -2.7917 | 5.00E-05 | 0.00032 | -2.1639 | 0.00015  | 0.00102 |
| <b>B930041F14Rik</b> | -2.7959 | 7.00E-04 | 0.00328 | -1.876  | 0.00125  | 0.00621 |
| <b>Ogn</b>           | -2.8005 | 5.00E-05 | 0.00032 | -2.9262 | 9.00E-04 | 0.0047  |
| <b>Acpl2</b>         | -2.82   | 0.00095  | 0.00425 | -1.9208 | 0.0041   | 0.0165  |
| <b>Fbln7</b>         | -2.8207 | 4.00E-04 | 0.00203 | -2.1137 | 5.00E-05 | 0.00038 |
| <b>Cd248</b>         | -2.8226 | 5.00E-05 | 0.00032 | -2.6699 | 5.00E-05 | 0.00038 |
| <b>Best3</b>         | -2.8365 | 5.00E-05 | 0.00032 | -3.6454 | 5.00E-05 | 0.00038 |
| <b>Gpr155</b>        | -2.8446 | 5.00E-05 | 0.00032 | -2.0351 | 5.00E-05 | 0.00038 |
| <b>Hpd1</b>          | -2.8452 | 0.0045   | 0.01571 | -3.2993 | 0.00125  | 0.00621 |
| <b>Nmral1</b>        | -2.8471 | 5.00E-05 | 0.00032 | -2.8438 | 4.00E-04 | 0.00237 |
| <b>Crip3</b>         | -2.8646 | 0.0015   | 0.00627 | -3.9258 | 6.00E-04 | 0.00335 |
| <b>Fer116</b>        | -2.8673 | 5.00E-05 | 0.00032 | -4.463  | 5.00E-05 | 0.00038 |
| <b>Kcnab1</b>        | -2.8682 | 5.00E-05 | 0.00032 | -1.0129 | 0.0139   | 0.04433 |
| <b>Sobp</b>          | -2.8687 | 5.00E-05 | 0.00032 | -3.2402 | 5.00E-05 | 0.00038 |
| <b>Bpgm</b>          | -2.8707 | 5.00E-05 | 0.00032 | -3.435  | 5.00E-05 | 0.00038 |
| <b>Dusp10</b>        | -2.8724 | 5.00E-05 | 0.00032 | -4.9174 | 5.00E-05 | 0.00038 |
| <b>Akr1c14</b>       | -2.8767 | 0.00055  | 0.00266 | -0.9322 | 0.0102   | 0.03456 |
| <b>Zmynd17</b>       | -2.8777 | 5.00E-05 | 0.00032 | -3.2273 | 5.00E-05 | 0.00038 |
| <b>Gm12319</b>       | -2.8785 | 5.00E-05 | 0.00032 | -4.6762 | 5.00E-05 | 0.00038 |
| <b>Relt</b>          | -2.8832 | 5.00E-05 | 0.00032 | -2.3614 | 5.00E-05 | 0.00038 |
| <b>F13a1</b>         | -2.8833 | 5.00E-05 | 0.00032 | -1.0541 | 0.00575  | 0.02167 |
| <b>Adamts11</b>      | -2.8911 | 5.00E-05 | 0.00032 | -1.905  | 0.00125  | 0.00621 |
| <b>Tceal5</b>        | -2.8928 | 5.00E-05 | 0.00032 | -2.5584 | 5.00E-05 | 0.00038 |
| <b>4933404O12Rik</b> | -2.9057 | 5.00E-05 | 0.00032 | -3.6604 | 5.00E-05 | 0.00038 |
| <b>Myoc</b>          | -2.9279 | 5.00E-05 | 0.00032 | -1.7683 | 5.00E-05 | 0.00038 |
| <b>1110002E22Rik</b> | -2.9305 | 5.00E-05 | 0.00032 | -4.0577 | 5.00E-05 | 0.00038 |
| <b>Zfp503</b>        | -2.9306 | 5.00E-05 | 0.00032 | -1.7956 | 5.00E-05 | 0.00038 |
| <b>Aimp2</b>         | -2.9342 | 5.00E-05 | 0.00032 | -2.6438 | 0.00015  | 0.00102 |
| <b>Gpd1</b>          | -2.953  | 5.00E-05 | 0.00032 | -4.3092 | 5.00E-05 | 0.00038 |
| <b>Ppargc1b</b>      | -2.9531 | 5.00E-05 | 0.00032 | -2.5919 | 2.00E-04 | 0.00131 |
| <b>Islr</b>          | -2.9606 | 5.00E-05 | 0.00032 | -3.3401 | 5.00E-05 | 0.00038 |
| <b>3632451O06Rik</b> | -2.9744 | 5.00E-05 | 0.00032 | -1.8104 | 3.00E-04 | 0.00184 |
| <b>Camk2a</b>        | -2.9761 | 5.00E-05 | 0.00032 | -4.3774 | 5.00E-05 | 0.00038 |
| <b>Rcn3</b>          | -3.0053 | 5.00E-05 | 0.00032 | -3.3393 | 5.00E-05 | 0.00038 |
| <b>Cacna2d4</b>      | -3.0074 | 5.00E-05 | 0.00032 | -5.5699 | 0.00015  | 0.00102 |
| <b>Phka1</b>         | -3.0074 | 5.00E-05 | 0.00032 | -3.3554 | 5.00E-05 | 0.00038 |

|                      |         |          |         |         |          |         |
|----------------------|---------|----------|---------|---------|----------|---------|
| <b>Fam131a</b>       | -3.0099 | 5.00E-05 | 0.00032 | -3.3317 | 1.00E-04 | 0.00072 |
| <b>Kctd15</b>        | -3.0157 | 5.00E-05 | 0.00032 | -3.257  | 5.00E-05 | 0.00038 |
| <b>Ak4</b>           | -3.017  | 5.00E-05 | 0.00032 | -1.7809 | 5.00E-05 | 0.00038 |
| <b>Angptl1</b>       | -3.0183 | 5.00E-05 | 0.00032 | -3.7185 | 5.00E-05 | 0.00038 |
| <b>Folr2</b>         | -3.0286 | 1.00E-04 | 0.0006  | -2.283  | 7.00E-04 | 0.00383 |
| <b>Gm16170</b>       | -3.0291 | 0.00035  | 0.00181 | -3.0241 | 0.00705  | 0.02568 |
| <b>Ftsj2</b>         | -3.0355 | 0.00015  | 0.00086 | -3.0899 | 5.00E-05 | 0.00038 |
| <b>D1Ert622e</b>     | -3.0382 | 5.00E-05 | 0.00032 | -2.0827 | 5.00E-05 | 0.00038 |
| <b>Itgb1</b>         | -3.0408 | 5.00E-05 | 0.00032 | -2.7778 | 5.00E-05 | 0.00038 |
| <b>Col6a1</b>        | -3.041  | 5.00E-05 | 0.00032 | -4.1851 | 5.00E-05 | 0.00038 |
| <b>Col5a1</b>        | -3.0481 | 5.00E-05 | 0.00032 | -3.4415 | 5.00E-05 | 0.00038 |
| <b>Hdhd3</b>         | -3.0516 | 0.00045  | 0.00224 | -4.2838 | 0.0036   | 0.01484 |
| <b>Igtp</b>          | -3.0556 | 5.00E-05 | 0.00032 | -1.829  | 5.00E-05 | 0.00038 |
| <b>Abcd2</b>         | -3.0822 | 5.00E-05 | 0.00032 | -3.9023 | 5.00E-05 | 0.00038 |
| <b>Col3a1</b>        | -3.1013 | 5.00E-05 | 0.00032 | -5.1481 | 5.00E-05 | 0.00038 |
| <b>Tmem14a</b>       | -3.1085 | 0.0018   | 0.00733 | -3.1811 | 0.00175  | 0.00822 |
| <b>Zfp385b</b>       | -3.1165 | 5.00E-05 | 0.00032 | -2.7483 | 5.00E-05 | 0.00038 |
| <b>Col14a1</b>       | -3.1201 | 5.00E-05 | 0.00032 | -4.3637 | 5.00E-05 | 0.00038 |
| <b>Nudt1</b>         | -3.1202 | 0.00295  | 0.01104 | -2.6815 | 0.0016   | 0.00763 |
| <b>ORF63</b>         | -3.1283 | 5.00E-05 | 0.00032 | -4.9075 | 5.00E-05 | 0.00038 |
| <b>Myoz3</b>         | -3.1398 | 5.00E-05 | 0.00032 | -3.4394 | 5.00E-05 | 0.00038 |
| <b>Synpo2</b>        | -3.151  | 5.00E-05 | 0.00032 | -3.6909 | 5.00E-05 | 0.00038 |
| <b>1700123M08Rik</b> | -3.1598 | 5.00E-05 | 0.00032 | -3.098  | 5.00E-05 | 0.00038 |
| <b>Ppil1</b>         | -3.1745 | 5.00E-05 | 0.00032 | -2.9329 | 5.00E-05 | 0.00038 |
| <b>Lrp2bp</b>        | -3.189  | 0.0019   | 0.00766 | -4.3448 | 0.0026   | 0.01132 |
| <b>Tmem25</b>        | -3.1947 | 5.00E-05 | 0.00032 | -4.0681 | 5.00E-05 | 0.00038 |
| <b>Itm2a</b>         | -3.2041 | 5.00E-05 | 0.00032 | -5.1479 | 5.00E-05 | 0.00038 |
| <b>Kazald1</b>       | -3.2057 | 5.00E-05 | 0.00032 | -3.4027 | 5.00E-05 | 0.00038 |
| <b>Mmp15</b>         | -3.2265 | 5.00E-05 | 0.00032 | -4.1675 | 5.00E-05 | 0.00038 |
| <b>Fn1</b>           | -3.2275 | 5.00E-05 | 0.00032 | -2.7864 | 5.00E-05 | 0.00038 |
| <b>Clec3b</b>        | -3.2344 | 5.00E-05 | 0.00032 | -2.8386 | 5.00E-05 | 0.00038 |
| <b>Ache</b>          | -3.2347 | 5.00E-05 | 0.00032 | -3.7216 | 5.00E-05 | 0.00038 |
| <b>Atp1b4</b>        | -3.2387 | 5.00E-05 | 0.00032 | -5.2847 | 5.00E-05 | 0.00038 |
| <b>Vash2</b>         | -3.2468 | 2.00E-04 | 0.00111 | -1.3452 | 0.01095  | 0.03665 |
| <b>Sema6c</b>        | -3.2565 | 5.00E-05 | 0.00032 | -4.1058 | 5.00E-05 | 0.00038 |
| <b>Ptx3</b>          | -3.2597 | 5.00E-05 | 0.00032 | -5.1563 | 0.00085  | 0.00449 |
| <b>Neto2</b>         | -3.2682 | 5.00E-05 | 0.00032 | -2.12   | 5.00E-05 | 0.00038 |
| <b>Fsd1l</b>         | -3.2844 | 5.00E-05 | 0.00032 | -3.0937 | 5.00E-05 | 0.00038 |
| <b>Slc37a4</b>       | -3.2974 | 5.00E-05 | 0.00032 | -4.4856 | 5.00E-05 | 0.00038 |
| <b>Gfra2</b>         | -3.2977 | 0.00035  | 0.00181 | -2.91   | 0.00195  | 0.00898 |
| <b>Pla2g7</b>        | -3.313  | 5.00E-05 | 0.00032 | -0.9166 | 0.0048   | 0.01873 |

|                      |         |          |         |         |          |         |
|----------------------|---------|----------|---------|---------|----------|---------|
| <b>Smox</b>          | -3.3134 | 5.00E-05 | 0.00032 | -1.673  | 5.00E-05 | 0.00038 |
| <b>Mamstr</b>        | -3.315  | 5.00E-05 | 0.00032 | -3.4187 | 5.00E-05 | 0.00038 |
| <b>Sertad4</b>       | -3.3218 | 1.00E-04 | 0.0006  | -3.3646 | 3.00E-04 | 0.00184 |
| <b>Col6a2</b>        | -3.3252 | 5.00E-05 | 0.00032 | -4.8018 | 5.00E-05 | 0.00038 |
| <b>Arnt2</b>         | -3.3262 | 0.00025  | 0.00135 | -4.2405 | 5.00E-05 | 0.00038 |
| <b>Serpinb6b</b>     | -3.3264 | 0.0039   | 0.0139  | -3.8929 | 0.0013   | 0.00641 |
| <b>Pcolce2</b>       | -3.3332 | 5.00E-05 | 0.00032 | -2.5748 | 0.0019   | 0.0088  |
| <b>Serpinf1</b>      | -3.3383 | 5.00E-05 | 0.00032 | -4.1306 | 5.00E-05 | 0.00038 |
| <b>Mfap3l</b>        | -3.3639 | 5.00E-05 | 0.00032 | -4.1715 | 5.00E-05 | 0.00038 |
| <b>Pdp1</b>          | -3.3658 | 5.00E-05 | 0.00032 | -2.327  | 5.00E-05 | 0.00038 |
| <b>Ptn</b>           | -3.3696 | 0.01115  | 0.03321 | -2.7221 | 0.00375  | 0.01539 |
| <b>Frzb</b>          | -3.374  | 5.00E-05 | 0.00032 | -4.0272 | 5.00E-05 | 0.00038 |
| <b>Aurka</b>         | -3.3765 | 5.00E-05 | 0.00032 | -3.4258 | 5.00E-05 | 0.00038 |
| <b>Gamt</b>          | -3.3888 | 5.00E-05 | 0.00032 | -4.1514 | 5.00E-05 | 0.00038 |
| <b>Clec11a</b>       | -3.3918 | 9.00E-04 | 0.00406 | -4.0236 | 0.00055  | 0.00312 |
| <b>Mum11l</b>        | -3.404  | 0.00095  | 0.00425 | -4.7253 | 0.00025  | 0.00159 |
| <b>Wnt5a</b>         | -3.415  | 5.00E-05 | 0.00032 | -3.3331 | 5.00E-05 | 0.00038 |
| <b>Abi3bp</b>        | -3.4173 | 5.00E-05 | 0.00032 | -3.4242 | 5.00E-05 | 0.00038 |
| <b>Amd2</b>          | -3.4476 | 5.00E-05 | 0.00032 | -2.9074 | 5.00E-05 | 0.00038 |
| <b>Prph</b>          | -3.4512 | 0.0062   | 0.02061 | -2.8481 | 9.00E-04 | 0.0047  |
| <b>2310065F04Rik</b> | -3.4517 | 5.00E-05 | 0.00032 | -4.6362 | 5.00E-05 | 0.00038 |
| <b>Syt3</b>          | -3.4686 | 0.00335  | 0.01227 | -3.8295 | 5.00E-05 | 0.00038 |
| <b>Itga11</b>        | -3.474  | 5.00E-05 | 0.00032 | -3.448  | 5.00E-05 | 0.00038 |
| <b>Angptl2</b>       | -3.4787 | 5.00E-05 | 0.00032 | -3.5419 | 5.00E-05 | 0.00038 |
| <b>A430110N23Rik</b> | -3.4908 | 5.00E-05 | 0.00032 | -4.4338 | 5.00E-05 | 0.00038 |
| <b>Ms4a7</b>         | -3.5001 | 0.00505  | 0.01733 | -3.5323 | 0.0082   | 0.02904 |
| <b>Zfp493</b>        | -3.5115 | 0.0019   | 0.00766 | -5.0015 | 0.0101   | 0.03434 |
| <b>Ighm</b>          | -3.5153 | 5.00E-05 | 0.00032 | -6.4104 | 5.00E-05 | 0.00038 |
| <b>Nt5c1a</b>        | -3.52   | 5.00E-05 | 0.00032 | -5.0291 | 1.00E-04 | 0.00072 |
| <b>Ptgr1</b>         | -3.5224 | 0.01255  | 0.03669 | -2.9689 | 0.00185  | 0.00861 |
| <b>Plxnb3</b>        | -3.5365 | 5.00E-05 | 0.00032 | -2.0728 | 0.001    | 0.00513 |
| <b>4930444A02Rik</b> | -3.5366 | 5.00E-05 | 0.00032 | -4.1832 | 5.00E-05 | 0.00038 |
| <b>Gm8424</b>        | -3.5389 | 5.00E-05 | 0.00032 | -5.507  | 5.00E-05 | 0.00038 |
| <b>Maf</b>           | -3.5508 | 5.00E-05 | 0.00032 | -3.364  | 5.00E-05 | 0.00038 |
| <b>Epha7</b>         | -3.5513 | 0.00065  | 0.00308 | -2.4336 | 0.0018   | 0.00842 |
| <b>Mafa</b>          | -3.5723 | 5.00E-05 | 0.00032 | -3.0293 | 5.00E-05 | 0.00038 |
| <b>Kcnn2</b>         | -3.5733 | 0.00015  | 0.00086 | -3.6264 | 5.00E-05 | 0.00038 |
| <b>Efemp1</b>        | -3.5806 | 5.00E-05 | 0.00032 | -2.0036 | 3.00E-04 | 0.00184 |
| <b>Col6a3</b>        | -3.5883 | 5.00E-05 | 0.00032 | -5.6208 | 5.00E-05 | 0.00038 |
| <b>Jph2</b>          | -3.6256 | 5.00E-05 | 0.00032 | -4.4058 | 5.00E-05 | 0.00038 |
| <b>Mybph</b>         | -3.6367 | 5.00E-05 | 0.00032 | -5.751  | 5.00E-05 | 0.00038 |

|                      |         |          |         |         |          |         |
|----------------------|---------|----------|---------|---------|----------|---------|
| <b>Thy1</b>          | -3.6373 | 5.00E-05 | 0.00032 | -3.44   | 5.00E-05 | 0.00038 |
| <b>Wfdc1</b>         | -3.6586 | 5.00E-05 | 0.00032 | -3.847  | 5.00E-05 | 0.00038 |
| <b>4832428D23Rik</b> | -3.6693 | 5.00E-05 | 0.00032 | -4.7058 | 5.00E-05 | 0.00038 |
| <b>Amd1</b>          | -3.7186 | 5.00E-05 | 0.00032 | -2.9828 | 5.00E-05 | 0.00038 |
| <b>Itgb6</b>         | -3.7439 | 1.00E-04 | 0.0006  | -5.122  | 5.00E-05 | 0.00038 |
| <b>Lum</b>           | -3.7555 | 5.00E-05 | 0.00032 | -4.2161 | 5.00E-05 | 0.00038 |
| <b>Smpdl3b</b>       | -3.7947 | 1.00E-04 | 0.0006  | -2.7258 | 6.00E-04 | 0.00335 |
| <b>Duoxa1</b>        | -3.801  | 0.00235  | 0.00914 | -3.2969 | 0.00645  | 0.02382 |
| <b>Matn4</b>         | -3.8217 | 4.00E-04 | 0.00203 | -4.0655 | 5.00E-05 | 0.00038 |
| <b>Map2k6</b>        | -3.8351 | 5.00E-05 | 0.00032 | -3.9523 | 5.00E-05 | 0.00038 |
| <b>Tfrc</b>          | -3.8396 | 5.00E-05 | 0.00032 | -5.5471 | 5.00E-05 | 0.00038 |
| <b>Slc4a4</b>        | -3.8464 | 5.00E-05 | 0.00032 | -3.5333 | 5.00E-05 | 0.00038 |
| <b>Col11a2</b>       | -3.8479 | 5.00E-05 | 0.00032 | -2.7726 | 1.00E-04 | 0.00072 |
| <b>Zfp454</b>        | -3.8613 | 0.00015  | 0.00086 | -4.9021 | 1.00E-04 | 0.00072 |
| <b>Pi16</b>          | -3.8733 | 5.00E-05 | 0.00032 | -2.0857 | 5.00E-05 | 0.00038 |
| <b>Nkain1</b>        | -3.8734 | 5.00E-05 | 0.00032 | -4.6305 | 5.00E-05 | 0.00038 |
| <b>Tnc</b>           | -3.9105 | 5.00E-05 | 0.00032 | -4.3292 | 5.00E-05 | 0.00038 |
| <b>Stxbp4</b>        | -3.9174 | 5.00E-05 | 0.00032 | -4.4803 | 5.00E-05 | 0.00038 |
| <b>Igfbp5</b>        | -3.9992 | 5.00E-05 | 0.00032 | -3.9824 | 5.00E-05 | 0.00038 |
| <b>Sypl2</b>         | -4.0058 | 5.00E-05 | 0.00032 | -5.5138 | 5.00E-05 | 0.00038 |
| <b>Prkag3</b>        | -4.0357 | 5.00E-05 | 0.00032 | -4.3961 | 5.00E-05 | 0.00038 |
| <b>Papln</b>         | -4.0468 | 1.00E-04 | 0.0006  | -3.277  | 5.00E-05 | 0.00038 |
| <b>Cbr2</b>          | -4.0497 | 5.00E-05 | 0.00032 | -3.2547 | 1.00E-04 | 0.00072 |
| <b>Mpp3</b>          | -4.1133 | 5.00E-05 | 0.00032 | -3.5321 | 5.00E-05 | 0.00038 |
| <b>Igsf1</b>         | -4.1679 | 0.00375  | 0.01345 | -5.9406 | 0.0018   | 0.00842 |
| <b>Sfrp4</b>         | -4.1744 | 5.00E-05 | 0.00032 | -1.369  | 0.01195  | 0.03927 |
| <b>Slc8a3</b>        | -4.1751 | 5.00E-05 | 0.00032 | -3.6927 | 5.00E-05 | 0.00038 |
| <b>Col1a2</b>        | -4.1968 | 5.00E-05 | 0.00032 | -5.2415 | 5.00E-05 | 0.00038 |
| <b>A530098C11Rik</b> | -4.2244 | 5.00E-05 | 0.00032 | -5.5385 | 5.00E-05 | 0.00038 |
| <b>Agbl1</b>         | -4.2342 | 5.00E-05 | 0.00032 | -1.9288 | 0.00085  | 0.00449 |
| <b>Mdga1</b>         | -4.2416 | 5.00E-05 | 0.00032 | -3.2763 | 5.00E-05 | 0.00038 |
| <b>Frmd7</b>         | -4.2614 | 0.01755  | 0.04811 | -2.7995 | 0.0113   | 0.03759 |
| <b>Dkk3</b>          | -4.2992 | 5.00E-05 | 0.00032 | -2.4998 | 5.00E-05 | 0.00038 |
| <b>Tas1r1</b>        | -4.3029 | 5.00E-04 | 0.00244 | -5.3921 | 0.00255  | 0.01114 |
| <b>Casq1</b>         | -4.3506 | 5.00E-05 | 0.00032 | -5.5728 | 5.00E-05 | 0.00038 |
| <b>I830012O16Rik</b> | -4.3626 | 2.00E-04 | 0.00111 | -3.1116 | 5.00E-05 | 0.00038 |
| <b>BC023105</b>      | -4.3696 | 5.00E-05 | 0.00032 | -4.6015 | 5.00E-05 | 0.00038 |
| <b>Mylk4</b>         | -4.4351 | 5.00E-05 | 0.00032 | -7.4137 | 5.00E-05 | 0.00038 |
| <b>Itgb1bp3</b>      | -4.4548 | 1.00E-04 | 0.0006  | -4.8327 | 0.00105  | 0.00534 |
| <b>Cntfr</b>         | -4.4793 | 5.00E-05 | 0.00032 | -1.8334 | 5.00E-05 | 0.00038 |
| <b>Gm15676</b>       | -4.4847 | 5.00E-05 | 0.00032 | -6.7566 | 5.00E-05 | 0.00038 |

|                      |         |          |         |         |          |         |
|----------------------|---------|----------|---------|---------|----------|---------|
| <b>Foxo6</b>         | -4.4981 | 5.00E-05 | 0.00032 | -2.9079 | 5.00E-05 | 0.00038 |
| <b>Wif1</b>          | -4.5423 | 1.00E-04 | 0.0006  | -5.3305 | 0.001    | 0.00513 |
| <b>Kbtbd13</b>       | -4.5457 | 5.00E-05 | 0.00032 | -5.4205 | 0.00015  | 0.00102 |
| <b>Ntf5</b>          | -4.5834 | 5.00E-05 | 0.00032 | -5.0957 | 5.00E-05 | 0.00038 |
| <b>Kcnh2</b>         | -4.5896 | 1.00E-04 | 0.0006  | -2.1753 | 0.0066   | 0.02427 |
| <b>Sec14l5</b>       | -4.5984 | 5.00E-05 | 0.00032 | -5.9082 | 5.00E-05 | 0.00038 |
| <b>Casr</b>          | -4.6025 | 0.00015  | 0.00086 | -4.7895 | 0.0031   | 0.01309 |
| <b>Aqp4</b>          | -4.6973 | 5.00E-05 | 0.00032 | -6.3797 | 5.00E-05 | 0.00038 |
| <b>Lrtm2</b>         | -4.6987 | 5.00E-05 | 0.00032 | -5.4277 | 0.0077   | 0.0276  |
| <b>Pde4a</b>         | -4.7092 | 5.00E-05 | 0.00032 | -5.7622 | 5.00E-05 | 0.00038 |
| <b>Fndc1</b>         | -4.7212 | 5.00E-05 | 0.00032 | -2.3554 | 7.00E-04 | 0.00383 |
| <b>Cyp4f39</b>       | -4.8918 | 5.00E-05 | 0.00032 | -6.3076 | 5.00E-05 | 0.00038 |
| <b>Lingo3</b>        | -4.9562 | 5.00E-05 | 0.00032 | -4.0784 | 5.00E-05 | 0.00038 |
| <b>Col1a1</b>        | -4.9752 | 5.00E-05 | 0.00032 | -6.7076 | 5.00E-05 | 0.00038 |
| <b>Cerkl</b>         | -4.9859 | 5.00E-05 | 0.00032 | -2.1065 | 0.01445  | 0.04566 |
| <b>Cdh4</b>          | -5.0255 | 5.00E-05 | 0.00032 | -4.7218 | 5.00E-05 | 0.00038 |
| <b>Grem2</b>         | -5.0384 | 0.0102   | 0.03095 | -4.138  | 0.0101   | 0.03434 |
| <b>6430571L13Rik</b> | -5.1287 | 5.00E-05 | 0.00032 | -6.0883 | 5.00E-05 | 0.00038 |
| <b>Itga4</b>         | -5.1389 | 5.00E-05 | 0.00032 | -2.7782 | 5.00E-05 | 0.00038 |
| <b>Fmod</b>          | -5.488  | 5.00E-05 | 0.00032 | -6.6144 | 5.00E-05 | 0.00038 |
| <b>Comp</b>          | -5.5035 | 5.00E-05 | 0.00032 | -4.625  | 5.00E-05 | 0.00038 |
| <b>Tnmd</b>          | -5.5604 | 5.00E-05 | 0.00032 | -5.2895 | 5.00E-05 | 0.00038 |
| <b>Retnla</b>        | -5.6099 | 0.0122   | 0.03581 | -3.1116 | 1.00E-04 | 0.00072 |
| <b>D0H4S114</b>      | -5.7913 | 5.00E-05 | 0.00032 | -6.2357 | 5.00E-05 | 0.00038 |
| <b>Cilp2</b>         | -5.8481 | 3.00E-04 | 0.00158 | -6.1294 | 5.00E-05 | 0.00038 |
| <b>Kcng4</b>         | -5.9518 | 5.00E-05 | 0.00032 | -8.2568 | 5.00E-05 | 0.00038 |
| <b>Tmem233</b>       | -6.1731 | 5.00E-05 | 0.00032 | -6.7562 | 5.00E-05 | 0.00038 |
| <b>Plcd4</b>         | -6.3237 | 0.00105  | 0.00462 | -6.4321 | 3.00E-04 | 0.00184 |
| <b>Gdap1</b>         | -6.3866 | 5.00E-05 | 0.00032 | -4.9146 | 5.00E-05 | 0.00038 |
| <b>Pld5</b>          | -6.5885 | 0.00125  | 0.00536 | -5.8152 | 0.00855  | 0.02999 |
| <b>Ky</b>            | -6.8266 | 5.00E-05 | 0.00032 | -8.2712 | 5.00E-05 | 0.00038 |
| <b>Lrrc38</b>        | -7.201  | 5.00E-05 | 0.00032 | -5.966  | 5.00E-05 | 0.00038 |

---

**Supplemental table 2: Functional annotation clustering of the common genes** from Supplemental table 1 using DAVID (Database for Annotation, Visualization and Integrated Discovery) from <https://david.ncifcrf.gov>.

a. Upregulated genes (log2 fold change greater than 1 with p and q-values <0.05) were used for DAVID analysis b. Downregulated genes (log2 fold less than -1 with p and q-values <0.05) were used for DAVID analysis. Clusters with an enrichment score  $\geq 5.0$  and significant p-value <0.05 were used in the study.

a. Functional clusters of upregulated genes.

| <b>Annotation Cluster 1</b> |                                                              | <b>Enrichment Score: 14.04</b> |                |                  |
|-----------------------------|--------------------------------------------------------------|--------------------------------|----------------|------------------|
| <b>Category</b>             | <b>Term</b>                                                  | <b>Count</b>                   | <b>p-Value</b> | <b>Benjamini</b> |
| UP_KEYWORDS                 | Transcription regulation                                     | 210                            | 1.0E-27        | 6.1E-26          |
| UP_KEYWORDS                 | Transcription                                                | 214                            | 1.9E-27        | 9.5E-26          |
| GOTERM_BP_DIRECT            | Transcription, DNA-templated                                 | 217                            | 6.1E-22        | 2.3E-18          |
| GOTERM_BP_DIRECT            | Regulation of transcription, DNA-templated                   | 227                            | 4.3E-15        | 8.1E-12          |
| GOTERM_MF_DIRECT            | Transcription factor activity, sequence-specific DNA binding | 95                             | 1.1E-7         | 2.3E-5           |
| UP_KEYWORDS                 | DNA-binding                                                  | 133                            | 5.3E-7         | 8.6E-6           |
| GOTERM_MF_DIRECT            | DNA binding                                                  | 164                            | 9.1E-7         | 1.2E-4           |
| GOTERM_MF_DIRECT            | Sequence-specific DNA binding                                | 63                             | 1.9E-4         | 1.0E-2           |
| <b>Annotation Cluster 2</b> |                                                              | <b>Enrichment Score: 12.08</b> |                |                  |
| <b>Category</b>             | <b>Term</b>                                                  | <b>Count</b>                   | <b>p-Value</b> | <b>Benjamini</b> |
| UP_KEYWORDS                 | Zinc-finger                                                  | 169                            | 9.8E-19        | 3.9E-17          |
| UP_KEYWORDS                 | Zinc                                                         | 204                            | 1.8E-17        | 5.8E-16          |
| UP_KEYWORDS                 | Metal-binding                                                | 269                            | 1.3E-11        | 3.0E-10          |
| GOTERM_MF_DIRECT            | Zinc ion binding                                             | 115                            | 5.1E-9         | 1.4E-6           |
| GOTERM_MF_DIRECT            | Metal ion binding                                            | 272                            | 3.3E-7         | 6.0E-5           |
| <b>Annotation Cluster 3</b> |                                                              | <b>Enrichment Score: 7.63</b>  |                |                  |
| <b>Category</b>             | <b>Term</b>                                                  | <b>Count</b>                   | <b>p-Value</b> | <b>Benjamini</b> |
| UP_KEYWORDS                 | Autophagy                                                    | 26                             | 7.4E-9         | 1.4E-7           |
| GOTERM_BP_DIRECT            | Autophagy                                                    | 29                             | 2.2E-8         | 1.1E-5           |
| GOTERM_CC_DIRECT            | Autophagosome                                                | 18                             | 7.9E-8         | 6.4E-6           |
| <b>Annotation Cluster 4</b> |                                                              | <b>Enrichment Score: 6.71</b>  |                |                  |
| <b>Category</b>             | <b>Term</b>                                                  | <b>Count</b>                   | <b>p-Value</b> | <b>Benjamini</b> |
| UP_KEYWORDS                 | RNA-binding                                                  | 73                             | 1.5E-10        | 3.2E-9           |
| GOTERM_MF_DIRECT            | RNA binding                                                  | 92                             | 2.2E-9         | 7.8E-7           |
| INTERPRO                    | RNA recognition motif domain                                 | 35                             | 7.3E-7         | 1.3E-3           |
| INTERPRO                    | Nucleotide-binding, alpha-beta plait                         | 38                             | 1.3E-6         | 7.8E-4           |
| UP_SEQ_FEATURE              | Domain: RRM                                                  | 23                             | 2.6E-6         | 2.3E-3           |
| SMART                       | RRM                                                          | 32                             | 6.9E-5         | 2.4E-2           |
| <b>Annotation Cluster 5</b> |                                                              | <b>Enrichment Score: 5.9</b>   |                |                  |
| <b>Category</b>             | <b>Term</b>                                                  | <b>Count</b>                   | <b>p-Value</b> | <b>Benjamini</b> |
| UP_KEYWORDS                 | Proteasome                                                   | 28                             | 6.1E-20        | 2.7E-18          |
| GOTERM_CC_DIRECT            | Proteasome complex                                           | 30                             | 4.3E-19        | 6.9E-17          |
| KEGG_PATHWAY                | Proteasome                                                   | 23                             | 4.0E-15        | 1.1E-12          |
| GOTERM_CC_DIRECT            | Proteasome accessory complex                                 | 12                             | 2.0E-10        | 1.8E-8           |



|                  |                                                                                                 |    |        |        |
|------------------|-------------------------------------------------------------------------------------------------|----|--------|--------|
| GOTERM_CC_DIRECT | Proteasome core complex                                                                         | 10 | 6.4E-7 | 3.7E-5 |
| INTERPRO         | Proteasome, subunit alpha/beta                                                                  | 10 | 8.7E-7 | 7.6E-4 |
| UP_KEYWORDS      | Threonine protease                                                                              | 10 | 9.6E-7 | 1.4E-5 |
| GOTERM_MF_DIRECT | Threonine-type endopeptidase activity                                                           | 10 | 4.5E-6 | 4.1E-4 |
| GOTERM_BP_DIRECT | Antigen processing and presentation of exogenous peptide antigen via MHC class I, TAP-dependent | 10 | 4.6E-5 | 7.6E-3 |
| INTERPRO         | Proteasome A-type subunit                                                                       | 6  | 5.8E-5 | 1.5E-2 |
| INTERPRO         | Proteasome, alpha-subunit, N-terminal domain                                                    | 6  | 5.8E-5 | 1.5E-2 |
| GOTERM_CC_DIRECT | Proteasome core complex, alpha-subunit complex                                                  | 6  | 6.5E-5 | 2.1E-3 |
| SMART            | SM00948                                                                                         | 6  | 1.1E-4 | 1.3E-2 |
| GOTERM_BP_DIRECT | Proteolysis involved in cellular protein catabolic process                                      | 13 | 1.2E-4 | 1.5E-2 |
| GOTERM_MF_DIRECT | Endopeptidase activity                                                                          | 18 | 4.8E-4 | 2.2E-2 |
| INTERPRO         | Proteasome, beta-type subunit, conserved site                                                   | 5  | 4.7E-3 | 3.7E-1 |
| INTERPRO         | Proteasome B-type subunit                                                                       | 4  | 2.7E-2 | 6.5E-1 |
| UP_KEYWORDS      | Protease                                                                                        | 29 | 6.1E-1 | 9.0E-1 |
| GOTERM_MF_DIRECT | Peptidase activity                                                                              | 31 | 6.5E-1 | 1.0E0  |
| GOTERM_BP_DIRECT | Proteolysis                                                                                     | 34 | 6.7E-1 | 1.0E0  |

b. Functional clusters of downregulated genes.

| <b>Annotation Cluster 1</b> |                                          | <b>Enrichment Score: 21.45</b> |                |                  |
|-----------------------------|------------------------------------------|--------------------------------|----------------|------------------|
| <b>Category</b>             | <b>Term</b>                              | <b>Count</b>                   | <b>p-Value</b> | <b>Benjamini</b> |
| GOTERM_CC_DIRECT            | Proteinaceous extracellular matrix       | 69                             | 8.0E-27        | 4.1E-24          |
| UP_KEYWORDS                 | Extracellular matrix                     | 54                             | 1.3E-23        | 2.4E-21          |
| GOTERM_CC_DIRECT            | Extracellular matrix                     | 52                             | 4.1E-16        | 1.1E-13          |
| <b>Annotation Cluster 2</b> |                                          | <b>Enrichment Score: 16.07</b> |                |                  |
| <b>Category</b>             | <b>Term</b>                              | <b>Count</b>                   | <b>p-Value</b> | <b>Benjamini</b> |
| UP_KEYWORDS                 | Glycoprotein                             | 307                            | 6.5E-30        | 2.3E-27          |
| UP_SEQ_FEATURE              | Signal peptide                           | 266                            | 7.5E-21        | 1.8E-17          |
| UP_SEQ_FEATURE              | Glycosylation site: N-linked (GlcNAc...) | 287                            | 3.6E-19        | 4.2E-16          |
| UP_KEYWORDS                 | Signal                                   | 304                            | 1.9E-16        | 2.6E-14          |
| UP_KEYWORDS                 | Secreted                                 | 148                            | 1.9E-16        | 2.0E-14          |
| UP_KEYWORDS                 | Disulfide bond                           | 226                            | 2.2E-15        | 1.5E-13          |
| GOTERM_CC_DIRECT            | Extracellular region                     | 154                            | 1.5E-14        | 2.6E-12          |
| GOTERM_CC_DIRECT            | Extracellular space                      | 126                            | 1.5E-10        | 1.5E-8           |
| UP_SEQ_FEATURE              | Disulfide bond                           | 182                            | 7.9E-8         | 6.2E-5           |
| <b>Annotation Cluster 3</b> |                                          | <b>Enrichment Score: 6.56</b>  |                |                  |
| <b>Category</b>             | <b>Term</b>                              | <b>Count</b>                   | <b>p-Value</b> | <b>Benjamini</b> |
| UP_KEYWORDS                 | Collagen                                 | 20                             | 3.1E-9         | 1.5E-7           |
| GOTERM_CC_DIRECT            | Collagen trimer                          | 20                             | 6.7E-9         | 4.9E-7           |
| INTERPRO                    | Collagen triple helix repeat             | 18                             | 3.9E-8         | 6.0E-5           |
| KEGG_PATHWAY                | Protein digestion and absorption         | 19                             | 7.0E-8         | 1.8E-5           |

| UP_KEYWORDS                 | Hydroxylation                             | 16                           | 5.3E-6         | 1.9E-4           |
|-----------------------------|-------------------------------------------|------------------------------|----------------|------------------|
| UP_SEQ_FEATURE              | Region of interest: Triple-helical region | 6                            | 1.5E-3         | 2.0E-1           |
| <b>Annotation Cluster 4</b> |                                           | <b>Enrichment Score: 5.7</b> |                |                  |
| <b>Category</b>             | <b>Term</b>                               | <b>Count</b>                 | <b>p-Value</b> | <b>Benjamini</b> |
| KEGG_PATHWAY                | ECM-receptor interaction                  | 19                           | 7.0E-8         | 1.8E-5           |
| KEGG_PATHWAY                | Focal adhesion                            | 28                           | 7.8E-7         | 1.0E-4           |
| KEGG_PATHWAY                | PI3K-Akt signaling pathway                | 33                           | 1.5E-4         | 9.5E-3           |

**Supplementary table 3: De-identified patient samples for immunohistochemical analysis of ZIP14.**  
Presence of cancer and cachexia were based on autopsy report and additionally confirmed by histological analysis by two, independent pathologists at the University of Nebraska Medical Center and Columbia University Medical Center.

| Patient ID | Cachexia |       | Cancer |       | Cancer type                           | ZIP14 staining |       |
|------------|----------|-------|--------|-------|---------------------------------------|----------------|-------|
|            | No=0     | Yes=1 | No=0   | Yes=1 |                                       | No=0           | Yes=1 |
| 13R2882M   | 0        |       | 1      |       | Pancreatic                            | 0              |       |
| 33R6647M   | 0        |       | 1      |       | Pancreatic                            | 1              |       |
| 40R7635M   | 0        |       | 1      |       | Pancreatic                            | 0              |       |
| 42R7994M   | 0        |       | 1      |       | Pancreatic                            | 0              |       |
| 49R8858M   | 0        |       | 1      |       | Pancreatic                            | 0              |       |
| 52R9363M   | 0        |       | 1      |       | Pancreatic                            | 0              |       |
| 55R9939M   | 0        |       | 1      |       | Pancreatic                            | 1              |       |
| 57R10316M  | 0        |       | 1      |       | Pancreatic                            | 1              |       |
| 76RT1927M  | 0        |       | 1      |       | Pancreatic                            | 0              |       |
| 80RT2023M  | 0        |       | 1      |       | Pancreatic                            | 0              |       |
| MP15-166   | 0        |       | 1      |       | Hepatocellular carcinoma              | 0              |       |
| MP15-218   | 0        |       | 1      |       | Lung adenocarcinoma                   | 0              |       |
| MP15-222   | 0        |       | 1      |       | Breast carcinoma                      | 0              |       |
| MP15-108   | 0        |       | 1      |       | Endometrioid uterine carcinoma        | 1              |       |
| MP15-63    | 0        |       | 1      |       | Endometrial adenocarcinoma            | 0              |       |
| MP15-90    | 0        |       | 1      |       | Lung squamous cell carcinoma          | 0              |       |
| MP16-114   | 0        |       | 1      |       | Adenocarcinoma of colon               | 1              |       |
| MP16-148   | 0        |       | 1      |       | Cholangiocarcinoma                    | 0              |       |
| MP16-156   | 0        |       | 1      |       | Breast cancer                         | 0              |       |
| MP16-178   | 0        |       | 1      |       | Renal cell carcinoma                  | 0              |       |
| MP16-195   | 0        |       | 1      |       | Squamous cell carcinoma lung          | 0              |       |
| MP16-203   | 0        |       | 1      |       | Renal cell carcinoma and colon cancer | 0              |       |
| MP16-223   | 0        |       | 1      |       | Breast cancer                         | 0              |       |
| MP15-251   | 0        |       | 1      |       | Ovarian                               | 0              |       |
| 24R5148    | 0        |       | 1      |       | Pancreatic                            | 0              |       |
| 25R5462    | 0        |       | 1      |       | Pancreatic                            | 0              |       |
| 27R5690    | 0        |       | 1      |       | Pancreatic                            | 0              |       |
| 29R6017    | 0        |       | 1      |       | Pancreatic                            | 0              |       |
| 30R6158    | 0        |       | 1      |       | Pancreatic                            | 0              |       |
| 31R6267    | 0        |       | 1      |       | Pancreatic                            | 0              |       |
| 34R6828    | 0        |       | 1      |       | Pancreatic                            | 0              |       |
| 36R7244    | 0        |       | 1      |       | Pancreatic                            | 0              |       |

|           |   |   |            |   |
|-----------|---|---|------------|---|
| 39R7509   | 0 | 1 | Pancreatic | 0 |
| 43R8120   | 0 | 1 | Pancreatic | 1 |
| 45R8426   | 0 | 1 | Pancreatic | 0 |
| 48R8750   | 0 | 1 | Pancreatic | 0 |
| 51R9236   | 0 | 1 | Pancreatic | 0 |
| 54R9761   | 0 | 1 | Pancreatic | 0 |
| 59R10731  | 0 | 1 | Pancreatic | 1 |
| 60R10892  | 0 | 1 | Pancreatic | 0 |
| 61R11036  | 0 | 1 | Pancreatic | 0 |
| 63R13712  | 0 | 1 | Pancreatic | 0 |
| 64R11470  | 0 | 1 | Pancreatic | 0 |
| 70R12243  | 0 | 1 | Pancreatic | 0 |
| 74R12854  | 0 | 1 | Pancreatic | 0 |
| 81R13880  | 0 | 1 | Pancreatic | 0 |
| 88R14781  | 0 | 1 | Pancreatic | 1 |
| 89R14907  | 0 | 1 | Pancreatic | 0 |
| 90R15069  | 0 | 1 | Pancreatic | 0 |
| 94R15429  | 0 | 1 | Pancreatic | 0 |
| 95R15609  | 0 | 1 | Pancreatic | 0 |
| 97R15789  | 0 | 1 | Pancreatic | 0 |
| 98R15987  | 0 | 1 | Pancreatic | 0 |
| 4R506     | 1 | 1 | Pancreatic | 1 |
| 6R1030    | 1 | 1 | Pancreatic | 0 |
| 7R1137    | 1 | 1 | Pancreatic | 0 |
| 10R1911M  | 1 | 1 | Pancreatic | 0 |
| 12R2486M  | 1 | 1 | Pancreatic | 0 |
| 14R302M   | 1 | 1 | Pancreatic | 0 |
| 17R3568M  | 1 | 1 | Pancreatic | 0 |
| 23R4991M  | 1 | 1 | Pancreatic | 0 |
| 26R5572M  | 1 | 1 | Pancreatic | 1 |
| 28R5820M  | 1 | 1 | Pancreatic | 1 |
| 32R6485M  | 1 | 1 | Pancreatic | 1 |
| 38R7419M  | 1 | 1 | Pancreatic | 1 |
| 41R7922M  | 1 | 1 | Pancreatic | 1 |
| 44R8210M  | 1 | 1 | Pancreatic | 0 |
| 53R9709M  | 1 | 1 | Pancreatic | 1 |
| 56R10118M | 1 | 1 | Pancreatic | 0 |
| 62R11144M | 1 | 1 | Pancreatic | 0 |
| 66R11738M | 1 | 1 | Pancreatic | 0 |

|            |   |   |                                      |   |
|------------|---|---|--------------------------------------|---|
| 71R12512M  | 1 | 1 | Pancreatic                           | 0 |
| 72R12566M  | 1 | 1 | Pancreatic                           | 0 |
| 73R12693M  | 1 | 1 | Pancreatic                           | 1 |
| 75R13034M  | 1 | 1 | Pancreatic                           | 1 |
| 77R13304M  | 1 | 1 | Pancreatic                           | 1 |
| 78R13430M  | 1 | 1 | Pancreatic                           | 1 |
| 79R13538M  | 1 | 1 | Pancreatic                           | 1 |
| 83R14207M  | 1 | 1 | Pancreatic                           | 0 |
| 85R14385M  | 1 | 1 | Pancreatic                           | 1 |
| 86R14476M  | 1 | 1 | Pancreatic                           | 1 |
| 91R15141M  | 1 | 1 | Pancreatic                           | 1 |
| 93R15375   | 1 | 1 | Pancreatic                           | 0 |
| 96R15717M  | 1 | 1 | Pancreatic                           | 0 |
| 99R16059M  | 1 | 1 | Pancreatic                           | 0 |
| 100R16185M | 1 | 1 | Pancreatic                           | 0 |
| 101R16293  | 1 | 1 | Pancreatic                           | 1 |
| 14-212 A30 | 1 | 1 | Desmoplastic small round cell tumors | 1 |
| MP15-174   | 1 | 1 | Colon adenocarcinoma                 | 1 |
| MP15-220   | 1 | 1 | Small cell lung cancer               | 0 |
| MP15-230   | 1 | 1 | Cholangiocarcinoma                   | 0 |
| MP15-253   | 1 | 1 | Lymphoma and lung carcinoma          | 0 |
| MP16-38    | 1 | 1 | Pancreatic ductal Adenocarcinoma     | 1 |
| MP16-105   | 1 | 1 | Colon cancer                         | 0 |
| MP16-115   | 1 | 1 | Multiple myeloma and Breast Cancer   | 0 |
| MP16-136   | 1 | 1 | Adenocarcinoma of stomach            | 0 |

---

**Supplementary table 4: Analysis of upstream regulators by Ingenuity Pathway analysis (IPA) software using the cachexia signature derived from muscles from C26m2 and 4T1 models.** Differentially expressed genes common to the 4T1 and C26m2 models (Supplementary Table 1 and Fig 2a) with p and q-value less than 0.05 were used for querying upstream regulators using IPA. TNF-pathway genes were significant ( $p= 3.70E-15$ ) and are listed below (see Supplementary Fig. 3j).

| <b>Genes</b>    | <b>Prediction<br/>(based on measurement<br/>direction)</b> | <b>Expr log ratio</b> | <b>Findings</b>   |
|-----------------|------------------------------------------------------------|-----------------------|-------------------|
| <b>Abcb1b</b>   | Activated                                                  | 1.64                  | Upregulates (5)   |
| <b>ABCD2</b>    | Activated                                                  | -3.082                | Downregulates (1) |
| <b>ADAMTS5</b>  | Inhibited                                                  | -1.766                | Upregulates (2)   |
| <b>ADAMTS8</b>  | Activated                                                  | 1.529                 | Upregulates (2)   |
| <b>ADORA1</b>   | Inhibited                                                  | -2.382                | Upregulates (3)   |
| <b>AGFG2</b>    | Inhibited                                                  | 1.72                  | Downregulates (1) |
| <b>AGT</b>      | Inhibited                                                  | 1.66                  | Downregulates (4) |
| <b>AMPD3</b>    | Activated                                                  | 5.186                 | Upregulates (6)   |
| <b>ANGPT1</b>   | Affected                                                   | -1.845                | Regulates (2)     |
| <b>ANK3</b>     | Inhibited                                                  | 1.6                   | Downregulates (1) |
| <b>ARHGDI8</b>  | Inhibited                                                  | -1.846                | Upregulates (2)   |
| <b>ARRDC3</b>   | Activated                                                  | 2.394                 | Upregulates (1)   |
| <b>ATF3</b>     | Activated                                                  | 2.906                 | Upregulates (3)   |
| <b>ATF4</b>     | Activated                                                  | 1.703                 | Upregulates (1)   |
| <b>BCL2L1</b>   | Activated                                                  | 2.666                 | Upregulates (58)  |
| <b>BCL6</b>     | Inhibited                                                  | -2.419                | Upregulates (1)   |
| <b>BDNF</b>     | Activated                                                  | 2.866                 | Upregulates (1)   |
| <b>BGN</b>      | Affected                                                   | -1.571                | Regulates (2)     |
| <b>BTG2</b>     | Activated                                                  | 3.363                 | Upregulates (1)   |
| <b>C10orf10</b> | Activated                                                  | 5.148                 | Upregulates (1)   |
| <b>CCDC80</b>   | Activated                                                  | -2.485                | Downregulates (1) |
| <b>CCND1</b>    | Inhibited                                                  | -2.391                | Upregulates (42)  |
| <b>CD36</b>     | Affected                                                   | 1.916                 | Regulates (2)     |
| <b>CD55</b>     | Inhibited                                                  | -1.693                | Upregulates (2)   |
| <b>CD59</b>     | Inhibited                                                  | -2.253                | Upregulates (2)   |
| <b>CDH13</b>    | Inhibited                                                  | -1.918                | Upregulates (5)   |
| <b>CDKN1A</b>   | Activated                                                  | 5.008                 | Upregulates (14)  |
| <b>CEBPB</b>    | Activated                                                  | 2.061                 | Upregulates (13)  |
| <b>CEBPD</b>    | Activated                                                  | 4.157                 | Upregulates (15)  |
| <b>CHRNE</b>    | Inhibited                                                  | -2.275                | Upregulates (1)   |
| <b>CLEC11A</b>  | Activated                                                  | -3.392                | Downregulates (1) |
| <b>COL1A1</b>   | Affected                                                   | -4.975                | Regulates (4)     |
| <b>COL1A2</b>   | Activated                                                  | -4.197                | Downregulates (4) |
| <b>COL27A1</b>  | Inhibited                                                  | -1.629                | Upregulates (1)   |
| <b>COL3A1</b>   | Inhibited                                                  | -3.101                | Upregulates (3)   |
| <b>CPA3</b>     | Activated                                                  | -1.985                | Downregulates (1) |
| <b>CSF2RB</b>   | Activated                                                  | 3.123                 | Upregulates (4)   |
| <b>CXCL13</b>   | Activated                                                  | 2.988                 | Upregulates (3)   |
| <b>CXCL16</b>   | Inhibited                                                  | -1.837                | Upregulates (6)   |
| <b>CYP1B1</b>   | Activated                                                  | 3.29                  | Upregulates (4)   |

|                |           |        |                    |
|----------------|-----------|--------|--------------------|
| <b>CYP26B1</b> | Inhibited | -2.048 | Upregulates (2)    |
| <b>CYP2E1</b>  | Activated | -1.59  | Downregulates (3)  |
| <b>DAXX</b>    | Affected  | 1.865  | Regulates (1)      |
| <b>DCN</b>     | Inhibited | -1.594 | Upregulates (10)   |
| <b>DUSP10</b>  | Inhibited | -2.872 | Upregulates (3)    |
| <b>DUSP4</b>   | Inhibited | 1.62   | Downregulates (1)  |
| <b>EDNRB</b>   | Inhibited | 2.384  | Downregulates (1)  |
| <b>EGLN3</b>   | Activated | 3.296  | Upregulates (2)    |
| <b>FAM198B</b> | Activated | -1.891 | Downregulates (1)  |
| <b>FAS</b>     | Activated | 1.617  | Upregulates (70)   |
| <b>FBXO32</b>  | Activated | 3.974  | Upregulates (2)    |
| <b>FN1</b>     | Inhibited | -3.228 | Upregulates (5)    |
| <b>FOSL2</b>   | Activated | 1.977  | Upregulates (1)    |
| <b>FRZB</b>    | Affected  | -3.374 | Regulates (1)      |
| <b>G0S2</b>    | Activated | -2.243 | Downregulates (9)  |
| <b>GADD45A</b> | Activated | 1.806  | Upregulates (5)    |
| <b>GBP6</b>    | Inhibited | -1.851 | Upregulates (2)    |
| <b>GCLM</b>    | Activated | 2.474  | Upregulates (7)    |
| <b>GFRA2</b>   | Inhibited | -3.298 | Upregulates (2)    |
| <b>GPAM</b>    | Inhibited | -2.157 | Upregulates (1)    |
| <b>GPD1</b>    | Activated | -2.953 | Downregulates (2)  |
| <b>Gsta4</b>   | Inhibited | -2.355 | Upregulates (2)    |
| <b>Gstt1</b>   | Inhibited | -1.629 | Upregulates (4)    |
| <b>HDAC9</b>   | Inhibited | -2.271 | Upregulates (1)    |
| <b>HPGD</b>    | Activated | -1.587 | Downregulates (4)  |
| <b>IDH2</b>    | Activated | 1.589  | Upregulates (1)    |
| <b>IFI16</b>   | Inhibited | -1.878 | Upregulates (5)    |
| <b>IFIT3</b>   | Inhibited | -4.363 | Upregulates (1)    |
| <b>IGF1</b>    | Activated | -1.718 | Downregulates (17) |
| <b>IGFBP3</b>  | Activated | 2.744  | Upregulates (2)    |
| <b>IGFBP5</b>  | Activated | -3.999 | Downregulates (1)  |
| <b>IGFBP6</b>  | Inhibited | -2.077 | Upregulates (5)    |
| <b>IL12A</b>   | Affected  | -2.097 | Regulates (2)      |
| <b>IL15</b>    | Inhibited | -2.157 | Upregulates (13)   |
| <b>IL1R2</b>   | Affected  | 1.954  | Regulates (1)      |
| <b>IL4R</b>    | Activated | 2.434  | Upregulates (3)    |
| <b>INSIG1</b>  | Affected  | 1.621  | Regulates (1)      |
| <b>IRS2</b>    | Inhibited | 3.273  | Downregulates (1)  |
| <b>ITGA4</b>   | Inhibited | -5.139 | Upregulates (10)   |
| <b>ITGB6</b>   | Inhibited | -3.744 | Upregulates (5)    |
| <b>JUNB</b>    | Activated | 3.046  | Upregulates (15)   |
| <b>JUP</b>     | Inhibited | 1.886  | Downregulates (1)  |
| <b>KCNH2</b>   | Inhibited | -4.59  | Upregulates (4)    |
| <b>Kcnn2</b>   | Inhibited | -3.573 | Upregulates (2)    |
| <b>KLF10</b>   | Activated | 2.182  | Upregulates (3)    |
| <b>KLF2</b>    | Inhibited | 1.723  | Downregulates (1)  |
| <b>LCN2</b>    | Activated | 4.332  | Upregulates (39)   |
| <b>LDHA</b>    | Inhibited | -1.812 | Upregulates (1)    |
| <b>LITAF</b>   | Activated | 2.247  | Upregulates (2)    |
| <b>LPL</b>     | Inhibited | 1.715  | Downregulates (3)  |

|                 |           |        |                   |
|-----------------|-----------|--------|-------------------|
| <b>LRG1</b>     | Activated | 1.836  | Upregulates (1)   |
| <b>MAFA</b>     | Activated | -3.572 | Downregulates (3) |
| <b>MAFF</b>     | Activated | 4.588  | Upregulates (3)   |
| <b>MAP2K6</b>   | Inhibited | -3.835 | Upregulates (2)   |
| <b>MAP3K14</b>  | Activated | 2.73   | Upregulates (1)   |
| <b>MAP3K8</b>   | Activated | 2.11   | Upregulates (1)   |
| <b>MECP2</b>    | Activated | 1.688  | Upregulates (1)   |
| <b>MEF2C</b>    | Activated | -2.697 | Downregulates (1) |
| <b>MEOX1</b>    | Inhibited | -2.207 | Upregulates (1)   |
| <b>MFHAS1</b>   | Activated | 1.579  | Upregulates (1)   |
| <b>MGST1</b>    | Inhibited | 1.664  | Downregulates (1) |
| <b>MMP9</b>     | Activated | 2.383  | Upregulates (166) |
| <b>MNT</b>      | Affected  | 2.254  | Regulates (1)     |
| <b>Mt1</b>      | Affected  | 5.823  | Regulates (4)     |
| <b>Mt2</b>      | Activated | 6.609  | Upregulates (5)   |
| <b>MYOD1</b>    | Activated | -2.472 | Downregulates (6) |
| <b>NAGLU</b>    | Activated | 1.744  | Upregulates (4)   |
| <b>NET1</b>     | Affected  | 1.612  | Regulates (1)     |
| <b>NFATC2</b>   | Inhibited | -2.418 | Upregulates (1)   |
| <b>NFKBIA</b>   | Activated | 1.72   | Upregulates (69)  |
| <b>NFKBIB</b>   | Activated | 2.042  | Upregulates (7)   |
| <b>NGFR</b>     | Activated | 1.687  | Upregulates (1)   |
| <b>NOCT</b>     | Activated | 2.502  | Upregulates (5)   |
| <b>NOTCH4</b>   | Activated | 1.54   | Upregulates (1)   |
| <b>NOV</b>      | Inhibited | -2.018 | Upregulates (2)   |
| <b>NR1H4</b>    | Inhibited | 2.879  | Downregulates (7) |
| <b>NR4A3</b>    | Affected  | 1.747  | Regulates (2)     |
| <b>OGN</b>      | Affected  | -2.8   | Regulates (5)     |
| <b>OLFML2A</b>  | Activated | -2.502 | Downregulates (1) |
| <b>OLFML2B</b>  | Activated | -2.007 | Downregulates (1) |
| <b>OPTN</b>     | Activated | 1.588  | Upregulates (6)   |
| <b>OSMR</b>     | Activated | 1.986  | Upregulates (3)   |
| <b>P2RY6</b>    | Inhibited | -1.81  | Upregulates (7)   |
| <b>PCSK6</b>    | Activated | -1.927 | Downregulates (1) |
| <b>PDPN</b>     | Inhibited | -2.122 | Upregulates (1)   |
| <b>PIM3</b>     | Affected  | 2.534  | Regulates (1)     |
| <b>PLA2G5</b>   | Inhibited | -2.338 | Upregulates (7)   |
| <b>PLAA</b>     | Activated | 1.965  | Upregulates (1)   |
| <b>PLAUR</b>    | Activated | 2.69   | Upregulates (3)   |
| <b>PLIN4</b>    | Affected  | 2.991  | Regulates (2)     |
| <b>POSTN</b>    | Inhibited | -2.531 | Upregulates (1)   |
| <b>PPARGC1A</b> | Inhibited | 1.823  | Downregulates (7) |
| <b>PPARGC1B</b> | Activated | -2.953 | Downregulates (1) |
| <b>PPP1R15A</b> | Activated | 3.541  | Upregulates (4)   |
| <b>PRSS23</b>   | Activated | -2.185 | Downregulates (1) |
| <b>PSMA2</b>    | Inhibited | 1.734  | Downregulates (2) |
| <b>PTX3</b>     | Inhibited | -3.26  | Upregulates (36)  |
| <b>RANBP9</b>   | Activated | 3.197  | Upregulates (1)   |
| <b>RASD1</b>    | Inhibited | 2.771  | Downregulates (2) |
| <b>RCN3</b>     | Inhibited | -3.005 | Upregulates (2)   |



|                 |           |        |                   |
|-----------------|-----------|--------|-------------------|
| <b>RGCC</b>     | Inhibited | 2.734  | Downregulates (1) |
| <b>RRM1</b>     | Affected  | -1.892 | Regulates (1)     |
| <b>S100A8</b>   | Activated | 3.638  | Upregulates (7)   |
| <b>S100A9</b>   | Activated | 2.709  | Upregulates (2)   |
| <b>Saa3</b>     | Activated | ∞      | Upregulates (32)  |
| <b>SAT1</b>     | Activated | 1.502  | Upregulates (2)   |
| <b>SDC4</b>     | Activated | 2.113  | Upregulates (22)  |
| <b>SELENOP</b>  | Inhibited | 1.84   | Downregulates (2) |
| <b>SERPINA3</b> | Activated | 4.697  | Upregulates (6)   |
| <b>SERPINB9</b> | Inhibited | -1.653 | Upregulates (3)   |
| <b>SERPINE1</b> | Activated | 4.91   | Upregulates (54)  |
| <b>SERPINE2</b> | Inhibited | -2.239 | Upregulates (10)  |
| <b>SERPINF1</b> | Affected  | -3.338 | Regulates (1)     |
| <b>SLC20A1</b>  | Activated | 2.427  | Upregulates (2)   |
| <b>SLC43A2</b>  | Activated | 2.346  | Upregulates (1)   |
| <b>SLC7A8</b>   | Activated | 3.045  | Upregulates (3)   |
| <b>SMAD1</b>    | Activated | 1.527  | Upregulates (1)   |
| <b>SMAD7</b>    | Activated | 1.933  | Upregulates (1)   |
| <b>SOD1</b>     | Inhibited | 1.773  | Downregulates (3) |
| <b>SOD3</b>     | Affected  | -1.75  | Regulates (4)     |
| <b>SORBS1</b>   | Inhibited | 1.885  | Downregulates (1) |
| <b>SOX4</b>     | Activated | 2.073  | Upregulates (1)   |
| <b>SPHK1</b>    | Inhibited | 4.279  | Downregulates (5) |
| <b>SPSB1</b>    | Affected  | 4.076  | Regulates (1)     |
| <b>SQSTM1</b>   | Activated | 2.124  | Upregulates (4)   |
| <b>SYTL1</b>    | Activated | 3.408  | Upregulates (5)   |
| <b>TFRC</b>     | Activated | -3.84  | Downregulates (4) |
| <b>TGFB2</b>    | Inhibited | -2.722 | Upregulates (1)   |
| <b>TGIF1</b>    | Activated | 3.377  | Upregulates (1)   |
| <b>THY1</b>     | Inhibited | -3.637 | Upregulates (1)   |
| <b>TICAM1</b>   | Activated | 2.237  | Upregulates (9)   |
| <b>TIMP2</b>    | Affected  | -1.802 | Regulates (3)     |
| <b>TMC7</b>     | Activated | -2.25  | Downregulates (1) |
| <b>TNC</b>      | Inhibited | -3.911 | Upregulates (2)   |
| <b>TNFAIP2</b>  | Inhibited | -2.593 | Upregulates (23)  |
| <b>TP53INP1</b> | Activated | 2.753  | Upregulates (3)   |
| <b>TRAFD1</b>   | Inhibited | 2.252  | Downregulates (1) |
| <b>TRIM63</b>   | Activated | 4.729  | Upregulates (4)   |
| <b>UTP11</b>    | Affected  | 1.505  | Regulates (1)     |
| <b>VEGFD</b>    | Affected  | 3.286  | Regulates (1)     |
| <b>WLS</b>      | Activated | -1.99  | Downregulates (1) |
| <b>WNT5A</b>    | Inhibited | -3.415 | Upregulates (6)   |
| <b>ZFP36</b>    | Activated | 2.39   | Upregulates (2)   |

---

**Supplementary table 5: Analysis of upstream regulators by Ingenuity Pathway analysis (IPA) software using the cachexia signature derived from muscles from C26m2 and 4T1 models.** Differentially expressed genes common to the 4T1 and C26m2 models (Supplementary Table 1 and Fig 2a) with p and q-value less than 0.05 were used for querying upstream regulators using IPA. TGF- $\beta$ 1 pathway genes were significant ( $p=6.27E-15$ ) and are listed below (see Supplementary Fig. 3j).

| <b>Genes</b>    | <b>Prediction<br/>(based on measurement<br/>direction)</b> | <b>Expr log ratio</b> | <b>Findings</b>   |
|-----------------|------------------------------------------------------------|-----------------------|-------------------|
| <b>Saa3</b>     | Inhibited                                                  | $\infty$              | Downregulates (1) |
| <b>Acot1</b>    | Inhibited                                                  | 5.934                 | Downregulates (1) |
| <b>IL6R</b>     | Activated                                                  | 5.29                  | Upregulates (2)   |
| <b>SLC39A14</b> | Affected                                                   | 5.263                 | Regulates (2)     |
| <b>CDKN1A</b>   | Activated                                                  | 5.008                 | Upregulates (122) |
| <b>PNMT</b>     | Affected                                                   | 4.968                 | Regulates (2)     |
| <b>SERPINE1</b> | Activated                                                  | 4.91                  | Upregulates (236) |
| <b>DDIT4</b>    | Affected                                                   | 4.844                 | Regulates (2)     |
| <b>SERPINA3</b> | Activated                                                  | 4.697                 | Upregulates (3)   |
| <b>INHBB</b>    | Activated                                                  | 4.48                  | Upregulates (2)   |
| <b>ACSS1</b>    | Inhibited                                                  | 4.343                 | Downregulates (1) |
| <b>LCN2</b>     | Activated                                                  | 4.332                 | Upregulates (2)   |
| <b>SPHK1</b>    | Activated                                                  | 4.279                 | Upregulates (5)   |
| <b>ADAMTS2</b>  | Activated                                                  | 4.174                 | Upregulates (1)   |
| <b>SPIDR</b>    | Affected                                                   | 3.797                 | Regulates (2)     |
| <b>RUNX1</b>    | Activated                                                  | 3.544                 | Upregulates (13)  |
| <b>TGIF1</b>    | Affected                                                   | 3.377                 | Regulates (5)     |
| <b>IFI30</b>    | Activated                                                  | 3.323                 | Upregulates (1)   |
| <b>JUNB</b>     | Activated                                                  | 3.046                 | Upregulates (22)  |
| <b>FOXO1</b>    | Affected                                                   | 3.033                 | Regulates (1)     |
| <b>ZWINT</b>    | Affected                                                   | 2.903                 | Regulates (1)     |
| <b>KLF15</b>    | Inhibited                                                  | 2.88                  | Downregulates (2) |
| <b>BDNF</b>     | Activated                                                  | 2.866                 | Upregulates (4)   |
| <b>GPRC5A</b>   | Affected                                                   | 2.82                  | Regulates (2)     |
| <b>AKT1</b>     | Activated                                                  | 2.768                 | Upregulates (1)   |
| <b>IGFBP3</b>   | Activated                                                  | 2.744                 | Upregulates (9)   |
| <b>RGCC</b>     | Activated                                                  | 2.734                 | Upregulates (3)   |
| <b>PLAUR</b>    | Activated                                                  | 2.69                  | Upregulates (7)   |
| <b>BCL2L1</b>   | Inhibited                                                  | 2.666                 | Downregulates (9) |
| <b>IFRD1</b>    | Affected                                                   | 2.435                 | Regulates (2)     |
| <b>IL4R</b>     | Activated                                                  | 2.434                 | Upregulates (5)   |
| <b>SLC20A1</b>  | Activated                                                  | 2.427                 | Upregulates (1)   |
| <b>ZFP36</b>    | Activated                                                  | 2.39                  | Upregulates (6)   |
| <b>EDNRB</b>    | Inhibited                                                  | 2.384                 | Downregulates (1) |
| <b>MMP9</b>     | Activated                                                  | 2.383                 | Upregulates (31)  |
| <b>PROM1</b>    | Activated                                                  | 2.313                 | Upregulates (8)   |
| <b>LITAF</b>    | Affected                                                   | 2.247                 | Regulates (2)     |
| <b>DDX21</b>    | Affected                                                   | 2.241                 | Regulates (2)     |
| <b>HSPB1</b>    | Activated                                                  | 2.204                 | Upregulates (1)   |
| <b>KLF10</b>    | Activated                                                  | 2.182                 | Upregulates (6)   |
| <b>FOXO3</b>    | Activated                                                  | 2.179                 | Upregulates (1)   |
| <b>SBNO2</b>    | Inhibited                                                  | 2.173                 | Downregulates (3) |

|                    |           |        |                    |
|--------------------|-----------|--------|--------------------|
| UVRAG              | Activated | 2.114  | Upregulates (1)    |
| SDC4               | Affected  | 2.113  | Regulates (2)      |
| SOX4               | Activated | 2.073  | Upregulates (6)    |
| BNIP3L             | Inhibited | 2.063  | Downregulates (1)  |
| CEBPB              | Activated | 2.061  | Upregulates (4)    |
| AMOTL2             | Affected  | 2.02   | Regulates (2)      |
| CD68               | Affected  | 1.992  | Regulates (1)      |
| ULK1               | Activated | 1.985  | Upregulates (4)    |
| FOSL2              | Activated | 1.977  | Upregulates (1)    |
| MAPK6              | Activated | 1.938  | Upregulates (1)    |
| SMAD7              | Activated | 1.933  | Upregulates (52)   |
| CD36               | Inhibited | 1.916  | Downregulates (6)  |
| ING1               | Affected  | 1.886  | Regulates (2)      |
| JUP                | Inhibited | 1.886  | Downregulates (4)  |
| DAPK1              | Activated | 1.877  | Upregulates (7)    |
| DAXX               | Affected  | 1.865  | Regulates (1)      |
| SRFBP1             | Affected  | 1.858  | Regulates (1)      |
| FAM107A            | Affected  | 1.833  | Regulates (1)      |
| PPARGC1A           | Inhibited | 1.823  | Downregulates (2)  |
| GADD45A            | Activated | 1.806  | Upregulates (6)    |
| RBM3               | Activated | 1.796  | Upregulates (1)    |
| GRHL1              | Inhibited | 1.782  | Downregulates (1)  |
| RORC               | Activated | 1.777  | Upregulates (23)   |
| DNAJB6             | Activated | 1.764  | Upregulates (1)    |
| NR4A3              | Affected  | 1.747  | Regulates (2)      |
| RORA               | Activated | 1.729  | Upregulates (6)    |
| KLF2               | Inhibited | 1.723  | Downregulates (1)  |
| NFKBIA             | Activated | 1.72   | Upregulates (6)    |
| LPL                | Inhibited | 1.715  | Downregulates (2)  |
| ATF4               | Affected  | 1.703  | Regulates (2)      |
| SELENBP1           | Inhibited | 1.685  | Downregulates (1)  |
| LOC102724788/PRODH | Affected  | 1.68   | Regulates (1)      |
| SEMA7A             | Activated | 1.634  | Upregulates (3)    |
| PDE7A              | Activated | 1.633  | Upregulates (1)    |
| CTSD               | Activated | 1.627  | Upregulates (2)    |
| DUSP4              | Activated | 1.62   | Upregulates (8)    |
| FAS                | Inhibited | 1.617  | Downregulates (11) |
| NET1               | Activated | 1.612  | Upregulates (23)   |
| PSMC1              | Activated | 1.6    | Upregulates (1)    |
| STAT3              | Activated | 1.555  | Upregulates (2)    |
| PSMD1              | Activated | 1.554  | Upregulates (1)    |
| FUBP1              | Inhibited | 1.534  | Downregulates (1)  |
| GNA13              | Activated | 1.51   | Upregulates (2)    |
| AK1                | Inhibited | -1.504 | Upregulates (1)    |
| LPAR1              | Activated | -1.514 | Downregulates (15) |
| CRHR2              | Affected  | -1.516 | Regulates (2)      |
| FZD2               | Inhibited | -1.519 | Upregulates (3)    |
| CADM1              | Affected  | -1.52  | Regulates (1)      |
| DDR2               | Affected  | -1.525 | Regulates (1)      |
| HNMT               | Affected  | -1.564 | Regulates (2)      |

|                                |           |        |                    |
|--------------------------------|-----------|--------|--------------------|
| <b>BGN</b>                     | Inhibited | -1.571 | Upregulates (19)   |
| <b>SMOC2</b>                   | Affected  | -1.577 | Regulates (1)      |
| <b>HPGD</b>                    | Inhibited | -1.587 | Upregulates (4)    |
| <b>AXL</b>                     | Inhibited | -1.592 | Upregulates (3)    |
| <b>DCN</b>                     | Activated | -1.594 | Downregulates (2)  |
| <b>FZD1</b>                    | Inhibited | -1.632 | Upregulates (1)    |
| <b>FBN1</b>                    | Inhibited | -1.636 | Upregulates (2)    |
| <b>FGF6</b>                    | Affected  | -1.664 | Regulates (1)      |
| <b>ARHGAP19</b>                | Affected  | -1.673 | Regulates (2)      |
| <b>HSPB2</b>                   | Inhibited | -1.676 | Upregulates (2)    |
| <b>TUBA1A</b>                  | Inhibited | -1.684 | Upregulates (3)    |
| <b>CD55</b>                    | Activated | -1.693 | Downregulates (5)  |
| <b>IGF1</b>                    | Activated | -1.718 | Downregulates (9)  |
| <b>COL8A1</b>                  | Inhibited | -1.726 | Upregulates (3)    |
| <b>SOD3</b>                    | Inhibited | -1.75  | Upregulates (1)    |
| <b>S100A4</b>                  | Inhibited | -1.769 | Upregulates (14)   |
| <b>TIMP2</b>                   | Affected  | -1.802 | Regulates (1)      |
| <b>P2RY6</b>                   | Inhibited | -1.81  | Upregulates (1)    |
| <b>LDHA</b>                    | Inhibited | -1.812 | Upregulates (1)    |
| <b>USH1C</b>                   | Activated | -1.832 | Downregulates (1)  |
| <b>ANGPT1</b>                  | Activated | -1.845 | Downregulates (1)  |
| <b>IFI16</b>                   | Activated | -1.878 | Downregulates (1)  |
| <b>PSPH</b>                    | Activated | -1.949 | Downregulates (1)  |
| <b>CPQ</b>                     | Affected  | -1.986 | Regulates (1)      |
| <b>HLA-DRB5</b>                | Activated | -1.99  | Downregulates (1)  |
| <b>ACTC1</b>                   | Inhibited | -2.002 | Upregulates (3)    |
| <b>NOV</b>                     | Activated | -2.018 | Downregulates (15) |
| <b>IGFBP6</b>                  | Activated | -2.077 | Downregulates (1)  |
| <b>IL12A</b>                   | Inhibited | -2.097 | Upregulates (2)    |
| <b>PDPN</b>                    | Affected  | -2.122 | Regulates (4)      |
| <b>IL15</b>                    | Activated | -2.157 | Downregulates (7)  |
| <b>HLA-DQA1</b>                | Activated | -2.192 | Downregulates (2)  |
| <b>FILIP1L</b>                 | Inhibited | -2.193 | Upregulates (1)    |
| <b>SERPINE2</b>                | Inhibited | -2.239 | Upregulates (2)    |
| <b>CD59</b>                    | Inhibited | -2.253 | Upregulates (2)    |
| <b>MCM2</b>                    | Activated | -2.27  | Downregulates (2)  |
| <b>CELSR2</b>                  | Activated | -2.286 | Downregulates (2)  |
| <b>GNG7</b>                    | Activated | -2.294 | Downregulates (1)  |
| <b>HLA-DMA</b>                 | Affected  | -2.306 | Regulates (1)      |
| <b>P2RY1</b>                   | Activated | -2.331 | Downregulates (1)  |
| <b>Gsta4</b>                   | Affected  | -2.355 | Regulates (1)      |
| <b>ADORA1</b>                  | Inhibited | -2.382 | Upregulates (1)    |
| <b>CCND1</b>                   | Inhibited | -2.391 | Upregulates (9)    |
| <b>XYLT1</b>                   | Inhibited | -2.407 | Upregulates (6)    |
| <b>SERPINA1</b>                | Activated | -2.41  | Downregulates (4)  |
| <b>NFATC2</b>                  | Inhibited | -2.418 | Upregulates (2)    |
| <b>BCL6</b>                    | Inhibited | -2.419 | Upregulates (3)    |
| <b>Calm1 (includes others)</b> | Inhibited | -2.453 | Upregulates (1)    |
| <b>UST</b>                     | Affected  | -2.459 | Regulates (2)      |

|                 |           |        |                   |
|-----------------|-----------|--------|-------------------|
| <b>MYOD1</b>    | Activated | -2.472 | Downregulates (1) |
| <b>HLA-DQB1</b> | Activated | -2.473 | Downregulates (1) |
| <b>POSTN</b>    | Inhibited | -2.531 | Upregulates (2)   |
| <b>MRC1</b>     | Inhibited | -2.596 | Upregulates (1)   |
| <b>MEF2C</b>    | Inhibited | -2.697 | Upregulates (1)   |
| <b>TGFB2</b>    | Activated | -2.722 | Downregulates (5) |
| <b>APLNR</b>    | Affected  | -2.735 | Regulates (1)     |
| <b>RASGRP3</b>  | Inhibited | -2.744 | Upregulates (2)   |
| <b>ALDH18A1</b> | Inhibited | -2.755 | Upregulates (1)   |
| <b>F13A1</b>    | Inhibited | -2.883 | Upregulates (2)   |
| <b>ITGBL1</b>   | Inhibited | -3.041 | Upregulates (1)   |
| <b>COL6A1</b>   | Inhibited | -3.041 | Upregulates (6)   |
| <b>COL5A1</b>   | Inhibited | -3.048 | Upregulates (4)   |
| <b>COL3A1</b>   | Inhibited | -3.101 | Upregulates (14)  |
| <b>FN1</b>      | Inhibited | -3.228 | Upregulates (101) |
| <b>PTX3</b>     | Affected  | -3.26  | Regulates (1)     |
| <b>COL6A2</b>   | Inhibited | -3.325 | Upregulates (1)   |
| <b>ARNT2</b>    | Affected  | -3.326 | Regulates (2)     |
| <b>PCOLCE2</b>  | Inhibited | -3.333 | Upregulates (2)   |
| <b>WNT5A</b>    | Inhibited | -3.415 | Upregulates (5)   |
| <b>ITGA11</b>   | Inhibited | -3.474 | Upregulates (1)   |
| <b>IGHM</b>     | Activated | -3.515 | Downregulates (1) |
| <b>MAF</b>      | Inhibited | -3.551 | Upregulates (7)   |
| <b>COL6A3</b>   | Inhibited | -3.588 | Upregulates (4)   |
| <b>THY1</b>     | Inhibited | -3.637 | Upregulates (1)   |
| <b>AMD1</b>     | Affected  | -3.719 | Regulates (2)     |
| <b>ITGB6</b>    | Inhibited | -3.744 | Upregulates (1)   |
| <b>TFRC</b>     | Affected  | -3.84  | Regulates (2)     |
| <b>TNC</b>      | Inhibited | -3.911 | Upregulates (17)  |
| <b>IGFBP5</b>   | Activated | -3.999 | Downregulates (2) |
| <b>COL1A2</b>   | Inhibited | -4.197 | Upregulates (74)  |
| <b>DKK3</b>     | Inhibited | -4.299 | Upregulates (3)   |
| <b>IFIT3</b>    | Affected  | -4.363 | Regulates (2)     |
| <b>COL1A1</b>   | Inhibited | -4.975 | Upregulates (74)  |
| <b>CDH4</b>     | Inhibited | -5.025 | Upregulates (1)   |
| <b>ITGA4</b>    | Activated | -5.139 | Downregulates (3) |
| <b>COMP</b>     | Inhibited | -5.503 | Upregulates (1)   |

---

**Supplementary table 6: Primers used for genotyping analysis.**

| <b>Primer name</b>             | <b>Sequence</b>                      |
|--------------------------------|--------------------------------------|
| <i>Zip14</i> wild type forward | 5'-TGCTGCTGCTATTTGGGTCT-3'           |
| <i>Zip14</i> knockout forward  | 5'-CTCGTGCTTTACGGTATCGC-3'           |
| <i>Zip14</i> reverse           | 5'-GAATGCTGCATTGAAAAGGTC-3'          |
| <i>K-ras fl-1</i>              | 5'-CTAGCCACCATGGCTTGAGT-3'           |
| <i>K-ras fl-2</i>              | 5'-ATGTCTTTCCCCAGCACAGT-3'           |
| <i>K-ras</i> common            | 5'-TCCGAATTCAGTGA CTACAGATG-3'       |
| <i>Lkb1 fl-1</i>               | 5'-TCTAACAATGCGCTCATCGTCATCCTCGGC-3' |
| <i>Lkb1 fl-2</i>               | 5'-GGGCTTCCACCTGGTGCCAGCCTGT-3'      |
| <i>Lkb1</i> common             | 5'-GAGATGGGTACCAGGAGTTGGGGCT-3'      |
| <i>p53 fl-1</i>                | 5'-CACAAAACAGGTTAAACCCAG-3'          |
| <i>p53 fl-2</i>                | 5'-AGCACATAGGAGGCAGAGAC-3'           |
| <i>Rb</i> forward              | 5'-CTCTAGATCTCTCATTCTTCCC-3'         |
| <i>Rb</i> reverse              | 5'-CCTTGACCATAGCCCAGCAC-3'           |
| <i>Pten</i> forward            | 5'-CAAGCACTCTGCGAACTGAG-3'           |
| <i>Pten</i> reverse            | 5'-AAGTTTTTGAAGGCAAGATGC-3'          |

**Supplementary table 7: Primers used for qRT-PCR analysis.**

| <b>Name of genes</b>       | <b>Forward primer (5'-3')</b> | <b>Reverse primer (5'-3')</b> |
|----------------------------|-------------------------------|-------------------------------|
| Mouse- <i>Zip14</i>        | GTGTCTCACTGATTAACCTGGC        | AGAGCAGCGTTCCAATGGAC          |
| Mouse- <i>Zip14</i> KO*    | CTACTCTGATATCGGGACCTT         | TGAGCAGGATGACGAAGTCTC         |
| Human- <i>ZIP14</i>        | TTCAACTTCCTTTCTGCCTG          | GACAGACCTCATTTCATCTCAG        |
| Mouse- <i>Trim63/MuRF1</i> | GTGTGAGGTGCCTACTTGCTC         | GCTCAGTCTTCTGTCCTTGGA         |
| Mouse- <i>MAFbx/Fbxo32</i> | CAGCTTCGTGAGCGACCTC           | GGCAGTCGAGAAGTCCAGTC          |
| Mouse- <i>Fbxo31</i>       | CATGCGTTCAAGCCACTG            | GTCTGGTTACACTTGGTGGAG         |
| Mouse- <i>Musa1/Fbxo30</i> | TCGTGGAATGGTAATCTTGC          | CCTCCCGTTTCTCTATCACG          |
| Mouse- <i>Fbxo21</i>       | CCTGTACCTGGCGATGTACC          | AGCACCTTCAAGACAAGACAGA        |
| Mouse- <i>Traf6</i>        | AAAGCGAGAGATTCTTTCCCTG        | ACTGGGGACAATTCAGTAGAGC        |
| Mouse- <i>Trim62</i>       | ACGATGCCTTCGAGGAGTT           | CTGTCCTGAAGGGCCTGA            |
| Mouse- <i>Nedd4-1</i>      | TCGGAGGACGAGGTATGGG           | GGTACGGATCAGCAGTGAACA         |
| Mouse- <i>Fbxo40</i>       | ACCTCCTGGAAAGTCCACAAT         | CCCAGCTGTTGATTTTTGAGA         |
| Mouse- <i>Psm1</i>         | CATTGGAATCGTTGGTAAAGAC        | GTTTCATCGGCTTTTTCTGC          |
| Mouse- <i>Psmc4</i>        | AGGACGAGCAGAAGAACCTG          | AATAGTTAGAGCCTGTGGTGGAG       |
| Mouse- <i>Psm11</i>        | GAGTTCAGAGAGCCCAGTC           | AACCCAGTTCAAGGATGCTC          |
| Mouse- <i>Usp14</i>        | CACGAGTTGCTTCGTATTCC          | TTCAGGGTTCCTCCTTTCAC          |
| Mouse- <i>Ubc</i>          | CGTCGAGCCCAGTGTACCACC         | ACCTCCCCCATCACACCCAAGA        |
| Mouse- <i>Lc3</i>          | GAGAAGACCTTCAAGCAGCG          | CTTGTATCGCTCTATAATCAC         |
| Mouse- <i>Gabarapl1</i>    | CATCGTGGAGAAGGCTCCTA          | ATACAGCTGGCCCATGGTAG          |
| Mouse- <i>Bnip3</i>        | GCATGAGAAACACAAGCGTTATG       | GTGCTAGTGAAGTTGTCAGAC         |
| Mouse- <i>MyoD</i>         | GAGCAAAGTGAATGAGGCCTT         | CACTGTAGTAGGCGGTGTCGT         |
| Mouse- <i>Mef2c</i>        | GTCTCACCTGGTAACCTGAACAAG      | GCAGATGGCGGCATGTTATGTAGG      |
| Mouse- <i>Myf5</i>         | CCTGTCTGGTCCCGAAAGAAC         | GACGTGATCCGATCCACAATG         |
| Mouse- <i>Gapdh</i>        | AGGTCGGTGTGAACGGATTTG         | TGTAGACCATGTAGTTGAGGTCA       |
| Human- <i>GAPDH</i>        | AATCCCATCACCATCTTCCA          | TGGAATCCACGACGTAATCA          |
| Mouse- <i>CyclinD1</i>     | GCGTACCCTGACACCAATCTC         | CTCCTCTTCGCACTTCTGCTC         |
| Mouse- <i>Pai1</i>         | ACGCCTGGTGTGGTGAATGC          | ACGGTGCTGCCATCAGACTTGTG       |
| Human- <i>PAI1</i>         | GGACTTTTCAGAGGTGGAGAGAGC      | TGATTTGTGGAAGAGGCGGC          |
| Mouse- <i>Cxcl1</i>        | CTGGGATTCACCTCAAGAATC         | CAGGGTCAAGGCAAGCCTC           |
| Mouse- <i>18s rRNA</i>     | TGCGCCGCTAGAGGTGAAATT         | TGGCAAATGCTTTCGCTCT           |

\*This pair of primers were used for checking mRNA expression level of *Zip14* in *Zip14* KO mice intramuscularly injected with AAV-*Zip14*.

## SUPPLEMENTARY FIGURE LEGENDS.

### Supplementary Figure 1. Metastatic C26m2 cell line derivation and cachexia development in metastatic mouse models.

(a) Schematic representation of the *in vivo* selection process for C26m2 cell line derivation. Luciferase-labeled murine colon cancer C26 parental (C26p) cells were injected into CD2F1 mice via intracardiac injection into the arterial circulation to generate liver metastases. Cancer cells were isolated from the liver and purified by antibiotic selection. Cells were passaged in syngeneic mice for another round of selection, and the resulting C26m2 metastatic cell line was subsequently used for cachexia studies (see Fig.1).

(b) Histological analysis of distant metastases from mice injected with either 4T1 or C26m2 cancer cells in arterial circulation and collected after 13 days (4T1) and 11 days (C26m2). Lung (4T1) and liver (C26m2) metastasis compared to normal lung and liver are shown. Scale bars, 100  $\mu$ m. Data is representative of three independent experiments.

(c-i) Characterization of cachexia parameters using modified tumor-resection-and-relapse approach for spontaneous metastasis assay. Schematic model (c). Luciferase-labeled C26m2 or 4T1 cancer cells were implanted subcutaneously and after 2-3 weeks of tumor growth, tumors were surgically resected. Mice were subsequently monitored for the development of cachexia and metastasis by bioluminescence imaging at 5 weeks post tumor-cell injection (d).

(e) Representative H&E staining images of cross-sections of tibialis anterior (TA) muscles from mice 5 weeks post 4T1 or C26m2 tumor-cell injection, compared to their respective non-tumor-bearing controls (see Fig 1c). Scale bars, 50  $\mu$ m. Data is representative of 3 independent experiments (d and e).

(f,g) qRT-PCR analysis of *Trim63*, *MAFbx*, *Fbxo31* and *Musa1* expression in the gastrocnemius, quadriceps, soleus, EDL and cardiac muscles from mice bearing tumors (Tb) derived from either 4T1 (f) or C26m2 (g) metastases. Muscles were collected for analysis 5 weeks after tumor-cell injection (see Fig. 1) and were compared with the age-matched, non-tumor-bearing controls



(Con). For 4T1 model, n=4 controls and n=5 tumor bearing mice for gastrocnemius muscles; n=5 controls and n=6 tumor bearing mice for quadriceps muscles; n=4 controls and n=5 tumor bearing mice for soleus muscles; n=3 mice per group for EDL muscles; n=3 controls and n=5 tumor bearing mice for cardiac muscles. For C26m2 model, n=4 mice per group for gastrocnemius and soleus muscles; n=3 mice per group for quadriceps, EDL and cardiac muscles.

(h,i) Average daily food intake (h) and water intake (i) of mice bearing 4T1 or C26m2 metastases compared to their respective controls. n=6 control mice and n=17 Tb mice for the C26m2 model; n=5 control mice and n=19 Tb mice for the 4T1 model.

Error bars represent SEM and all data were represented by mean  $\pm$  SEM. *P* values were determined by two-tailed, unpaired Student's *t* test for (f,g). n.s., not significant. Con, non-tumor-bearing control; Tb, tumor-bearing.

**Supplementary Figure 2. *Zip14* and genes associated with the ubiquitin, UPS and autophagy pathways are upregulated in multiple cachectic muscles from metastatic mouse models.**

(a,b) Principal component analysis (PCA) plots (a) and overlap in differentially expressed genes (b) from RNA-Seq based transcriptomic analysis shown in Fig. 2a of TA muscles from mice bearing 4T1 (a, left) or C26m2 (a, right) metastases (Tb) compared to their respective controls (Con). n=2 controls and n=2 mice bearing 4T1 metastases; n=2 controls and n=2 mice bearing C26m2 metastases.

(c) Gene set enrichment analysis (GSEA) of the KEGG biological pathway associated with the proteasome-pathway genes using signatures from cachectic muscles from Fig. 2a and Supplementary Table 1. Pre-ranked GSEA was performed on stand-alone GSEA (v2.2.2) using the C2\_CP\_KEGG gene set for the differentially expressed genes obtained from C26m2 (and common to 4T1), ranked by their log<sub>2</sub> fold change (FC) values with significant *p* and *q* values.

n=2 controls and n=2 mice bearing 4T1 metastases; n=2 controls and n=2 mice bearing C26m2 metastases. Data is representative of two independent experiments.

(d,e) qRT-PCR analysis of mRNA expression of genes associated with ubiquitination (*Fbxo21*, *Traf6*, *Trim62*, *Nedd4*, *Fbxo40*, *Ubc* and *Usp14*), ubiquitin proteasome system (*Psmc1*, *Psmc4* and *Psmc11*) and autophagy (*Lc3*, *Gabarapl1* and *Bnip3*) pathways in tibialis anterior (d) and diaphragm (e) muscles from mice bearing either 4T1 or C26m2 metastases (Tb) collected 5 weeks after tumor-cell injection (see Fig. 1), compared with age-matched, non-tumor-bearing controls (Con). For tibialis anterior muscles (d), n=6 controls and n=7 tumor bearing mice for analyzing *Fbxo21*, *Traf6*, *Trim62*, *Nedd4* and *Fbxo40*, and n=4 mice per group for analyzing the other indicated genes for 4T1 model; n=5 mice per group for analyzing *Fbxo21*, *Traf6*, *Trim62*, *Nedd4* and *Fbxo40*, and n=4 mice per group for analyzing the other indicated genes for C26m2 model. For diaphragm muscles (e), n=4 controls and n=6 tumor bearing mice for analyzing *Traf6*, *Trim62*, *Nedd4* and *Fbxo40*, and n=6 mice per group for analyzing the other indicated genes for 4T1 model; n=8 per group for analyzing *Traf6*, *Trim62*, *Nedd4* and *Fbxo40*, and n=6 mice per group for analyzing the other indicated genes for C26m2 model.

(f) Immunoblot analysis of ZIP14 expression in TA muscles from mice bearing C26m2 metastases (Tb) compared to their respective non-tumor-bearing controls (Con) collected at 5 weeks post tumor-cell injection (Fig. 1a). Tubulin was used as a loading control. Data is representative of three independent experiments.

(g) Relative mRNA expression levels of the *Slc30* family of zinc efflux transporters from RNA-Seq analysis (see Fig. 2) in heatmap representation for TA muscles from mice bearing 4T1 (top) or C26m2 (bottom) metastases at five weeks post tumor-cell injection compared to their respective controls.

(h) qRT-PCR analysis of *Slc39a14* (Zrt- and Irt-like protein 14, also known as *Zip14*) expression in gastrocnemius, quadriceps, soleus, EDL and cardiac muscles from mice bearing 4T1 (top) or C26m2 (bottom) metastases at five weeks post tumor-cell injection compared to their respective

controls. For 4T1 model, n=4 mice per group for gastrocnemius muscles; n=5 controls and n=6 tumor bearing mice for quadriceps muscles; n=4 controls and n=5 tumor bearing mice for soleus muscles; n=3 mice per group for EDL muscles; n=3 controls and n=5 tumor bearing mice for cardiac muscles. For C26m2 model, n=4 mice per group for gastrocnemius and soleus muscles; n=3 mice per group for quadriceps, EDL and cardiac muscles.

Error bars represent SEM and all data were represented by mean  $\pm$  SEM. *P* values for (d,e,h) were determined by two-tailed, unpaired Student's *t* test. n.s., not significant. Con, non-tumor-bearing control; Tb, tumor-bearing.

**Supplementary Figure 3. ZIP14 is upregulated in cachectic muscles from metastatic mouse models and patients across cancer types, and is induced by TNF- $\alpha$  and TGF- $\beta$  cytokines.**

(a) Schematic representation of tumor induction and metastatic progression in four metastatic models of lung cancer. Autochthonous models *Kras/p53* conditional mutant (*Kras*<sup>LSL-G12D/+</sup>-*p53*<sup>fl/fl</sup>), *Kras/Lkb1* conditional mutant (*Kras*<sup>LSL-G12D/+</sup>-*Lkb1*<sup>fl/fl</sup>) and *Pten/Lkb1* conditional mutant (*Pten*<sup>fl/fl</sup>-*Lkb1*<sup>fl/fl</sup>), xenograft model PC9-BrM3, and *Rb/p53* mutant (SCLC) allograft model were generated and characterized for cachexia development.

(b) Representative images of H&E staining of lung sections (upper panel) and bodyweight analysis (lower panel) for *Pten/Lkb1* conditional mutant (*Pten*<sup>fl/fl</sup>-*Lkb1*<sup>fl/fl</sup>) model upon Adeno-Cre induction collected at endpoint. Scale bars, 200  $\mu$ m. n=3 controls and n=6 tumor bearing mice. Data is representative of 3 independent experiments.

(c) qRT-PCR analysis of *Trim63*, *MAFbx*, *Fbxo31*, *Musa1* and *Zip14* in TA muscles from *Pten/Lkb1* mutant model. Muscles were collected at 27 weeks post Adeno-virus induction endpoint. n=3 mice per group for *Zip14* expression; n=3 controls and n=4 tumor bearing mice for remaining genes.

(d,e) Representative images of H&E staining of liver sections (d) and body weight and limb

muscle weights (e) from *Rb/p53* mutant allograft model collected 6 weeks after tumor resection (Tb) and compared to age-matched, non-tumor-bearing control mice (Con). Scale bars, 100  $\mu$ m in (d). n=6 mice per group in (e). Con, non-tumor-bearing control; Tb, tumor-bearing; TA, tibialis anterior; Gast, gastrocnemius muscle. Data is representative of 3 independent experiments (d). (f) Amino-acid sequence of human (Hs) and mouse (Ms) ZIP14 fragment used for generating antibodies against ZIP14.

(g) Images of Coomassie blue staining of purified recombinant human and mouse ZIP14 protein fragment resolved on a 15% SDS-PAGE (left) and immunoblot analysis of uninduced (Un) and induced (In) crude bacterial lysates using immune sera against human and mouse ZIP14 fragments (right). Data is representative of 3 independent experiments.

(h) Representative images of immunohistochemical staining of human liver (left two images) and mouse liver (right two images) using an antibody developed against human and mouse ZIP14, respectively. Rabbit isotype antibody was used as a negative control for staining human liver sections, and *Zip14* KO mice were used as a negative control for staining mouse liver sections. Scale bars, 25  $\mu$ m. Data is representative of three independent experiments.

(i) Representative images of immunohistochemical staining using additional antibodies against ZIP14 (commercial antibodies HPA16508 (S) and Anti-NET34 (M) generated using ZIP14 peptide sequences). Scale bars, 50  $\mu$ m. Data is representative of 3 independent experiments.

(j) Upstream regulators of *Zip14* in cachectic muscles analyzed by Ingenuity Pathway Analysis (IPA). Differentially expressed genes common to the 4T1 and C26m2 models with  $p$  and  $q$  value  $<0.05$  from Fig. 2 and Supplementary Table 1 were used for querying upstream regulators. Pathways with significant  $p$  value  $<0.05$  are listed with their  $p$  value of overlap. n=2 controls and n=2 mice bearing 4T1 metastases; n=2 controls and n=2 mice bearing C26m2 metastases.

(k) qRT-PCR analysis of *Zip14* in C2C12 myoblasts treated with either vehicle, TNF- $\alpha$  (50 ng/ml), TGF- $\beta$  (10 ng/ml), or both TNF- $\alpha$  (50 ng/ml) + TGF- $\beta$  (10 ng/ml), either alone or in the

presence of the indicated inhibitors. Cells were pretreated with either vehicle or 10  $\mu$ M of the indicated inhibitors for 1 hour prior to adding the cytokines (TGF- $\beta$  for 9 hours, and TNF- $\alpha$  for 3 hours before harvest). Experiments were designed so that cells from all groups were harvested at the same time. n=3 samples for C2C12 cells treated with (TNF- $\alpha$ + TGF- $\beta$ + NF- $\kappa$ Bi) or (TNF- $\alpha$ + TGF- $\beta$ + Smadi), and n=4 samples for all other groups. Inhibitors: NF- $\kappa$ Bi = NF- $\kappa$ B inhibitor (BAY 11-7085); AP1i = AP1 inhibitor (CC401); Smadi = TGF $\beta$  receptor I inhibitor (SB431542).

(l) qRT-PCR analysis of *Pai1* and *Cxcl1* genes in mouse C2C12 cells and human skeletal myoblasts treated with TGF- $\beta$  (10 ng/ml) alone or together with Smadi (TGF- $\beta$  receptor inhibitor, SB431542), or TNF- $\alpha$  (50 ng/ml) alone or together with NF- $\kappa$ Bi (NF- $\kappa$ B inhibitor, BAY 11-7085). These genes were used as positive controls for testing the bioactivity of the recombinant TGF- $\beta$  and TNF- $\alpha$  proteins, and the efficacy of the inhibitors in pathway inhibition used in panel (k) and Fig. 3d. n=4 samples per group.

(m) Immunoblot analysis to detect abundance of phosphorylated c-Jun in 3 day-differentiated C2C12 cells treated with either media control, 50 ng/ml of TNF- $\alpha$  alone or 50 ng/ml of TNF- $\alpha$  in the presence of 10 $\mu$ M AP1 inhibitor (CC401) for 30 mins. Total c-Jun and tubulin were analyzed as loading controls.

(n,o) Representative immunostaining images of TNF- $\alpha$  (n) and TGF- $\beta$  (o) in lungs from either non-tumor-bearing mice or mice bearing 4T1 or C26m2 metastases at five weeks post tumor-cell injection. Scale bars, 100  $\mu$ m.

(p,q) Immunoblot analysis of phosphorylated p65 and Smad2 in muscles after TNF- $\alpha$  or TGF- $\beta$  neutralizing antibody treatment. Following the tumor-resection-and-relapse approach (see Fig. 1a and Supplementary Fig. 1c), mice bearing either 4T1 (p) or C26m2 (q) metastases were treated with either an isotype control antibody, or a neutralizing antibody against TNF- $\alpha$ , TGF- $\beta$ , or both (200  $\mu$ g antibody per mouse treated three times a week) starting one week after surgery, for a period of one week (see Fig. 3e,f).

Data is representative of 3 independent experiments (m-q). Error bars represent SEM and all

data were represented by mean  $\pm$  SEM. *P* values for (c, e) were determined by two-tailed, unpaired Student's *t* test, and *P* values for (k,l) were determined by one-way ANOVA. *F* value (DFn, DFd) for k  $F(9, 28) = 68.4$ , l *Pai1*-mouse  $F(2, 9) = 154.2$ , l *Cxcl1*-mouse  $F(2, 9) = 345.6$ , l *PAI1*-human  $F(2, 9) = 31.2$ , l *CXCL1*-human  $F(2, 9) = 47.4$ . n.s., not significant. \**P*<0.05, \*\*\**P*<0.001 and \*\*\*\**P*<0.0001.

#### **Supplementary Figure 4. ZIP14 loss reduces metastatic-cancer-induced muscle atrophy.**

(a) Genotyping analysis for validation of germline *Zip14* KO mice. *Zip14* heterozygous (Hets, lanes 1 and 2), *Zip14*-WT (lanes 3 and 4) and *Zip14*-KO mice (lanes 5 and 6). Representative images of non-tumor-bearing and tumor-bearing *Zip14*-WT or *Zip14*-KO mice are shown below.

(b) Tumor weight of *Zip14*-WT and -KO mice with 4T1 tumor burden (Tb). n=12 for *Zip14*-WT mice, and n=7 for *Zip14*-KO mice with 4T1 tumor burden.

(c) Normalized hind limb grip strength of *Zip14*-WT and -KO mice with 4T1 tumor burden (Tb) or age- matched non-tumor-bearing controls. n=8 WT mice, n=6 Tb-WT mice, n=7 KO mice and n=5 Tb-KO mice.

(d) (Top panels) qRT-PCR analysis of expression of atrophy-associated markers *Trim63*, *MAFbx*, *Fbxo31* and *Musa1* in tibialis anterior and diaphragm muscles from C26m2 tumor-bearing *Zip14*-WT or *Zip14*-KO mice and non-tumor-bearing control mice. For TA muscles, n=7 WT mice, n=6 Tb-WT mice, n=4 KO mice and n=6 Tb-KO mice for analyzing *Trim63* and *MAFbx*; n=7 WT mice, n=8 Tb-WT mice, n=4 KO mice and n=5 Tb-KO mice for analyzing *Fbxo31*; n=7 WT mice, n=8 Tb-WT mice, n=4 KO mice and n=5 Tb-KO mice for analyzing *Musa1*. For diaphragm muscles, n=4 mice per group. (Middle and lower panels) qRT-PCR analysis of genes associated with ubiquitination (*Ubc* and *Usp14*), UPS (*Psmc1*, *Psmc4* and *Psmc11*) and autophagy (*Lc3*, *Gabarapl1* and *Bnip3*) pathways in tibialis anterior and diaphragm muscles from *Zip14*-WT and -KO mice with 4T1 (Tb, middle panels) or C26m2 (Tb, lower panels) metastases, compared with the age-matched, non- tumor-bearing controls. For TA muscles from 4T1 model, n=4 WT mice, n=5 Tb-WT mice, n=4 KO mice and n=8 Tb-KO

mice. For diaphragm muscles from 4T1 model, n=3 mice per group. For TA muscles from C26m2 model, n=7 WT mice, n=8 Tb-WT mice, n=4 KO mice and n=5 Tb-KO mice. For diaphragm muscles from C26m2 model, n=4 mice per group. Data were normalized to non-tumor-bearing *Zip14*-WT control mice.

(e) Quantitation of the percentage of succinate dehydrogenase (SDH) positive fibers in gastrocnemius muscles from 4T1-tumor-bearing *Zip14*-WT or *Zip14*-KO mice and age-matched control mice. n=3 mice per group.

(f) Representative immunofluorescence images of MyHC IIa (green) and MyHC IIb (red) expression in gastrocnemius muscles from *Zip14*-WT and *Zip14*-KO mice with or without 4T1-tumor-cell injection. Scale bars, 50  $\mu$ m. Data is representative of 3 independent experiments.

(g) (Top panel) Representative immunofluorescence images of CD31 expression in gastrocnemius muscles from 4T1-tumor-bearing *Zip14*-WT or *Zip14*-KO mice and age-matched non-tumor-bearing control mice. (Bottom panel) Quantitation of CD31-positive capillaries per fiber. n=3 mice per group. Scale bars, 50  $\mu$ m.

(h) Representative immunofluorescence images of laminin (top panels) and quantitation of the percentage of SDH-positive fibers (bottom panels) in EDL and tibialis anterior muscles from 4T1-tumor-bearing *Zip14*-WT or *Zip14*-KO mice and age-matched, non-tumor-bearing control mice. Scale bars, 50  $\mu$ m. For SDH quantitation, n=3 mice per group.

(i) Representative immunofluorescence images of ZIP14 in gastrocnemius muscles isolated from C26m2-tumor-bearing mice injected intramuscularly with either shCon or sh*Zip14* (see also Fig. 4d) from mice per group. Green, ZIP14; blue, DAPI. Scale bars, 50  $\mu$ m. Data representative of three independent experiments with muscle sections taken from different depths of each muscle from n=3 mice per group.

(j,k) Normalized hind limb grip strength measurement (j) and tumor volume (k) in mice injected with either shCon or sh*Zip14* in their gastrocnemius muscles followed by C26m2-tumor-cell injection (see also Fig. 4d). n=5 mice per group for grip strength analysis, and n=4 shCon and

n=5 sh*Zip14* injected mice for tumor volume analysis. Tb, tumor-bearing.

(l) Representative images of SDH immunostaining in gastrocnemius muscles from C26m2-tumor-bearing mice injected intramuscularly with either shCon or sh*Zip14* (left, see also Fig. 4d), and the quantitation of the percentage of SDH-positive fibers shown on the right. Scale bars, 100  $\mu$ m. n=4 mice per group.

(m) Representative immunofluorescence images of MyHC IIa (green) and MyHC IIb (red) in gastrocnemius muscles from mice injected intramuscularly with either shCon or sh*Zip14* from C26m2-tumor-bearing or age-matched control mice (see also Fig. 4d). Scale bars, 100  $\mu$ m. Data is representative of 3 independent experiments.

(n) Quantitation of the number of capillaries per muscle fiber in gastrocnemius muscles from C26m2-tumor-bearing mice injected intramuscularly with either shCon or sh*Zip14* (see also Fig. 4d). n=3 mice per group.

(o) qRT-PCR analysis of *Zip14* in gastrocnemius muscles from non-tumor-bearing mice injected with either shCon or sh*Zip14* in their gastrocnemius muscles (see also Fig. 4d). n=3 mice per group. Data were normalized to shCon.

(p) Representative immunofluorescence images of laminin in gastrocnemius muscles from non-tumor-bearing mice injected intramuscularly with either shCon or sh*Zip14* (see also Fig. 4d). Scale bars, 50  $\mu$ m. Data is representative of 3 independent experiments.

(q,r) Quantitation of the percentage of SDH-positive fibers (q) and the number of capillaries per fiber (r) in gastrocnemius muscles from non-tumor-bearing mice injected intramuscularly with either shCon or sh*Zip14* (see also Fig. 4d). n=3 mice per group.

(s) qRT-PCR analysis of *Trim63*, *MAFbx*, *Fbxo31* and *Musa1* in gastrocnemius muscles from non-tumor-bearing mice injected intramuscularly with either shCon or sh*Zip14* (see also Fig. 4d). n=3 mice per group. Data were normalized to shCon.

(t) Zinc metal-ion levels determined by ICP/MS analysis in quadriceps, soleus, EDL, cardiac muscles ( $\mu$ g/g of dry weight) and serum ( $\mu$ g/ml of serum) from mice with 4T1 tumor metastases



(upper panel) or C26m2 tumor metastases (lower panel) and respective age-matched, non-tumor-bearing controls. For 4T1 model, n=4 controls and n=5 tumor bearing mice for quadriceps and soleus muscles; n=7 controls and n=5 tumor bearing mice for EDL muscles; n=4 controls and n=6 tumor bearing mice for cardiac muscles and n=4 mice per group for serum. For C26m2 model, n=5 controls and n=7 tumor bearing mice for quadriceps muscles; n=5 controls and n=6 tumor bearing mice for soleus muscles; n=4 mice per group for EDL muscles; n=10 mice per group for cardiac muscles; n=6 controls and n=7 tumor bearing mice for serum.

(u) Intracellular Zn and P levels within single muscle fibers isolated from non-tumor-bearing mice or mice bearing C26m2 metastases by LA-ICP Mass spectrometry are shown. Single EDL muscle fibers were isolated, mounted on slides and air-dried. Slides were placed in sealed ablation cell and ablated along a single fiber for about 2mm with a speed of 5 $\mu$ m/sec. Individual muscle fiber data was subtracted from a blank line on the same slide with same dimension, size and parameters as the sample line. Data representative of three independent experiments with n=3 mice per group, 3-5 fibers per mouse.

(v) Zinc metal-ion levels ( $\mu$ g/g of dry weight) determined by ICP/MS analysis in gastrocnemius muscle of 4T1-tumor-bearing *Zip14*-WT or *Zip14*-KO mice compared to non-tumor bearing littermates. n=5 WT mice, n=4 Tb-WT mice, n=4 KO mice and n=8 Tb-KO mice.

(w) (Left) Representative immunofluorescence images of ZIP14 (red) in C2C12 muscle cells infected with adenovirus expressing either *GFP* (Adeno-Control) or *Zip14* (Adeno-*Zip14*). Blue, DAPI. Scale bars, 50  $\mu$ m. (Right) Adeno-Control (Con) and Adeno-*Zip14* (*Zip14*) infected C2C12 muscle cells were treated with 0.5  $\mu$ M ZnCl<sub>2</sub>, and the reduction of zinc in the medium over time was measured by the FluoZin-3 fluorescence-based assay. Undifferentiated C2C12 or 3-day differentiated C2C12 cells were used for this assay. n=3 samples per group and data is representative of three independent experiments.

(x) Food and water intake and behavioral coordination tests by rotarod (upper panel), liver and kidney function tests (AST, BUN, and creatinine, lower panel) in C26m2-tumor-bearing mice

with and without zinc supplemented water. See also Fig. 4i. n=4 mice per group for food intake and latency to fall analyses; n=4 Tb mice and n=3 Tb+Zn mice for water intake analysis; n=3 mice per group for liver and kidney function tests.

(y) Tumor volume of *Zip14*-WT or -KO mice injected with C26m2 cancer cells and treated with either regular water (-Zn) or zinc-supplemented water (+Zn) (see also Fig. 4i). n=18 for Tb-WT -Zn; n=12 for Tb-WT +Zn; n=5 for Tb-KO -Zn; n=4 for Tb-KO +Zn.

Error bars represent SEM, and all data were represented by mean  $\pm$  SEM. *P* values were determined by two-tailed, unpaired Student's t-test in (b, j, k, l, n, o, q-t, w and x) and by one-way ANOVA with post-hoc Tukey's test in (c-e, g, h, v and y) with F value (DFn, DFd) for c F(3, 22) = 13.6, d *Trim63*-Tibialis anterior(TA)-Colon cancer F(3, 19) = 6.5, d *MAFbx*-TA-Colon cancer F(3, 19) = 5.3, d *Fbxo31*-TA-Colon cancer F(3, 23) = 11.6, d *Musa1*-TA-Colon cancer F(3, 20) = 11.8, d *Trim63*-Diaphragm-Colon cancer F(3, 12) = 23.3, d *MAFbx*- Diaphragm-Colon cancer F(3, 12) = 20.1, d *Fbxo31*- Diaphragm-Colon cancer F(3, 12) = 66.4, d *Musa1*-Diaphragm-Colon cancer F(3, 12) = 13.9, d *Psmc4*-TA-Breast cancer F(3, 17) = 65.8, d *Psmc4*-TA-Breast cancer F(3, 17) = 86.8, d *Ubc*-TA-Breast cancer F(3, 17) = 11.6, d *Lc3*-TA-Breast cancer F(3, 17) = 29.4, d *Usp14*-TA-Breast cancer F(3, 17) = 23.7, d *GabarapL1*-TA-Breast cancer F(3, 17) = 32.1, d *Bnip3*-TA-Breast cancer F(3, 17) = 25.0, d *Psmc4*-Diaphragm-Breast cancer F(3, 8) = 3.3, d *Psmc4*-Diaphragm-Breast cancer F(3, 8) = 4.8, d *Psmc4*-Diaphragm-Breast cancer F(3, 8) = 10.8, d *Ubc*-Diaphragm-Breast cancer F(3, 8) = 29.3, d *Lc3*-Diaphragm-Breast cancer F(3, 8) = 25.5, d *Usp14*-Diaphragm-Breast cancer F(3, 8) = 9.2, d *GabarapL1*-Diaphragm-Breast cancer F(3, 8) = 13.9, d *Bnip3*-Diaphragm-Breast cancer F(3, 8) = 9.4, d *Psmc4*-TA-Colon cancer F(3, 20) = 5.2, d *Psmc4*-TA-Colon cancer F(3, 20) = 15.6, d *Psmc4*-TA-Colon cancer F(3, 20) = 7.6, d *Ubc*-TA-Colon cancer F(3, 20) = 5.1, d *Lc3*-TA-Colon cancer F(3, 20) = 10.1, d *Usp14*-TA-Colon cancer F(3, 20) = 8.7, d *GabarapL1*-TA -Colon cancer F(3, 20) = 14.7, d *Bnip3*-TA-Colon cancer F(3, 20) = 8.4, d *Psmc4*-Diaphragm-Colon cancer F(3, 12) = 0.61, d *Psmc4*-Diaphragm-Colon

cancer  $F(3, 12) = 19.1$ , d *Psmc11*-Diaphragm-Colon cancer  $F(3, 12) = 32.7$ , d *Ubc*-Diaphragm-Colon cancer  $F(3, 12) = 6.1$ , d *Lc3*-Diaphragm-Colon cancer  $F(3, 12) = 52.2$ , d *Usp14*-Diaphragm-Colon cancer  $F(3, 12) = 7.2$ , d *GabarapL1*-Diaphragm-Colon cancer  $F(3, 12) = 8.8$ , d *Bnip3*-Diaphragm-Colon cancer  $F(3, 12) = 52.7$ , e  $F(3, 8) = 0.14$ , g  $F(3, 8) = 1.24$ , h EDL (3, 8) = 0.57, h TA  $F(3, 8) = 0.29$ , v  $F(3, 17) = 5.5$ , y  $F(3, 35) = 0.13$ . n.s., not significant. \* $P < 0.05$ , \*\* $P < 0.01$ , \*\*\* $P < 0.001$  and \*\*\*\* $P < 0.0001$ . Con, non-tumor bearing control; Tb, tumor-bearing.

### **Supplementary Figure 5. ZIP14-mediated zinc uptake in muscle cells blocks myogenesis and induces myosin heavy chain loss.**

(a) Schematic representation of isolation and representative flow cytometry analysis of the indicated muscle progenitor populations in gastrocnemius muscles from mice bearing either 4T1 or C26m2 metastases (Tb) collected 5 weeks after tumor resection and compared with age-matched, non-tumor-bearing control mice (Con). Data is representative of three independent experiments.

(b) Representative immunofluorescence images of psoas muscle sections using antibodies against PAX7 (shown in green) and ZIP14 (shown in red) from non-cachectic (left) or cachectic (right) metastatic cancer patients. Blue, DAPI. White arrows indicate satellite cell expressing both PAX7 and ZIP14 in muscles from cachectic patients. Scale bars, 20  $\mu\text{m}$ . Data is representative of three independent experiments (n=5 muscles per group).

(c) Schematic model based on previous studies showing the process of muscle differentiation. In response to injury of normal muscles, quiescent satellite cells are activated, proliferate and become committed as myoblasts. Once committed, myoblasts exit the cell cycle and fuse to form multinucleated myofibers. These new myofibers contribute to mature muscle mass. This process is thought to be blocked in cancer, where muscles fail to regenerate despite satellite-cell activation and proliferation.

(d) Representative immunofluorescence images using antibody against desmin (red) to identify

primary myoblasts in culture. Blue, DAPI. Scale bars, 25  $\mu\text{m}$ . Data is representative of 3 independent experiments.

(e) Differentiation of control and *Zip14*-expressing primary myoblasts with and without zinc treatment. (Left panel) Primary myoblasts were infected with adenovirus expressing either *GFP* control (Adeno- Con) or *Zip14* (Adeno-*Zip14*), and relative *Zip14* expression levels were measured by qRT-PCR analysis two days after infection (n=4 samples per group). (Middle and right panels) Primary myoblasts were differentiated for 2 days followed by treatment with either 0 or 50  $\mu\text{M}$   $\text{ZnCl}_2$  for 24 h. Differentiation was then quantified by MyHC immunofluorescence staining (n=26 samples from Adeno-Con group and n=37 samples from Adeno-*Zip14* group). Scale bars, 12.5  $\mu\text{m}$ .

(f) Representative bright-field images of C2C12 cells infected with adenovirus expressing either *GFP* (Adeno-Con) or *Zip14* (Adeno-*Zip14*) and differentiated for 6 days either in the presence of 0 or 50  $\mu\text{M}$   $\text{ZnCl}_2$  replenished daily. Scale bars, 25  $\mu\text{m}$ . n=3 independently repeated experiments with similar results.

(g,h) C2C12 cells expressing either *GFP* (Adeno-Con) or *Zip14* (Adeno-*Zip14*) were differentiated for 3 days and treated with either 0 or 50  $\mu\text{M}$   $\text{ZnCl}_2$  for 24 h. Cell viability was then measured by MTS assay or by immunoblot analysis for cleaved caspase-3 with tubulin as a loading control (h). C2C12 cells treated with doxorubicin (Doxo) chemotherapy was used as a positive control in both assays. Doxo was used at a dose of 2.5  $\mu\text{M}$  in (g) and 0  $\mu\text{M}$ , 0.25  $\mu\text{M}$  (duplicate), and 2.5  $\mu\text{M}$  in (h). Undiff and Diff represent undifferentiated and differentiated C2C12 muscle cells, respectively. n=3 samples per group in (g).

(i) C2C12 cells expressing either *GFP* (Adeno-Con) or *Zip14* (Adeno-*Zip14*) were differentiated for two days and then treated with 0 or 50  $\mu\text{M}$   $\text{ZnCl}_2$  for 24 h. Relative *CyclinD1* expression was then determined by qRT-PCR analysis. n=4 samples per group. Data was normalized to untreated controls.

(j) GSEA using HALLMARK-MYOGENESIS gene set querying RNA-Seq gene signatures from

cachectic muscles from Fig. 2a and Supplementary Table 1. Pre-ranked GSEA was performed on standalone GSEA (v2.2.2) using the hallmark genes set *h.all.v5.2.symbols.gmt* for the differentially expressed genes obtained in Supplementary Table 1 and Fig 2 from C26m2 (common to 4T1), ranked by their log<sub>2</sub> fold change (FC) values with significant *p* and *q* values. *n*=2 controls and *n*=2 mice bearing 4T1 metastases; *n*=2 controls and *n*=2 mice bearing C26m2 metastases.

(k,l) Representative immunofluorescence images (k) and quantitation (l) of MyHC and tropomyosin (Tm). C2C12 cells expressing either *GFP* (Adeno-Con) or *Zip14* (Adeno-*Zip14*) were differentiated for 3 days and then treated with 0 or 50 μM ZnCl<sub>2</sub> for 24 h before analysis. Scale bars, 25 μm. Values were normalized to the respective untreated controls. *n*=5 samples per group for MyHC fluorescence staining analysis and *n*=3 samples per group for tropomyosin fluorescence staining analysis.

(m) Immunoblot analysis of skeletal actin, desmin, troponin T and MyLC in C2C12 cells expressing either *GFP* (Adeno-Con) or *Zip14* (Adeno-*Zip14*). Cells were differentiated for 3 days and subsequently treated with either 0 or 50 μM ZnCl<sub>2</sub> for 24 h before analysis. Data is representative of three independent experiments.

(n) Immunoblot analysis of the indicated proteins derived from lysates that were fractionated to generate soluble and myofibrillar (MF) fractions from C2C12 cells expressing either *GFP* (Adeno-Con) or *Zip14* (Adeno-*Zip14*) that were differentiated for 3 days and subsequently treated with either 0 or 50 μM ZnCl<sub>2</sub> for 24 h before analysis. Data is representative of three independent experiments.

(o) qRT-PCR analysis of genes associated with ubiquitination (*Trim63*, *MAFbx*, *Fbxo31*, *Musa1*, *Ubc*, *Usp14*), UPS (*Psm1*, *Psmc4*, *Psm11*) and autophagy (*Lc3*, *Gabarapl1*, *Bnip3*) pathways from C2C12 cells expressing either *GFP* (Adeno-Con) or *Zip14* (Adeno-*Zip14*) that were differentiated for 3 days and subsequently treated with either 0 or 50 μM ZnCl<sub>2</sub> for 24 h before analysis. *n*=3 samples per group.

(p) Immunoblot analysis of MyHC in C2C12 cells expressing *Zip14* (Adeno-*Zip14*) that were differentiated for 3 days and subsequently treated with either 0 or 50  $\mu\text{M}$   $\text{ZnCl}_2$  for 24 h before analysis. As indicated, cells were treated with either vehicle or MG132 (50  $\mu\text{M}$ ) 3 hours prior to harvest. Tubulin served as a loading control. Data is representative of three independent experiments.

(q) Immunoblot analysis for skeletal actin, troponin T and MyLC in gastrocnemius muscles from mice intramuscularly injected with AAV delivering either shCon or sh*Zip14* and subsequently injected with C26m2 cancer cells. Non-tumor-bearing mice were used as a control (see also Fig. 4d and 5h). Data is representative of three independent experiments.

(r-u) *Zip14* KO mice were intramuscularly injected in the gastrocnemius muscles with AAV delivering either *mCherry* control (AAV-Con) or *Zip14* (AAV-*Zip14*) and subsequently injected with 4T1 cancer cells four weeks after AAV injection. Muscles were then harvested five weeks after tumor-cell injection. (r) qRT-PCR analysis of *Zip14* expression and data was normalized to wild-type control mice. n=4 mice per group. (s) Representative immunofluorescence images of laminin expression shown in green and DAPI in blue (scale bars, 50  $\mu\text{m}$ ). (t) Morphometric analysis is depicted as the distribution frequency of fiber size categorized by fiber diameter. n=3 mice for Tb-*Zip14* KO injected with AAV-Con, and n=4 mice for Tb-*Zip14* KO injected with AAV-*Zip14*. (u) qRT-PCR analysis was performed for the indicated genes and normalized to AAV-Con. n=4 mice per group.

(v) Quantitation of the capillary contacts/fiber and percentage of SDH-positive fibers are shown in the gastrocnemius muscles from *Zip14* KO mice that were intramuscularly injected with AAV delivering either *mCherry* control (AAV-Con) or *Zip14* (AAV-*Zip14*). n=4 mice for tumor bearing mice injected with AAV-Con and n=3 mice for tumor bearing mice injected with AAV-*Zip14*.

(w) Immunoblot analysis of skeletal actin, troponin T and MyLC in gastrocnemius muscles from the indicated groups. Muscles were isolated from *Zip14*-WT and -KO mice with (Tb) or without (Con) 4T1 metastases. A separate group of *Zip14* KO mice were injected intramuscularly with

AAV-*mCherry* (con) or AAV-*Zip14* (*Zip14*) and subsequently injected with 4T1 tumor cells. All mice were harvested 5 weeks post tumor-cell injection. Data is representative of three independent experiments.

(x,y) qRT-PCR analysis of *Zip14* (x) and immunoblot analysis of MyHC and skeletal actin (y) from non-tumor-bearing mice that were intramuscularly injected in the gastrocnemius muscles with either AAV-*mCherry* (AAV-con) or AAV-*Zip14*. Muscles were harvested 5 weeks after AAV injection. n=4 mice per group for (x). Data is representative of three independent experiments (y).

Error bars represent SEM and all data were represented by mean  $\pm$  SEM. *P* values for (e,g,i,l,r,u,v and x) were determined by two-tailed, unpaired Student's *t* test. *P* values for (o) were determined by one-way ANOVA with post-hoc Tukey's test with *F* value (DFn, DFd) for o *Trim63* *F*(3, 8) = 40.7, *MAFbx* *F*(3, 8) = 0.64, *Fbxo31* *F*(3, 8) = 0.57, *Musa1* *F*(3, 8) = 1.4, *Psmc4* *F*(3, 8) = 5.8, *Psmc4* *F*(3, 8) = 16.9, *Psmc11* *F*(3, 8) = 22.4, *Ubc* *F*(3, 8) = 30.2, *Lc3* *F*(3, 8) = 6.5, *Usp14* *F*(3, 8) = 12.7, *Gabarapl1* *F*(3, 8) = 3.1, *Bnip3* *F*(3, 8) = 8.5. n.s., not significant. \**P*<0.05, \*\**P*<0.01, \*\*\**P*<0.001 and \*\*\*\**P*<0.0001. *P* values for (t) were determined by two-sided Welch's *t* test. Skel actin, skeletal actin; Tm, tropomyosin; TnT, troponin T; MyLC, Myosin light chain; Con, control; Tb, tumor-bearing.

### **Supplementary Figure 6. Original uncropped images of the blots shown in Main Figures.**

Full scans of blots shown from Fig. 5g, 5h and 5i.
